# Supplementary material for: Synthesis of spirocyclic 1,2-diamines by dearomatising intramolecular diamination of phenols
Source: Royal Society of Chemistry journal article supplement (doi:10.1039/d2cc06137f), 2022-12-12

## Synthesis of Spirocyclic 1,2-Diamines by Dearomatising Intramolecular Diamination of Phenols

Anthony Aimon, Mark J. =. Dow, Abigail R. Hanby, Ephraim A. Okolo, Christopher M. Pask,  
Adam Nelson\* and Stephen P. Marsden\*

### Supporting Information

#### Contents

|    |                                                                              |
|----|------------------------------------------------------------------------------|
| 1  | Table of contents                                                            |
| 2  | General experimental                                                         |
| 3  | Preparation of cyclisation precursors: compounds <b>1a-s</b>                 |
| 21 | Oxidative cyclisations: products <b>2a-s</b> (Tables 1 and 2)                |
| 30 | Preparation and cyclisation of alternative cyclisation precursors (Scheme 1) |
| 35 | Functional group transformations on spirocyclic diamines (Scheme 2)          |
| 40 | References                                                                   |
| 41 | X-ray crystal structures                                                     |
| 46 | <sup>1</sup> H and <sup>13</sup> C NMR spectra                               |

## General Experimental

All non-aqueous reactions were performed under an atmosphere of nitrogen unless otherwise stated. Water-sensitive reactions were performed in oven-dried glassware, cooled under nitrogen before use. Solvents were removed *in vacuo* using a Büchi rotary evaporator and a Vacuubrand PC2001 Vario diaphragm pump. A Genevac EZ-2 Elite centrifugal evaporator was used for the removal of MeOH–H<sub>2</sub>O after Mass-Directed purification. Tetrahydrofuran (THF), CH<sub>2</sub>Cl<sub>2</sub>, toluene and CH<sub>3</sub>CN were dried and purified by means of a Pure Solv MD solvent purification system (Innovative Technology Inc.). Anhydrous *N,N*-dimethylacetamide (DMA), *N,N*-dimethylformamide (DMF) and 1,4-dioxane was obtained in SureSeal bottles from Sigma-Aldrich. All other solvents used were of chromatography or analytical grade. Petrol refers to petroleum spirit (b.p. 40-60 °C). Commercially available starting materials were obtained from Sigma-Aldrich, Fluka, Acros or Alfa-Aesar and were used without purification unless stated.

Thin layer chromatography (TLC) was carried out on aluminium backed silica (Merck silica gel 60 F<sub>254</sub>) plates supplied by Merck. Visualisation of the plates was achieved using an ultraviolet lamp ( $\lambda_{\text{max}} = 254 \text{ nm}$ ), KMnO<sub>4</sub>, anisaldehyde or ninhydrin. LCMS analysis was generally carried out on an Agilent 1200 series LC system comprising a Bruker HCT Ultra ion trap mass spectrometer. The solvent system used was CH<sub>3</sub>CN/H<sub>2</sub>O + 0.1% formic acid with a Phenomenex Luna C18 50 × 2 mm 5 micron column.

Flash chromatography was carried out using silica gel 60 (60-63  $\mu\text{m}$  particles) supplied by Merck or using Biotage silica or ISOLUTE C<sub>18</sub> pre-packed cartridges on a Flashmaster II or CombiFlash Companion. Strong cation exchange solid phase extraction (SCX-SPE) was carried out using pre-packed Discovery DSC-SCX cartridges supplied by Supelco. Mass-directed HPLC purification was carried out using an Agilent 1260 Infinity HPLC system comprising an Agilent 6120 Quadrupole LC/MS and Agilent G1968D active splitter.

Optical rotation measurements were carried out at the sodium D-line (589 nm) on a Schmidt and Haensch H532 or an Optical Activity AA-1000 polarimeter instrument; concentrations are g/100 mL, temperatures given in °C, optical rotations are given in 10<sup>-1</sup>degcm<sup>2</sup>g<sup>-1</sup> (units are omitted). Infrared spectra were recorded on a Perkin-Elmer One FT-IR spectrometer with absorption reported in wavenumbers (cm<sup>-1</sup>). Chiral HPLC was carried out on either an Agilent 1100 or an Agilent Infinity 1290 series HPLC system. Racemic standards were obtained by preparing samples of both enantiomers and then combining in an approx. 1:1 ratio.

High resolution mass spectra (HRMS) were recorded on a Bruker Daltonics micrOTOF or Bruker MaXis Impact spectrometer with electrospray ionisation (ESI) source. Where EI ionisation was required, a Waters/Micromass GCT Premier spectrometer was used.

Proton (<sup>1</sup>H) and carbon (<sup>13</sup>C) NMR spectral data were collected on a Bruker Advance 400, 500 or 600, Bruker DPX500 or DPX300 spectrometers. All <sup>13</sup>C spectra are proton decoupled. Chemical shifts ( $\delta$ ) are quoted in parts per million (ppm) and referenced to the residual solvent peak. Coupling constants ( $J =$ ) are quoted in Hertz (Hz) and splitting patterns reported in an abbreviated manner: app. (apparent), s (singlet), d (doublet), t (triplet), q (quartet), m (multiplet). Assignments were made with the aid of COSY, DEPT-135, HMQC, HMBC and NOESY experiments.

## Preparation of cyclisation precursors 1a-s, 3 and 5

### 4-(3-Aminopropyl)phenol **S2**

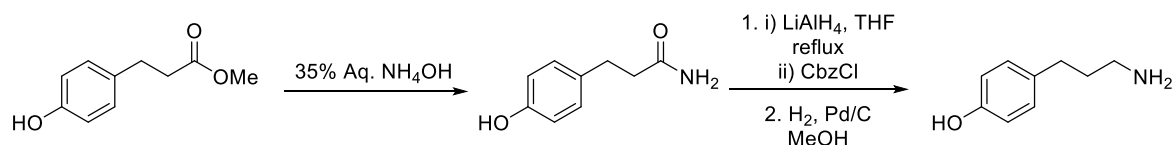

Methyl 3-(4-hydroxyphenyl)propionate (90.0 g, 500 mmol) was dissolved in 35% ammonium hydroxide (250 mL) and stirred vigorously overnight at rt. The reaction slurry was carefully poured into ice and conc. HCl (250 mL). Additional conc. HCl was then carefully added (until pH 4-6). The solution was extracted with EtOAc (3 × 300 mL), dried (Na<sub>2</sub>SO<sub>4</sub>) and concentrated *in vacuo* to give a thick oil that solidified upon standing. Recrystallization from EtOAc gave the primary amide **S1** as pale yellow cuboids (71 g, 430 mmol, 86%); mp (EtOAc): 118.9-119.6 °C, {Lit.<sup>1</sup> 119-121 °C}; IR ( $\nu_{\max}$  /cm<sup>-1</sup>) 3390, 3178, 3036, 2956, 1649, 1624, 1513, 1449, 1422, 1408, 1372, 1235, 1112; <sup>1</sup>H NMR (500 MHz; MeOD)  $\delta$  = 7.07 (2H, d, *J* = 8.5), 6.73 (2H, d, *J* = 8.5), 2.84 (2H, t, *J* = 7.5), 2.48 (2H, t, *J* = 7.5); <sup>13</sup>C NMR (126 MHz; MeOD)  $\delta$  = 178.4, 156.7, 132.9, 130.3, 116.1, 38.7, 31.9; HRMS (ESI<sup>+</sup>): Calculated for C<sub>9</sub>H<sub>12</sub>NO<sub>2</sub> ([M+H]<sup>+</sup>): 166.0862. Found: 166.0859.

To a suspension of lithium aluminum hydride (17.1 g, 450 mmol) in THF (225 mL) was added a solution of the primary amide (50.0 g, 300 mmol) in THF (150 mL) at 0 °C. The reaction mixture was warmed to rt and then refluxed for 48 h. The reaction mixture was cooled to 0 °C and the reaction was quenched drop-wise with water until effervescence ceased. Aqueous 2M NaOH (50 mL) was added followed by benzyl chloroformate (43 mL, 300 mmol). Upon consumption of the amine the reaction mixture was concentrated *in vacuo* and acidified with conc. HCl (until pH 6-7). The aqueous phase was extracted with EtOAc (3 × 250 mL), dried and concentrated *in vacuo*. The carbamate was passed through a short silica gel column eluting with EtOAc-hexanes (50:50), concentrated *in vacuo*, dissolved in MeOH (250 mL), Pd/C (2 g, 10% w/w) was added and H<sub>2</sub> was bubbled through using a balloon for 2 h. The solution was filtered and concentrated *in vacuo*. Dry-flash column chromatography, eluting with CH<sub>2</sub>Cl<sub>2</sub>/EtOH/NH<sub>4</sub>OH (50:8:1), gave the amine **S2** (22.3 g, 147 mmol, 49%) as a pale yellow oil which solidifies upon standing. mp (CH<sub>2</sub>Cl<sub>2</sub>-EtOH): 91.1-91.7 °C {Lit.<sup>2</sup> 102 °C}; IR ( $\nu_{\max}$  /cm<sup>-1</sup>) 3328, 3279, 2850, 2500, 2206, 1600, 1483, 1247, 1230, 1169; <sup>1</sup>H NMR (500 MHz; MeOD)  $\delta$  = 6.96 (2H, d, *J* = 8.5), 6.66 (2H, d, *J* = 8.5), 2.58 (2H, t, *J* = 7.3), 2.50 (2H, t, *J* = 7.3), 1.68 (2H, app quint, *J* = 7.4); <sup>13</sup>C NMR (126 MHz; MeOD)  $\delta$  = 156.8, 133.8, 130.3, 130.2, 116.3, 116.2, 42.0, 35.8, 33.3; HRMS (ESI<sup>+</sup>): Calculated for C<sub>9</sub>H<sub>14</sub>NO ([M+H]<sup>+</sup>): 152.1069. Found: 152.1069.

### 1-Benzyl-3-[3-(4-hydroxyphenyl)propyl]urea **1a**

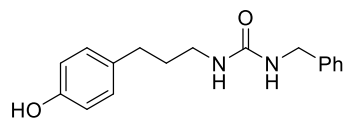

Benzyl isocyanate (1.3 mL, 10.9 mmol, 1.1 eq) was added in one portion to the above amine **S2** (1.5 g, 9.9 mmol) in MeCN (40 mL). The reaction mixture was stirred at rt. After 16 h, the

precipitate was collected and recrystallized from MeCN to give the urea as a colourless solid (2.2 g, 7.8 mmol, 79%); mp (MeCN) 104.9-106.7 °C; IR ( $\nu_{\max}$  / $\text{cm}^{-1}$ ) 3427, 3337, 3032, 2924, 2479, 1608, 1558, 1514, 1491, 1440, 1429, 1360, 1254;  $^1\text{H}$  NMR (500 MHz; MeOD)  $\delta$  = 7.37 – 7.27 (4H, m), 7.27 – 7.18 (1H, m), 7.01 (2H, d,  $J$  = 8.5), 6.71 (2H, d,  $J$  = 8.5), 4.33 (2H, s), 3.16 (2H, t,  $J$  = 7.0), 2.56 (2H, t,  $J$  = 7.7 Hz), 1.76 (2H, app quint,  $J$  = 7.3);  $^{13}\text{C}$  NMR (126 MHz; MeOD)  $\delta$  = 181.7, 161.2, 156.4, 141.3, 133.9, 130.2, 130.3, 129.4, 128.2, 128.1, 127.9, 116.1, 44.7, 40.6, 33.4, 33.2; HRMS (ESI $^+$ ): Calculated for  $\text{C}_{17}\text{H}_{21}\text{N}_2\text{O}_2$  ([M+H] $^+$ ): 285.1597. Found: 285.1593.

### 3-Cyclopropyl-1-[3-(4-hydroxyphenyl)propyl]urea 1b

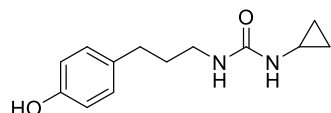

Cyclopropyl isocyanate (606 mg, 7.30 mmol, 1.1 eq) was added in one portion to the amine **S2** (1.0 g, 6.6 mmol) in MeCN (25 mL). Sodium hydroxide 2M (20 mL) was added and the reaction mixture was heated to reflux for 1 h. After concentration *in vacuo*, the reaction mixture was neutralized using aqueous hydrochloric acid (2M). The phases were separated and the aqueous phase was extracted with EtOAc (3 × 20 mL). The organic extracts were combined, dried over  $\text{Na}_2\text{SO}_4$  and concentrated *in vacuo*. Flash column chromatography, eluting with EtOAc gave the urea as a colourless oil (1.3 g, 5.4 mmol, 83%); IR ( $\nu_{\max}$  / $\text{cm}^{-1}$ ) 3327, 3011, 2929, 2856, 1639, 1554, 1514, 1453, 1231;  $^1\text{H}$  NMR (400 MHz; MeOD)  $\delta$  = 7.03 (2H, d,  $J$  = 8.5), 6.72 (2H, d,  $J$  = 8.5), 3.17 (2H, t,  $J$  = 7.0), 2.55 (2H, t,  $J$  = 7.4), 2.44 (1H, tt,  $J$  = 6.9, 3.8), 1.78 (2H, app quint,  $J$  = 7.4), 0.70 (2H, td,  $J$  = 6.9, 5.0), 0.50 – 0.43 (2H, m);  $^{13}\text{C}$  NMR (101 MHz; MeOD)  $\delta$  = 162.1, 156.4, 133.9, 130.3, 116.1, 40.6, 33.4, 33.3, 23.1, 7.5; HRMS (ESI $^+$ ): Calculated for  $\text{C}_{13}\text{H}_{19}\text{N}_2\text{O}_2$  ([M+H] $^+$ ): 235.1441. Found: 235.1439.

### 1-[3-(4-Hydroxyphenyl)propyl]-3-isopropylurea 1c

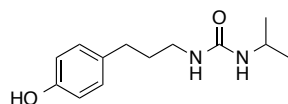

Isopropyl isocyanate (1.64 mL, 16.7 mmol, 1.01 eq.) was added to a solution of the amine **S2** (2.50 g, 16.6 mmol, 1.0 eq.) in anhydrous THF and the mixture was refluxed for 1 h. The reaction mixture was evaporated *in vacuo*. Flash chromatography with 50 – 100% EtOAc in hexane afforded the product as a colourless oil (3.24 g, 13.6 mmol, 83% yield);  $R_f$  = 0.55 (100% EtOAc). IR  $\nu_{\max}$  (neat)/ $\text{cm}^{-1}$ : 3334, 3014, 2969, 2931, 2872, 1558, 1514, 1455, 1240.  $^1\text{H}$  NMR (500 MHz, MeOD)  $\delta$  = 7.02 (2H, d,  $J$  = 8.4), 6.74 (2H, d,  $J$  = 8.4), 3.82 (1H, hept,  $J$  = 6.5), 3.13 (2H, t,  $J$  = 7.0), 2.53 (2H, t,  $J$  = 7.5), 1.76 (2H, quint,  $J$  = 7.5), 1.14 (6H, d,  $J$  = 6.6).  $^{13}\text{C}$  NMR (125 MHz, MeOD):  $\delta$  = 160.7, 156.5, 134.0, 130.4, 116.3, 43.0, 40.6, 33.6, 33.3, 23.7. HRMS (ESI):  $\text{C}_{13}\text{H}_{21}\text{N}_2\text{O}_2$  [M + H] $^+$ : calculated 237.1598, found 237.1592.

### 1-[3-(4-Hydroxyphenyl)propyl]-3-(2-methoxyethyl)urea 1d

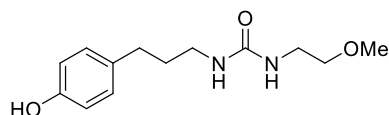

Following a procedure adapted from Padiya *et al.*,<sup>1</sup> to a solution of 2-methoxyethylamine (90 mg, 1.2 mmol) in water (10 mL) at 0 °C was added CDI (194 mg, 1.20 mmol, 1.0 eq). After 10 min 4-(3-aminopropyl)phenol **S2** (150 mg, 1.00 mmol) was added in a MeCN–H<sub>2</sub>O mixture (2 mL, 50:50). The reaction mixture was stirred for 6 h then EtOAc (20 mL) was added and the phases were separated. The aqueous phase was extracted with EtOAc (3 × 10 mL). Flash column chromatography, eluting with EtOAc gave the urea (78 mg, 0.31 mmol, 31%) as a colourless oil. IR ( $\nu_{\max}$  /cm<sup>-1</sup>) 3336, 2929, 2865, 1627, 1613, 1557, 1512, 1449, 1363, 1233, 1108, 1090; <sup>1</sup>H NMR (500 MHz; MeOD)  $\delta$  = 6.95 (2H, d, *J* = 8.4), 6.69 (2H, d, *J* = 8.4), 3.40 (2H, t, *J* = 5.0), 3.30 (3H, s), 3.25 (2H, t, *J* = 5.0), 3.08 (2H, t, *J* = 7.0), 2.99 (1H, br s), 2.94 (1H, br s), 2.50 (2H, t, *J* = 7.6), 1.70 (2H, app quint, *J* = 7.2); <sup>13</sup>C NMR (126 MHz; MeOD)  $\delta$  = 156.5, 147.7, 133.9, 130.3, 116.1, 73.1, 58.9, 40.8, 40.5, 33.4, 33.2; HRMS (ESI<sup>+</sup>): Calculated for C<sub>13</sub>H<sub>21</sub>N<sub>2</sub>O<sub>3</sub> ([M+H]<sup>+</sup>): 253.1546. Found: 253.1546.

### Ethyl 2-([3-(4-hydroxyphenyl)propyl]carbamoyl)amino)acetate **1e**

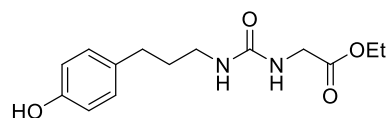

Ethyl isocyanatoacetate (462 mg, 3.6 mmol, 1.1 eq) was added in one portion to the amine **S2** (500 mg, 3.3 mmol) in MeCN (14 mL). The reaction mixture was stirred 5 h at rt. The reaction was concentrated *in vacuo*, water (10 mL) was added and the reaction was extraction with EtOAc (3 × 25 mL), dried (Na<sub>2</sub>SO<sub>4</sub>), filtered and concentrated *in vacuo*. Column chromatography, eluting with CH<sub>2</sub>Cl<sub>2</sub>–MeOH (99/1 → 95/5) have the urea as a colourless oil (610 mg, 2.17 mmol, 66%); IR ( $\nu_{\max}$  /cm<sup>-1</sup>) 2921, 1741, 1613, 1532, 1514, 1263, 1217, 731, 703; <sup>1</sup>H NMR (300 MHz; MeOD)  $\delta$  = 7.04 (2H, d, *J* = 8.5), 6.72 (2H, d, *J* = 8.5), 4.20 (2H, q, *J* = 7.1), 3.89 (2H, s), 3.15 (2H, t, *J* = 7.9), 2.57 (2H, t, *J* = 6.7), 1.77 (2H, tt, *J* = 7.5, 6.5), 1.29 (3H, t, *J* = 7.1); <sup>13</sup>C NMR (75 MHz, MeOD)  $\delta$  = 172.8, 161.1, 156.4, 133.9, 130.3, 116.1, 62.1, 42.8, 40.6, 33.4, 33.2, 14.5; HRMS (ESI<sup>+</sup>): Calculated for C<sub>14</sub>H<sub>20</sub>N<sub>2</sub>NaO<sub>4</sub> ([M+Na]<sup>+</sup>): 303.1315. Found: 303.1309.

### 3-[3-(4-Hydroxyphenyl)propyl]-1-(4-methylbenzenesulfonyl)urea **1f**

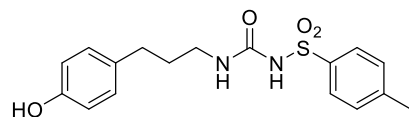

Tosyl isocyanate (1.44 g, 7.3 mmol, 1.1 eq) was added in one portion to the amine **S2** (1.00 g, 6.6 mmol) in MeCN (33 mL). The reaction mixture was stirred 5 h at rt. Water (5 mL) was added and the reaction was concentrated *in vacuo*, extracted with EtOAc (3 × 25 mL), dried (Na<sub>2</sub>SO<sub>4</sub>), filtered and concentrated *in vacuo*. Column chromatography, eluting with EtOAc–hexanes (50:50) gave the sulfonyl urea as a pale yellow oil (2.04 g, 5.9 mmol, 89%); IR ( $\nu_{\max}$  /cm<sup>-1</sup>) 3436, 3333, 3099, 2921, 1667, 1614, 1595, 1548, 1515, 1451, 1439, 1327, 1154, 1086; <sup>1</sup>H NMR  $\delta$  (400 MHz, MeOD)  $\delta$  = 7.87–7.83 (2H, d, *J* = 8.4), 7.37 (2H, d, *J* = 8.4), 6.90 (2H, d, *J* = 8.5), 6.66 (2H, d, *J* = 8.5), 3.08 (2H, t, *J* = 6.9), 2.42–2.37 (5H, m (includes 3H, s at 2.40)), 1.70–1.60 (2H, m); <sup>13</sup>C NMR (101 MHz, MeOD)  $\delta$  = 156.4, 153.8, 145.7, 138.6, 133.5, 130.6,

130.2, 128.5, 116.1, 40.3, 32.9, 32.6, 21.5; HRMS (ESI<sup>+</sup>): Calculated for C<sub>17</sub>H<sub>21</sub>N<sub>2</sub>O<sub>4</sub>S ([M+H]<sup>+</sup>): 349.1216. Found: 349.1212.

### [3-(4-Hydroxyphenyl)propyl]urea **1g**

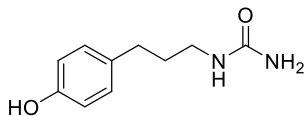

Potassium cyanate (324 mg, 4 mmol) was added to a solution of the phenol **S2** (500 mg, 3.3 mmol) in HCl 2M (5 mL), the reaction was stirred for 16h. The reaction was extracted with EtOAc (3 × 25 mL), dried (Na<sub>2</sub>SO<sub>4</sub>), filtered and concentrated *in vacuo*. Column chromatography, eluting with CH<sub>2</sub>Cl<sub>2</sub>—MeOH (95/5) gave the urea as a colourless solid (582 mg, 2.99 mmol, 90%); IR (ν<sub>max</sub>/cm<sup>-1</sup>) 3198, 1651, 1591, 1545, 1509, 1451, 1374, 1348; <sup>1</sup>H NMR δ (400 MHz, MeOD) δ = 7.00 (2H, d, *J* = 8.5), 6.69 (2H, d, *J* = 8.5), 3.09 (2H, t, *J* = 7.0), 2.54 (2H, t, *J* = 7.7), 1.78 – 1.69 (2H, m); <sup>13</sup>C NMR (101 MHz, MeOD) δ = 162.3, 156.4, 133.8, 130.2, 116.1, 40.5, 33.3, 33.1; HRMS (ESI<sup>+</sup>): Calculated for C<sub>10</sub>H<sub>15</sub>N<sub>2</sub>O<sub>2</sub> ([M+H]<sup>+</sup>): 195.1128. Found: 195.1123.

### 1-(4-Chlorophenyl)-3-[3-(4-hydroxyphenyl)propyl]urea **1h**

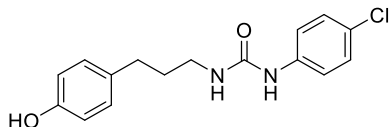

4-Chlorophenyl isocyanate (447 mg, 2.91 mmol, 1.1 eq) was added in one portion to the amine **S2** (400 mg, 2.64 mmol) in MeCN (14 mL). The reaction mixture was stirred 5 h at rt. The precipitated solid was filtered using vacuum filtration and washed with MeCN. The solid was dried under vacuum to give the urea as a colourless solid (412 mg, 1.35 mmol, 51%). m.p. (MeCN) 140.8–141.6 °C; IR (ν<sub>max</sub>/cm<sup>-1</sup>) 3321, 2941, 2865, 2466, 1617, 1513, 1495, 1469, 1245, 1089; <sup>1</sup>H NMR (400 MHz; MeOD) δ = 7.33 (2H, d, *J* = 8.9), 7.21 (2H, d, *J* = 8.9), 7.00 (2H, d, *J* = 8.5), 6.70 (2H, d, *J* = 8.5), 3.17 (2H, t, *J* = 7.0), 2.56 (2H, app t, *J* = 7.7), 1.77 (2H, app quint, *J* = 7.3); <sup>13</sup>C NMR (101 MHz; MeOD) δ = 158.0, 156.4, 139.9, 133.7, 130.2, 129.6, 128.0, 121.2, 116.1, 40.3, 33.2 (2 signals); HRMS (ESI<sup>+</sup>): Calculated for C<sub>16</sub>H<sub>18</sub><sup>35</sup>ClN<sub>2</sub>O<sub>2</sub> ([M+H]<sup>+</sup>): 305.1051. Found: 305.1053.

### 1-(3-(4-Hydroxyphenyl)propyl)-3-(4-methoxyphenyl)urea **1i**

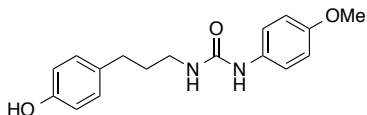

4-Methoxyphenyl isocyanate (0.30 mL, 2.30 mmol, 1.01 eq.) was added to a solution of the amine **S2** (345 mg, 2.28 mmol, 1.0 eq.) in anhydrous THF and the mixture was refluxed for 1 h. The reaction mixture was evaporated *in vacuo*. Flash chromatography with 50 – 100% EtOAc in hexane afforded the title compound as a brown oil (497 mg, 1.66 mmol, 73% yield); R<sub>f</sub> = 0.41 (70% EtOAc in hexane). IR ν<sub>max</sub> (neat)/cm<sup>-1</sup>: 3308, 3053, 2935, 2837, 1647, 1554,

1509, 1441, 1228.  $^1\text{H}$  NMR  $\delta$  (300 MHz, MeOD)  $\delta$  = 7.10 (2H, d,  $J$  = 9.0), 6.90 (2H, d,  $J$  = 8.4), 6.72 (2H, d,  $J$  = 9.0), 6.59 (2H, d,  $J$  = 8.7), 3.63 (3H, s), 3.07 (2H, t,  $J$  = 6.9), 2.45 (2H, t,  $J$  = 7.2), 1.67 (2H, quint,  $J$  = 7.3).  $^{13}\text{C}$  NMR (75 MHz, MeOD)  $\delta$  = 158.8, 157.0, 156.4, 133.8, 133.6, 130.2, 122.8, 116.1, 115.0, 55.8, 40.4, 33.3, 33.2. HRMS (ESI):  $\text{C}_{17}\text{H}_{21}\text{N}_2\text{O}_3$  [ $\text{M} + \text{H}^+$ ]: calculated 301.1547, found 301.1543.

### 3-[3-(4-Hydroxyphenyl)propyl]-1-[4-(trifluoromethyl)phenyl]urea **1j**

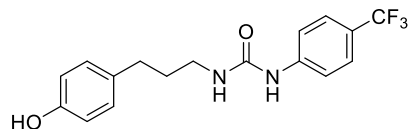

4-(Trifluoromethyl)phenyl isocyanate (1.44 g, 7.30 mmol, 1.1 eq) was added in one portion to the amine **S2** (1.0 g, 6.6 mmol) in MeCN (33 mL). The reaction mixture was stirred overnight at rt and concentrated *in vacuo* to give the crude sulfonyl urea. Flash column chromatography, eluting with EtOAc gave the urea as a colourless oil (1.8 g, 5.2 mmol, 78%); IR ( $\nu_{\text{max}}$  / $\text{cm}^{-1}$ ) 3336, 2937, 1657, 1600, 1546, 1512, 1409, 1318, 1231, 1161, 1107, 1065, 1014;  $^1\text{H}$  NMR  $\delta$  (400 MHz; MeOD) 7.57 – 7.51 (4H, m), 7.04 (2H, d,  $J$  = 8.5), 6.72 (2H, d,  $J$  = 8.5), 3.22 (2H, t,  $J$  = 7.0), 2.60 (2H, app t,  $J$  = 7.0), 1.22 (2H, app quint,  $J$  = 7.0);  $^{13}\text{C}$  NMR (101 MHz; MeOD)  $\delta$  = 157.7, 156.4, 144.7, 133.7, 130.3, 126.9 (q,  $J$  = 4), 125.9 (q,  $J$  = 270), 124.5 (q,  $J$  = 32), 119.1, 116.2, 40.3, 33.2, 33.1; HRMS (ESI $^+$ ): Calculated for  $\text{C}_{17}\text{H}_{18}\text{F}_3\text{N}_2\text{O}_2$  ([ $\text{M} + \text{H}^+$ ]): 339.1310. Found: 339.1314.

### Preparation of 2-methoxy-substituted substrates **1k-n**

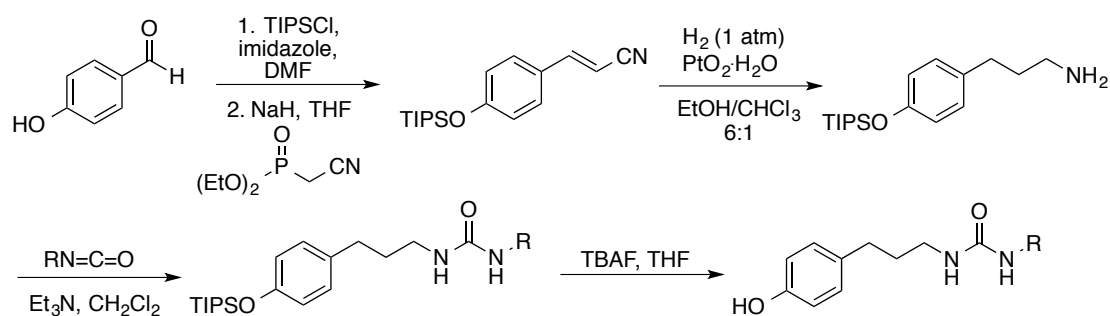

### 3-Methoxy-4-[[tris(propan-2-yl)silyl]oxy]benzaldehyde **S3**

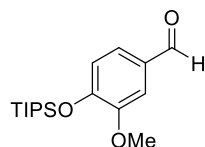

Vanillin (10.0 g, 65.7 mmol) was dissolved in DMF (35 mL). Triisopropylsilyl chloride (17 mL, 79.4 mmol, 1.21 eq) was added and the reaction mixture was cooled down to 0 °C before the addition of imidazole (5.37 g, 78.9 mmol, 1.20 eq). The reaction mixture was warmed to rt and stirred overnight. EtOAc (250 mL) and H<sub>2</sub>O (100 mL) were added. The phases were separated and the organic phase was successively washed with H<sub>2</sub>O (2 × 100 mL), aqueous HCl (1M, 100 mL), aqueous saturated NaHCO<sub>3</sub> (100 mL) and brine (100 mL). The organic

phase was then dried over  $\text{Na}_2\text{SO}_4$ , filtered and concentrated *in vacuo*. Flash column chromatography ( $\text{SiO}_2$ , hexane–EtOAc, 95:5) gave the title compound (19.5 g, 63.2 mmol, 96%) as a colourless oil. IR ( $\nu_{\text{max}}/\text{cm}^{-1}$ ) 2943, 2866, 1696, 1591, 1505, 1462, 1284, 1192, 1123, 1070;  $^1\text{H}$  NMR (400 MHz,  $\text{CDCl}_3$ )  $\delta$  = 9.83 (1H, d,  $J$  = 0.6), 7.39 (1H, d,  $J$  = 1.8), 7.35 (1H, ddd,  $J$  = 8.0, 1.8, 0.6), 6.97 (1H, d,  $J$  = 8.0), 3.86 (3H, s), 1.34 – 1.20 (3H, m), 1.09 (18H, d,  $J$  = 7.5);  $^{13}\text{C}$  NMR (101 MHz,  $\text{CDCl}_3$ )  $\delta$  = 191.1, 151.9, 151.7, 130.7, 126.3, 120.2, 110.2, 55.5, 17.9, 13.0; HRMS ( $\text{ESI}^+$ ): Calculated for  $\text{C}_{17}\text{H}_{29}\text{O}_3\text{Si}$  ( $[\text{M}+\text{H}]^+$ ): 309.1880. Found: 309.1880.

#### (2E/Z)-3-(3-Methoxy-4-{{tris(propan-2-yl)silyl}oxy}phenyl)prop-2-enenitrile S4

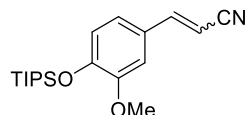

Following a procedure adapted from Pouységu *et al.*,<sup>2</sup> to a solution of THF (150 mL) at 0 °C was added NaH (60% in mineral oil, 2.90 g, 72.5 mmol, 1.15 eq) portionwise and the suspension was stirred for 10 min. Diethylcyanophosphonate (11.8 mL, 72.9 mmol, 1.16 eq) was added dropwise at 0 °C and the reaction mixture was stirred 10 min before the addition of the above aldehyde **S3** (19.4 g, 62.9 mmol) in THF (46 mL). The reaction mixture was stirred for 2 h at 0 °C, and MTBE was added (300 mL) before filtration of the reaction mixture directly over a pad of silica washed with MTBE. The nitrile (20.5 g, 61.8 mmol, 98%) was taken to the next step without further purification required. Alternatively the nitriles could be purified by flash column chromatography ( $\text{SiO}_2$ , hexane–EtOAc; 95:5). IR ( $\nu_{\text{max}}/\text{cm}^{-1}$ ) 2940, 2864, 2208, 1593, 1509, 1464, 1280, 1163; **Major E isomer**  $^1\text{H}$  NMR (400 MHz,  $\text{CDCl}_3$ )  $\delta$  = 7.30 (1H, d,  $J$  = 16.6, propene 3-H), 6.93 (1H, dd,  $J$  = 8.1, 2.1, Ar 6-H), 6.90 (1H, d,  $J$  = 2.1, Ar 2-H), 6.86 (1H, d,  $J$  = 8.1, Ar 5-H), 5.70 (1H, d,  $J$  = 16.5, propene 2-H), 3.83 (3H, s, OMe), 1.30 – 1.20 (3H, m, 3 × TIPS-H), 1.09 (18H, d,  $J$  = 7.3, 6 × TIPS- $\text{H}_3$ );  $^{13}\text{C}$  NMR (101 MHz,  $\text{CDCl}_3$ )  $\delta$  = 151.3, 150.4, 148.9, 127.1, 121.5, 120.6, 118.7, 110.1, 93.4, 55.5, 17.8, 12.9; **Minor E isomer** (400 MHz,  $\text{CDCl}_3$ )  $\delta$  = 7.58 (1H, d,  $J$  = 2.2), 7.14 (1H, dd,  $J$  = 8.2, 2.2), 7.00 (1H, d,  $J$  = 12.1), 6.95 – 6.85 (1H, m (massif with maj = or isomer)), 5.26 (1H, d,  $J$  = 12.1), 3.86 (3H, s), 1.33 – 1.20 (3H, m), 1.09 (18H, d,  $J$  = 7.2);  $^{13}\text{C}$  NMR (101 MHz,  $\text{CDCl}_3$ )  $\delta$  = (1 peak missing, most probably hidden behind carbon peak of the major isomer) 151.0, 148.5, 127.3, 123.9, 120.3, 118.2, 111.3, 91.5, 17.7, 12.3; HRMS ( $\text{ESI}^+$ ): Calculated for  $\text{C}_{19}\text{H}_{30}\text{NO}_2\text{Si}$  ( $[\text{M}+\text{H}]^+$ ): 332.2040. Found: 332.2038.

#### Amine salt S5

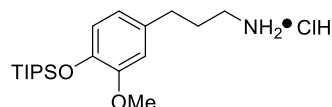

Following a procedure adapted from Pouységu *et al.*,<sup>2</sup> to a mixture of EtOH– $\text{CHCl}_3$  (6:1, 56 mL) was added the above unsaturated nitrile (3.89 g, 11.8 mmol).  $\text{PtO}_2 \cdot \text{H}_2\text{O}$  (187 mg, 0.823 mmol, 0.07 eq) was added and the reaction mixture was stirred under an atmosphere (balloon) of  $\text{H}_2$  overnight. MeOH (100 mL) was added and the stirring was stopped. After 30 min the reaction mixture was removed from the reaction flask without the solid platinum residue. After concentration *in vacuo* the amine salt was used directly without further purification.



### 1-Benzyl-3-[3-(4-hydroxy-3-methoxyphenyl)propyl]urea 1k

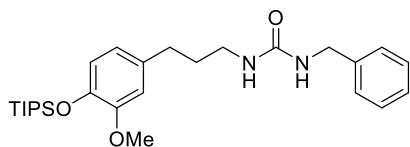

To a solution of the crude amine salt **S5** (1.79 g,  $\leq 4.80$  mmol) in  $\text{CH}_2\text{Cl}_2$  (20 mL) at  $0^\circ\text{C}$  was successively added  $\text{Et}_3\text{N}$  (940  $\mu\text{L}$ , 6.74 mmol,  $\geq 1.40$  eq) and benzyl isocyanate (600  $\mu\text{L}$ , 4.86 mmol,  $\geq 1.01$  eq). The reaction mixture was stirred for 30 min at rt. Saturated aqueous  $\text{NH}_4\text{Cl}$  (20 mL) and  $\text{H}_2\text{O}$  (20 mL) were added and the phases were separated. The aqueous phase was extracted with  $\text{CH}_2\text{Cl}_2$  ( $2 \times 30$  mL). The organic extracts were washed with brine (20 mL), dried over  $\text{Na}_2\text{SO}_4$ , filtered and concentrated *in vacuo*. Flash column chromatography ( $\text{SiO}_2$ , hexane– $\text{EtOAc}$ , 8:2 to 6:4) afforded the desired urea **S6** as a colourless oil (1.37 g, 2.90 mmol, 60% over two steps). IR ( $\nu_{\text{max}}/\text{cm}^{-1}$ ) 3331, 2942, 2865, 1625, 1580, 1513, 1453, 1316, 1272, 1156;  $^1\text{H}$  NMR (400 MHz;  $\text{CDCl}_3$ )  $\delta$  = 7.32 – 7.17 (5H, m), 6.75 (1H, d,  $J$  = 8.0), 6.60 (1H, d,  $J$  = 1.6), 6.60 (1H, dd,  $J$  = 8.0, 1.6), 5.31 – 5.05 (1H, m), 5.01 – 4.74 (1H, m), 4.27 – 4.24 (2H, m), 3.74 (3H, s), 3.15 – 3.06 (2H, m), 2.54 – 2.45 (2H, m), 1.76 – 1.65 (2H, m), 1.30 – 1.18 (3H, m), 1.08 (18H, d,  $J$  = 7.2);  $^{13}\text{C}$  NMR (101 MHz;  $\text{CDCl}_3$ )  $\delta$  = 158.7, 150.8, 143.7, 139.5, 134.8, 128.6, 127.4, 127.2, 120.3, 120.3, 112.6, 55.6, 44.4, 40.2, 32.9, 32.1, 18.0, 14.3; HRMS ( $\text{ESI}^+$ ): Calculated for  $\text{C}_{27}\text{H}_{43}\text{N}_2\text{O}_3\text{Si}$  ( $[\text{M}+\text{H}]^+$ ): 471.3037. Found: 471.3036.

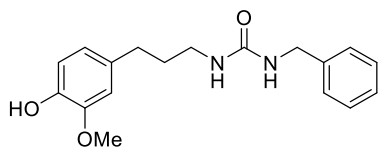

To a solution of the above urea (1.22 g, 2.58 mmol) in THF (5 mL) at  $0^\circ\text{C}$  was added  $n\text{Bu}_4\text{NF}$  (1M in THF, 2.8 mL, 2.8 mmol, 1.1 eq) dropwise. The reaction mixture warmed to rt and stirred for 2 h. After concentration *in vacuo* the residue was purified by flash column chromatography ( $\text{SiO}_2$ ,  $\text{CH}_2\text{Cl}_2$  then  $\text{CH}_2\text{Cl}_2$ – $\text{MeOH}$ , 98:2 to 96:4) to afford the desired phenol as a colourless solid (803 mg, 2.55 mmol, 99%). m.p. ( $\text{CH}_2\text{Cl}_2$ )  $93.2$ – $93.9^\circ\text{C}$ ; IR ( $\nu_{\text{max}}/\text{cm}^{-1}$ ) 3506, 3305, 3030, 2928, 2858, 1621, 1570, 1515, 1437, 1311, 1231, 1275, 1231, 1120, 1026;  $^1\text{H}$  NMR (400 MHz;  $\text{CDCl}_3$ )  $\delta$  = 7.31–7.18 (5H, m), 6.80 (1H, d,  $J$  = 8.0), 6.62 (1H, d,  $J$  = 1.7), 6.58 (1H, dd,  $J$  = 8.0, 1.7), 5.88 (1H, s), 5.42 (1H, br. s), 5.14 (1H, br. s), 4.26 (2H, d,  $J$  = 5.8), 3.81 (3H, s), 3.11 (2H, app q,  $J$  = 6.7), 2.49 (2H, t,  $J$  = 7.7), 1.70 (2H, app tt,  $J$  = 7.4, 7.4);  $^{13}\text{C}$  NMR (101 MHz;  $\text{CDCl}_3$ )  $\delta$  = 158.9, 146.6, 143.9, 139.5, 133.6, 128.6, 127.3, 127.3, 120.9, 114.4, 111.2, 55.9, 44.3, 40.0, 32.9, 32.1; HRMS ( $\text{ESI}^+$ ): Calculated for  $\text{C}_{18}\text{H}_{23}\text{N}_2\text{O}_3$  ( $[\text{M}+\text{H}]^+$ ): 315.1703. Found: 315.1699.

### Ethyl 2-([3-(4-hydroxy-3-methoxyphenyl)propyl]carbamoyl)amino)acetate 1l

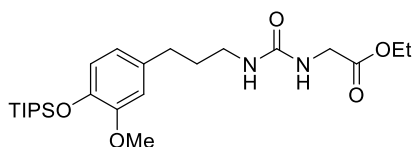

To a solution of the crude amine salt **S5** (840 mg,  $\leq 2.25$  mmol) in  $\text{CH}_2\text{Cl}_2$  (15 mL) at  $0^\circ\text{C}$  was successively added  $\text{Et}_3\text{N}$  (470  $\mu\text{L}$ , 3.37 mmol,  $\geq 1.50$  eq) and ethyl isocyanatoacetate (275  $\mu\text{L}$ , 2.45 mmol,  $\geq 1.09$  eq). The reaction mixture was stirred for 2 h at rt. Saturated aqueous  $\text{NH}_4\text{Cl}$  (15 mL) and  $\text{H}_2\text{O}$  (10 mL) were added and the phases were separated. The aqueous phase was extracted with  $\text{CH}_2\text{Cl}_2$  ( $2 \times 20$  mL). The organic extracts were washed with brine (20 mL), dried over  $\text{Na}_2\text{SO}_4$ , filtered and concentrated *in vacuo*. Flash column chromatography ( $\text{SiO}_2$ , hexane– $\text{EtOAc}$ , 7:3 to 5:5) afforded the desired urea **S7** as a colourless oil (627 mg, 1.40 mmol, 62% over two steps). IR ( $\nu_{\text{max}}/\text{cm}^{-1}$ ) 3368, 2941, 2865, 1741, 1625, 1574, 1511, 1416, 1278, 1191, 1156, 1030;  $^1\text{H}$  NMR (400 MHz;  $\text{CDCl}_3$ )  $\delta$  = 6.76 (1H, d,  $J$  = 8.0), 6.65 (1H, d,  $J$  = 1.9), 6.58 (1H, dd,  $J$  = 8.0 and 1.9), 4.97 (1H, t,  $J$  = 5.2), 4.72 (1H, t,  $J$  = 5.5), 4.18 (2H, q,  $J$  = 7.1), 3.97 (2H, d,  $J$  = 5.4), 3.77 (3H, s), 3.19 (2H, td,  $J$  = 6.8, 5.5), 2.56 (2H, t,  $J$  = 7.7), 1.84 – 1.75 (2H, m), 1.31 – 1.19 (6H, m), 1.08 (18H, d,  $J$  = 7.2);  $^{13}\text{C}$  NMR (101 MHz;  $\text{CDCl}_3$ )  $\delta$  = 171.5, 157.9, 150.8, 143.7, 134.7, 120.3, 120.3, 112.6, 61.4, 55.6, 42.3, 40.3, 32.9, 32.0, 18.0, 14.3, 13.0; HRMS ( $\text{ESI}^+$ ): Calculated for  $\text{C}_{24}\text{H}_{43}\text{N}_2\text{O}_4\text{Si}$  ( $[\text{M}+\text{H}]^+$ ): 467.2935. Found: 467.2934.

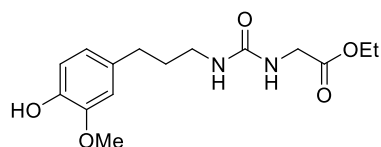

To a solution of the above urea (627 mg, 1.40 mmol) in THF (2 mL) at  $0^\circ\text{C}$  was added  $n\text{Bu}_4\text{NF}$  (1M in THF, 1.6 mL, 1.6 mmol, 1.1 eq) dropwise. The reaction mixture warmed to rt and stirred for 2 h. After concentration *in vacuo* the residue was purified by flash column chromatography ( $\text{SiO}_2$ ,  $\text{CH}_2\text{Cl}_2$  then  $\text{CH}_2\text{Cl}_2$ – $\text{MeOH}$ , 98:2 to 96:4) to afford the desired phenol as a colourless oil (397 mg, 1.28 mmol, 91%). IR ( $\nu_{\text{max}}/\text{cm}^{-1}$ ) 3365, 2859, 1737, 1637, 1562, 1513, 1451, 1374, 1268, 1192, 1027;  $^1\text{H}$  NMR (400 MHz;  $\text{CDCl}_3$ )  $\delta$  = 6.81 (1H, d,  $J$  = 8.0), 6.67 (1H, d,  $J$  = 1.7), 6.64 (1H, dd,  $J$  = 8.0, 1.7), 5.60 (1H, s), 5.08 (1H, t,  $J$  = 5.2), 4.82 (1H, t,  $J$  = 5.6), 4.18 (2H, q,  $J$  = 7.1), 3.97 (2H, d,  $J$  = 5.4), 3.85 (3H, s), 3.19 (2H, td,  $J$  = 6.8, 5.5), 2.56 (2H, t,  $J$  = 7.7), 1.82 – 1.73 (2H, m), 1.26 (3H, t,  $J$  = 7.1);  $^{13}\text{C}$  NMR (101 MHz;  $\text{CDCl}_3$ )  $\delta$  = 171.6, 158.1, 146.6, 143.9, 133.6, 120.9, 114.4, 111.1, 61.5, 56.0, 42.3, 40.2, 32.9, 32.1, 14.2; HRMS ( $\text{ESI}^+$ ): Calculated for  $\text{C}_{15}\text{H}_{23}\text{N}_2\text{O}_5$  ( $[\text{M}+\text{H}]^+$ ): 311.1601. Found: 311.1599.

### 3-[3-(4-Hydroxy-3-methoxyphenyl)propyl]-1-(4-methylbenzenesulfonyl)urea **1m**

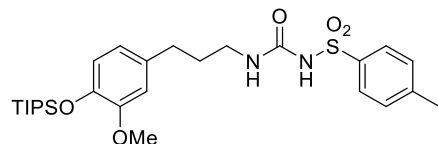

To a solution of the crude amine salt **S5** (827 mg,  $\leq 2.22$  mmol) in  $\text{CH}_2\text{Cl}_2$  (15 mL) at  $0^\circ\text{C}$  was successively added  $\text{Et}_3\text{N}$  (470  $\mu\text{L}$ , 3.37 mmol,  $\geq 1.52$  eq) and *p*-toluenesulfonylisocyanate (370  $\mu\text{L}$ , 2.42 mmol,  $\geq 1.09$  eq). The reaction mixture was stirred for 2 h at rt. Saturated aqueous  $\text{NH}_4\text{Cl}$  (15 mL) and  $\text{H}_2\text{O}$  (10 mL) were added and the phases were separated. The aqueous phase was extracted with  $\text{CH}_2\text{Cl}_2$  ( $2 \times 20$  mL). The organic extracts were washed with Brine

(20 mL), dried over Na<sub>2</sub>SO<sub>4</sub>, filtered and concentrated *in vacuo*. Flash column chromatography (SiO<sub>2</sub>, hexane–EtOAc, 7:3 to 5:5) afforded the desired urea **58** as a colourless oil (554 mg, 1.03 mmol, 47% over two steps). IR ( $\nu_{\max}$  /cm<sup>-1</sup>) 3346, 2942, 2865, 1662, 1544, 1513, 1417, 1342, 1274, 1232, 1159, 1090; <sup>1</sup>H NMR (400 MHz; CDCl<sub>3</sub>)  $\delta$  = 8.51 (1H, br s), 7.76 (2H, d, *J* = 8.3), 7.28 (2H, d, *J* = 8.3), 6.78 (1H, d, *J* = 8.0), 6.62 (1H, d, *J* = 1.9), 6.55 (1H, dd, *J* = 8.0 and 1.9), 3.78 (3H, s), 3.22 (2H, dt, *J* = 7.0, 6.2), 2.50 (2H, app t, *J* = 7.6), 2.41 (3H, s), 1.83 – 1.73 (2H, m), 1.30 – 1.19 (3H, m), 1.09 (18H, d, *J* = 7.2); <sup>13</sup>C NMR (101 MHz; CDCl<sub>3</sub>)  $\delta$  = 151.8, 150.8, 144.8, 143.9, 136.9, 134.7, 130.1, 127.0, 120.4, 120.3, 112.6, 55.6, 39.8, 32.6, 31.3, 21.7, 18.0, 13.0; HRMS (ESI<sup>+</sup>): Calculated for C<sub>27</sub>H<sub>43</sub>N<sub>2</sub>O<sub>5</sub>SSi ([M+H]<sup>+</sup>): 535.2656. Found: 535.2653.

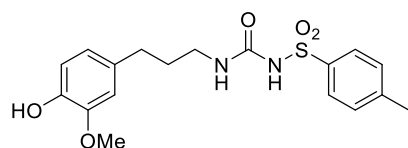

To a solution of the above urea (554 mg, 1.04 mmol) in THF (2 mL) at 0 °C was added *n*Bu<sub>4</sub>NF (1M in THF, 1.2 mL, 1.2 mmol, 1.15 eq) dropwise. The reaction mixture warmed to rt and stirred for 2 h. After concentration *in vacuo* the residue was purified by flash column chromatography (SiO<sub>2</sub>, CH<sub>2</sub>Cl<sub>2</sub> then CH<sub>2</sub>Cl<sub>2</sub>–MeOH, 98:2 to 96:4) to afford the desired phenol as a colourless solid (332 mg, 0.88 mmol, 84%). m.p. (CH<sub>2</sub>Cl<sub>2</sub>) 128.4–129.0 °C; IR ( $\nu_{\max}$  /cm<sup>-1</sup>) 3353, 2937, 2945, 1699, 1598, 1514, 1514, 1451, 1337, 1269, 1233, 1157, 1089; <sup>1</sup>H NMR (400 MHz; CD<sub>3</sub>OD)  $\delta$  = 7.85 (2H, d, *J* = 8.3), 7.36 (2H, d, *J* = 8.3), 6.69 – 6.65 (2H, m), 6.52 (1H, dd, *J* = 8.0 and 1.7), 3.79 (3H, s), 3.08 (2H, t, *J* = 6.9), 2.45 – 2.38 (5H, m includes 2.40, s), 1.68 (2H, app quint, *J* = 7.1); <sup>13</sup>C NMR (101 MHz; CD<sub>3</sub>OD)  $\delta$  = 153.9, 148.8, 145.7, 145.6, 138.7, 134.2, 130.6, 128.5, 121.7, 116.1, 113.0, 56.3, 40.3, 33.4, 32.5, 21.5; HRMS (ESI<sup>+</sup>): Calculated for C<sub>18</sub>H<sub>23</sub>N<sub>2</sub>O<sub>5</sub>S ([M+H]<sup>+</sup>): 379.1322. Found: 379.1313.

### 1-(4-Chlorophenyl)-3-[3-(4-hydroxy-3-methoxyphenyl)propyl]urea **1n**

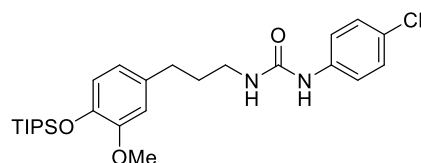

To a solution of the crude amine salt **55** (345 mg, ≤0.925 mmol) in CH<sub>2</sub>Cl<sub>2</sub> (8 mL) at 0 °C was successively added Et<sub>3</sub>N (170 μL, 1.22 mmol, ≥1.32 eq) and 4-chlorophenyl isocyanate (156 mg, 1.02 mmol, ≥1.10 eq). The reaction mixture was stirred overnight at rt. Saturated aqueous NH<sub>4</sub>Cl (10 mL) and H<sub>2</sub>O (10 mL) were added and the phases were separated. The aqueous phase was extracted with CH<sub>2</sub>Cl<sub>2</sub> (2 × 20 mL). The organic extracts were washed with brine (20 mL), dried over Na<sub>2</sub>SO<sub>4</sub>, filtered and concentrated *in vacuo*. Flash column chromatography (SiO<sub>2</sub>, hexane–EtOAc, 8:2 to 7:3) afforded the desired urea **59** as a colourless oil (305 mg, 0.621 mmol, 67% over two steps). IR ( $\nu_{\max}$  /cm<sup>-1</sup>) 3330, 2941, 2865, 1645, 1594, 1552, 1512, 1491, 1272, 1229, 1157; <sup>1</sup>H NMR (400 MHz; CDCl<sub>3</sub>)  $\delta$  = 7.18 (4H, s), 7.09 (1H, s), 6.75 (1H, d, *J* = 8.0), 6.60 (1H, d, *J* = 1.9), 6.54 (1H, dd, *J* = 8.0, 1.9), 5.27 (1H, t, *J*

= 5.6), 3.73 (3H, s), 3.19 (2H, td,  $J = 6.7, 5.6$ ), 2.52 (2H, dd,  $J = 8.0, 7.2$ ), 1.80 – 1.70 (2H, m), 1.29 – 1.17 (3H, m), 1.08 (18H, d,  $J = 7.2$ );  $^{13}\text{C}$  NMR (101 MHz;  $\text{CDCl}_3$ )  $\delta = 156.1, 150.8, 143.8, 137.5, 134.6, 129.1, 128.4, 121.6, 120.3, 120.3, 112.5, 55.6, 40.1, 32.9, 31.9, 18.0, 12.9$ ; HRMS (ESI<sup>+</sup>): Calculated for  $\text{C}_{26}\text{H}_{39}\text{ClN}_2\text{NaO}_3\text{Si}$  ( $[\text{M}+\text{Na}]^+$ ): 513.2310. Found: 513.2311.

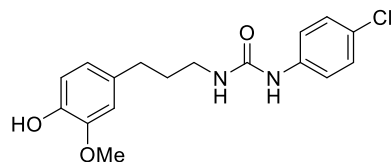

To a solution of the above urea (304 mg, 0.620 mmol) in THF (5 mL) at 0 °C was added  $n\text{Bu}_4\text{NF}$  (1M in THF, 0.70 mL, 0.70 mmol, 1.1 eq) dropwise. The reaction mixture warmed to rt and stirred overnight. After concentration *in vacuo* the residue was purified by flash column chromatography ( $\text{SiO}_2$ ,  $\text{CH}_2\text{Cl}_2$  then  $\text{CH}_2\text{Cl}_2$ -MeOH, 98:2) to afford the desired phenol as a colourless solid (190 mg, 0.569 mmol, 91%). m.p. ( $\text{CH}_2\text{Cl}_2$ -MeOH) 157.6–158.6 °C; IR ( $\nu_{\text{max}}/\text{cm}^{-1}$ ) 3547, 3330, 2936, 2861, 2838, 1630, 1592, 1563, 1514, 1488, 1252, 1242, 1206, 1118, 1033;  $^1\text{H}$  NMR (400 MHz; MeOD)  $\delta = 7.34$  (2H, d,  $J = 8.9$ ), 7.21 (2H, d,  $J = 8.9$ ), 6.77 (1H, d,  $J = 1.8$ ), 6.70 (1H, d,  $J = 8.0$ ), 6.63 (1H, dd,  $J = 8.0, 1.8$ ), 3.82 (3H, s), 3.19 (2H, t,  $J = 7.0$ ), 2.58 (2H, dd,  $J = 8.2, 7.1$ ), 1.80 (2H, app dq,  $J = 8.6, 7.2$ );  $^{13}\text{C}$  NMR (101 MHz; MeOD)  $\delta = 158.0, 148.9, 145.6, 139.9, 134.5, 129.6, 128.0, 121.7, 121.3, 116.1, 113.1, 56.3, 40.3, 33.6, 33.1$ ; HRMS (ESI<sup>+</sup>): Calculated for  $\text{C}_{17}\text{H}_{20}\text{ClN}_2\text{O}_3$  ( $[\text{M}+\text{H}]^+$ ): 335.1156. Found: 335.1154.

#### Preparation of naphthol-derived substrates 1o-r

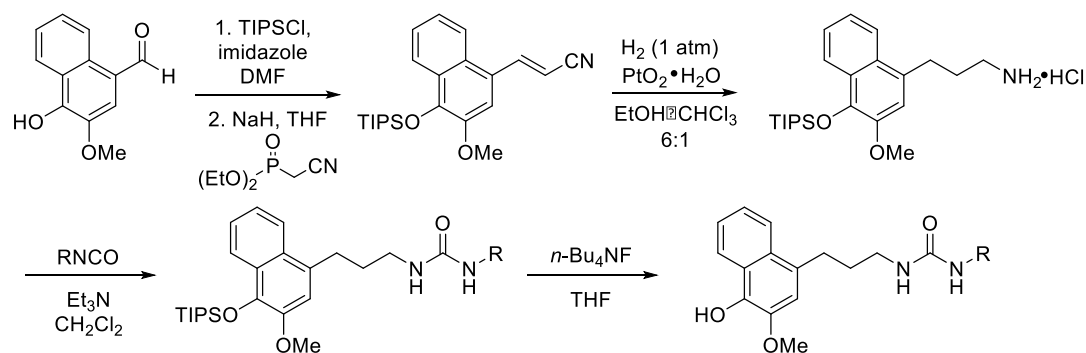

#### 4-[[Tris(propan-2-yl)silyl]oxy]naphthalene-1-carbaldehyde S10

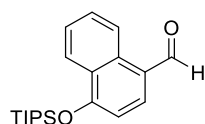

4-Hydroxy-1-naphthaldehyde (3.00 g, 17.4 mmol) was dissolved in DMF (9 mL). Triisopropylsilyl chloride (4.5 mL, 21.0 mmol, 1.21 eq) was added and the reaction mixture was cooled down to 0 °C before the addition of imidazole (1.42 g, 20.9 mmol, 1.20 eq). The reaction mixture was warmed to rt and stirred overnight. EtOAc (150 mL) and  $\text{H}_2\text{O}$  (50 mL) were added. The phases were separated and the organic phase was successively washed

with H<sub>2</sub>O (2 × 50 mL), aqueous HCl (1M, 50 mL), aqueous saturated NaHCO<sub>3</sub> (50 mL) and Brine (100 mL). The organic phase was then dried over Na<sub>2</sub>SO<sub>4</sub>, filtered and concentrated *in vacuo*. Flash column chromatography (SiO<sub>2</sub>, hexane–EtOAc, 95:5) gave the title compound (5.43 g, 16.5 mmol, 95%) as a colourless oil. IR ( $\nu_{\max}$  /cm<sup>-1</sup>) 2938, 2863, 2732, 1616, 1566, 1507, 1460, 1428, 1393, 1166, 1055; <sup>1</sup>H NMR (400 MHz; CDCl<sub>3</sub>)  $\delta$  = 10.2 (1H, s), 9.33 (1H, d, *J* = 8.5), 8.36 (1H, d, *J* = 8.4), 7.86 (1H, d, *J* = 7.9), 7.70 (1H, ddd, *J* = 8.4, 7.3, 0.9), 7.59 (1H, ddd, *J* = 8.5, 7.3, 0.9), 6.97 (1H, d, *J* = 7.9), 1.47 (3H, sept, *J* = 7.5), 1.47 (18H, d, *J* = 7.5); <sup>13</sup>C NMR (101 MHz; CDCl<sub>3</sub>)  $\delta$  = 192.2, 158.5, 139.3, 132.7, 129.5, 127.7, 126.4, 125.2, 125.0, 123.1, 111.1, 18.1, 13.2; HRMS (ESI<sup>+</sup>): Calculated for C<sub>20</sub>H<sub>29</sub>O<sub>2</sub>Si ([M+H]<sup>+</sup>): 329.1931. Found: 329.1928.

### (2E/2Z)-3-(4-{{Tris(propan-2-yl)silyl}oxy)naphthalen-1-yl}prop-2-enitrile S11

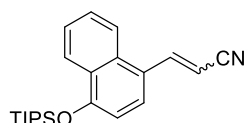

Following a procedure adapted from Pouységu *et al.*,<sup>2</sup> to a solution of THF (26 mL) at 0 °C was added NaH (60% in mineral oil, 475 mg, 11.8 mmol, 1.15 eq) portionwise and the suspension was stirred for 10 min. Diethylcyanophosphonate (2.0 mL, 12 mmol, 1.16 eq) was added dropwise at 0 °C and the reaction mixture was stirred 10 min before the addition of the above aldehyde **S10** (3.38 g, 10.3 mmol) in THF (8 mL). The reaction mixture was stirred for 7 h at 0 °C, and Et<sub>2</sub>O was added (100 mL) before filtration of the reaction mixture directly over a pad of silica washed with Et<sub>2</sub>O. After concentration *in vacuo*, the residue was purified by flash column chromatography (SiO<sub>2</sub>, hexane–EtOAc, 95:5 to 9:1) to give the desired nitriles as an inseparable mixture of isomers (2.27 g, 6.47 mmol, 63%, *E/Z* 5.3:1). IR ( $\nu_{\max}$  /cm<sup>-1</sup>) 2943, 2865, 2214, 1509, 1458, 1427, 1369, 1264, 1218, 1068; **Major isomer peaks reported only** <sup>1</sup>H NMR (400 MHz, CDCl<sub>3</sub>)  $\delta$  = 8.21 (1H, dd, *J* = 8.2, 1.1), 8.03 (1H, d, *J* = 16.4), 7.89 (1H, d, *J* = 8.2), 7.50 – 7.39 (3H, m), 6.75 (1H, d, *J* = 8.2), 5.72 (1H, d, *J* = 16.4), 1.36 – 1.25 (3H, m), 1.04 (18H, d, *J* = 7.5); <sup>13</sup>C NMR (101 MHz, CDCl<sub>3</sub>)  $\delta$  = 155.6, 147.6, 132.5, 127.9, 127.8, 125.9, 125.8, 123.7, 123.6, 122.7, 119.1, 111.9, 95.8, 18.2, 13.2; HRMS (ESI<sup>+</sup>): Calculated for C<sub>22</sub>H<sub>30</sub>NOSi ([M+H]<sup>+</sup>): 352.2091. Found: 352.2085.

### Amine salt S12

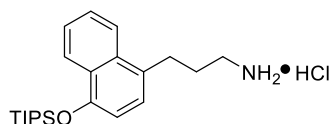

Following a procedure adapted from Pouységu *et al.*,<sup>2</sup> to a mixture of EtOH–CHCl<sub>3</sub> (6:1, 56 mL) was added the unsaturated nitrile **S11** (4.02 g, 12.1 mmol). PtO<sub>2</sub>·H<sub>2</sub>O (200 mg, 0.816 mmol, 0.067 eq) was added and the reaction mixture was stirred under an atmosphere of H<sub>2</sub> (balloon) overnight. MeOH (100 mL) was added and the stirring was stopped. After 30 min the reaction mixture was removed from the reaction flask without the solid platinum residue. After concentration *in vacuo* the amine salt was used directly without further purification.

### 3-Cyclopropyl-1-[3-(4-hydroxynaphthalen-1-yl)propyl]urea **1o**

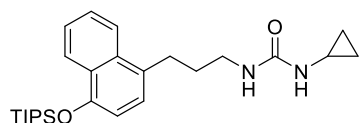

To a solution of the crude amine salt **S12** (400 mg,  $\leq 1.01$  mmol) in  $\text{CH}_2\text{Cl}_2$  (10 mL) at  $0^\circ\text{C}$  was successively added  $\text{Et}_3\text{N}$  (150  $\mu\text{L}$ , 1.07 mmol,  $\geq 1.06$  eq) and cyclopropyl isocyanate (95  $\mu\text{L}$ , 1.12 mmol,  $\geq 1.11$  eq). The reaction mixture was stirred for 2 h at rt. Saturated aqueous  $\text{NH}_4\text{Cl}$  (15 mL) and  $\text{H}_2\text{O}$  (10 mL) were added and the phases were separated. The aqueous phase was extracted with  $\text{CH}_2\text{Cl}_2$  (2  $\times$  20 mL). The organic extracts were washed with brine (20 mL), dried over  $\text{Na}_2\text{SO}_4$ , filtered and concentrated *in vacuo*. Flash column chromatography ( $\text{SiO}_2$ , hexane–EtOAc, 5:5) afforded the desired urea **S13** as a colourless solid (317 mg, 0.714 mmol, 71% over two steps). mp (hexane–EtOAc):  $92\text{--}93^\circ\text{C}$ ; IR ( $\nu_{\text{max}}/\text{cm}^{-1}$ ) 2945, 2867, 1632, 1584, 1461, 1392, 1273, 1157, 1069;  $^1\text{H}$  NMR (400 MHz,  $\text{CDCl}_3$ )  $\delta$  = 8.31 (1H, dd,  $J$  = 7.9, 1.5), 7.95 (1H, d,  $J$  = 8.5), 7.53 – 7.44 (2H, m), 7.15 (1H, d,  $J$  = 7.7), 6.79 (1H, d,  $J$  = 7.7), 4.93 (1H, br s), 4.60 (1H, s), 3.36 (2H, dd,  $J$  = 13.1, 6.8), 3.05 (2H, t,  $J$  = 7.5), 2.34 – 2.27 (1H, m), 2.03 – 1.94 (2H, m), 1.47 – 1.35 (3H, m), 1.15 (18H, d,  $J$  = 7.4, 6  $\times$  TIPS- $\text{H}_3$ ), 0.69 – 0.64 (2H, m), 0.54 – 0.49 (2H, m);  $^{13}\text{C}$  NMR (101 MHz,  $\text{CDCl}_3$ )  $\delta$  = 159.1, 150.9, 133.0, 129.9, 128.1, 126.2, 126.0, 124.8, 123.7, 123.6, 111.4, 40.3, 31.4, 30.1, 22.4, 18.2, 13.2, 7.6; HRMS ( $\text{ESI}^+$ ): Calculated for  $\text{C}_{26}\text{H}_{41}\text{N}_2\text{O}_2\text{Si}$  ( $[\text{M}+\text{H}]^+$ ): 441.2931. Found: 441.2931.

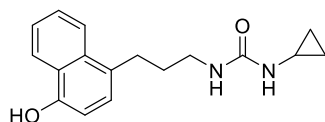

To a solution of the above urea **S13** (153 mg, 0.348 mmol) in THF (2 mL) at  $0^\circ\text{C}$  was added  $n\text{Bu}_4\text{NF}$  (1M in THF, 370  $\mu\text{L}$ , 0.370 mmol, 1.06 eq) dropwise. The reaction mixture warmed to rt and stirred for 2 h. After concentration *in vacuo* the residue was purified by flash column chromatography ( $\text{SiO}_2$ ,  $\text{CH}_2\text{Cl}_2$ –MeOH, 98:2 to 96:4) to afford the desired phenol as a colourless solid (76 mg, 0.267 mmol, 77%). mp ( $\text{CH}_2\text{Cl}_2$ –MeOH):  $167\text{--}169^\circ\text{C}$ ; IR ( $\nu_{\text{max}}/\text{cm}^{-1}$ ) 3434, 3280, 3126, 2932, 1643, 1620, 1543, 1515, 1457, 1333, 1280, 1249, 1138;  $^1\text{H}$  NMR (400 MHz; MeOD)  $\delta$  = 8.22 (1H, d,  $J$  = 8.1), 7.95 (1H, d,  $J$  = 8.3), 7.49 – 7.43 (1H, m), 7.43 – 7.37 (1H, m), 7.12 (1H, d,  $J$  = 7.6), 6.73 (1H, d,  $J$  = 7.6), 3.23 (2H, t,  $J$  = 6.6), 2.99 (2H, t,  $J$  = 7.5), 2.44 – 2.36 (1H, m), 1.87 (2H, app quint,  $J$  = 6.7), 0.66 (2H, app q,  $J$  = 5.8), 0.47 – 0.40 (2H, m);  $^{13}\text{C}$  NMR (101 MHz; MeOD)  $\delta$  = 162.1, 153.1, 134.0, 129.7, 127.1, 126.9, 126.8, 125.1, 124.5, 123.8, 108.4, 40.9, 32.6, 30.8, 23.1, 7.4; HRMS ( $\text{ESI}^+$ ): Calculated for  $\text{C}_{17}\text{H}_{21}\text{N}_2\text{O}_2$  ( $[\text{M}+\text{H}]^+$ ): 285.1597. Found: 285.1594.

### Ethyl 2-([3-(4-(TIPSO)naphthalen-1-yl)propyl]carbamoyl)amino)acetate **1p**

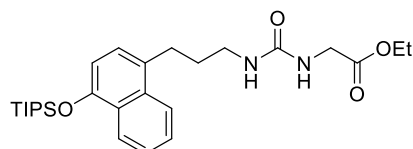

To a solution of the crude amine salt (599 mg,  $\leq 1.52$  mmol) in  $\text{CH}_2\text{Cl}_2$  (20 mL) at 0 °C was successively added  $\text{Et}_3\text{N}$  (300  $\mu\text{L}$ , 2.15 mmol,  $\geq 1.41$  eq) and ethyl isocyanatoacetate (175  $\mu\text{L}$ , 1.56 mmol,  $\geq 1.02$  eq). The reaction mixture was stirred for 2 h at rt. Saturated aqueous  $\text{NH}_4\text{Cl}$  (15 mL) and  $\text{H}_2\text{O}$  (10 mL) were added and the phases were separated. The aqueous phase was extracted with  $\text{CH}_2\text{Cl}_2$  (2  $\times$  20 mL). The organic extracts were washed with brine (20 mL), dried over  $\text{Na}_2\text{SO}_4$ , filtered and concentrated *in vacuo*. Flash column chromatography ( $\text{SiO}_2$ , hexane–EtOAc, 6:4 to 5:5) afforded the desired urea **S14** as a colourless oil (246 mg, 0.50 mmol, 32% over two steps). IR ( $\nu_{\text{max}}/\text{cm}^{-1}$ ) 3350, 2944, 2866, 2247, 1743, 1634, 1573, 1460, 1391, 1273, 1197, 1156, 1068;  $^1\text{H}$  NMR (400 MHz;  $\text{CDCl}_3$ )  $\delta$  = 8.32 – 8.29 (1H, m), 7.92 (1H, dd,  $J$  = 7.1, 2.3), 7.50 – 7.42 (2H, m), 7.11 (1H, d,  $J$  = 7.8), 6.77 (1H, d,  $J$  = 7.8), 5.44 (1H, t,  $J$  = 5.3), 5.28 (1H, t,  $J$  = 5.5), 4.12 (2H, q,  $J$  = 7.1), 3.97 (2H, d,  $J$  = 5.5), 3.29 – 3.24 (2H, m), 3.02 – 2.96 (2H, m), 1.95 – 1.86 (2H, m), 1.46 – 1.34 (3H, m), 1.21 (3H, t,  $J$  = 7.1), 1.15 (18H, d,  $J$  = 7.5);  $^{13}\text{C}$  NMR (101 MHz,  $\text{CDCl}_3$ )  $\delta$  = 171.6, 158.4, 150.7, 133.0, 129.9, 128.0, 126.1, 125.8, 124.7, 123.7, 123.4, 111.4, 61.3, 42.3, 40.4, 31.1, 29.8, 18.2, 14.1, 13.1; HRMS ( $\text{ESI}^+$ ): Calculated for  $\text{C}_{27}\text{H}_{43}\text{N}_2\text{O}_4\text{Si}$  ( $[\text{M}+\text{H}]^+$ ): 487.2986. Found: 487.2984.

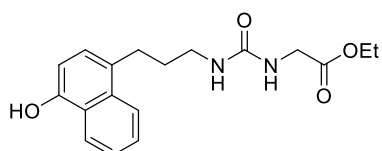

To a solution of the above urea **S14** (246 mg, 0.50 mmol) in THF (10 mL) at 0 °C was added  $n\text{Bu}_4\text{NF}$  (1M in THF, 600  $\mu\text{L}$ , 0.600 mmol, 1.1 eq) dropwise. The reaction mixture warmed to rt and stirred for 2 h. After concentration *in vacuo* the residue was purified by flash column chromatography ( $\text{SiO}_2$ , EtOAc then  $\text{CH}_2\text{Cl}_2$ –MeOH, 97:3) to afford the desired phenol as a colourless oil (145 mg, 0.44 mmol, 88%). IR ( $\nu_{\text{max}}/\text{cm}^{-1}$ ) 3410, 2950, 2821, 1850, 1635, 1515, 1377, 1460, 1353, 1201, 1151;  $^1\text{H}$  NMR (300 MHz; MeOD)  $\delta$  = 8.22 (1H, dd,  $J$  = 8.3, 1.0), 7.97 (1H, d,  $J$  = 8.4), 7.47 (1H, ddd,  $J$  = 8.4, 6.8, 1.5), 7.39 (1H, ddd,  $J$  = 8.1, 6.8, 1.3), 7.13 (1H, d,  $J$  = 7.7), 6.73 (1H, d,  $J$  = 7.7), 4.17 (2H, q,  $J$  = 7.1), 3.87 (2H, s), 3.21 (2H, t,  $J$  = 6.9), 3.00 (2H, dd,  $J$  = 8.7, 6.9), 1.86 (2H, dq,  $J$  = 8.7, 6.9), 1.25 (3H, t,  $J$  = 7.1);  $^{13}\text{C}$  NMR (75 MHz; MeOD)  $\delta$  = 172.7, 161.1, 153.0, 134.1, 129.7, 127.2, 126.9, 126.8, 125.1, 124.6, 123.8, 108.4, 62.0, 42.8, 40.9, 32.6, 30.7, 14.4; HRMS ( $\text{ESI}^+$ ): Calculated for  $\text{C}_{18}\text{H}_{23}\text{N}_2\text{O}_4$  ( $[\text{M}+\text{H}]^+$ ): 331.1652. Found: 331.1647.

#### 1-(4-Chlorophenyl)-3-[3-(4-hydroxynaphthalen-1-yl)propyl]urea **1q**

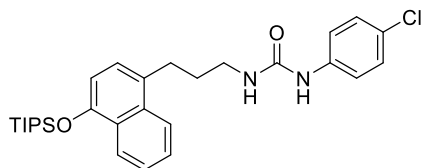

To a solution of the crude amine salt (361 mg,  $\leq 0.916$  mmol) in  $\text{CH}_2\text{Cl}_2$  (10 mL) at 0 °C was successively added  $\text{Et}_3\text{N}$  (150  $\mu\text{L}$ , 1.07 mmol,  $\geq 1.17$  eq) and 4-chlorophenyl isocyanate (155

mg, 1.01 mmol,  $\geq 1.10$  eq). The reaction mixture was stirred for 2 h at rt. Saturated aqueous  $\text{NH}_4\text{Cl}$  (15 mL) and  $\text{H}_2\text{O}$  (10 mL) were added and the phases were separated. The aqueous phase was extracted with  $\text{CH}_2\text{Cl}_2$  (2  $\times$  20 mL). The organic extracts were washed with brine (20 mL), dried over  $\text{Na}_2\text{SO}_4$ , filtered and concentrated *in vacuo*. Flash column chromatography ( $\text{SiO}_2$ , hexane–EtOAc, 7:3) followed by crystallisation with  $\text{CH}_2\text{Cl}_2$  afforded the desired urea **S15** as a colourless solid (243 mg, 0.476 mmol, 52% over two steps). m.p. ( $\text{CH}_2\text{Cl}_2$ ): 135–136 °C; IR ( $\nu_{\text{max}}/\text{cm}^{-1}$ ) 2942, 2865, 1646, 1590, 1552, 1491, 1462, 1393, 1276, 1237, 1091;  $^1\text{H}$  NMR (400 MHz,  $\text{CDCl}_3$ )  $\delta$  = 8.33 – 8.29 (1H, m), 7.91 – 7.87 (1H, m), 7.49 – 7.42 (2H, m), 7.21 (2H, d,  $J$  = 8.9), 7.16 (2H, d,  $J$  = 8.9), 7.09 (1H, d,  $J$  = 7.7), 6.76 (1H, d,  $J$  = 7.7), 6.49 (1H, br s), 4.85 (1H, app t,  $J$  = 5.5), 3.34 – 3.27 (2H, m), 3.00 (2H, app t,  $J$  = 7.5), 1.97 – 1.88 (2H, m), 1.46 – 1.34 (3H, m), 1.14 (18H, d,  $J$  = 7.5);  $^{13}\text{C}$  NMR (101 MHz,  $\text{CDCl}_3$ )  $\delta$  = 155.7, 150.9, 137.3, 133.0, 129.6, 129.3, 128.8, 128.1, 126.2, 126.0, 124.9, 123.6, 123.6, 122.0, 111.4, 40.4, 30.9, 30.0, 18.2, 13.2; HRMS (ESI $^+$ ): Calculated for  $\text{C}_{29}\text{H}_{39}\text{N}_2^{35}\text{ClNaO}_2\text{Si}$  ( $[\text{M}+\text{Na}]^+$ ): 533.2361. Found: 533.2359.

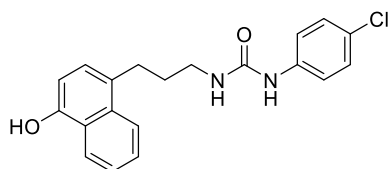

To a solution of the above urea **S15** (239 mg, 0.460 mmol) in THF (2 mL) at 0 °C was added  $n\text{Bu}_4\text{NF}$  (1M in THF, 540  $\mu\text{L}$ , 0.54 mmol, 1.17 eq) dropwise. The reaction mixture warmed to rt and stirred for 2 h. After concentration *in vacuo* the residue was purified by flash column chromatography ( $\text{SiO}_2$ , hexane–EtOAc, 6:4 to 5:5) to afford the desired phenol as a colourless solid (105 mg, 0.297 mmol, 65%). mp (hexane–EtOAc): 170–171 °C; IR ( $\nu_{\text{max}}/\text{cm}^{-1}$ ) 3334, 3287, 2936, 2861, 1632, 1589, 1565, 1490, 1381, 1352, 1280, 1224, 1120;  $^1\text{H}$  NMR (400 MHz, MeOD)  $\delta$  = 8.22 (1H, d,  $J$  = 8.2), 7.96 (1H, d,  $J$  = 8.3), 7.49 – 7.43 (1H, m), 7.42 – 7.37 (1H, m), 7.34 (2H, d,  $J$  = 8.7), 7.21 (2H, d,  $J$  = 8.7), 7.13 (1H, d,  $J$  = 7.6), 6.73 (1H, d,  $J$  = 7.6), 3.26 (2H, t,  $J$  = 6.9), 3.02 (2H, t,  $J$  = 7.6), 1.90 (2H, tt,  $J$  = 7.6, 6.9);  $^{13}\text{C}$  NMR (101 MHz, MeOD)  $\delta$  = 158.1, 153.1, 139.9, 134.0, 129.6, 129.5, 128.0, 127.2, 126.9, 126.8, 125.1, 124.5, 123.8, 121.3, 108.4, 40.7, 32.4, 30.7; HRMS (ESI $^+$ ): Calculated for  $\text{C}_{20}\text{H}_{20}^{35}\text{ClN}_2\text{O}_2$  ( $[\text{M}+\text{H}]^+$ ): 355.1207. Found: 355.1204.

### 3-[3-(4-Hydroxynaphthalen-1-yl)propyl]-1-(4-methylbenzenesulfonyl)urea 1r

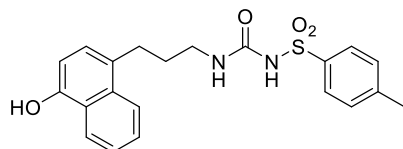

To a solution of the crude amine salt (430 mg,  $\leq 1.09$  mmol) in  $\text{CH}_2\text{Cl}_2$  (10 mL) at 0 °C was successively added  $\text{Et}_3\text{N}$  (160  $\mu\text{L}$ , 1.15 mmol,  $\geq 1.05$  eq) and *p*-toluenesulfonyl isocyanate (185  $\mu\text{L}$ , 1.21 mmol,  $\geq 1.11$  eq). The reaction mixture was stirred for 2 h at rt. Saturated aqueous  $\text{NH}_4\text{Cl}$  (15 mL) and  $\text{H}_2\text{O}$  (10 mL) were added and the phases were separated. The aqueous phase was extracted with  $\text{CH}_2\text{Cl}_2$  (2  $\times$  20 mL). The organic extracts were washed



with brine (20 mL), dried over  $\text{Na}_2\text{SO}_4$ , filtered and concentrated *in vacuo*. Flash column chromatography ( $\text{SiO}_2$ , hexane–EtOAc, 8:2) afforded an amorphous solid (416 mg,  $\leq 0.752$  mmol) that was used straight without further purification. The solid was dissolved in THF (4 mL) and  $n\text{Bu}_4\text{NF}$  (1M in THF, 840  $\mu\text{L}$ , 0.840 mmol,  $\geq 1.12$  eq) was added dropwise at 0 °C. The reaction mixture warmed to rt and stirred overnight. After concentration *in vacuo* the residue was purified by flash column chromatography ( $\text{SiO}_2$ ,  $\text{CH}_2\text{Cl}_2$  then  $\text{CH}_2\text{Cl}_2$ –MeOH, 98:2) to afford the desired phenol as a colourless solid (258 mg, 0.648 mmol, 59%, 3 steps). m.p. (hexane–EtOAc) 144.0–144.4 °C; IR ( $\nu_{\text{max}}/\text{cm}^{-1}$ ) 3310, 2958, 2884, 1670, 1588, 1542, 1380, 1276, 1245, 1186, 1160, 1052;  $^1\text{H}$  NMR (400 MHz, MeOD)  $\delta$  = 8.21 (1H, dd,  $J$  = 7.9, 1.5), 7.86 – 7.80 (3H, m including d,  $J$  = 8.1 at 7.84), 7.45 – 7.36 (2H, m), 7.30 (2H, d,  $J$  = 8.1), 7.01 (1H, d,  $J$  = 7.7), 6.70 (1H, d,  $J$  = 7.7), 3.17 (2H, t,  $J$  = 6.8), 2.86 – 2.80 (2H, m), 2.31 (3H, s), 1.81 – 1.73 (2H, m);  $^{13}\text{C}$  NMR (101 MHz, MeOD)  $\delta$  = 154.2, 153.1, 145.6, 138.7, 134.0, 130.6, 129.3, 128.4, 127.0, 126.9, 126.7, 125.1, 124.4, 123.8, 108.3, 40.7, 31.8, 30.4, 21.4; HRMS (ESI $^+$ ): Calculated for  $\text{C}_{21}\text{H}_{23}\text{N}_2\text{O}_4\text{S}$  ( $[\text{M}+\text{H}]^+$ ): 399.1373. Found: 399.1369.

### Preparation of the tetrahydroquinoliny urea 1s

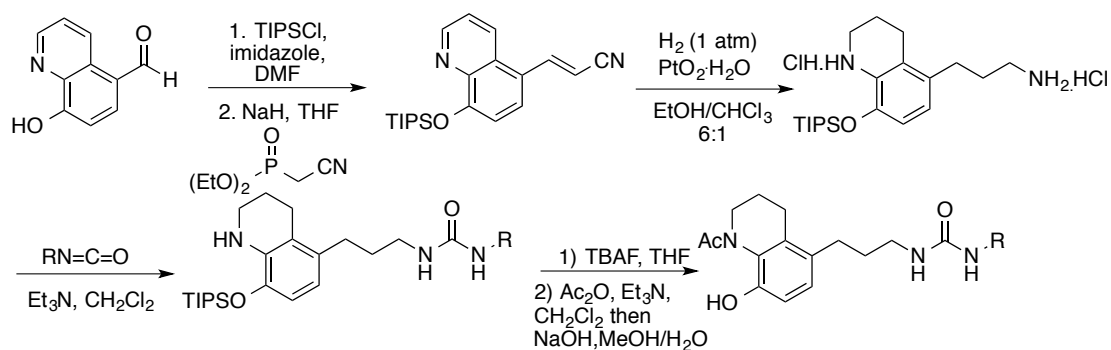

### 8-[[Tris(propan-2-yl)silyl]oxy]quinoline-5-carbaldehyde S16

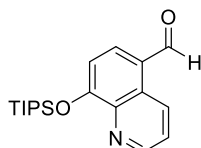

8-Hydroxyquinoline-5-carbaldehyde (250 mg, 1.44 mmol) was dissolved in DMF (2 mL). Triisopropylsilyl chloride (370  $\mu\text{L}$ , 1.73 mmol, 1.20 eq) was added and the reaction mixture was cooled down to 0 °C before the addition of imidazole (118 mg, 1.73 mmol, 1.20 eq). The reaction mixture was warmed to rt and stirred overnight. More triisopropylsilyl chloride (1.2 eq) and imidazole (1.2 eq) were added and the reaction mixture was stirred for 24 h. EtOAc (30 mL) and  $\text{H}_2\text{O}$  (10 mL) were added. The phases were separated and the organic phase was successively washed with  $\text{H}_2\text{O}$  ( $2 \times 10$  mL), aqueous HCl (1M, 10 mL), aqueous saturated  $\text{NaHCO}_3$  (10 mL) and brine (20 mL). The organic phase was then dried over  $\text{Na}_2\text{SO}_4$ , filtered and concentrated *in vacuo*. Flash column chromatography ( $\text{SiO}_2$ , hexane–EtOAc, 9:1) gave the title compound (353 mg, 1.07 mmol, 74%) as a colourless oil. IR ( $\nu_{\text{max}}/\text{cm}^{-1}$ ) 2942, 2891, 2864, 2723, 1684, 1600, 1560, 1500, 1474, 1377, 1319, 1249, 1169, 1089;  $^1\text{H}$  NMR (400 MHz,  $\text{CDCl}_3$ )  $\delta$  = 10.15 (1H, s), 9.65 (1H, dd,  $J$  = 8.6, 1.7), 8.90 (1H, dd,  $J$  = 4.1, 1.7), 7.93 (1H, d,  $J$  =

8.0), 7.56 (1H, dd,  $J = 8.6, 4.1$ ), 7.26 (1H, d,  $J = 8.0$ ), 1.51 – 1.40 (3H, m), 1.12 (18H, d,  $J = 7.5$ );  $^{13}\text{C}$  NMR (101 MHz,  $\text{CDCl}_3$ )  $\delta = 192.0, 159.5, 149.1, 141.4, 139.7, 133.6, 127.9, 124.6, 124.0, 115.9, 18.2, 13.9$ ; HRMS (ESI $^+$ ): Calculated for  $\text{C}_{19}\text{H}_{28}\text{NO}_2\text{Si}$  ( $[\text{M}+\text{H}]^+$ ): 330.1883. Found: 330.1881.

**(2E/Z)-3-(8-{{Tris(propan-2-yl)silyl}oxy}quinolin-5-yl)prop-2-enenitrile S17**

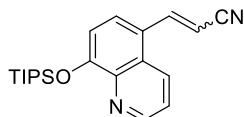

Following a procedure adapted from Pouységu *et al.*,<sup>2</sup> to a solution of THF (4 mL) at 0 °C was added NaH (60% in mineral oil, 50 mg, 1.25 mmol, 1.17 eq) portionwise and the suspension was stirred for 10 min. Diethylcyanophosphonate (220  $\mu\text{L}$ , 1.36 mmol, 1.27 eq) was added dropwise at 0 °C and the reaction mixture was stirred 10 min before the addition of aldehyde **S16** (352 mg, 1.07 mmol) in THF (2 mL). The reaction mixture was stirred for 7 h at 0 °C, and  $\text{Et}_2\text{O}$  was added (20 mL) before the reaction mixture was filtered directly over a pad of silica washed with  $\text{Et}_2\text{O}$ . After concentration *in vacuo* the residue was purified by flash column chromatography (hexane– $\text{EtOAc}$ , 95:5) to provide the desired nitriles as a (Z/E, 1:5) mixture of diastereomers (328 mg, 0.934 mmol, 87%). For characterization purposes the isomers could be separated.

IR ( $\nu_{\text{max}}$  / $\text{cm}^{-1}$ ) 2942, 2864, 2214, 1612, 1564, 1470, 1400, 1387, 1313, 1269, 1091; **Major E isomer**  $^1\text{H}$  NMR (400 MHz,  $\text{CDCl}_3$ )  $\delta = 8.90$  (1H, dd,  $J = 4.0, 1.3$ ), 8.35 (1H, dd,  $J = 8.6, 1.3$ ), 8.06 (1H, d,  $J = 16.3$ ), 7.69 (1H, d,  $J = 8.2$ ), 7.49 (1H, dd,  $J = 8.6, 4.0$ ), 7.19 (1H, d,  $J = 8.2$ ), 5.89 (1H, d,  $J = 16.3$ ), 1.49 – 1.37 (3H, m), 1.12 (19 H, d,  $J = 7.5$ );  $^{13}\text{C}$  NMR (101 MHz,  $\text{CDCl}_3$ )  $\delta = 156.5, 148.9, 146.0, 141.7, 130.8, 127.4, 126.2, 122.8, 122.3, 118.7, 117.0, 96.3, 18.2, 13.7$ ; **Minor Z isomer**  $^1\text{H}$  NMR (400 MHz,  $\text{CDCl}_3$ )  $\delta = 8.91$  (1H, dd,  $J = 4.1, 1.5$ ), 8.25 (1H, dd,  $J = 8.6, 1.5$ ), 8.20 (1H, d,  $J = 8.2$ ), 7.77 (1H, d,  $J = 11.8$ ), 7.47 (1H, dd,  $J = 8.6, 4.1$ ), 7.25 (1H, d,  $J = 8.2$ ), 5.59 (1H, d,  $J = 11.9$ ), 1.51 – 1.39 (3H, m), 1.13 (18H, d,  $J = 7.5$ );  $^{13}\text{C}$  NMR (101 MHz,  $\text{CDCl}_3$ )  $\delta = 156.0, 148.7, 144.8, 141.8, 131.0, 128.4, 127.9, 122.6, 122.1, 117.6, 116.8, 96.1, 18.2, 13.7$ ; HRMS (ESI $^+$ ): Calculated for  $\text{C}_{21}\text{H}_{28}\text{N}_2\text{NaOSi}$  ( $[\text{M}+\text{H}]^+$ ): 375.1863. Found: 375.1856.

**Amine salt S18**

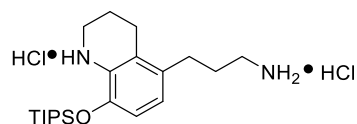

Following a procedure adapted from Pouységu *et al.*,<sup>2</sup> to a mixture of  $\text{EtOH}-\text{CHCl}_3$  (6:1, 7 mL) was added unsaturated nitrile (328 mg, 0.932 mmol).  $\text{PtO}_2 \cdot \text{H}_2\text{O}$  (15 mg, 0.066 mmol, 0.07 eq) was added and the reaction mixture was stirred under an atmosphere of  $\text{H}_2$  (balloon) overnight. MeOH (50 mL) was added and the stirring was stopped. After 30 min the reaction mixture was removed from the reaction flask without the solid platinum residue. After concentration *in vacuo* the amine salt **S18** was used directly without further purification.

**3-Cyclopropyl-1-[3-(8-{{tris(propan-2-yl)silyl}oxy)-1,2,3,4-tetrahydroquinolin-5-yl)propyl]urea S19**

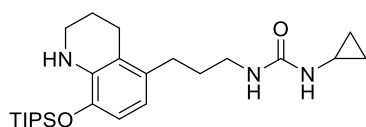

To a solution of the crude amine salt ( $\leq 0.932$  mmol) in  $\text{CH}_2\text{Cl}_2$  (5 mL) at  $0^\circ\text{C}$  was successively added  $\text{Et}_3\text{N}$  (390  $\mu\text{L}$ , 2.78 mmol,  $\geq 2.98$  eq) and cyclopropyl isocyanate (83  $\mu\text{L}$ , 0.98 mmol,  $\geq 1.05$  eq). The reaction mixture was stirred for 2 h at rt. Saturated aqueous  $\text{NaHCO}_3$  (10 mL) and  $\text{H}_2\text{O}$  (10 mL) were added and the phases were separated. The aqueous phase was extracted with  $\text{CH}_2\text{Cl}_2$  ( $2 \times 10$  mL). The organic extracts were washed with brine (10 mL), dried over  $\text{Na}_2\text{SO}_4$ , filtered and concentrated *in vacuo*. Flash column chromatography ( $\text{SiO}_2$ , hexane–EtOAc, 5:5 2:8) provided the desired urea as a colourless oil (186 mg, 0.418 mmol, 45% over two steps). IR ( $\nu_{\text{max}}/\text{cm}^{-1}$ ) 3330, 2941, 2865, 1633, 1566, 1501, 1433, 1258, 1194;  $^1\text{H}$  NMR (400 MHz;  $\text{CDCl}_3$ )  $\delta$  = 6.51 (1H, d,  $J$  = 8.1), 6.29 (1H, d,  $J$  = 8.1), 4.98 (1H, t,  $J$  = 5.2), 4.81 (1H, s), 4.22 (1H, s), 3.32 – 3.26 (4H, m), 2.68 (2H, t,  $J$  = 6.5), 2.51 (2H, dd,  $J$  = 8.3, 7.0), 2.39 – 2.32 (1H, m), 1.99 – 1.91 (2H, m), 1.77 (2H, app dq,  $J$  = 8.6, 7.1), 1.34 – 1.22 (3H, m), 1.10 (18H, d,  $J$  = 7.4), 0.68 (2H, td,  $J$  = 6.7, 4.7), 0.54 – 0.49 (2H, m);  $^{13}\text{C}$  NMR (101 MHz;  $\text{CDCl}_3$ )  $\delta$  = 159.2, 140.6, 136.6, 132.5, 119.6, 115.8, 114.4, 41.2, 40.3, 30.8, 30.0, 23.9, 22.4, 22.4, 18.1, 13.0, 7.5; HRMS (ESI $^+$ ): Calculated for  $\text{C}_{25}\text{H}_{43}\text{N}_3\text{O}_2\text{Si}$  ( $[\text{M}+\text{H}]^+$ ): 446.3197. Found: 446.3205.

### 1-[3-(1-Acetyl-8-hydroxy-1,2,3,4-tetrahydroquinolin-5-yl)propyl]-3-cyclopropylurea **1s**

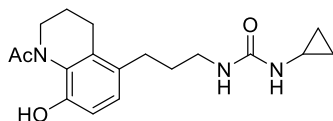

To a solution of the urea **S19** (140 mg, 0.314 mmol) in THF (2 mL) at  $0^\circ\text{C}$  was added  $n\text{Bu}_4\text{NF}$  (1M in THF, 350  $\mu\text{L}$ , 0.350 mmol, 1.11 eq) dropwise. The reaction mixture warmed to rt and stirred for 15 min. After concentration *in vacuo* the residue was purified by flash column chromatography ( $\text{SiO}_2$ , hexane–EtOAc, 1:9 then 0:10 then EtOAc–MeOH 97:3) to afford the desired phenol as a colourless oil (74 mg, 0.256 mmol, 82%). The compound was diluted in  $\text{CH}_2\text{Cl}_2$  (2 mL) and the solution was cooled to  $0^\circ\text{C}$ .  $\text{Et}_3\text{N}$  (79  $\mu\text{L}$ , 0.566 mmol, 2.21 eq) and acetic anhydride (54  $\mu\text{L}$ , 0.571 mmol, 2.23 eq) were successively added. The reaction mixture was stirred at rt overnight. Saturated aqueous  $\text{NH}_4\text{Cl}$  (20 mL) and  $\text{H}_2\text{O}$  (20 mL) were added and the phases were separated. The aqueous phase was extracted with  $\text{CH}_2\text{Cl}_2$  ( $2 \times 40$  mL). The organic extracts were washed with brine (50 mL), dried over  $\text{Na}_2\text{SO}_4$ , filtered and concentrated *in vacuo*. The residue was next diluted in MeOH (3 mL) and  $\text{H}_2\text{O}$  (1 mL). At  $0^\circ\text{C}$   $\text{NaOH}$  (100 mg, 2.50 mmol, 9.77 eq) was added. The reaction mixture was stirred at rt for 2 h. After removal of MeOH under *vacuo*, the residue was diluted with  $\text{H}_2\text{O}$  (5 mL) and  $\text{CH}_2\text{Cl}_2$  (5 mL). Aqueous HCl (1N) was added until the aqueous phase reached an acidic pH (*ca* 4) and after vigorous stirring for 15 min the phases were separated. The aqueous phase was extracted with  $\text{CH}_2\text{Cl}_2$  ( $2 \times 10$  mL). The combined organic extracts were washed with saturated  $\text{NaHCO}_3$  (10 mL) and brine (10 mL), dried over  $\text{Na}_2\text{SO}_4$ , filtered and concentrated *in vacuo*. The residue was purified by flash column chromatography ( $\text{SiO}_2$ ,  $\text{CH}_2\text{Cl}_2$  then  $\text{CH}_2\text{Cl}_2$ –MeOH, 97:3) to afford the desired phenol as a colourless solid (78 mg, 0.235 mmol, 75%

over 3 steps). m.p. (CH<sub>2</sub>Cl<sub>2</sub>-MeOH): 131-132 °C; IR ( $\nu_{\text{max}}$ /cm<sup>-1</sup>) 3300, 3019, 2933, 1619, 1573, 1504, 1462, 1412, 1282, 1092; <sup>1</sup>H NMR (400 MHz; MeOD)  $\delta$  = 6.95 (1H, d, *J* = 8.3), 6.71 (1H, d, *J* = 8.3), 4.59 – 4.49 (1H, m), 3.17 (2H, t, *J* = 6.9), 2.92 – 2.83 (2H, m), 2.59 (2H, t, *J* = 8.4, 6.9), 2.47 – 2.40 (1H, m), 2.35 – 2.16 (2H, m), 2.01 (3H, br s), 1.70 (2H, app quint, *J* = 7.2), 1.64 – 1.53 (1H, m), 0.72 – 0.66 (2H, m), 0.48 – 0.42 (2H, m); <sup>13</sup>C NMR (101 MHz; MeOD)  $\delta$  = 174.0, 162.1, 150.2, 136.7, 131.2, 129.1, 128.5, 114.9, 42.6, 40.7, 33.0, 30.5, 25.3, 23.7, 23.1, 23.1, 21.8, 7.5; HRMS (ESI<sup>+</sup>): Calculated for C<sub>18</sub>H<sub>26</sub>N<sub>3</sub>O<sub>3</sub> ([M+H]<sup>+</sup>): 332.1968. Found: 332.1963.

## Oxidative dearomatisations (Tables 1, 2)

### General procedure A for oxidative dearomatisation:

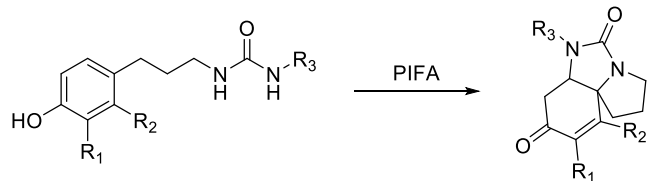

To a solution of the urea in a hexafluoroisopropanol–CH<sub>2</sub>Cl<sub>2</sub> mixture (50:50, 0.2 M) at 0 °C was added a solution of [bis(trifluoroacetoxy)iodo]benzene (1.10 eq) in hexafluoroisopropanol–CH<sub>2</sub>Cl<sub>2</sub> (50:50, 1 M) dropwise. The reaction mixture was kept at 0 °C for 2 h and then allowed to warm to rt. Upon completion, the reaction mixture was concentrated *in vacuo* and the residue was purified by flash column chromatography to give the desired product.

### General procedure B for oxidative dearomatisation:

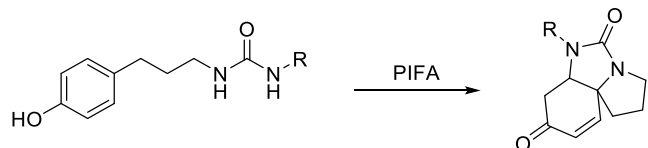

To a solution of the urea in a hexafluoroisopropanol (0.1 M) at 0 °C was added a solution of [bis(trifluoroacetoxy)iodo]benzene (1.10 eq) in hexafluoroisopropanol (1.0 M) dropwise. The reaction mixture was kept at 0 °C for 2 h and then allowed to warm to rt. Upon completion, the reaction mixture was concentrated *in vacuo* and the residue was purified by flash column chromatography to give the desired product.

### 7-Benzyl-5,7-diazatricyclo[6.4.0.0<sup>1,5</sup>]dodec-11-ene-6,10-dione **2a**

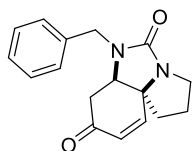

General Procedure A was followed starting with urea **1a** (2.00 g, 7.03 mmol). Flash column chromatography eluting with EtOAc–hexanes (80:20) gave the desired enone (1.34 g, 4.75 mmol, 68%) as a colourless oil.

IR ( $\nu_{\max}$  /cm<sup>-1</sup>) 2966, 1687, 1416, 779, 728, 587; <sup>1</sup>H NMR (500 MHz; MeOD)  $\delta$  = 7.36 – 7.22 (5H, m), 6.48 (1H, dd,  $J$  = 10.2, 0.8), 6.05 (1H,  $J$  = 10.2), 4.81 (1H, d,  $J$  = 15.3), 3.99 (1H, d,  $J$  = 15.3), 3.90 (1H, ddd,  $J$  = 12.0, 7.8, 4.2), 3.65 (1H, dd,  $J$  = 5.6, 5.4), 3.18 (1H, app dt,  $J$  = 12.0, 7.4), 2.64 (1H, d,  $J$  = 5.4), 2.63 (1H, d,  $J$  = 5.6), 2.10 – 2.00 (1H, m), 1.94 – 1.76 (3H, m); <sup>13</sup>C NMR (126 MHz; MeOD)  $\delta$  = 195.5, 162.5, 146.4, 136.2, 128.9, 128.2, 127.9, 127.5, 63.1, 58.5, 46.3, 45.4, 38.2, 35.4, 25.7; HRMS (ESI<sup>+</sup>): Calculated for C<sub>17</sub>H<sub>19</sub>N<sub>2</sub>O<sub>2</sub> ([M+H]<sup>+</sup>): 283.1441. Found: 283.1434.

### 7-Cyclopropyl-5,7-diaztricyclo[6.4.0.0<sup>1,5</sup>]dodec-11-ene-6,10-dione **2b**

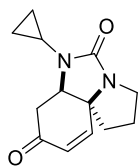

General Procedure A was followed starting with urea **1b** (1.06 g, 4.53 mmol). Flash column chromatography eluting with EtOAc–hexanes (80:20) gave the desired enone (547 mg, 2.36 mmol, 52%) as a colourless oil. IR ( $\nu_{\max}$  / $\text{cm}^{-1}$ ) 3487, 2971, 2889, 1682, 1410, 1379, 1364, 1225;  $^1\text{H}$  NMR (500 MHz; MeOD)  $\delta$  = 6.62 (1H, dd,  $J$  = 10.2, 1.3), 6.04 (1H, dd,  $J$  = 10.2, 0.8), 4.02 (1H, app td,  $J$  = 4.5, 1.3), 3.72 (1H, ddd,  $J$  = 11.9, 7.3, 4.1), 3.17 (1H, dt,  $J$  = 11.9), 2.98 (1H, ddd,  $J$  = 16.7, 4.3, 0.9), 2.90 (1H, dd,  $J$  = 16.7, 4.6), 2.17 (1H, tt,  $J$  = 7.2, 3.7), 2.15 – 1.92 (4H, m), 0.79 (1H, app dtd,  $J$  = 9.7, 7.2 and 5.0), 0.73 (1H, app dtd,  $J$  = 9.7, 7.2 and 4.8), 0.61 (1H, dddd,  $J$  = 10.1, 6.4, 5.0 and 3.7), 0.45 (1H, dddd,  $J$  = 10.1, 6.7, 4.8 and 3.7);  $^{13}\text{C}$  NMR (126 MHz; MeOD)  $\delta$  = 198.4, 165.5, 148.6, 128.1, 65.2, 64.2, 46.9, 38.5, 35.5, 26.9, 25.1, 7.0, 5.0; HRMS (ESI<sup>+</sup>): Calculated for  $\text{C}_{13}\text{H}_{17}\text{N}_2\text{O}_2$  ( $[\text{M}+\text{H}]^+$ ): 233.1284. Found: 233.1281.

### 6-Isopropyl-2,3,6a,7-tetrahydro-1H,5H-benzo[d]pyrrolo[1,2-c]imidazole-5,8(6H)-dione **2c**

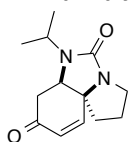

General Procedure A was followed starting with urea **1c** (603 mg, 2.55 mmol). Flash column chromatography eluting with 1% MeOH in DCM gave the desired enone (222 mg, 0.95 mmol, 37%) as a colourless oil.  $^1\text{H}$  NMR (300 MHz, MeOD)  $\delta$  = 6.58 (1H, d,  $J$  = 10.2), 5.96 (1H, d,  $J$  = 10.2), 4.04 (1H, dd,  $J$  = 6.9, 5.3), 3.82 (1H, hept,  $J$  = 6.9), 3.65 (1H, ddd,  $J$  = 15.6, 7.8, 3.9), 3.02 (1H, m), 2.81 (1H, dd,  $J$  = 16.1, 5.2), 2.61 (1H, dd,  $J$  = 16.1, 6.9), 2.05 - 1.90 (1H, m), 1.90 – 1.82 (1H, m), 1.82 – 1.72 (2H, m), 1.14 (3H, d,  $J$  = 6.9), 1.11 (3H, d,  $J$  = 6.9).  $^{13}\text{C}$  NMR (75 MHz, MeOD)  $\delta$  = 198.2, 164.2, 147.8, 128.2, 64.7, 59.1, 46.7, 46.0, 41.9, 35.8, 25.5, 21.4, 19.5. IR  $\nu_{\max}$  (neat)/ $\text{cm}^{-1}$ : 2966, 2938, 2876 (C-H), 1681 (C=O), 1456 (C=C). HRMS (ESI):  $\text{C}_{13}\text{H}_{19}\text{N}_2\text{O}_2$  [ $\text{M} + \text{H}^+$ ]: calculated 235.1441, found 235.1437.

### 7-[2-Methoxyethyl]-5,7-diaztricyclo[6.4.0.0<sup>1,5</sup>]dodecane-6,10-dione **2d**

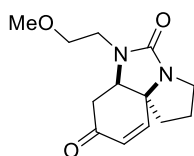

General Procedure A was followed starting with urea **1d** (155 mg, 0.614 mmol). Flash column chromatography eluting with EtOAc–hexanes (8:2 to 10:0) gave the desired enone (57.6 mg, 0.228 mmol, 37%) as a colourless oil. IR ( $\nu_{\max}$  / $\text{cm}^{-1}$ ) 2928, 2885, 1677, 1410, 1392, 1311, 1114, 1028;  $^1\text{H}$  NMR (500 MHz; MeOD)  $\delta$  = 6.47 (1H, dd,  $J$  = 10.2 and 0.9, 12-H), 6.06 (1H, d,  $J$  = 10.2), 4.03 (1H, app t,  $J$  = 5.4), 3.87 – 3.80 (1H, m), 3.53 – 3.39 (3H, m), 3.30 (3H, s, OMe), 3.26 – 3.20 (1H, m), 3.19 – 3.11 (1H, m), 2.78 (1H, dd,  $J$  = 16.4 and 5.2), 2.75 (1H, dd,  $J$

= 16.4 and 5.8), 2.12 – 2.02 (1H, m), 1.99 – 1.87 (3H, m);  $^{13}\text{C}$  NMR (126 MHz; MeOD)  $\delta$  = 195.8, 162.3, 146.2, 127.6, 71.5, 63.2, 60.5, 58.8, 46.1, 41.1, 38.4, 35.2, 25.5; HRMS (ESI<sup>+</sup>): Calculated for  $\text{C}_{13}\text{H}_{19}\text{N}_2\text{O}_3$  ([M+H]<sup>+</sup>): 251.1390. Found: 251.1396.

#### Ethyl 2-{6,10-dioxo-5,7-diazatricyclo[6.4.0.0<sup>1,5</sup>]dodec-11-en-7-yl}acetate **2e**

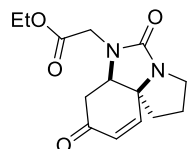

General Procedure A was followed starting with urea **1e** (610 mg, 2.18 mmol). Flash column chromatography eluting with  $\text{CH}_2\text{Cl}_2$ –MeOH (99:1) gave the desired enone (482 mg, 1.73 mmol, 79%) as a colourless oil. IR ( $\nu_{\text{max}}$  / $\text{cm}^{-1}$ ) 2977, 1739, 1687, 1428, 1394, 1314, 1246, 1205, 1094, 1028, 977, 778;  $^1\text{H}$  NMR (500 MHz,  $\text{CDCl}_3$ )  $\delta$  = 6.46 (1H, d,  $J$  = 10.2, 12-H), 6.04 (1H, d,  $J$  = 10.2), 4.18 (1H, d,  $J$  = 18.2), 4.20–4.07 (3H, m), 3.82 (1H, dd,  $J$  = 11.3, 7.8 and 3.3), 3.58 (1H, d,  $J$  = 18.2), 3.18–3.11 (1H, m), 2.73 (1H, dd,  $J$  = 16.8 and 4.9), 2.61 (1H, dd,  $J$  = 16.8 and 4.2), 2.11–1.88 (4H, m), 1.24 (3H, t,  $J$  = 7.2);  $^{13}\text{C}$  NMR (125 MHz,  $\text{CDCl}_3$ )  $\delta$  = 195.0, 169.1, 162.5, 146.9, 127.3, 63.2, 61.3, 60.5, 46.6, 42.6, 37.4, 35.3, 26.2, 14.1; HRMS (ESI<sup>+</sup>): Calculated for  $\text{C}_{14}\text{H}_{18}\text{N}_2\text{NaO}_4$  ([M+Na]<sup>+</sup>): 301.1158. Found: 301.1159.

#### (6aR\*,10aS\*)-6-(4-Toluenesulfonyl)-2,3,6a,7-tetrahydro-1H,5H-benzo[d]pyrrolo[1,2-c]imidazole-5,8(6H)-dione **2f**

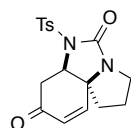

General Procedure A was followed starting with urea **1f** (518 mg, 1.49 mmol). Flash column chromatography eluting with 40% EtOAc/hexanes gave the desired enone (118 mg, 0.34 mmol, 23%) as a white solid. IR  $\nu_{\text{max}}$  (neat)/ $\text{cm}^{-1}$ : 2958, 2930, 1736, 1685, 1597, 1494, 1458, 1369.  $^1\text{H}$  NMR (300 MHz,  $\text{CDCl}_3$ )  $\delta$  = 7.85 (2H, d,  $J$  = 8.3), 7.26 (2H, d,  $J$  = 8.2), 6.40 (1H, d,  $J$  = 10.3), 6.05 (1H, d,  $J$  = 10.3), 4.54 (1H, dd,  $J$  = 8.8, 5.8), 3.84 – 3.70 (1H, m), 3.12 (1H, dd,  $J$  = 15.9, 5.7), 3.05 (1H, ddd,  $J$  = 12.9, 5.7, 1.2), 2.86 (1H, dd,  $J$  = 15.9, 8.8), 2.36 (3H, s), 2.04 – 1.82 (3H, m), 1.63 (1H, dt,  $J$  = 12.8, 9.5).  $^{13}\text{C}$  NMR (75 MHz,  $\text{CDCl}_3$ )  $\delta$  = 194.5, 156.3, 145.2, 142.8, 135.5, 129.7, 129.0, 128.3, 63.2, 58.3, 44.7, 41.3, 35.1, 23.5, 21.7. HRMS (ESI):  $\text{C}_{17}\text{H}_{19}\text{N}_2\text{O}_4\text{S}$  [M + H]<sup>+</sup>: calculated 347.1060, found 347.1060.

#### 5,7-Diazatricyclo[6.4.0.0<sup>1,5</sup>]dodec-11-ene-6,10-dione **2g**

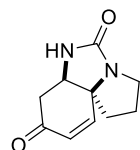

General Procedure A was followed starting with urea **1g** (250 mg, 1.29 mmol). Flash column chromatography eluting with EtOAc–MeOH (90:10) gave the desired enone (157 mg, 0.82 mmol, 64%) as a colourless foam. IR ( $\nu_{\text{max}}$  / $\text{cm}^{-1}$ ) 3291, 2972, 2890, 1675, 1396, 1313, 1241,

1183, 1127;  $^1\text{H}$  NMR (400 MHz,  $\text{CDCl}_3$ )  $\delta$  = 6.46 (1H, d,  $J$  = 10.3), 6.09 (1H, d,  $J$  = 10.3), 5.11 (1H, s), 4.07 (1H, app t,  $J$  = 4.6), 3.80 (1H, dt,  $J$  = 7.7, 5.0), 3.17 – 3.09 (1H, m), 2.72 (1H, dd,  $J$  = 16.7, 4.8), 2.66 (1H, dd,  $J$  = 16.7, 4.6), 2.13 – 2.06 (1H, m), 2.03 – 1.89 (3H, m);  $^{13}\text{C}$  NMR (101 MHz,  $\text{CDCl}_3$ )  $\delta$  = 195.4, 163.4, 146.2, 127.7, 65.1, 57.4, 45.6, 40.0, 35.3, 26.3; HRMS (ESI $^+$ ): Calculated for  $\text{C}_{10}\text{H}_{12}\text{N}_2\text{O}_2$  ( $[\text{M}+\text{H}]^+$ ): 193.0972. Found: 193.0966.

#### 7-(4-Chlorophenyl)-5,7-diazatricyclo[6.4.0.0 $^1$ , $^5$ ]dodec-11-ene-6,10-dione **2h**

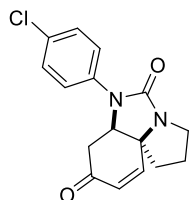

General Procedure A was followed starting with urea **1h** (100 mg, 0.328 mmol). Flash column chromatography eluting with EtOAc–hexanes (5:5) gave the desired enone (46.8 mg, 0.155 mmol, 47%) as a colourless oil. IR ( $\nu_{\text{max}}$  / $\text{cm}^{-1}$ ) 2967, 2887, 1686, 1493, 1414, 1381, 1314, 1044;  $^1\text{H}$  NMR (400 MHz,  $\text{CDCl}_3$ )  $\delta$  = 7.32 (2H, d,  $J$  = 8.8), 7.19 (2H, d,  $J$  = 8.8), 6.55 (1H, d,  $J$  = 10.2), 6.12 (1H, d,  $J$  = 10.2), 4.46 (1H, dd,  $J$  = 5.8, 5.2), 3.96 – 3.88 (1H, m), 3.29 – 3.20 (1H, m), 2.79 (1H, dd,  $J$  = 16.6, 5.2), 2.68 (1 H, dd,  $J$  = 16.6, 5.8), 2.20 – 1.99 (4H, m);  $^{13}\text{C}$  NMR (101 MHz,  $\text{CDCl}_3$ )  $\delta$  = 194.7, 159.9, 145.7, 135.7, 130.7, 129.4, 127.9, 124.0, 62.8, 60.2, 45.8, 38.2, 35.8, 25.4; HRMS (ESI $^+$ ): Calculated for  $\text{C}_{16}\text{H}_{16}^{35}\text{ClN}_2\text{O}_2$  ( $[\text{M}+\text{H}]^+$ ): 303.0894. Found: 303.0892.

#### 6-(4-Methoxyphenyl)-2,3,6a,7-tetrahydro-1H,5H-benzo[*d*]pyrrolo[1,2-*c*]imidazole-5,8(6*H*)-dione **2i**

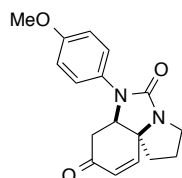

General Procedure A was followed starting with urea **1i** (250 mg, 0.83 mmol). Flash column chromatography eluting with 1% MeOH in DCM gave the desired enone (104 mg, 0.35 mmol, 42%) as a white solid. IR  $\nu_{\text{max}}$  (neat)/ $\text{cm}^{-1}$ : 2957, 2900, 2834, 1686, 1582, 1510, 1443, 1390.  $^1\text{H}$  NMR (300 MHz,  $\text{CDCl}_3$ )  $\delta$  = 7.13 (2H, d,  $J$  = 9.0), 6.91 (2H, d,  $J$  = 9.0), 6.56 (1H, d,  $J$  = 10.2), 6.13 (1H, d,  $J$  = 10.3), 4.36 (1H, t,  $J$  = 5.1), 3.99 – 3.88 (1H, m), 3.80 (3H, s), 3.30 - 3.19 (1H, m), 2.74 (1H, dd,  $J$  = 16.6, 5.0), 2.66 (1H, dd,  $J$  = 16.6, 5.2), 2.30 – 2.12 (1H, m), 2.12 – 2.07 (1H, m), 2.06 – 1.99 (2H, m).  $^{13}\text{C}$  NMR (75 MHz,  $\text{CDCl}_3$ )  $\delta$  = 195.1, 160.6, 157.7, 146.2, 129.8, 127.6, 125.8, 114.6, 62.8, 61.7, 55.5, 45.9, 38.1, 35.5, 25.7. HRMS (ESI):  $\text{C}_{17}\text{H}_{19}\text{N}_2\text{O}_3$  [ $\text{M} + \text{H}^+$ ]: calculated 299.1390, found 299.1390.



### 7-[4-(Trifluoromethyl)phenyl]-5,7-diazatricyclo[6.4.0.0<sup>1,5</sup>]dodec-11-ene-6,10-dione **2j**

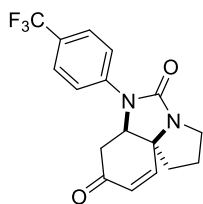

General Procedure A was followed starting with urea **1j** (1.93 g, 5.69 mmol). Flash column chromatography eluting with MeOH–CH<sub>2</sub>Cl<sub>2</sub> (1:99) gave the desired enone (1.51 g, 4.49 mmol, 79%) as a colourless oil. IR ( $\nu_{\max}$  /cm<sup>-1</sup>) 2973, 2896, 1686, 1614, 1522, 1425, 1323, 1313, 1072; <sup>1</sup>H NMR (500 MHz; MeOD)  $\delta$  = 6.62 (1H, dd,  $J$  = 10.2, 1.3), 6.04 (1H, dd,  $J$  = 10.2, 0.8), 4.02 (1H, app td,  $J$  = 4.5, 1.3), 3.72 (1H, ddd,  $J$  = 11.9, 7.3, 4.1), 3.17 (1H, dt,  $J$  = 11.9, 7.2), 2.98 (1H, ddd,  $J$  = 16.7, 4.3, 0.9), 2.90 (1H, dd,  $J$  = 16.7, 4.6), 2.17 (1H, tt,  $J$  = 7.2, 3.7), 2.15 – 1.92 (4H, m), 0.79 (1H, app dtd,  $J$  = 9.7, 7.2 and 5.0), 0.73 (1H, app dtd,  $J$  = 9.7, 7.2 and 4.8), 0.61 (1H, dddd,  $J$  = 10.1, 6.4, 5.0 and 3.7), 0.45 (1H, dddd,  $J$  = 10.1, 6.7, 4.8 and 3.7); <sup>13</sup>C NMR (126 MHz; MeOD)  $\delta$  = 198.4, 165.5, 148.6, 128.1, 65.2, 64.2, 46.9, 38.5, 35.5, 26.9, 25.1, 7.0, 5.0; HRMS (ESI<sup>+</sup>): Calculated for C<sub>17</sub>H<sub>16</sub>F<sub>3</sub>N<sub>2</sub>O<sub>2</sub> ([M+H]<sup>+</sup>): 337.1158. Found: 337.1152.

### 7-Benzyl-11-methoxy-5,7-diazatricyclo[6.4.0.0<sup>1,5</sup>]dodec-11-ene-6,10-dione **2k**

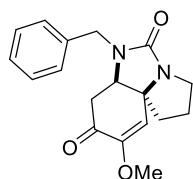

General Procedure B was followed starting with urea **1k** (87 mg, 0.28 mmol). Flash column chromatography (SiO<sub>2</sub>, hexane–EtOAc, 2:8 to 1:9) gave the desired enone (47 mg, 0.15 mmol, 54%) as a colourless oil. IR ( $\nu_{\max}$  /cm<sup>-1</sup>) 2956, 2908, 1692, 1494, 1360, 1317, 1283, 1081; <sup>1</sup>H NMR (400 MHz; CDCl<sub>3</sub>)  $\delta$  = 7.28 – 7.15 (5H, m), 5.31 (1H, s), 4.76 (1H, d,  $J$  = 15.2), 3.91 (1H, d,  $J$  = 15.2), 3.83 (1H, ddd,  $J$  = 12.0, 7.8, 4.2), 3.57 (3H, s), 3.52 (1H, t,  $J$  = 5.6), 3.13 (1H, dt,  $J$  = 12.0, 7.1), 2.72 – 2.62 (2H, m), 2.06 – 1.93 (1H, m), 1.89 – 1.70 (3H, m); <sup>13</sup>C NMR (101 MHz; CDCl<sub>3</sub>)  $\delta$  = 190.4, 162.5, 150.1, 136.1, 128.9, 128.4, 127.9, 113.8, 64.7, 57.6, 55.1, 45.9, 45.4, 38.9, 36.6, 25.5; HRMS (ESI<sup>+</sup>): Calculated for C<sub>18</sub>H<sub>21</sub>N<sub>2</sub>O<sub>3</sub> ([M+H]<sup>+</sup>): 313.1546. Found: 313.1545.

### Ethyl 2-{11-methoxy-6,10-dioxo-5,7-diazatricyclo[6.4.0.0<sup>1,5</sup>]dodec-11-en-7-yl}acetate **2l**

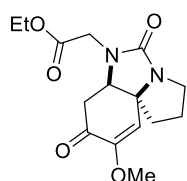

General Procedure B was followed starting with urea **1l** (190 mg, 0.612 mmol). Flash column chromatography (SiO<sub>2</sub>, hexane–EtOAc, 2:8 to 0:10) gave the desired enone (157 mg, 0.510 mmol, 83%) as a colourless oil. IR ( $\nu_{\max}$  /cm<sup>-1</sup>) 3469, 2975, 1687, 1631, 1416, 1389, 1318, 1199, 1150, 1085; <sup>1</sup>H NMR (400 MHz; CDCl<sub>3</sub>)  $\delta$  = 5.35 (1H, s), 4.21 (1H, d,  $J$  = 18.24.19 – 4.08

(3H, m), 3.82 (1H, ddd,  $J = 11.7, 7.3, 3.6$ ), 3.61 (3H, s), 3.57 (1H, d,  $J = 18.2$ ), 3.16 (1H, ddd,  $J = 11.7, 7.9, 6.8$ ), 2.81 (1H, dd,  $J = 16.7, 4.7$ ), 2.72 (1H, dd,  $J = 16.7, 4.6$ ), 2.14 – 1.87 (4H, m), 1.24 (3H, t,  $J = 7.1$ );  $^{13}\text{C}$  NMR (101 MHz;  $\text{CDCl}_3$ )  $\delta = 190.1, 169.2, 162.5, 149.8, 114.5, 64.9, 61.4, 59.9, 55.1, 46.3, 42.6, 38.1, 36.7, 26.1, 14.2$ ; HRMS ( $\text{ESI}^+$ ): Calculated for  $\text{C}_{15}\text{H}_{21}\text{N}_2\text{O}_5$  ( $[\text{M}+\text{H}]^+$ ): 309.1444. Found: 309.1444.

### 11-Methoxy-7-(4-methylbenzenesulfonyl)-5,7-diazatricyclo[6.4.0.0<sup>1,5</sup>]dodec-11-ene-6,10-dione **2m**

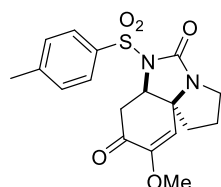

General Procedure B was followed starting with urea **1m** (140 mg, 0.371 mmol). Flash column chromatography ( $\text{SiO}_2$ , hexane–EtOAc, 2:8 to 0:10) gave the desired enone (102 mg, 0.271 mmol, 73%) as a colourless solid. m.p. (hexane–EtOAc) 205.2–208.6 °C; IR ( $\nu_{\text{max}}/\text{cm}^{-1}$ ) 2974, 2907, 2255, 1736, 1633, 1595, 1337, 1203, 1149, 1063;  $^1\text{H}$  NMR (400 MHz;  $\text{CDCl}_3$ )  $\delta = 7.91$  (2H, d,  $J = 8.3$ ), 7.31 (2H, d,  $J = 8.3$ ), 5.30 (1H, s), 4.57 (1H, dd,  $J = 9.2, 5.7$ ), 3.84 (1H, ddd,  $J = 12.4, 8.4, 6.1$ ), 3.62 (3H, s), 3.28 (1H, dd,  $J = 15.9, 5.7$ ), 3.11 (1H, ddd,  $J = 12.4, 8.5, 6.5$ ), 2.99 (1H, dd,  $J = 15.9, 9.2$ ), 2.42 (3H, s), 2.10 – 1.98 (2H, m), 1.92 (1H, ddd,  $J = 12.4, 7.2, 3.4$ ), 1.68 (1H, app dt,  $J = 12.4, 9.8$ );  $^{13}\text{C}$  NMR (101 MHz;  $\text{CDCl}_3$ )  $\delta = 189.4, 156.6, 151.1, 145.3, 135.6, 129.8, 128.3, 110.2, 65.1, 57.6, 55.3, 44.3, 42.0, 36.4, 23.5, 21.8$ ; HRMS ( $\text{ESI}^+$ ): Calculated for  $\text{C}_{18}\text{H}_{21}\text{N}_2\text{O}_5\text{S}$  ( $[\text{M}+\text{H}]^+$ ): 377.1165. Found: 377.1162.

### 7-(4-Chlorophenyl)-11-methoxy-5,7-diazatricyclo[6.4.0.0<sup>1,5</sup>]dodec-11-ene-6,10-dione **2n**

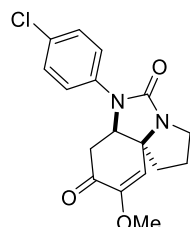

General Procedure A was followed starting with urea **1n** (80.5 mg, 0.241 mmol). Flash column chromatography ( $\text{SiO}_2$ , hexane–EtOAc, 3:7 to 2:8) gave the desired enone (51.4 mg, 0.155 mmol, 64%) as a colourless oil. IR ( $\nu_{\text{max}}/\text{cm}^{-1}$ ) 2964, 2897, 1696, 1633, 1494, 1386, 1320, 1092;  $^1\text{H}$  NMR (400 MHz,  $\text{CDCl}_3$ )  $\delta = 7.31$  (2H, d,  $J = 8.8$ ), 7.21 (2H, d,  $J = 8.8$ ), 5.43 (1H, s), 4.41 (1H, dd,  $J = 6.0, 5.3$ ), 3.92 (1H, ddd,  $J = 12.2, 7.7, 4.5$ ), 3.67 (3H, s), 3.30 – 3.20 (1H, m), 2.90 (1H, dd,  $J = 16.4, 5.1$ ), 2.80 (1H, dd,  $J = 16.4, 6.3$ ), 2.29 – 1.95 (4H, m);  $^{13}\text{C}$  NMR (101 MHz,  $\text{CDCl}_3$ )  $\delta = 189.7, 160.0, 150.3, 135.9, 130.6, 129.4, 123.7, 113.0, 64.4, 59.5, 55.2, 45.4, 38.9, 37.1, 25.2$ ; HRMS ( $\text{ESI}^+$ ): Calculated for  $\text{C}_{17}\text{H}_{18}^{35}\text{ClN}_2\text{O}_3$  ( $[\text{M}+\text{H}]^+$ ): 333.1000. Found: 333.0997.

**11-Cyclopropyl-11,13-diazatetracyclo[8.6.0.0<sup>1,13</sup>.0<sup>2,7</sup>]hexadeca-2(7),3,5-triene-8,12-dione**  
**2o**

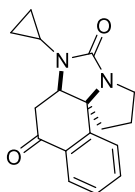

General Procedure A was followed starting with urea **1o** (76.6 mg, 0.270 mmol). Flash column chromatography (SiO<sub>2</sub>, CH<sub>2</sub>Cl<sub>2</sub> then CH<sub>2</sub>Cl<sub>2</sub>–MeOH, 95:5) gave the desired product (20.5 mg, 0.072 mmol, 27%) as a colourless solid. m.p. 163.1–163.2°C; IR ( $\nu_{\max}$  /cm<sup>-1</sup>) 2968, 2881, 1686, 1601, 1396, 1376, 1323, 1292, 1174; <sup>1</sup>H NMR (400 MHz, CDCl<sub>3</sub>)  $\delta$  = 7.92 (1H, dd, *J* = 8.1, 1.4), 7.61 (1H, ddd, *J* = 8.1, 7.7, 1.4), 7.40 – 7.35 (2H, m), 4.04 (1H, dd, *J* = 12.1, 7.9), 3.86 (1H, dd, *J* = 4.1, 3.6), 3.39 (1H, app td, *J* = 11.5, 5.4), 3.32 (1H, dd, *J* = 16.7, 3.6), 2.94 (1H, dd, *J* = 16.7, 4.1), 2.36 – 2.17 (3H, m), 2.11 – 2.04 (1H, m), 2.01 – 1.87 (1H, m), 0.85 – 0.76 (1H, m), 0.72 – 0.57 (2H, m), 0.51 – 0.43 (1 H, m); <sup>13</sup>C NMR (101 MHz, CDCl<sub>3</sub>)  $\delta$  = 194.9, 164.8, 146.6, 134.8, 131.2, 128.3, 127.8, 125.4, 66.3, 64.8, 48.8, 39.0, 37.8, 27.5, 24.9, 5.9, 4.6; HRMS (ESI<sup>+</sup>): Calculated for C<sub>17</sub>H<sub>19</sub>N<sub>2</sub>O<sub>2</sub> ([M+H]<sup>+</sup>): 283.1441. Found: 283.1441.

**Ethyl 2-{8,12-dioxo-11,13-diazatetracyclo[8.6.0.0<sup>1,13</sup>.0<sup>2,7</sup>]hexadeca-2(7),3,5-trien-11-yl}acetate 2p**

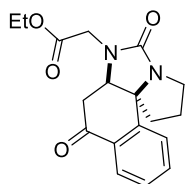

General Procedure B was followed starting with urea **1p** (95 mg, 0.29 mmol). Flash column chromatography (SiO<sub>2</sub>, hexane–EtOAc, 9:1) gave the desired product (60 mg, 0.18 mmol, 62%) as a colourless solid. mp (hexane–EtOAc): 115.7–116.3 °C; IR ( $\nu_{\max}$  /cm<sup>-1</sup>) 2975, 2890, 1739, 1691, 1601, 1408, 1389, 1324, 1294, 1204; <sup>1</sup>H NMR (400 MHz; CDCl<sub>3</sub>)  $\delta$  = 7.91 (1H, dd, *J* = 7.9, 1.2), 7.62 (1H, td, *J* = 7.9, 1.3), 7.43 – 7.35 (2H, m), 4.31 (1H, app t, *J* = 3.7), 4.23 – 4.13 (3H, m), 4.03 (1H, app dd, *J* = 11.7, 7.5), 3.60 (1H, d, *J* = 18.2), 3.42 (1H, app td, *J* = 11.5, 5.5), 2.97 (1H, dd, *J* = 16.9, 4.1), 2.90 (1H, dd, *J* = 16.9, 3.4), 2.43 – 2.19 (3H, m), 2.14 – 1.98 (1H, m), 1.26 (3H, t, *J* = 7.1); <sup>13</sup>C NMR (101 MHz; CDCl<sub>3</sub>)  $\delta$  = 194.5, 169.4, 163.7, 146.4, 134.9, 131.3, 128.3, 127.9, 125.4, 65.6, 62.6, 61.4, 49.4, 42.7, 39.1, 37.4, 27.7, 14.2; HRMS (ESI<sup>+</sup>): Calculated for C<sub>18</sub>H<sub>21</sub>N<sub>2</sub>O<sub>4</sub> ([M+H]<sup>+</sup>): 329.1495. Found: 329.1491.

**11-(4-Chlorophenyl)-11,13-diazatetracyclo[8.6.0.0<sup>1</sup>,<sup>13</sup>.0<sup>2</sup>,<sup>7</sup>]hexadeca-2(7),3,5-triene-8,12-dione **2q****

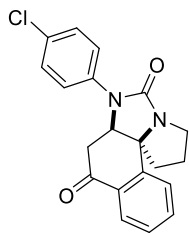

General Procedure A was followed starting with urea **1q** (105 mg, 0.296 mmol). Flash column chromatography (SiO<sub>2</sub>, hexane–EtOAc, 7:3 to 5:5) gave the desired product (63.3 mg, 0.179 mmol, 60%) as a colourless solid. mp (hexane–EtOAc): 187–188 °C; IR ( $\nu_{\max}$  /cm<sup>-1</sup>) 2951, 2885, 1690, 1598, 1531, 1493, 1374, 1325, 1175, 1132, 1089; <sup>1</sup>H NMR (400 MHz, MeOD)  $\delta$  = 7.87 (1H, dd, *J* = 7.9, 1.2), 7.75 (1H, ddd, *J* = 8.1, 7.4, 1.4), 7.63 (1H, d, *J* = 7.9), 7.46 (1H, ddd, *J* = 8.1, 7.4, 1.1), 7.39 (2H, d, *J* = 8.8), 7.12 (2H, d, *J* = 8.8), 4.71 (1H, dd, *J* = 4.0, 3.5), 3.95 (1H, app dd, *J* = 11.6, 7.7), 3.54 (1H, app td, *J* = 11.4, 5.9), 3.17 (1H, dd, *J* = 16.9, 4.2), 2.89 (1H, dd, *J* = 16.9, 3.3), 2.58 (1H, ddd, *J* = 13.3, 8.4, 1.7), 2.43 (1H, ddd, *J* = 13.3, 10.9, 7.4), 2.37 – 2.28 (1H, m), 2.20 – 2.08 (1H, m); <sup>13</sup>C NMR (101 MHz, MeOD)  $\delta$  = 196.2, 163.5, 147.6, 137.2, 136.2, 132.5, 132.3, 130.1, 129.6, 129.0, 127.2, 126.1, 66.9, 65.0, 39.5, 37.9, 28.2 (one signal under solvent peak, at 48.6 in CDCl<sub>3</sub>); HRMS (ESI<sup>+</sup>): Calculated for C<sub>20</sub>H<sub>18</sub><sup>35</sup>ClN<sub>2</sub>O<sub>2</sub> ([M+H]<sup>+</sup>): 353.1051. Found: 353.1045.

**11-(4-Methylbenzenesulfonyl)-11,13-diazatetracyclo[8.6.0.0<sup>1</sup>,<sup>13</sup>.0<sup>2</sup>,<sup>7</sup>]hexadeca-2(7),3,5-triene-8,12-dione **2r****

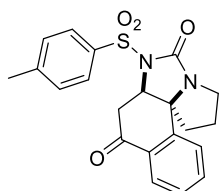

General Procedure A was followed starting with urea **1r** (99.6 mg, 0.250 mmol). Flash column chromatography (SiO<sub>2</sub>, hexane–EtOAc, 2:8 then CH<sub>2</sub>Cl<sub>2</sub>–MeOH 95:5) gave the desired product (28.7 mg, 0.0720 mmol, 29%) as a colourless oil. IR ( $\nu_{\max}$  /cm<sup>-1</sup>) 2927, 2892, 1732, 1692, 1599, 1328, 1293, 1167, 1087; <sup>1</sup>H NMR (400 MHz, CDCl<sub>3</sub>)  $\delta$  = 7.97 (1H, dd, *J* = 7.8, 1.2), 7.90 (2H, d, *J* = 8.3), 7.61 (1H, app td, *J* = 7.7, 1.4), 7.43 (1H, app td, *J* = 7.3, 0.8), 7.33 – 7.28 (3H, m), 4.50 (1H, app t, *J* = 5.1), 3.97 (1H, ddd, *J* = 10.5, 8.4, 1.7), 3.62 (1H, dd, *J* = 16.4, 5.5), 3.38 – 3.30 (1H, m), 3.15 (1H, dd, *J* = 16.4, 4.7), 2.41 (3H, s), 2.28 – 2.16 (3H, m), 2.01 – 1.95 (1H, m); <sup>13</sup>C NMR (101 MHz, CDCl<sub>3</sub>)  $\delta$  = 193.4, 156.9, 145.2, 143.8, 135.1, 134.9, 131.4, 129.7, 128.6, 127.4, 126.2, 65.8, 63.2, 47.4, 40.2, 38.2, 26.2, 21.8; HRMS (ESI<sup>+</sup>): Calculated for C<sub>21</sub>H<sub>21</sub>N<sub>2</sub>O<sub>4</sub>S ([M+H]<sup>+</sup>): 397.1216. Found: 397.1219.

**6-Acetyl-11-cyclopropyl-6,11,13-triazatetracyclo[8.6.0.0<sup>1</sup>,<sup>13</sup>.0<sup>2</sup>,<sup>7</sup>]hexadec-2(7)-ene-8,12-dione 2s**

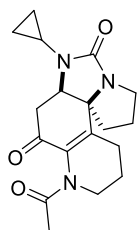

General Procedure B was followed starting with urea **1s** (76 mg, 0.23 mmol). Flash column chromatography (SiO<sub>2</sub>, CH<sub>2</sub>Cl<sub>2</sub> then CH<sub>2</sub>Cl<sub>2</sub>-MeOH, 97:3) gave the desired product (59 mg, 0.18 mmol, 78%) as a colourless oil. The product is rotameric leading to complex NMRs – spectra (CDCl<sub>3</sub>) were recorded at rt and 50 °C without significant clarification; switching to MeOD did not result in clarification.

IR ( $\nu_{\max}$  /cm<sup>-1</sup>) 2957, 2883, 2237, 1687, 1655, 1386, 1315, 1230, 1027; <sup>1</sup>H NMR (501 MHz, CDCl<sub>3</sub>, 50 °C)  $\delta$  = 3.93 (1H, dd,  $J$  = 11.9, 8.3), 3.86 – 3.67 (2H, br m, includes at 3.73, dd,  $J$  = 4.1, 3.0), 3.41 – 3.16 (1H, br m), 3.16 (1H, dd,  $J$  = 15.6, 2.9), 3.10 – 3.03 (1H, m), 2.86 (1H, dd,  $J$  = 15.6, 4.0), 2.34 and 2.30 (1H, 2 × t,  $J$  = 6.8), 2.16 – 1.73 (11H, m), 0.84 – 0.78 (1H, m), 0.71 – 0.60 (2H, m), 0.60 – 0.53 (1H, m); <sup>13</sup>C NMR (126 MHz, CDCl<sub>3</sub>, 50 °C)  $\delta$  = 188.2, 169.2, 163.6, 145.9 (*very broad and faint*), 134.4, 66.1, 65.1, 48.4, 42.5, 36.1, 33.7, 26.1, 23.9, 23.3, 22.2, 21.7, 4.8, 3.6; HRMS (ESI<sup>+</sup>): Calculated for C<sub>18</sub>H<sub>24</sub>N<sub>3</sub>O<sub>3</sub> ([M+H]<sup>+</sup>): 330.1812. Found: 330.1807.

## Preparation of compounds 3-6 (Scheme 1)

### Preparation of 3a

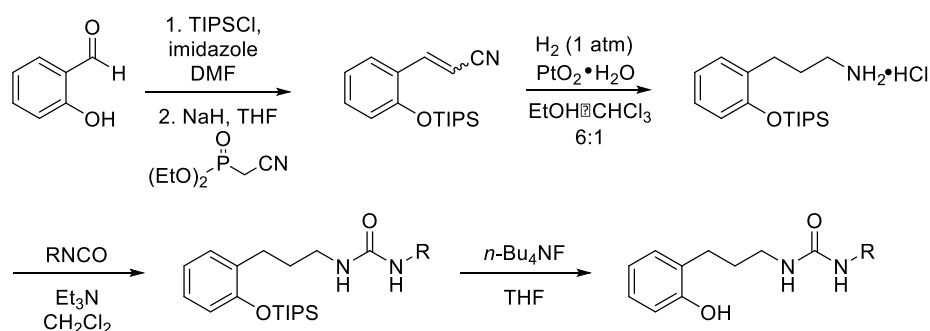

### 2-[[Tris(propan-2-yl)silyl]oxy]benzaldehyde **S20**

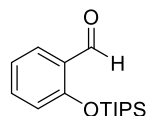

Salicylaldehyde (3 mL, 28.2 mmol) was dissolved in DMF (14 mL). Triisopropylsilyl chloride (7.3 mL, 34 mmol, 1.2 eq) was added and the reaction mixture was cooled down to 0 °C before the addition of imidazole (2.31 g, 33.9 mmol, 1.20 eq). The reaction mixture was warmed to rt and stirred overnight. EtOAc (50 mL) and H<sub>2</sub>O (20 mL) were added. The phases were separated and the organic phase was successively washed with H<sub>2</sub>O (2 × 20 mL), aqueous HCl (1M, 20 mL), aqueous saturated NaHCO<sub>3</sub> (20 mL) and brine (50 mL). The organic phase was then dried over Na<sub>2</sub>SO<sub>4</sub>, filtered and concentrated *in vacuo*. Flash column chromatography (SiO<sub>2</sub>, hexane–EtOAc, 95:5) gave the title compound **S20** (6.85 g, 24.6 mmol, 87%) as a colourless oil. IR ( $\nu_{\text{max}}/\text{cm}^{-1}$ ) 2945, 2866, 1597, 1575, 1388, 1368, 1476, 1456, 1306, 1275, 1117; <sup>1</sup>H NMR (300 MHz; CDCl<sub>3</sub>)  $\delta$  = 10.5 (1H, s), 7.81 (1H, dd,  $J$  = 7.8, 1.9), 7.44 (1H, ddd,  $J$  = 8.3, 7.3, 1.9), 7.04 – 6.97 (1H, m), 6.89 (1H, dd,  $J$  = 8.3, 0.6), 1.42 – 1.28 (3H, m), 1.13 (18H, d,  $J$  = 7.2); <sup>13</sup>C NMR (75 MHz; CDCl<sub>3</sub>)  $\delta$  = 190.4, 159.6, 135.8, 128.4, 126.9, 121.2, 119.9, 18.1, 13.2; HRMS (ESI<sup>+</sup>): Calculated for C<sub>16</sub>H<sub>27</sub>O<sub>2</sub>Si ([M+H]<sup>+</sup>): 279.1774. Found: 279.1766.

### (2E/2Z)-3-(2-[[Tris(propan-2-yl)silyl]oxy]phenyl)prop-2-enitrile **S21**

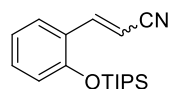

Following a procedure adapted from Pouységu *et al.*,<sup>2</sup> to a solution of THF (60 mL) at 0 °C was added NaH (60% in mineral oil, 1.13 g, 28.1 mmol, 1.15 eq) portionwise and the suspension was stirred for 10 min. Diethylcyanophosphonate (4.6 mL, 28.4 mmol, 1.16 eq) was added dropwise at 0 °C and the reaction mixture was stirred 10 min before the addition of aldehyde **S20** (6.8 g, 24.4 mmol) in THF (19 mL). The reaction mixture was stirred for 2 h at 0 °C, and Et<sub>2</sub>O was added (100 mL) before filtration of the reaction mixture directly over a pad of silica washed with Et<sub>2</sub>O. After concentration *in vacuo*, the residue was purified

by flash column chromatography (SiO<sub>2</sub>, hexane–EtOAc, 9:1) to give the desired nitriles **S21** as an inseparable mixture of isomers (7.22 g, 23.9 mmol, 97%, *E/Z* 3.3:1). IR ( $\nu_{\max}$  /cm<sup>-1</sup>) 2945, 2867, 2216, 1611, 1598, 1481, 1454, 1263, 1103; **Major E isomer** <sup>1</sup>H NMR (300 MHz; CDCl<sub>3</sub>)  $\delta$  = 7.78 (1H, d, *J* = 16.8), 7.41 (1H, dd, *J* = 7.8, 1.7), 1.42 – 1.28 (1H, m), 6.95 (1H, t, *J* = 7.5), 6.86 (1H, d, *J* = 8.3), 5.89 (1H, d, *J* = 16.8), 1.40 – 1.25 (3H, m), 1.12 (18H, d, *J* = 7.2); <sup>13</sup>C NMR (75 MHz; CDCl<sub>3</sub>)  $\delta$  = 154.9, 146.4, 132.4, 127.2, 124.7, 121.4, 119.5, 118.9, 95.7, 18.0, 13.1; **Minor Z isomer** <sup>1</sup>H NMR (300 MHz; CDCl<sub>3</sub>)  $\delta$  = 8.12 (1H, dd, *J* = 7.9, 1.6), 7.61 (1H, d, *J* = 12.2), 1.42 – 1.28 (1H, m), 7.01 (1H, t, *J* = 7.8), 6.86 (1H, d, *J* = 8.3), 5.42 (1H, d, *J* = 12.2), 1.40 – 1.25 (3H, m), 1.12 (18H, d, *J* = 7.1); <sup>13</sup>C NMR (75 MHz; CDCl<sub>3</sub>)  $\delta$  = 154.8, 144.4, 132.2, 128.5, 125.0, 121.3, 118.9, 117.7, 94.4, 18.0, 13.0; HRMS (ESI<sup>+</sup>): Calculated for C<sub>18</sub>H<sub>28</sub>NOSi ([M+H]<sup>+</sup>): 302.1934. Found: 302.1925.

### Amine salt **S22**

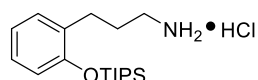

Following a procedure adapted from Pouységu *et al.*,<sup>2</sup> to a mixture of EtOH–CHCl<sub>3</sub> (6:1, 53 mL) was added unsaturated nitrile (3.50 g, 11.6 mmol). PtO<sub>2</sub>·H<sub>2</sub>O (184 mg, 0.810 mmol, 0.07 eq) was added and the reaction mixture was stirred under an atmosphere of H<sub>2</sub> (balloon) overnight. MeOH (100 mL) was added and the stirring was stopped. After 30 min the reaction mixture was removed from the reaction flask without the solid platinum residue. After concentration *in vacuo* the amine salt **S22** was used directly without further purification.

### 3-(Prop-2-en-1-yl)-1-[3-(2-{[tris(propan-2-yl)silyl]oxy}phenyl)propyl]urea **S23**

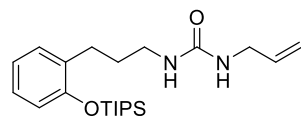

To a solution of the crude amine salt **S22** (1.04 g,  $\leq$  3.03 mmol) in CH<sub>2</sub>Cl<sub>2</sub> (20 mL) at 0 °C was successively added Et<sub>3</sub>N (450  $\mu$ L, 3.22 mmol,  $\geq$  1.06 eq) and allyl isocyanate (270  $\mu$ L, 3.05 mmol,  $\geq$  1.01 eq). The reaction mixture was stirred for 2 h at rt. Saturated aqueous NH<sub>4</sub>Cl (20 mL) and H<sub>2</sub>O (20 mL) were added and the phases were separated. The aqueous phase was extracted with CH<sub>2</sub>Cl<sub>2</sub> (2  $\times$  40 mL). The organic extracts were washed with Brine (50 mL), dried over Na<sub>2</sub>SO<sub>4</sub>, filtered and concentrated *in vacuo*. Flash column chromatography (SiO<sub>2</sub>, hexane–EtOAc, 6:4) provided the desired urea **S23** as a colourless oil (826 mg, 2.12 mmol, 70% over two steps). IR ( $\nu_{\max}$  /cm<sup>-1</sup>) 3334, 2943, 2865, 1629, 1570, 1489, 1452, 1256, 1014; <sup>1</sup>H NMR (300 MHz, CDCl<sub>3</sub>)  $\delta$  = 7.10 (1H, dd, *J* = 7.4, 1.7), 7.04 (1H, td, *J* = 7.7, 1.8), 6.84 (1H, td, *J* = 7.4, 1.1), 6.78 (1H, dd, *J* = 8.0, 0.9), 5.84 (1H, ddt, *J* = 17.1, 10.4, 5.5), 5.17 (1H, app dq, *J* = 17.2, 1.6), 5.10 (1H, ddt, *J* = 10.2, 1.6, 1.4), 4.49 – 4.40 (1H, m), 3.76 (2H, app tt, *J* = 5.7, 1.5), 3.48 (1H, s), 3.20 (2H, app dt, *J* = 7.0, 6.0), 2.66 (2H, dd, *J* = 8.2, 6.9), 1.86 – 1.74 (2H, m), 1.37 – 1.23 (3H, m), 1.10 (18 H, d, *J* = 7.2); <sup>13</sup>C NMR (75 MHz, CDCl<sub>3</sub>)  $\delta$  = 158.2, 154.0, 135.5, 131.7, 130.2, 127.0, 120.9, 118.1, 115.8, 43.2, 40.6, 30.4, 28.2, 18.2, 13.2; HRMS (ESI<sup>+</sup>): Calculated for C<sub>22</sub>H<sub>39</sub>N<sub>2</sub>O<sub>2</sub>Si ([M+H]<sup>+</sup>): 391.2775. Found: 391.2778.

### 1-[3-(2-Hydroxyphenyl)propyl]-3-(prop-2-en-1-yl)urea **3**

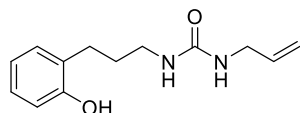

To a solution of the above urea **S23** (769 mg, 1.97 mmol) in THF (20 mL) at 0 °C was added *n*Bu<sub>4</sub>NF (1M in THF, 2.6 mL, 2.6 mmol, 1.3 eq) dropwise. The reaction mixture warmed to rt and stirred for 2 h. After concentration *in vacuo* the residue was purified by flash column chromatography (SiO<sub>2</sub>, hexane–EtOAc, 4:6 to 2:8) to afford the desired phenol as a colourless solid (333 mg, 1.42 mmol, 72%). m.p. 95.7–96.3 °C; IR ( $\nu_{\max}$  /cm<sup>-1</sup>) 3376, 3328, 2948, 2864, 1602, 1571, 1504, 1457, 1417, 1350, 1267, 1232, 1180, 1113; <sup>1</sup>H NMR (400 MHz, MeOD)  $\delta$  = 7.04 (1H, d, *J* = 7.3), 6.98 (1H, t, *J* = 7.6), 6.76 – 6.70 (2H, t, *J* = 7.5), 5.85 (1H, ddt, *J* = 16.8, 10.2, 4.8), 5.17 (1H, d, *J* = 16.8), 5.06 (1H, d, *J* = 10.2), 3.73 (2H, d, *J* = 4.8), 3.13 (2H, t, *J* = 6.9), 2.62 (2H, t, *J* = 7.5), 1.81 – 1.71 (2H, m); <sup>13</sup>C NMR (101 MHz, MeOD)  $\delta$  = 161.1, 156.2, 136.9, 131.0, 129.2, 127.9, 120.5, 115.8, 115.2, 43.3, 40.7, 31.5, 28.3; HRMS (ESI<sup>+</sup>): Calculated for C<sub>13</sub>H<sub>19</sub>N<sub>2</sub>O<sub>2</sub> ([M+H]<sup>+</sup>): 235.1441. Found: 235.1438.

### 3-(Prop-2-en-1-yl)-1,3-diazatricyclo[6.3.1.0<sup>4,12</sup>]dodeca-4(12),5,7-trien-2-one **4**

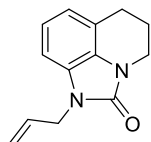

General Procedure B was followed starting with urea **3** (51.2 mg, 0.219 mmol). Flash column chromatography (SiO<sub>2</sub>, hexane–EtOAc, 9:1) gave the tetrahydroquinoline (9.5 mg, 0.041 mmol, 19%) as a colourless oil. A minor side product (containing two carbon *sp*<sup>2</sup>: CH at 7.74 (d, *J* = 8.3) in <sup>1</sup>H NMR and 137.4 in <sup>13</sup>C NMR; CH at 7.11 (d, *J* = 8.3) in <sup>1</sup>H NMR and 131.2 in <sup>13</sup>C NMR) could not be separated from the product; IR ( $\nu_{\max}$  /cm<sup>-1</sup>) 3484, 2935, 1699, 1498, 1409, 1352; <sup>1</sup>H NMR (400 MHz, CDCl<sub>3</sub>)  $\delta$  = 6.95 (1H, t, *J* = 7.7), 6.85 (1H, d, *J* = 7.6), 6.80 (1H, d, *J* = 7.7), 5.91 (1H, ddt, *J* = 16.9, 10.6, 5.5), 5.27 – 5.19 (2H, m), 4.51 – 4.48 (2H, m), 3.90 – 3.86 (2H, m), 2.86 (2H, t, *J* = 6.1), 2.18 – 2.07 (2H, m); <sup>13</sup>C NMR (101 MHz, CDCl<sub>3</sub>)  $\delta$  = 153.4, 132.5, 127.9, 126.7, 120.8, 119.5, 119.4, 117.6, 106.0, 43.7, 39.2, 24.0, 22.0; HRMS (ESI<sup>+</sup>): Calculated for C<sub>13</sub>H<sub>15</sub>N<sub>2</sub>O ([M+H]<sup>+</sup>): 215.1178. Found: 215.1176.

### Ethyl 2-([3-(4-hydroxy-3-methoxyphenyl)propyl]carbamoyl)acetate **5**

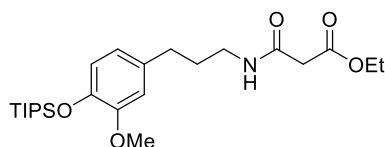

To a solution of the crude amine salt **S5** (3.22 g,  $\leq$  8.64 mmol) in CH<sub>2</sub>Cl<sub>2</sub> (60 mL) at 0 °C was successively added Et<sub>3</sub>N (2.8 mL, 20 mmol,  $\geq$  2.4 eq) and ethyl malonyl chloride (1.2 mL, 9.3 mmol,  $\geq$  1.1 eq). The reaction mixture was stirred for 2 h at rt. Saturated aqueous NH<sub>4</sub>Cl (30 mL) and H<sub>2</sub>O (20 mL) were added and the phases were separated. The aqueous phase was



extracted with CH<sub>2</sub>Cl<sub>2</sub> (2 × 40 mL). The organic extracts were washed with brine (40 mL), dried over Na<sub>2</sub>SO<sub>4</sub>, filtered and concentrated *in vacuo*. Flash column chromatography (SiO<sub>2</sub>, hexane–EtOAc, 6:4) afforded the urea **S24** as a colourless oil (2.87 g, 6.36 mmol, 74% over two steps). IR ( $\nu_{\max}$  /cm<sup>-1</sup>) 3292, 2942, 2865, 1740, 1649, 1556, 1513, 1464, 1274, 1232, 1157, 1072; <sup>1</sup>H NMR (400 MHz; CDCl<sub>3</sub>)  $\delta$  = 7.10 (1H, s), 6.71 (1H, d, *J* = 8.0), 6.60 (1H, d, *J* = 1.9), 6.54 (1H, dd, *J* = 8.0 and 1.9), 4.14 (2H, q, *J* = 7.1), 3.73 (3H, s), 3.27 – 3.21 (4H, m, includes 2H, 3.22, s), 2.52 (2H, dd, *J* = 8.1, 7.2), 1.78 (2H, app dq, *J* = 8.1, 7.2), 1.23 (3H, t, *J* = 7.1), 1.27 – 1.12 (3H, m), 1.02 (18H, d, *J* = 7.2); <sup>13</sup>C NMR (101 MHz; CDCl<sub>3</sub>)  $\delta$  = 169.9, 165.0, 150.8, 143.8, 134.5, 120.3, 120.3, 112.6, 61.6, 55.6, 41.1, 39.2, 32.9, 31.2, 18.0, 14.2, 13.0; HRMS (ESI<sup>+</sup>): Calculated for C<sub>24</sub>H<sub>42</sub>NO<sub>5</sub>Si ([M+H]<sup>+</sup>): 452.2826. Found: 452.2822.

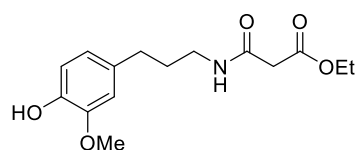

To a solution of the above malonate half-ester/half-amide **S24** (2.81 g, 6.23 mmol) in THF (20 mL) at 0 °C was added *n*Bu<sub>4</sub>NF (1M in THF, 8.2 mL, 8.2 mmol, 1.3 eq) dropwise. The reaction mixture warmed to rt and stirred for 2 h. After concentration *in vacuo* the residue was purified by flash column chromatography (SiO<sub>2</sub>, hexane–EtOAc, 2:8 to 1:9) to afford the desired phenol as a colourless oil (1.64 g, 5.56 mmol, 89%). IR ( $\nu_{\max}$  /cm<sup>-1</sup>) 3305, 2937, 1732, 1647, 1553, 1514, 1451, 1429, 1268, 1186, 1151, 1123, 1028; <sup>1</sup>H NMR (400 MHz; CDCl<sub>3</sub>)  $\delta$  = 7.19 (1H, s), 6.80 (1H, d, *J* = 8.0), 6.68 – 6.62 (2H, m), 5.74 (1H, s), 4.18 (2H, q, *J* = 7.1), 3.85 (3H, s), 3.33 – 3.26 (4H, m (includes 3.27, s)), 2.60 – 2.54 (2H, m), 1.86 – 1.77 (2H, m), 1.27 (3H, t, *J* = 7.1); <sup>13</sup>C NMR (101 MHz, CDCl<sub>3</sub>)  $\delta$  = 169.8, 165.1, 146.6, 143.9, 133.2, 120.9, 114.4, 111.1, 61.6, 55.9, 41.1, 39.1, 32.8, 31.2, 14.1; HRMS (ESI<sup>+</sup>): Calculated for C<sub>15</sub>H<sub>22</sub>NO<sub>5</sub> ([M+H]<sup>+</sup>): 296.1492. Found: 296.1488.

#### Ethyl 2-methoxy-3,6-dioxo-3*H*,4*H*,5*H*,6*H*,8*H*,9*H*,10*H*,10*bH*-cyclohexa[*h*]pyrrolizine-5-carboxylate **6**

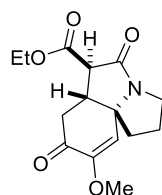

To a solution of [bis(trifluoroacetoxy)iodo]benzene (1.95 g, 4.53 mmol, 1.1 eq) in MeCN (40 mL) and H<sub>2</sub>O (50  $\mu$ L) at 0 °C was added a solution of phenol **5** (1.22 g, 4.14 mmol) in MeCN (13 mL) dropwise. The reaction mixture was stirred at 0 °C for 20 min before the addition of Et<sub>3</sub>N (1.5 mL, 10.8 mmol, 2.6 eq). The reaction mixture was concentrated *in vacuo* and the residue was partitioned between EtOAc (20 mL) and H<sub>2</sub>O (20 mL). The phases were separated and the aqueous phase was extracted with EtOAc (2 × 20 mL). The combined organic extracts were washed with brine (30 mL), dried over Na<sub>2</sub>SO<sub>4</sub>, filtered and concentrated *in vacuo*. The residue was then diluted with MeCN (20 mL) and the solution cooled to 0 °C. Cs<sub>2</sub>CO<sub>3</sub> (2.8 g, 8.5 mmol, 2.0 eq) was added and the reaction mixture was

stirred 40 min. After concentration *in vacuo*, the residue was purified by flash column chromatography (SiO<sub>2</sub>, hexane–EtOAc, 1:9) gave the desired product (596 mg, 2.03 mmol, 49%) as a colourless solid. A suitable crystal was obtained for X-Ray crystallography. mp (hexane–EtOAc): 168–170 °C; IR ( $\nu_{\text{max}}/\text{cm}^{-1}$ ) 2939, 1736, 1686, 1626, 1463, 1351, 1324, 1304, 1179, 1146, 1076; <sup>1</sup>H NMR (400 MHz, CDCl<sub>3</sub>)  $\delta$  = 5.45 (1H, d,  $J$  = 1.3), 4.23 – 4.14 (2H, m), 3.80 – 3.72 (1H, m), 3.58 (3H, s), 3.51 (1H, d,  $J$  = 12.4), 3.17 – 3.03 (2H, m), 2.76 (1H, dd,  $J$  = 17.6, 5.8), 2.59 (1H, dd,  $J$  = 17.6, 1.9), 2.25 – 1.97 (4H, m), 1.24 (3H, t,  $J$  = 7.1); <sup>13</sup>C NMR (101 MHz, CDCl<sub>3</sub>)  $\delta$  = 190.1 (COOEt), 168.4, 168.1, 149.6, 114.6, 66.9, 61.8, 55.9, 55.0, 44.9, 42.5, 36.9, 36.5, 26.1, 14.1; HRMS (ESI<sup>+</sup>): Calculated for C<sub>15</sub>H<sub>20</sub>NO<sub>5</sub> ([M+H]<sup>+</sup>): 294.1335. Found: 294.1331.

## Functional group manipulations on dearomatised products: Scheme 2

### 6-Isopropylhexahydro-1*H*,5*H*-benzo[*d*]pyrrolo[1,2-*c*]imidazole-5,8(6*H*)-dione **7**

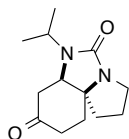

To a solution of the enone **2c** (197 mg, 0.84 mmol, 1.0 eq.) and tris(triphenyl)rhodium(I) chloride (15.6 mg, 16.9  $\mu$ mol, 2.0 mol%) in 5 mL THF, 6 mL of TES was added. The mixture was stirred at room temperature for 24 h. 0.05 mL of 1M HCl was then added and the mixture was stirred at room temperature for 1 h and evaporated *in vacuo*. Flash chromatography eluting with 50 – 100% EtOAc in hexane afforded the product **7** (167 mg, 0.71 mmol, 85%). IR  $\nu_{\max}$  (neat)/ $\text{cm}^{-1}$ : 2967, 1682.  $^1\text{H}$  NMR (300 MHz, MeOD)  $\delta$  = 4.03 (1H, dd,  $J$  = 5.1, 3.2), 3.71 (1H, hept,  $J$  = 6.9), 3.53 (1H, ddd,  $J$  = 12.0, 6.0, 3.3), 2.92 (1H, ddd,  $J$  = 12.0, 5.7, 3.6), 2.83 (1H, dd,  $J$  = 15.5, 5.3), 2.50 (1H, dd,  $J$  = 15.5, 3.1), 2.31 – 2.22 (2H, m), 2.03 (1H, ddd,  $J$  = 14.5, 10.1, 6.5), 1.95 – 1.78 (4H, m), 1.65 – 1.52 (1H, m), 1.14 (3H, d,  $J$  = 6.9), 1.12 (3H, d,  $J$  = 6.9).  $^{13}\text{C}$  NMR (75 MHz, MeOD)  $\delta$  = 213.1, 164.9, 66.6, 60.0, 46.3, 45.3, 43.6, 38.0, 36.1, 29.5, 24.6, 21.4, 19.5. HRMS (ESI):  $\text{C}_{13}\text{H}_{21}\text{N}_2\text{O}_2$  [ $\text{M} + \text{H}^+$ ]: calculated 237.1598, found 237.1595.

### 6-(4-Toluenesulfonyl)hexahydro-1*H*,5*H*-benzo[*d*]pyrrolo[1,2-*c*]imidazole-5,8(6*H*)-dione **8**

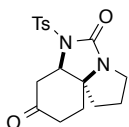

To a mixture of  $\text{Pd}(\text{OH})_2/\text{C}$  (27.0 mg, 20% w/w) and enone **2f** (133 mg, 0.38 mmol, 1.0 eq.) under an atmosphere of nitrogen, 10 mL of HPLC grade EtOAc was added gently. The reaction mixture was degassed and hydrogen gas was bubbled through it with the aid of a balloon, and this procedure was repeated twice. The mixture was then allowed to stir under a balloon of hydrogen for 27 h at room temperature. The reaction mixture was filtered through a plug of Celite washing with 100 mL EtOAc. The filtrate was evaporated *in vacuo*. Flash chromatography eluting with 50 - 90% EtOAc in hexane afforded the product **8** as a white solid (111 mg, 0.32 mmol, 83%); IR  $\nu_{\max}$  (neat)/ $\text{cm}^{-1}$ : 2959, 1718, 1596, 1494, 1455, 1352.  $^1\text{H}$  NMR  $\delta$  (400 MHz,  $\text{CDCl}_3$ )  $\delta$  = 7.83 (2H, d,  $J$  = 8.4), 7.32 (2H, d,  $J$  = 8.8), 4.56 (1H, dd,  $J$  = 5.2, 3.8), 3.66 (1H, ddd,  $J$  = 12.0, 5.6, 3.2), 3.13 (1H, dd,  $J$  = 16.3, 3.7), 2.94 (1H, ddd,  $J$  = 12.1, 9.2, 4.9), 2.84 (1H, dd,  $J$  = 16.3, 5.3), 2.35 (3H, s), 2.34 - 2.18 (2H, m), 2.03 – 1.79 (5H, m), 1.59-1.50 (1H, m).  $^{13}\text{C}$  NMR (100 MHz,  $\text{CDCl}_3$ )  $\delta$  = 208.1, 156.6, 145.0, 135.4, 129.6, 128.4, 65.1, 59.4, 43.6, 42.9, 37.1, 34.8, 28.4, 23.5, 21.7. HRMS (ESI):  $\text{C}_{17}\text{H}_{21}\text{N}_2\text{O}_4\text{S}$  [ $\text{M} + \text{H}^+$ ]: calculated 349.1217, found 349.1217.

### 6-(4-Methoxyphenyl)hexahydro-1*H*,5*H*-benzo[*d*]pyrrolo[1,2-*c*]imidazole-5,8(6*H*)-dione **9**

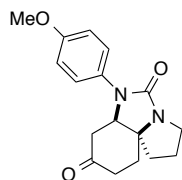

To a mixture of Pd(OH)<sub>2</sub>/C (20.8 mg, 20% w/w) and enone **2i** (104 mg, 0.35 mmol, 1.0 eq.) under an atmosphere of nitrogen, 10 mL of HPLC grade EtOAc was added gently. The reaction mixture was degassed and hydrogen gas was bubbled through it with the aid of a balloon, and this procedure was repeated twice. The mixture was then allowed to stir under a balloon of hydrogen for 23 h at room temperature. The reaction mixture was filtered through a plug of Celite washing with 100 mL EtOAc. The filtrate was evaporated *in vacuo*. Flash chromatography eluting with 2 - 4% MeOH in DCM afforded the product **9** as a brown solid (72 mg, 0.24 mmol, 69%); IR  $\nu_{\max}$  (neat)/cm<sup>-1</sup>: 2998, 2953, 2891, 1710, 1617, 1586, 1516, 1406. <sup>1</sup>H NMR (500 MHz, CDCl<sub>3</sub>)  $\delta$  = 7.04 (2H, d, *J* = 9.0), 6.81 (2H, d, *J* = 9.0), 4.35 (1H, t, *J* = 4.0), 3.76 (1H, ddd, *J* = 11.5, 5.5, 3.5), 3.71 (3H, s), 3.07 (1H, ddd, *J* = 11.5, 6.0, 3.5), 2.60 – 2.54 (2H, m), 2.54 -2.49 (1H, m), 2.31 (1H, dt, *J* = 19.0, 3.9), 2.03 – 1.89 (5H, m), 1.80 (1H, ddd, *J* = 16.0, 9.5, 3.5). <sup>13</sup>C NMR (125 MHz, CDCl<sub>3</sub>)  $\delta$  = 208.2, 160.0, 156.3, 128.9, 124.3, 113.6, 63.2, 60.0, 54.5, 43.5, 39.4, 37.4, 34.2, 28.7, 23.4. HRMS (ESI): C<sub>17</sub>H<sub>21</sub>N<sub>2</sub>O<sub>3</sub> [M + H<sup>+</sup>]: calculated 301.1547, found 301.1544.

#### 8-Hydroxy-6-isopropyloctahydro-1*H*,5*H*-benzo[*d*]pyrrolo[1,2-*c*]imidazol-5-one **10**

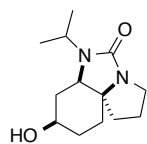

A mixture of the ketone **7** (24.0 mg, 0.10 mmol, 1.0 eq.) and CeCl<sub>3</sub>·7H<sub>2</sub>O (45.5 mg, 0.12 mmol, 1.2 eq.) in 3 mL of HPLC grade MeOH and it was allowed to stir at -78 °C for 30 min. NaBH<sub>4</sub> (4.62 mg, 0.12 mmol, 1.2 eq.) was then added and the mixture was left to warm up to room temperature for another 30 min. The reaction mixture was evaporated *in vacuo*. It was then taken up in 1 mL H<sub>2</sub>O, diluted with 50 mL EtOAc, dried over Na<sub>2</sub>SO<sub>4</sub> and evaporated *in vacuo*. Flash chromatography with 1 – 4% MeOH in DCM afforded the product **10** as a single diastereomer (22.0 mg, 0.09 mmol, 92% yield). IR  $\nu_{\max}$  (neat)/cm<sup>-1</sup>: 3399, 2937, 1666, 1056. <sup>1</sup>H NMR (500 MHz, CDCl<sub>3</sub>)  $\delta$  = 3.99 (1H, hept, *J* = 7.0), 3.78 (1H, ddd, *J* = 12.4, 9.2, 5.2), 3.57 (1H, tt, *J* = 10.5, 4.0), 3.44 (1H, dd, *J* = 10.1, 6.5), 2.85 (1H, ddd, *J* = 12.0, 6.0, 3.0), 2.33 (1H, dddd, *J* = 12.7, 6.5, 4.3, 2.2), 2.13 (1H, s), 1.85 (1H, dt, *J* = 14.5, 4.0), 1.80 – 1.63 (3H, m), 1.50 – 1.34 (4H, m), 1.31 – 1.23 (1H, m), 1.14 (3H, d, *J* = 7.0), 1.11 (3H, d, *J* = 6.5). <sup>13</sup>C NMR (125 MHz, CDCl<sub>3</sub>)  $\delta$  = 162.6, 66.2, 64.5, 53.6, 43.2, 43.0, 40.8, 33.6, 29.6, 28.1, 21.9, 21.4, 18.8. HRMS (ESI): C<sub>13</sub>H<sub>23</sub>N<sub>2</sub>O<sub>2</sub> [M + H<sup>+</sup>]: calculated 239.1754, found 239.1750.

#### Preparation of crystalline derivative of **10**: 6-isopropyl-5-oxooctahydro-1*H*,5*H*-benzo[*d*]pyrrolo[1,2-*c*]imidazol-8-yl (3-fluorophenyl)carbamate **S25**

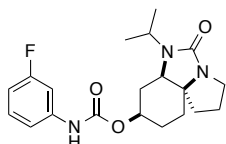

A mixture of the ketone **7** (27.0 mg, 0.11 mmol, 1.0 eq.) and  $\text{CeCl}_3 \cdot 7\text{H}_2\text{O}$  (51.0 mg, 0.14 mmol, 1.2 eq.) in 3 mL of HPLC grade MeOH was allowed to stir at  $-78^\circ\text{C}$  for 30 min.  $\text{NaBH}_4$  (5.18 mg, 0.14 mmol, 1.2 eq.) was then added and the mixture was left to warm up to room temperature for another 30 min. The reaction mixture was evaporated *in vacuo*. It was then taken up in 1 mL  $\text{H}_2\text{O}$ , diluted with 50 mL EtOAc, dried over  $\text{Na}_2\text{SO}_4$  and evaporated *in vacuo*. To a solution of the crude product in 5 mL DCM, 3-fluorophenylisocyanate (13  $\mu\text{L}$ , 0.11 mmol, 1.0 eq.) and TEA (0.05 mL, 0.34 mmol, 3.0 eq.) were added and the mixture was stirred at room temperature overnight. The reaction mixture was evaporated *in vacuo*. Flash chromatography with 1 – 4% MeOH in DCM afforded the carbamate as a diastereomeric mixture in the ratio of 93:7 (36 mg, 0.10 mmol, 84% yield). Crystals of the major diastereomer were grown for X-ray analysis. IR  $\nu_{\text{max}}$  (neat)/ $\text{cm}^{-1}$ : 3254 (N-H); 3076, 2968 (C-H); 1723, 1671 (C=O); 1606, 1546, 1495 (C=C); 1221 (C-O).  $^1\text{H}$  NMR (Major diastereomer, 500 MHz,  $\text{CDCl}_3$ )  $\delta$  = 7.30 (1H, d,  $J$  = 10.6), 7.17 (1H, td,  $J$  = 8.2, 6.6), 7.00 (1H, d,  $J$  = 8.0), 6.68 (1H, td,  $J$  = 8.3, 2.3), 4.69 (1H, tt,  $J$  = 10.8, 4.0), 3.99 (1H, hept,  $J$  = 6.9), 3.79 (1H, ddd,  $J$  = 12.4, 9.3, 5.2), 3.52 (1H, dd,  $J$  = 9.9, 6.5), 2.86 (1H, ddd,  $J$  = 12.5, 7.0, 4.0), 2.43 – 2.36 (1H, m), 1.88 (1H, dt,  $J$  = 15.0, 4.0), 1.85 – 1.80 (1H, m), 1.77 (1H, ddd,  $J$  = 12.5, 6.0, 3.0), 1.75 – 1.66 (1H, m), 1.62 – 1.40 (4H, m), 1.37 (1H, ddd,  $J$  = 14.6, 10.8, 4.7), 1.14 (3H, d,  $J$  = 6.9), 1.12 (3H, d,  $J$  = 6.9). Signals for minor isomer visible at: 5.06 (0.07H, quint,  $J$  = 4.5), 3.70 (0.07H, dd,  $J$  = 8.2, 5.7).  $^{13}\text{C}$  NMR (Major diastereomer, 125 MHz,  $\text{CDCl}_3$ )  $\delta$  = 162.6, 162.2 (d,  $J$  = 243.0), 151.8, 138.7 (d,  $J$  = 13.2), 129.1 (d,  $J$  = 9.5), 112.8, 108.9, 104.9 (d,  $J$  = 26.8), 69.3, 64.4, 53.2, 43.3, 43.0, 36.9, 33.6, 27.6, 26.0, 21.9, 21.4, 18.7. Signals for minor isomer visible at: 52.1, 34.4, 25.1, 24.1, 22.2, 21.2. HRMS (ESI):  $\text{C}_{20}\text{H}_{27}\text{FN}_3\text{O}_3$  [ $\text{M} + \text{H}^+$ ]: calculated 376.2031, found 376.2028.

#### 8-Hydroxy-6-(4-toluenesulfonyl)octahydro-1H,5H-benzo[d]pyrrolo[1,2-c]imidazol-5-one **11**

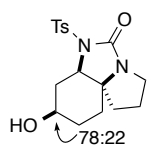

A mixture of the ketone **8** (18.0 mg, 0.05 mmol, 1.0 eq.) and  $\text{CeCl}_3 \cdot 7\text{H}_2\text{O}$  (23.2 mg, 0.06 mmol, 1.2 eq.) in 3 mL of HPLC grade MeOH was allowed to stir at  $-78^\circ\text{C}$  for 30 min.  $\text{NaBH}_4$  (2.40 mg, 0.06 mmol, 1.2 eq.) was then added and the mixture was left to warm up to room temperature for another 30 min. The reaction mixture was evaporated *in vacuo*. It was then taken up in 1 mL  $\text{H}_2\text{O}$ , diluted with 50 mL EtOAc, dried over  $\text{Na}_2\text{SO}_4$  and evaporated *in vacuo*. Flash chromatography with 1 – 2% MeOH in DCM afforded the product **11** as a 78:22 mixture of diastereomers (15.0 mg, 0.04 mmol, 83% yield). IR  $\nu_{\text{max}}$  (neat)/ $\text{cm}^{-1}$ : 3388, 2922, 2852, 1727, 1658, 1597, 1161.  $^1\text{H}$  NMR (Major diastereomer, 500 MHz,  $\text{CDCl}_3$ )  $\delta$  = 7.87 (2H, d,  $J$  = 8.5), 7.24 (2H, d,  $J$  = 8.5), 4.17 (1H, dd,  $J$  = 10.0, 6.4), 3.74 – 3.61 (2H, m, 8-H), 2.89 (1H, ddd,  $J$  = 12.1, 9.4, 5.7), 2.67 (1H, dddd,  $J$  = 12.8, 6.4, 4.5, 1.9), 2.35 (3H, s), 1.86 – 1.70 (4H, m), 1.60 – 1.24 (6H, m). Signals for minor isomer visible at: 4.29 (0.29H, dd,  $J$  = 8.0, 5.5), 4.09

(0.29H, quint,  $J = 5.0$ ).  $^{13}\text{C}$  NMR (Major diastereomer, 125 MHz,  $\text{CDCl}_3$ )  $\delta = 158.4, 144.8, 136.2, 129.6, 128.2, 66.4, 65.1, 57.7, 44.0, 39.4, 34.4, 30.0, 28.2, 22.9, 21.7$ . Signals for minor isomer visible at: 158.1, 144.7, 136.1, 129.5, 128.1, 65.4, 63.9, 57.3, 43.8, 36.7, 35.2, 27.6, 25.3, 23.0. HRMS (ESI):  $\text{C}_{17}\text{H}_{23}\text{N}_2\text{O}_4\text{S}$  [ $\text{M} + \text{H}^+$ ]: calculated 351.1373, found 351.1369.

### 8-Hydroxy-6-(4-methoxyphenyl)octahydro-1*H*,5*H*-benzo[*d*]pyrrolo[1,2-*c*]imidazol-5-one **12**

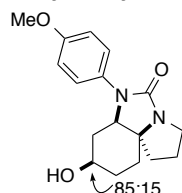

A mixture of the ketone **9** (30.0 mg, 0.10 mmol, 1.0 eq.) and  $\text{CeCl}_3 \cdot 7\text{H}_2\text{O}$  (44.7 mg, 0.12 mmol, 1.2 eq.) in 3 mL of HPLC grade MeOH was allowed to stir at  $-78^\circ\text{C}$  for 30 min.  $\text{NaBH}_4$  (4.54 mg, 0.12 mmol, 1.2 eq.) was then added and the mixture was left to warm up to room temperature for another 30 min. The reaction mixture was evaporated *in vacuo*. It was then taken up in 1 mL  $\text{H}_2\text{O}$ , diluted with 50 mL EtOAc, dried over  $\text{Na}_2\text{SO}_4$  and evaporated *in vacuo*. Flash chromatography with 1 – 3% MeOH in DCM afforded the product **12** as an 85:15 mixture of diastereomers (29.0 mg, 0.10 mmol, 96% yield). IR  $\nu_{\text{max}}$  (neat)/ $\text{cm}^{-1}$ : 3398, 2934, 1674, 1582, 1510, 1462, 1244.  $^1\text{H}$  NMR (Major diastereomer, 500 MHz,  $\text{CDCl}_3$ )  $\delta = 7.27$  (2H, d,  $J = 9.0$ ), 6.80 (2H, d,  $J = 9.5$ ), 3.96 (1H, dd,  $J = 9.5, 6.2$ ), 3.85 (1H, ddd,  $J = 12.3, 9.0, 5.5$ ), 3.72 (3H, s), 3.65 (1H, qd,  $J = 9.0, 4.3$ ), 2.99 (1H, ddd,  $J = 12.0, 6.0, 3.0$ ), 2.24 (1H, dddd,  $J = 12.7, 6.2, 4.5, 1.9$ ), 1.91 (1H, dt,  $J = 14.5, 4.0$ ), 1.89 – 1.73 (6H, m), 1.49 (1H, tdd,  $J = 12.9, 9.4, 3.6$ ), 1.41 – 1.36 (1H, m), 1.36 – 1.31 (1H, m). Signals for minor isomer visible at: 4.15 (0.17H, dd,  $J = 6.5, 5.5$ ), 4.03 (0.18H, quint,  $J = 5.5$ ).  $^{13}\text{C}$  NMR (Major diastereomer, 125 MHz,  $\text{CDCl}_3$ )  $\delta = 162.0, 156.4, 131.4, 123.4, 114.4, 69.9, 64.4, 58.4, 55.5, 44.3, 38.0, 35.4, 30.5, 29.0, 23.2$ . Signals for minor isomer visible at: 64.6, 64.0, 57.7, 36.3, 33.9, 28.4, 26.6, 23.7. HRMS (ESI):  $\text{C}_{17}\text{H}_{23}\text{N}_2\text{O}_3$  [ $\text{M} + \text{H}^+$ ]: calculated 303.1703, found 303.1698.

### 6-Isopropyl-8-(methylamino)octahydro-1*H*,5*H*-benzo[*d*]pyrrolo[1,2-*c*]imidazol-5-one **13**

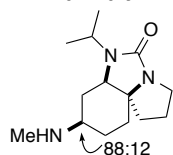

To a solution of the ketone **7** (22.0 mg, 0.09 mmol, 1.0 eq.) in 6 mL THF, 33 wt% methylamine in EtOH (0.10 mL, 0.93 mmol, 10.0 eq.) and titanium isopropoxide (0.06 mL, 0.19 mmol, 2.0 eq.) were added and the mixture was left to stir at room temperature overnight.  $\text{NaBH}_4$  (5.30 mg, 0.14 mmol, 1.5 eq.) was added to the reaction mixture at  $-78^\circ\text{C}$  and it was stirred at the same temperature for 30 min. It was then allowed to warm up to room temperature for another 30 min. The reaction mixture was evaporated *in vacuo*. It was then taken up in 1 mL  $\text{H}_2\text{O}$ , diluted with 50 mL EtOAc, dried over  $\text{MgSO}_4$  and evaporated *in vacuo*. Flash chromatography with 5% MeOH in DCM, followed by 99:9:1 of DCM/MeOH/aq.  $\text{NH}_3$  respectively, afforded the product **13** as a diastereomeric mixture in the ratio of 88:12 (21.0 mg, 0.08 mmol, 90% yield). IR  $\nu_{\text{max}}$  (neat)/ $\text{cm}^{-1}$ : 3306, 2966, 2936, 2791, 1686.  $^1\text{H}$  NMR

(Major diastereomer, 500 MHz, CDCl<sub>3</sub>)  $\delta$  = 3.98 (1H, hept,  $J$  = 7.0), 3.77 (1H, ddd,  $J$  = 12.4, 9.2, 5.3), 3.41 (1H, dd,  $J$  = 10.4, 6.5), 2.84 (1H, ddd,  $J$  = 12.4, 9.3, 5.9), 2.37 – 2.31 (4H, m, 8-H), 2.26 (1H, dddd,  $J$  = 12.5, 6.1, 3.7, 2.2), 1.88 – 1.82 (1H, m), 1.77 – 1.65 (4H, m), 1.44 – 1.34 (2H, m), 1.29 – 1.15 (3H, m), 1.14 (3H, d,  $J$  = 7.0), 1.11 (3H, d,  $J$  = 7.0). Signals for minor isomer visible at: 3.69 (0.14H, ddd,  $J$  = 12.1, 8.8, 6.0), 3.61 (0.13H, t,  $J$  = 5.5). <sup>13</sup>C NMR (Major diastereomer, 125 MHz, CDCl<sub>3</sub>)  $\delta$  = 162.6, 64.9, 54.0, 53.7, 43.2, 43.0, 38.4, 33.8, 32.3, 28.8, 26.4, 21.9, 21.5, 18.7. Signals for minor isomer visible at: 162.4, 64.8, 53.8, 43.3, 34.8, 32.8, 25.3, 24.4, 22.2, 21.2, 18.5. HRMS (ESI): C<sub>14</sub>H<sub>26</sub>N<sub>3</sub>O [M + H<sup>+</sup>]: calculated 252.2070, found 252.2079.

**8-Hydroxy-6-isopropyl-2,3,6,6a,7,8-hexahydro-1H,5H-benzo[d]pyrrolo[1,2-c]imidazol-5-one 14**

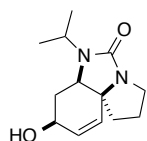

A mixture of enone **2c** (186 mg, 0.79 mmol, 1.0 eq.) and CeCl<sub>3</sub>·7H<sub>2</sub>O (354 mg, 0.95 mmol, 1.2 eq.) in 4 mL of HPLC grade methanol was allowed to stir for 30 min at -78 °C after which NaBH<sub>4</sub> (35.9 mg, 0.95 mmol, 1.2 eq.) was added and the mixture was further stirred at the same temperature for 40 min. The reaction mixture was then allowed to warm up to room temperature for 1 h. It was extracted with EtOAc (5 × 20mL), dried over MgSO<sub>4</sub> and evaporated *in vacuo*. Silica gel chromatography eluting with 70 – 90% EtOAc in hexane afforded the compound **14** as a white solid (173 mg, 0.73 mmol, 92% yield); IR  $\nu_{\max}$  (neat)/cm<sup>-1</sup>: 3369, 2971, 2937, 1666, 1416, 1223. <sup>1</sup>H NMR (300 MHz, MeOD)  $\delta$  = 5.87 (1H, dt,  $J$  = 10.2, 1.3), 5.67 (1H, dd,  $J$  = 10.2, 2.2), 4.21 (1H, ddd,  $J$  = 10.8, 4.5, 2.4), 3.96 (1H, hept,  $J$  = 6.9), 3.79 (1H, dd,  $J$  = 12.0, 5.1), 3.71 (1H, ddd,  $J$  = 12.3, 5.7, 3.0), 3.04 (1H, ddd,  $J$  = 12.2, 9.2, 5.7), 2.44 (1H, dtd,  $J$  = 11.2, 4.8, 1.4), 2.04 – 1.79 (2H, m), 1.69 (1H, ddd,  $J$  = 12.3, 7.8, 2.6), 1.61 – 1.40 (2H, m), 1.28 (3H, d,  $J$  = 6.9), 1.26 (3H, d,  $J$  = 6.6). <sup>13</sup>C NMR (75 MHz, MeOD)  $\delta$  = 164.5, 134.7, 127.0, 65.8, 65.5, 56.0, 46.1, 45.3, 39.8, 36.3, 23.6, 22.4, 19.6. HRMS (ESI): C<sub>13</sub>H<sub>21</sub>N<sub>2</sub>O<sub>2</sub> [M + H<sup>+</sup>]: calculated 237.1598, found 237.1598.

**Methyl (5S',6R')-6-(4-methylbenzenesulfonamido)-8-oxo-1-azaspiro[4.5]decane-1-carboxylate 15**

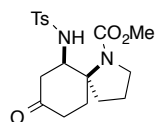

The enone **2f** (1.2 g, 3.5 mmol) was hydrogenated using palladium on carbon (10%, 120 mg) in methanol (40 mL), this gave the ketone **8** (1.21 g) as a foam which was not purified further. Sodium methoxide (100 mg, 1.85 mmol) was added to a solution of ketone (80 mg, <0.23 mmol) in toluene (2 mL); the solution was stirred at room temperature for 30 mins and then heated to 80 °C for 1 h. The reaction was cooled to room temperature, HCl (1M aq., 2 mL) was added and the reaction extracted with EtOAc (5 × 5 mL), dried, filtered and concentrated *in vacuo*. Column chromatography, eluting with EtOAc-hexanes (50:50) gave

the ketone **15** (74 mg, 0.184 mmol, 80%) as a colourless glass;  $^1\text{H}$  NMR (500 MHz; DMSO)  $\delta$  = 7.65 (2H, d,  $J$  = 8.3), 7.56 (1H, d,  $J$  = 5.3), 7.40 (2H, d,  $J$  = 8.3), 3.59 (3H, s), 3.55 (1H, dd,  $J$  = 10.6 and 4.9), 3.29 (1H, dt,  $J$  = 10.0 and 8.0), 2.85 (1H, td,  $J$  = 13.6, 13.2, 4.8), 2.73 (1H, br s), 2.60 (1H, dd,  $J$  = 15.9, 4.9), 2.55-2.49 (1H, m), 2.45–2.25 (3H, m), 2.41 (3H, s), 1.83 (1H, ddd,  $J$  = 12.8, 9.8, 6.9), 1.75 – 1.56 (3H, m);  $^{13}\text{C}$  NMR (126 MHz; DMSO)  $\delta$  = 207.9, 156.3, 143.0, 136.6, 129.5, 126.5, 65.2, 57.6, 52.4, 48.1, 45.8, 37.9, 37.1, 29.3, 20.9; IR ( $\nu_{\text{max}}$  / $\text{cm}^{-1}$ ) 3319, 2943, 2831, 1667, 1450, 1378, 1325, 1021, 736, 564; HRMS (ESI $^+$ ): Calculated for  $\text{C}_{18}\text{H}_{22}\text{N}_2\text{NaO}_5\text{S}$  ( $[\text{M}+\text{Na}]^+$ ): 403.1304. Found: 403.1305.

## References

- (1) Padiya, K. J.; Gavade, S.; Kardile, B.; Tiwari, M.; Bajare, S.; Mane, M.; Gaware, V.; Varghese, S.; Harel, D.; Kurhade, S. Unprecedented "In Water" Imidazole Carbonylation: Paradigm Shift for Preparation of Urea and Carbamate. *Org. Lett.* **2012**, *14*, 2814-2817.
- (2) Pouységu, L.; Avellan, A.-V.; Quideau, S. Iodine(III)-Mediated Generation of Nitrogen-Tethered Orthoquinolyl Acetates for the Construction of Oxygenated Indole, Quinoline, and Phenanthridine Alkaloid Motifs. *J. Org. Chem.* **2002**, *67*, 3425-3436.



### X-ray structure of compound 2f

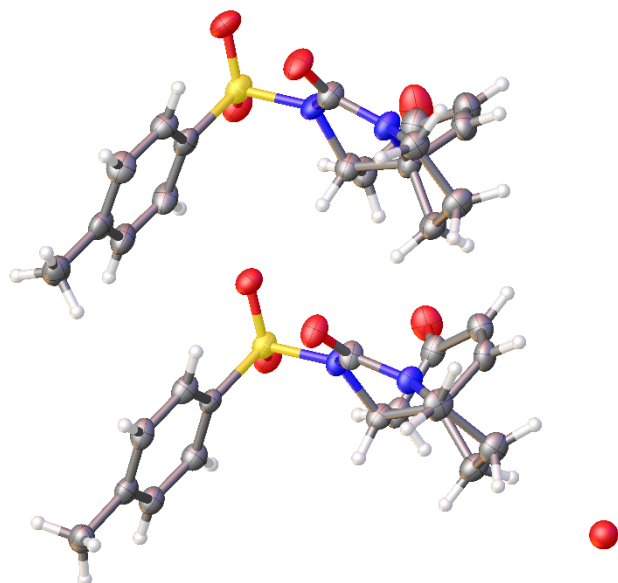

CCDC deposition number: 2174965

|                                             |                                                                       |
|---------------------------------------------|-----------------------------------------------------------------------|
| Empirical formula                           | C <sub>17</sub> H <sub>18.13</sub> N <sub>2</sub> O <sub>4.06</sub> S |
| Formula weight                              | 347.52                                                                |
| Temperature/K                               | 125.01(10)                                                            |
| Crystal system                              | monoclinic                                                            |
| Space group                                 | C2/c                                                                  |
| a/Å                                         | 21.9810(18)                                                           |
| b/Å                                         | 8.5032(5)                                                             |
| c/Å                                         | 34.011(3)                                                             |
| α/°                                         | 90                                                                    |
| β/°                                         | 91.007(7)                                                             |
| γ/°                                         | 90                                                                    |
| Volume/Å <sup>3</sup>                       | 6355.9(8)                                                             |
| Z                                           | 16                                                                    |
| ρ <sub>calc</sub> /cm <sup>3</sup>          | 1.453                                                                 |
| μ/mm <sup>2</sup>                           | 2.037                                                                 |
| F(000)                                      | 2922.0                                                                |
| Crystal size/mm <sup>3</sup>                | 0.22 × 0.04 × 0.04                                                    |
| Radiation                                   | CuKα (λ = 1.54184)                                                    |
| 2θ range for data collection/°              | 8.046 to 147.086                                                      |
| Index ranges                                | -27 ≤ h ≤ 25, -10 ≤ k ≤ 8, -31 ≤ l ≤ 42                               |
| Reflections collected                       | 12352                                                                 |
| Independent reflections                     | 6240 [R <sub>int</sub> = 0.0862, R <sub>sigma</sub> = 0.1321]         |
| Data/restraints/parameters                  | 6240/0/436                                                            |
| Goodness-of-fit on F <sup>2</sup>           | 1.038                                                                 |
| Final R indexes [I ≥ 2σ (I)]                | R <sub>1</sub> = 0.0771, wR <sub>2</sub> = 0.1679                     |
| Final R indexes [all data]                  | R <sub>1</sub> = 0.1395, wR <sub>2</sub> = 0.2158                     |
| Largest diff. peak/hole / e Å <sup>-3</sup> | 0.45/-0.58                                                            |

### X-ray structure of compound 6

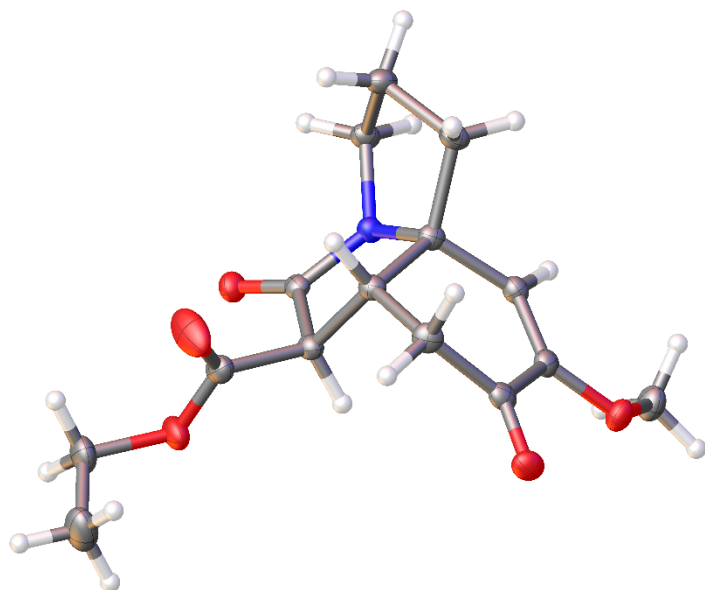

|                                             |                                                               |
|---------------------------------------------|---------------------------------------------------------------|
| CCDC deposition number:                     | 2174962                                                       |
| Empirical formula                           | C <sub>15</sub> H <sub>19</sub> NO <sub>5</sub>               |
| Formula weight                              | 293.31                                                        |
| Temperature/K                               | 120.00(15)                                                    |
| Crystal system                              | monoclinic                                                    |
| Space group                                 | P2 <sub>1</sub> /c                                            |
| a/Å                                         | 10.1141(4)                                                    |
| b/Å                                         | 7.4519(4)                                                     |
| c/Å                                         | 18.8419(8)                                                    |
| α/°                                         | 90                                                            |
| β/°                                         | 96.346(4)                                                     |
| γ/°                                         | 90                                                            |
| Volume/Å <sup>3</sup>                       | 1411.40(11)                                                   |
| Z                                           | 4                                                             |
| ρ <sub>calc</sub> /cm <sup>3</sup>          | 1.380                                                         |
| μ/mm <sup>2</sup>                           | 0.104                                                         |
| F(000)                                      | 624.0                                                         |
| Crystal size/mm <sup>3</sup>                | 0.29 × 0.26 × 0.18                                            |
| Radiation                                   | Kα (λ = 0.71073)                                              |
| 2θ range for data collection/°              | 5.884 to 62.456                                               |
| Index ranges                                | -13 ≤ h ≤ 14, -10 ≤ k ≤ 10, -24 ≤ l ≤ 27                      |
| Reflections collected                       | 19778                                                         |
| Independent reflections                     | 4269 [R <sub>int</sub> = 0.0521, R <sub>sigma</sub> = 0.0420] |
| Data/restraints/parameters                  | 4269/0/192                                                    |
| Goodness-of-fit on F <sup>2</sup>           | 1.068                                                         |
| Final R indexes [I ≥ 2σ (I)]                | R <sub>1</sub> = 0.0521, wR <sub>2</sub> = 0.1222             |
| Final R indexes [all data]                  | R <sub>1</sub> = 0.0652, wR <sub>2</sub> = 0.1309             |
| Largest diff. peak/hole / e Å <sup>-3</sup> | 0.50/-0.30                                                    |

### X-ray structure of compound 8

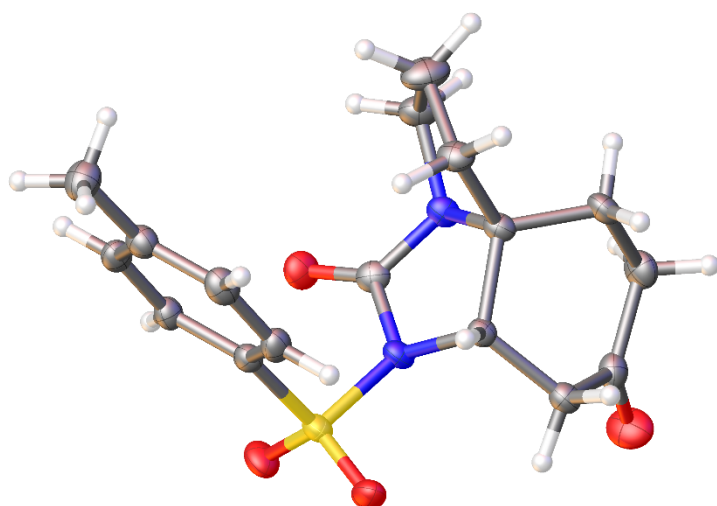

|                                             |                                                                 |
|---------------------------------------------|-----------------------------------------------------------------|
| CCDC deposition number:                     | 2174967                                                         |
| Empirical formula                           | C <sub>17</sub> H <sub>20</sub> N <sub>2</sub> O <sub>4</sub> S |
| Formula weight                              | 348.41                                                          |
| Temperature/K                               | 25.01(10)                                                       |
| Crystal system                              | tetragonal                                                      |
| Space group                                 | P4 <sub>1</sub>                                                 |
| a/Å                                         | 8.51937(12)                                                     |
| b/Å                                         | 8.51937(12)                                                     |
| c/Å                                         | 22.6198(5)                                                      |
| α/°                                         | 90                                                              |
| β/°                                         | 90                                                              |
| γ/°                                         | 90                                                              |
| Volume/Å <sup>3</sup>                       | 1641.74(6)                                                      |
| Z                                           | 4                                                               |
| ρ <sub>calc</sub> /cm <sup>3</sup>          | 1.410                                                           |
| μ/mm <sup>2</sup>                           | 1.967                                                           |
| F(000)                                      | 736.0                                                           |
| Crystal size/mm <sup>3</sup>                | 0.17 × 0.08 × 0.06                                              |
| Radiation                                   | CuKα (λ = 1.54184)                                              |
| 2θ range for data collection/°              | 10.384 to 146.892                                               |
| Index ranges                                | -10 ≤ h ≤ 10, -7 ≤ k ≤ 9, -27 ≤ l ≤ 27                          |
| Reflections collected                       | 6158                                                            |
| Independent reflections                     | 3188 [R <sub>int</sub> = 0.0412, R <sub>sigma</sub> = 0.0545]   |
| Data/restraints/parameters                  | 3188/1/218                                                      |
| Goodness-of-fit on F <sup>2</sup>           | 1.014                                                           |
| Final R indexes [I ≥ 2σ (I)]                | R <sub>1</sub> = 0.0378, wR <sub>2</sub> = 0.0852               |
| Final R indexes [all data]                  | R <sub>1</sub> = 0.0440, wR <sub>2</sub> = 0.0892               |
| Largest diff. peak/hole / e Å <sup>-3</sup> | 0.22/-0.21                                                      |
| Flack parameter                             | 0.004(19)                                                       |

### X-ray structure of S25 (urea derivative of compound 10)

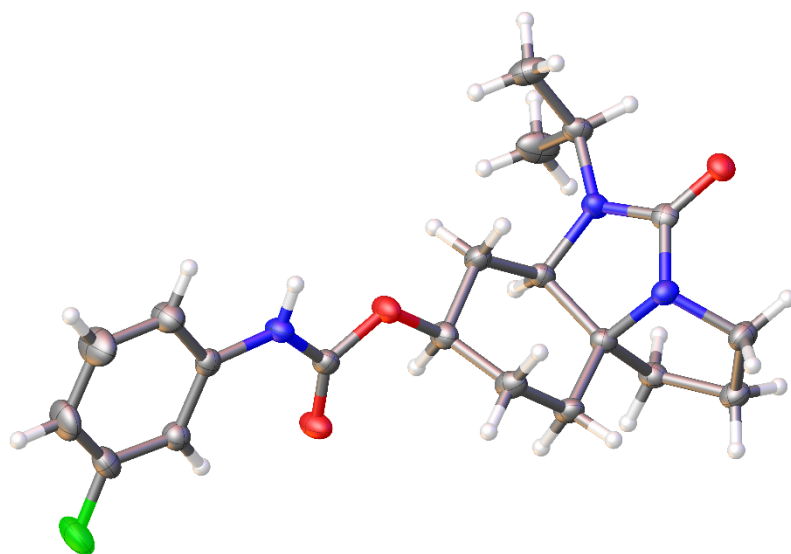

CCDC deposition number: 2175094

|                                             |                                                                |
|---------------------------------------------|----------------------------------------------------------------|
| Empirical formula                           | C <sub>20</sub> H <sub>26</sub> FN <sub>3</sub> O <sub>3</sub> |
| Formula weight                              | 375.44                                                         |
| Temperature/K                               | 120.00(18)                                                     |
| Crystal system                              | monoclinic                                                     |
| Space group                                 | P21/c                                                          |
| a/Å                                         | 11.6465(3)                                                     |
| b/Å                                         | 19.7846(5)                                                     |
| c/Å                                         | 8.73330(19)                                                    |
| α/°                                         | 90                                                             |
| β/°                                         | 103.566(2)                                                     |
| γ/°                                         | 90                                                             |
| Volume/Å <sup>3</sup>                       | 1956.20(8)                                                     |
| Z                                           | 4                                                              |
| ρ <sub>calc</sub> /cm <sup>3</sup>          | 1.275                                                          |
| μ/mm <sup>2</sup>                           | 0.766                                                          |
| F(000)                                      | 800.0                                                          |
| Crystal size/mm <sup>3</sup>                | 0.14 × 0.11 × 0.06                                             |
| Radiation                                   | CuKα (λ = 1.54184)                                             |
| 2θ range for data collection/°              | 7.808 to 146.908                                               |
| Index ranges                                | -10 ≤ h ≤ 13, -20 ≤ k ≤ 24, -10 ≤ l ≤ 9                        |
| Reflections collected                       | 8404                                                           |
| Independent reflections                     | 3763 [R <sub>int</sub> = 0.0327, R <sub>sigma</sub> = 0.0390]  |
| Data/restraints/parameters                  | 3763/0/250                                                     |
| Goodness-of-fit on F <sup>2</sup>           | 1.047                                                          |
| Final R indexes [I ≥ 2σ (I)]                | R <sub>1</sub> = 0.0402, wR <sub>2</sub> = 0.0945              |
| Final R indexes [all data]                  | R <sub>1</sub> = 0.0520, wR <sub>2</sub> = 0.1021              |
| Largest diff. peak/hole / e Å <sup>-3</sup> | 0.24/-0.20                                                     |

### X-ray structure of compound 14

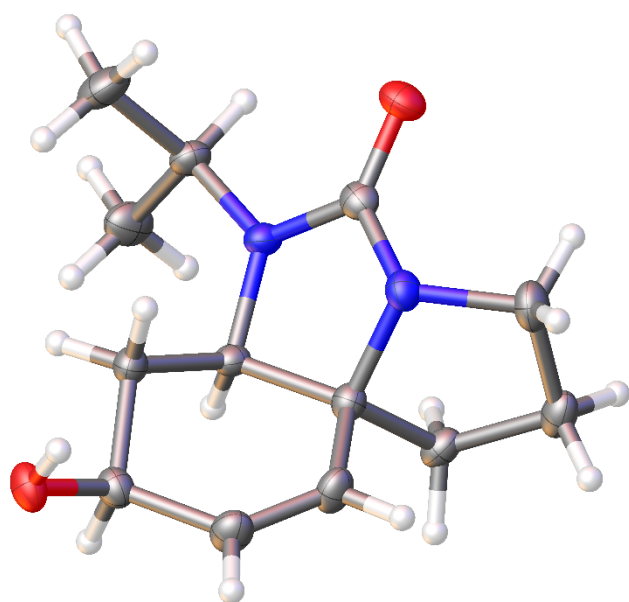

|                                             |                                                               |
|---------------------------------------------|---------------------------------------------------------------|
| CCDC deposition number:                     | 2174963                                                       |
| Empirical formula                           | C <sub>13</sub> H <sub>20</sub> N <sub>2</sub> O <sub>2</sub> |
| Formula weight                              | 236.31                                                        |
| Temperature/K                               | 125.01(10)                                                    |
| Crystal system                              | monoclinic                                                    |
| Space group                                 | P2 <sub>1</sub> /n                                            |
| a/Å                                         | 9.3232(2)                                                     |
| b/Å                                         | 15.4039(3)                                                    |
| c/Å                                         | 9.4930(2)                                                     |
| α/°                                         | 90                                                            |
| β/°                                         | 114.951(3)                                                    |
| γ/°                                         | 90                                                            |
| Volume/Å <sup>3</sup>                       | 1236.08(5)                                                    |
| Z                                           | 4                                                             |
| ρ <sub>calc</sub> /cm <sup>3</sup>          | 1.270                                                         |
| μ/mm <sup>2</sup>                           | 0.691                                                         |
| F(000)                                      | 512.0                                                         |
| Crystal size/mm <sup>3</sup>                | 0.29 × 0.21 × 0.11                                            |
| Radiation                                   | CuKα (λ = 1.54184)                                            |
| 2θ range for data collection/°              | 11.49 to 147.082                                              |
| Index ranges                                | -11 ≤ h ≤ 11, -18 ≤ k ≤ 19, -11 ≤ l ≤ 11                      |
| Reflections collected                       | 9586                                                          |
| Independent reflections                     | 2433 [R <sub>int</sub> = 0.0241, R <sub>sigma</sub> = 0.0188] |
| Data/restraints/parameters                  | 2433/0/160                                                    |
| Goodness-of-fit on F <sup>2</sup>           | 1.037                                                         |
| Final R indexes [I ≥ 2σ (I)]                | R <sub>1</sub> = 0.0379, wR <sub>2</sub> = 0.0934             |
| Final R indexes [all data]                  | R <sub>1</sub> = 0.0420, wR <sub>2</sub> = 0.0964             |
| Largest diff. peak/hole / e Å <sup>-3</sup> | 0.28/-0.19                                                    |

# $^1\text{H}$ and $^{13}\text{C}$ NMR Spectra

## 3,4-Hydroxypropanamide S1

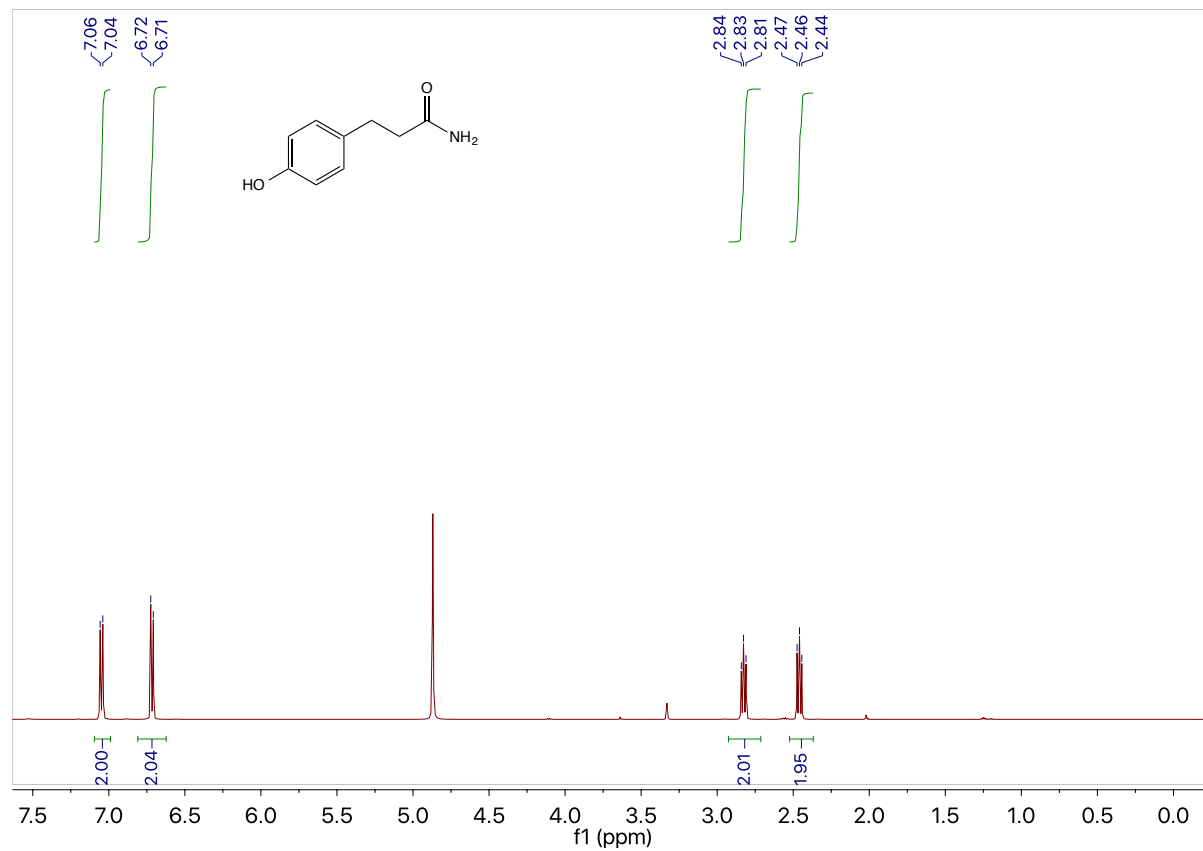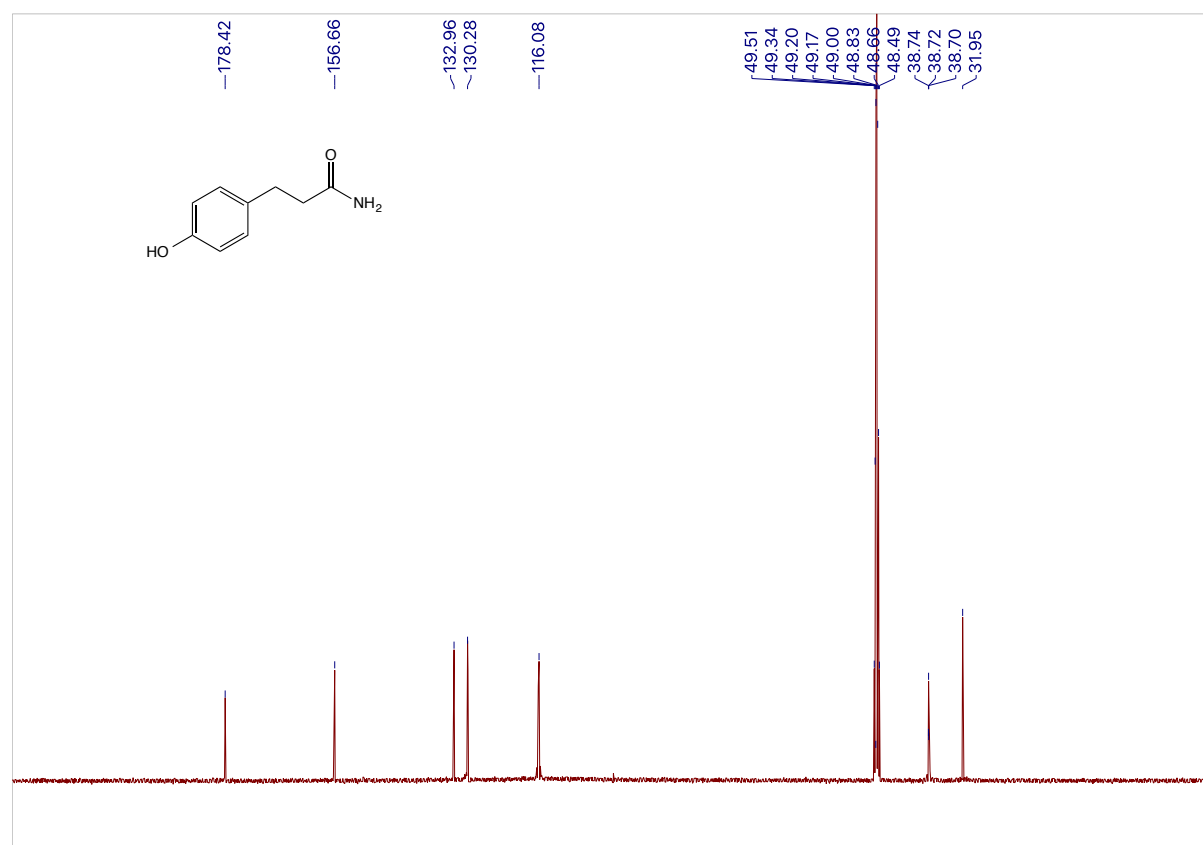

### 4-(3-Aminopropyl)phenol S2

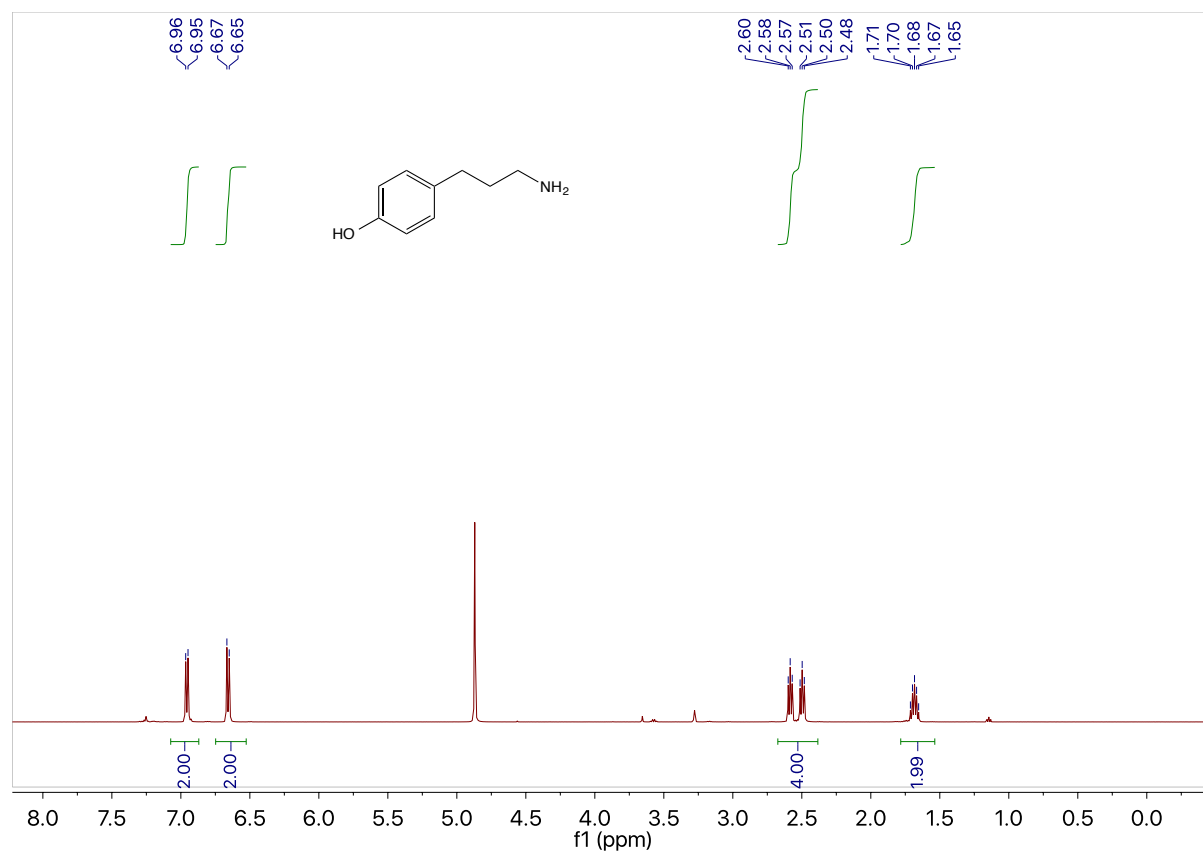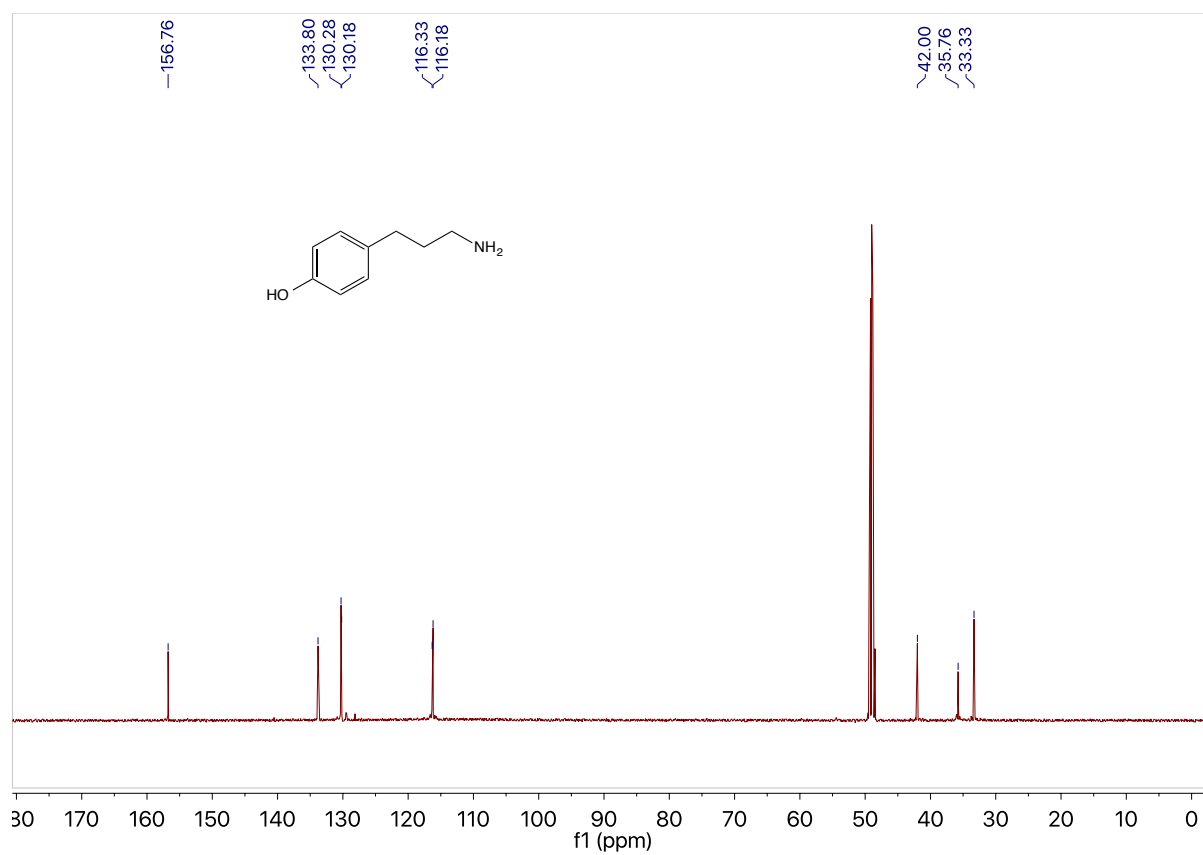

### 1-Benzyl-3-[3-(4-hydroxyphenyl)propyl]urea 1a

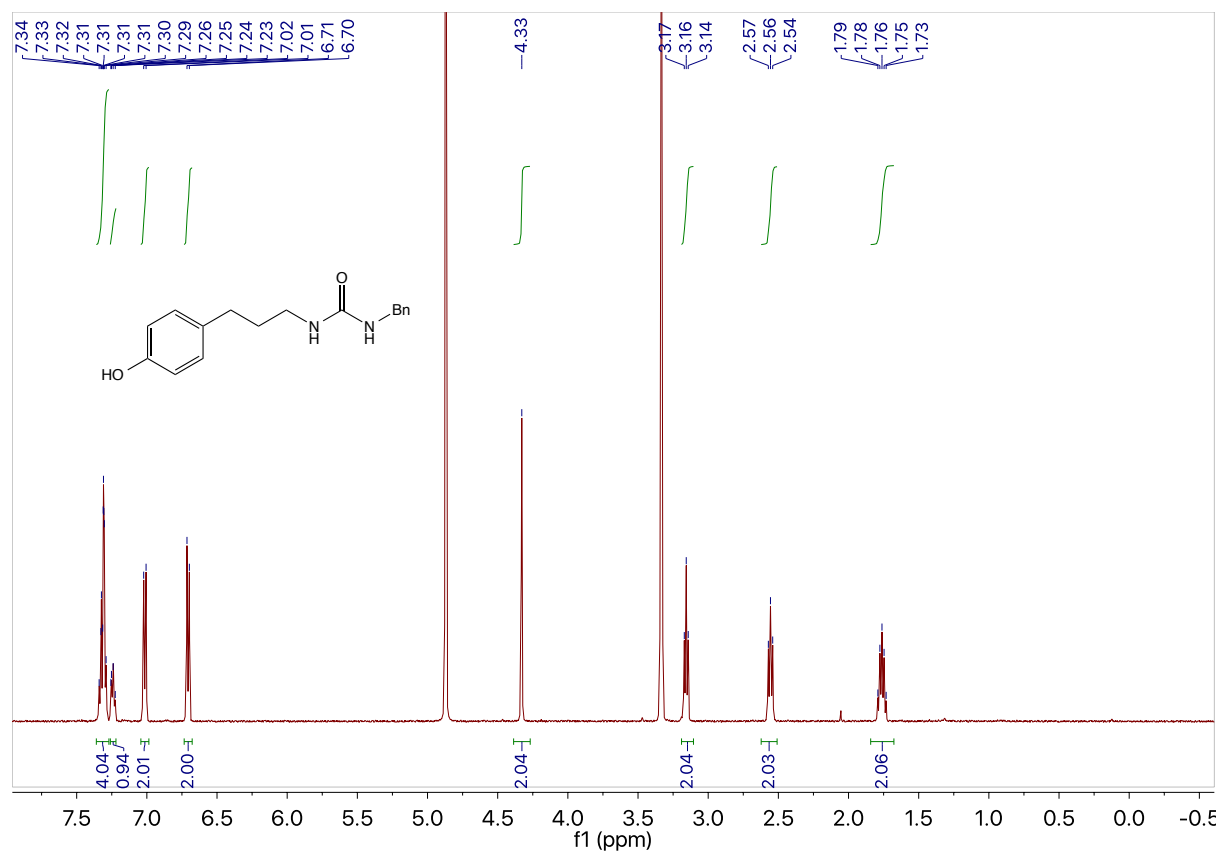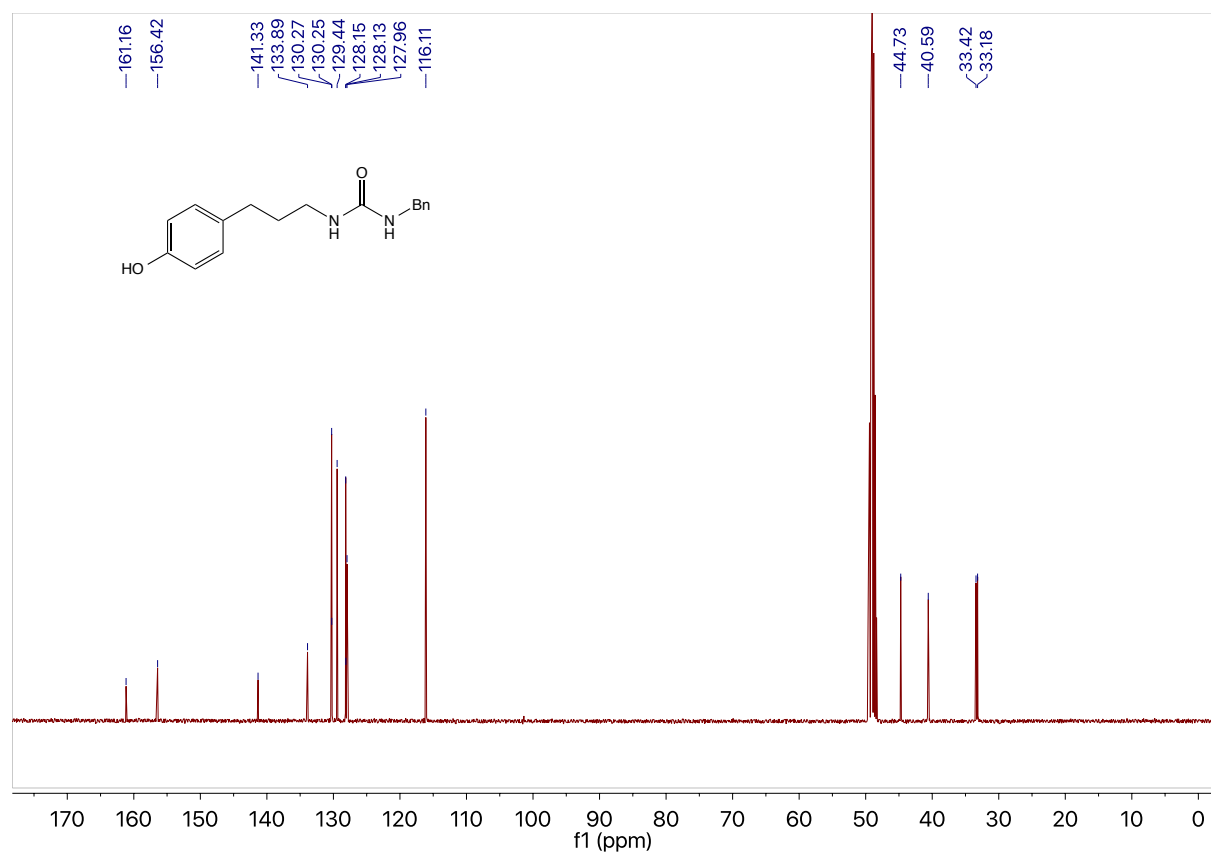



### 3-Cyclopropyl-1-[3-(4-hydroxyphenyl)propyl]urea 1b

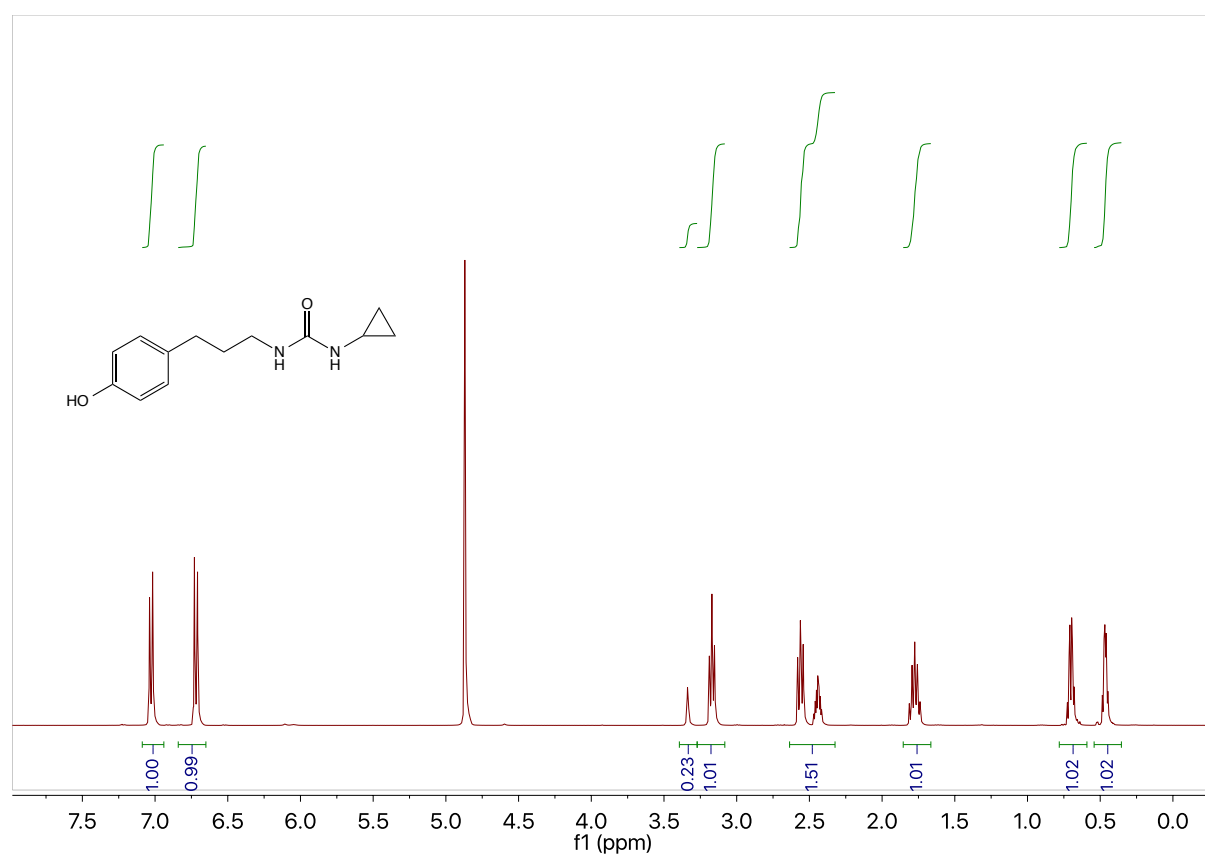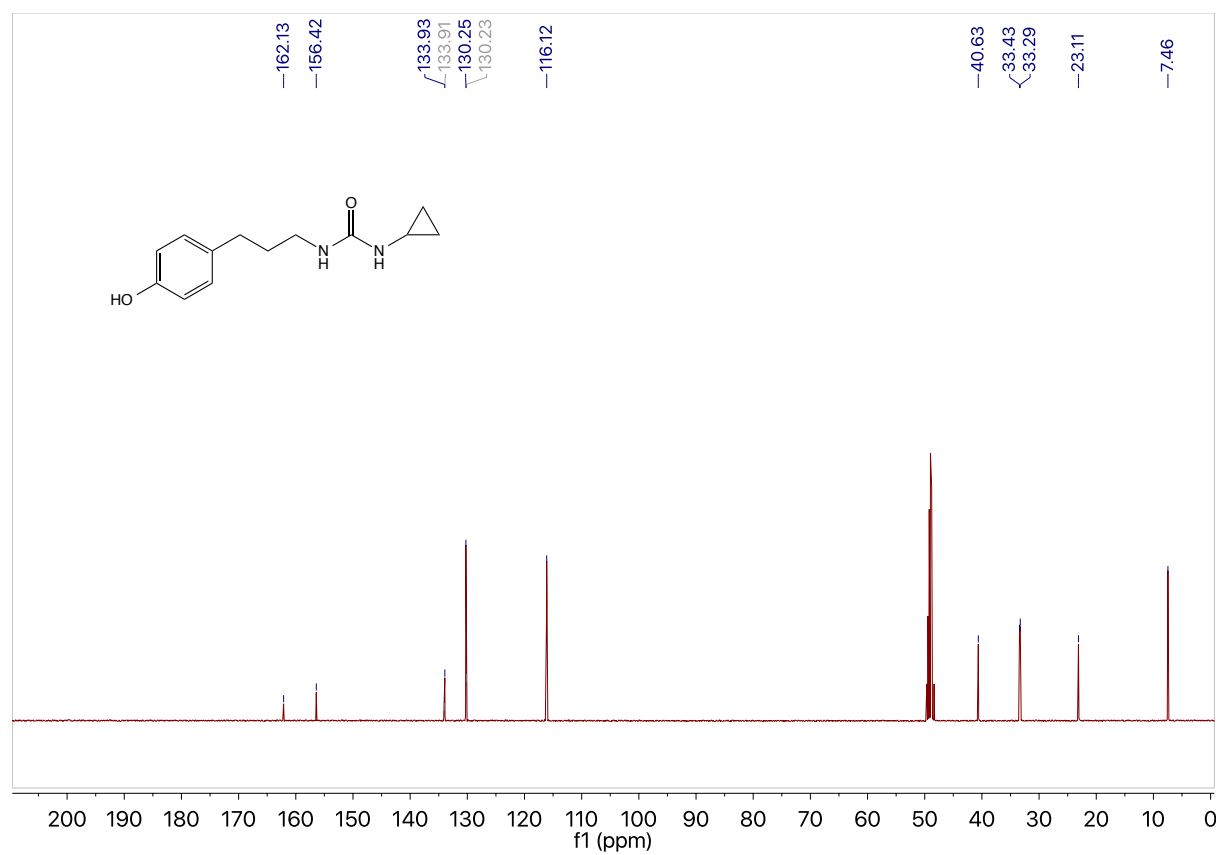

# 1-[3-(4-Hydroxyphenyl)propyl]-3-isopropylurea 1c

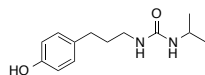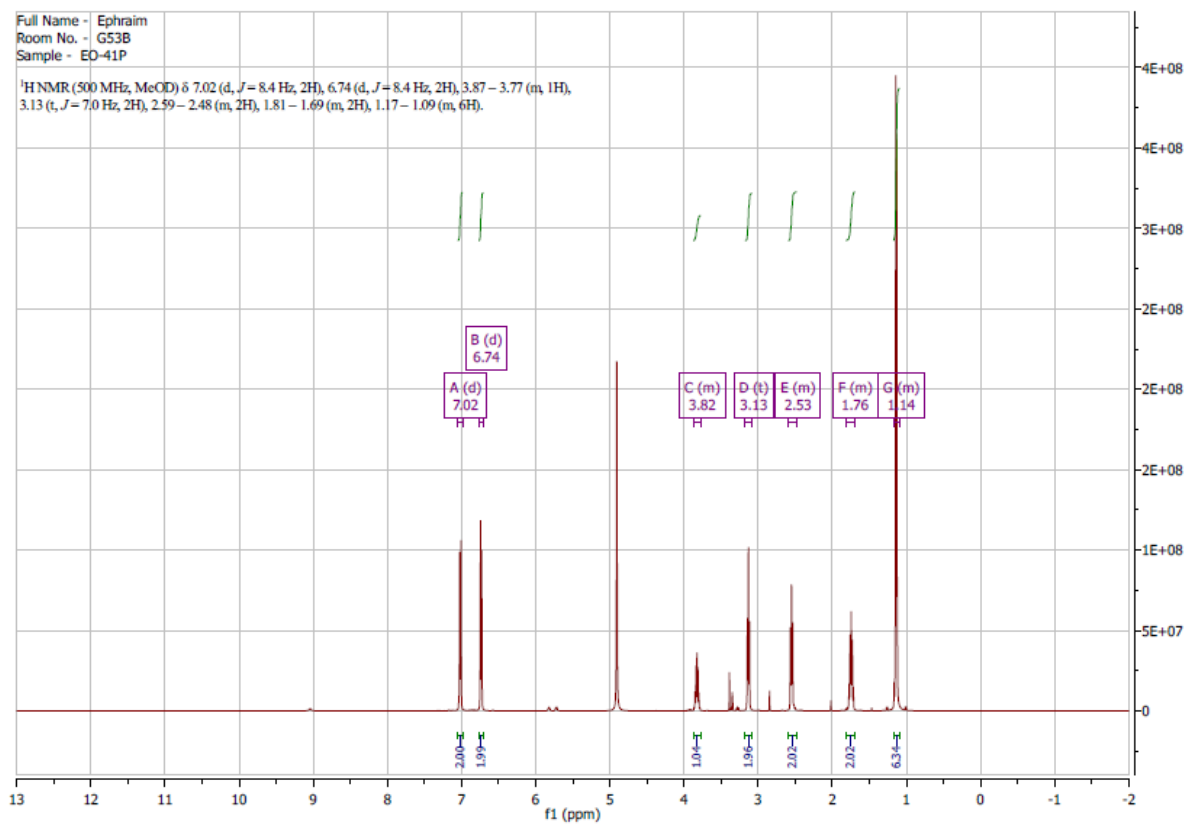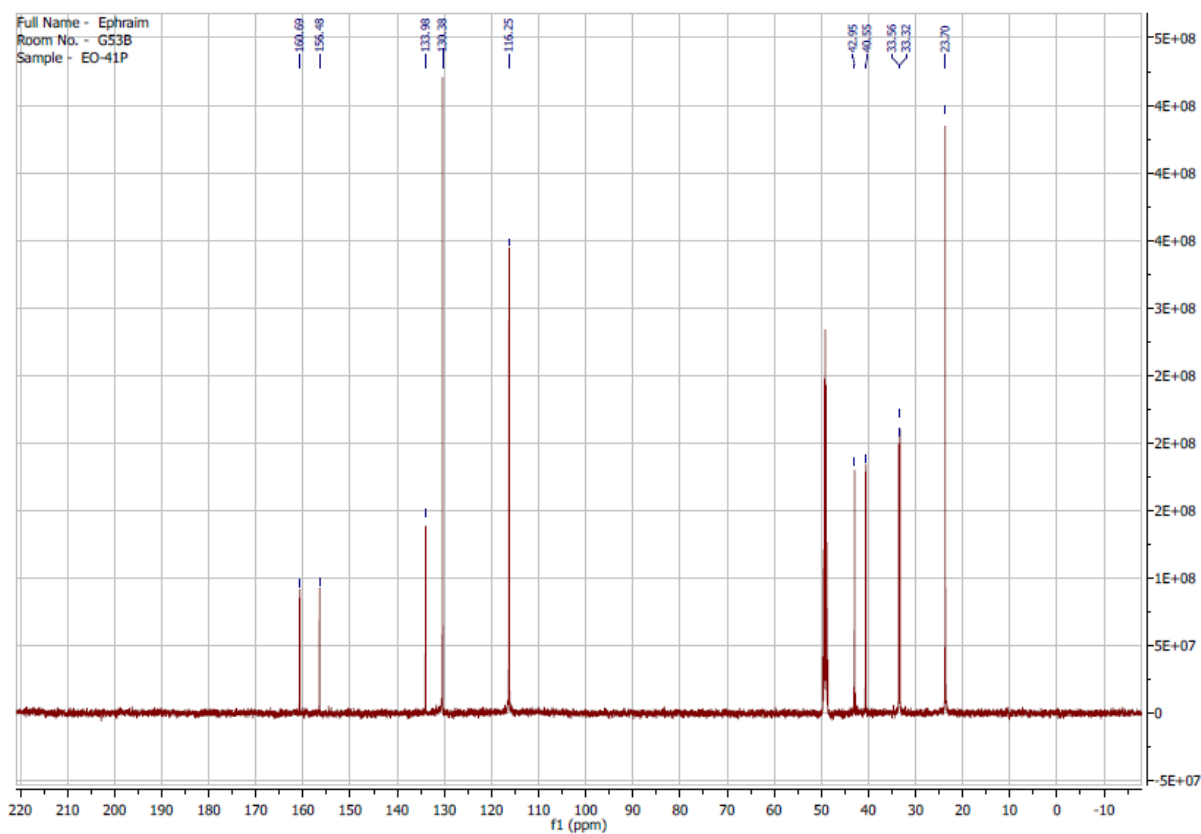

# 1-[3-(4-Hydroxyphenyl)propyl]-3-(2-methoxyethyl)urea 1d

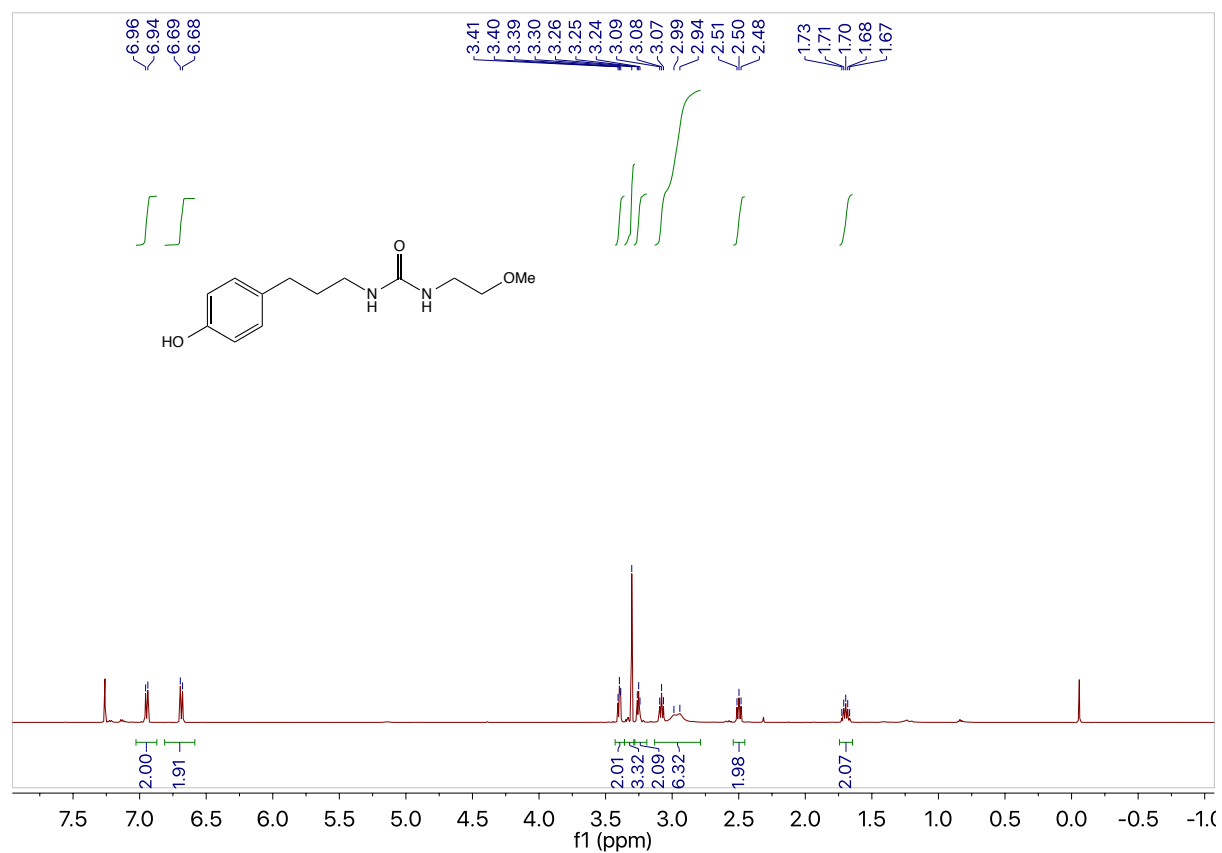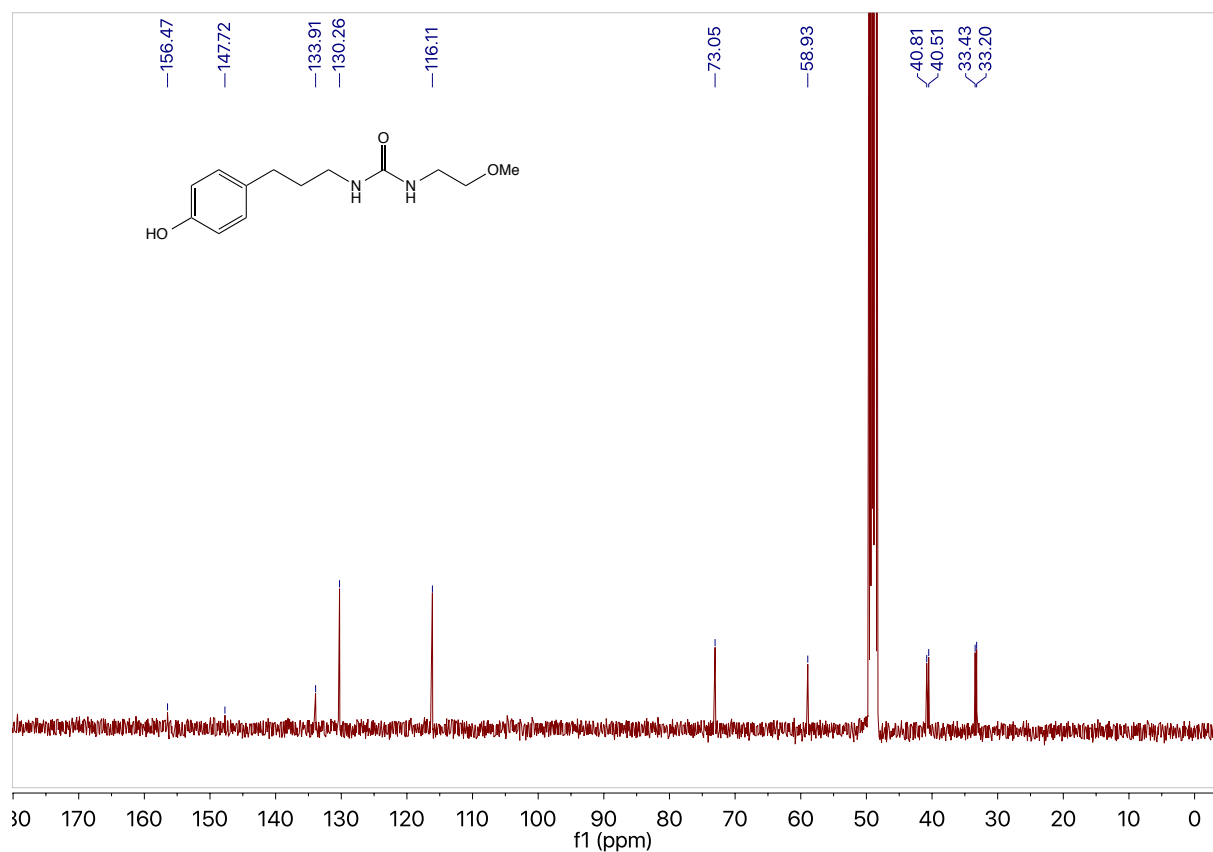

Ethyl 2-({[3-(4-hydroxyphenyl)propyl]carbamoyl}amino)acetate 1e

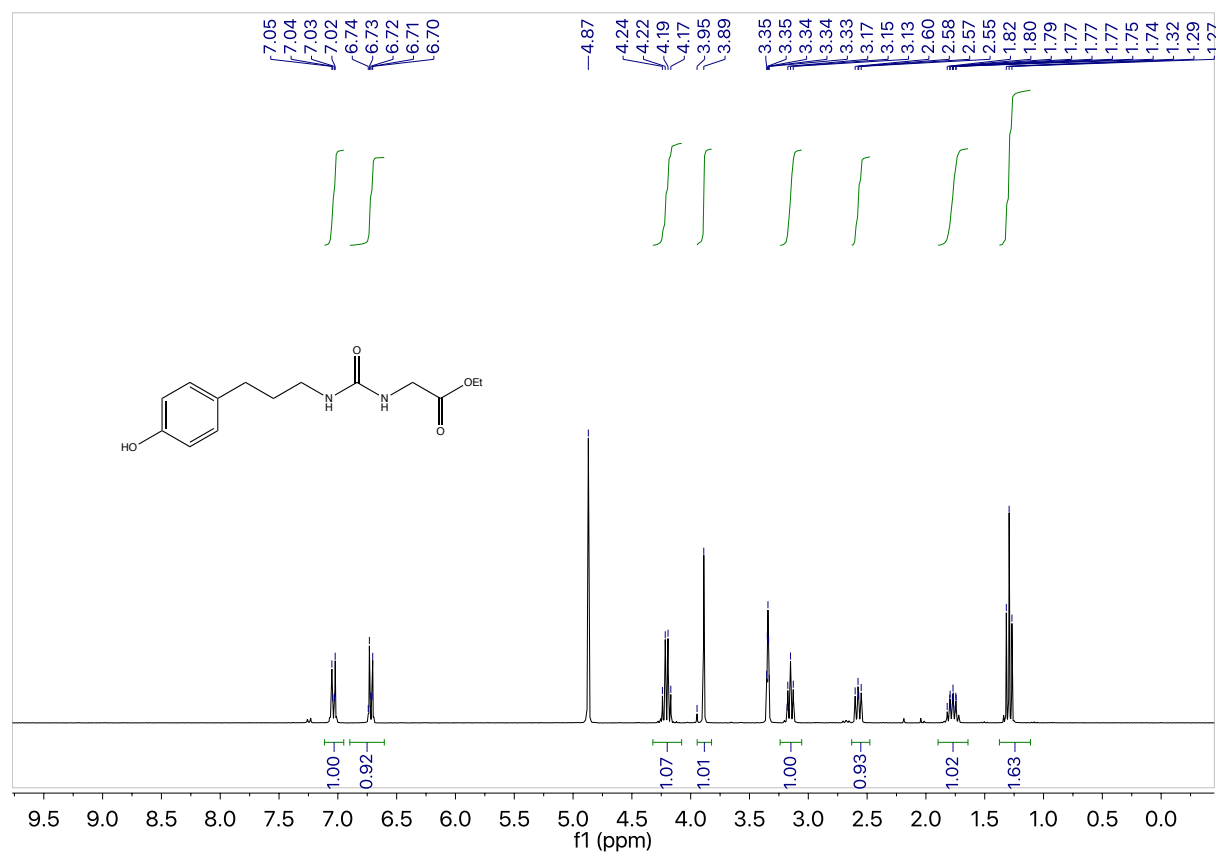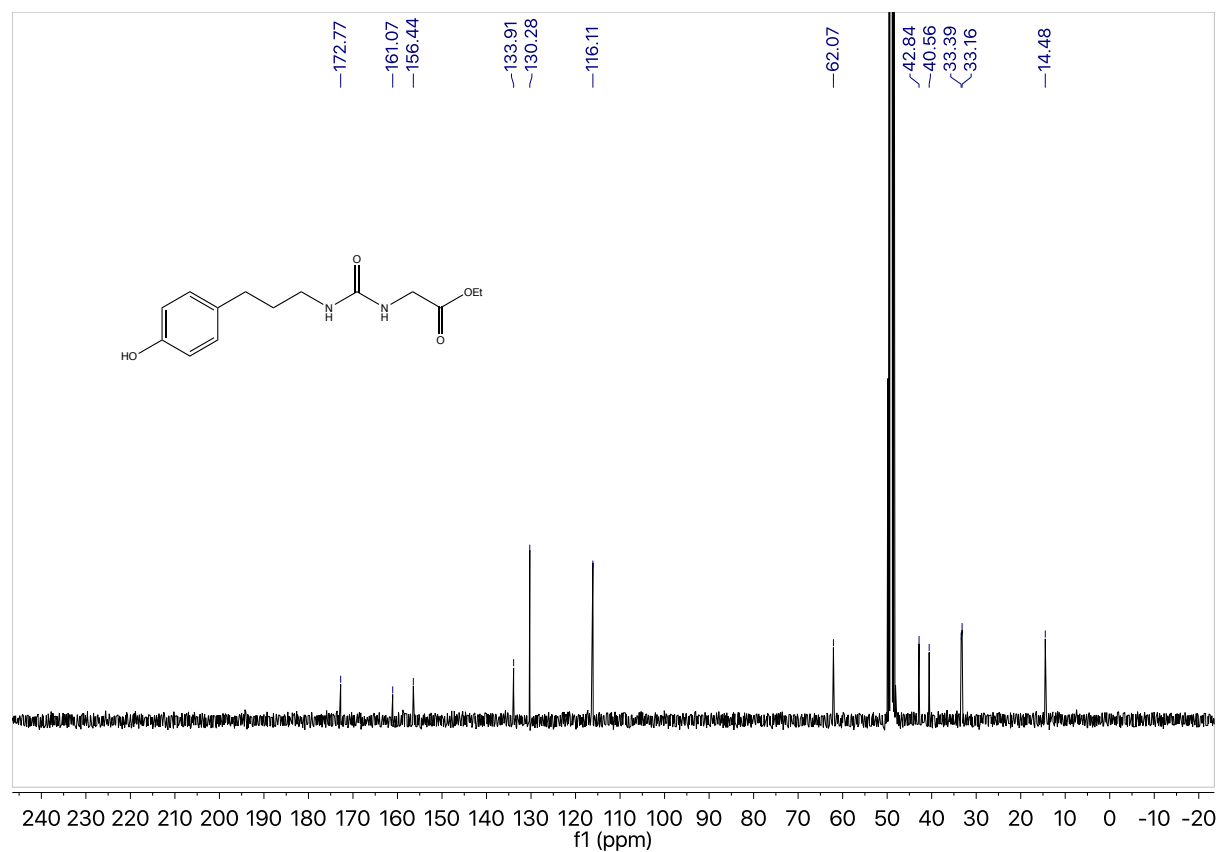

### 3-[3-(4-Hydroxyphenyl)propyl]-1-(4-methylbenzenesulfonyl)urea 1f

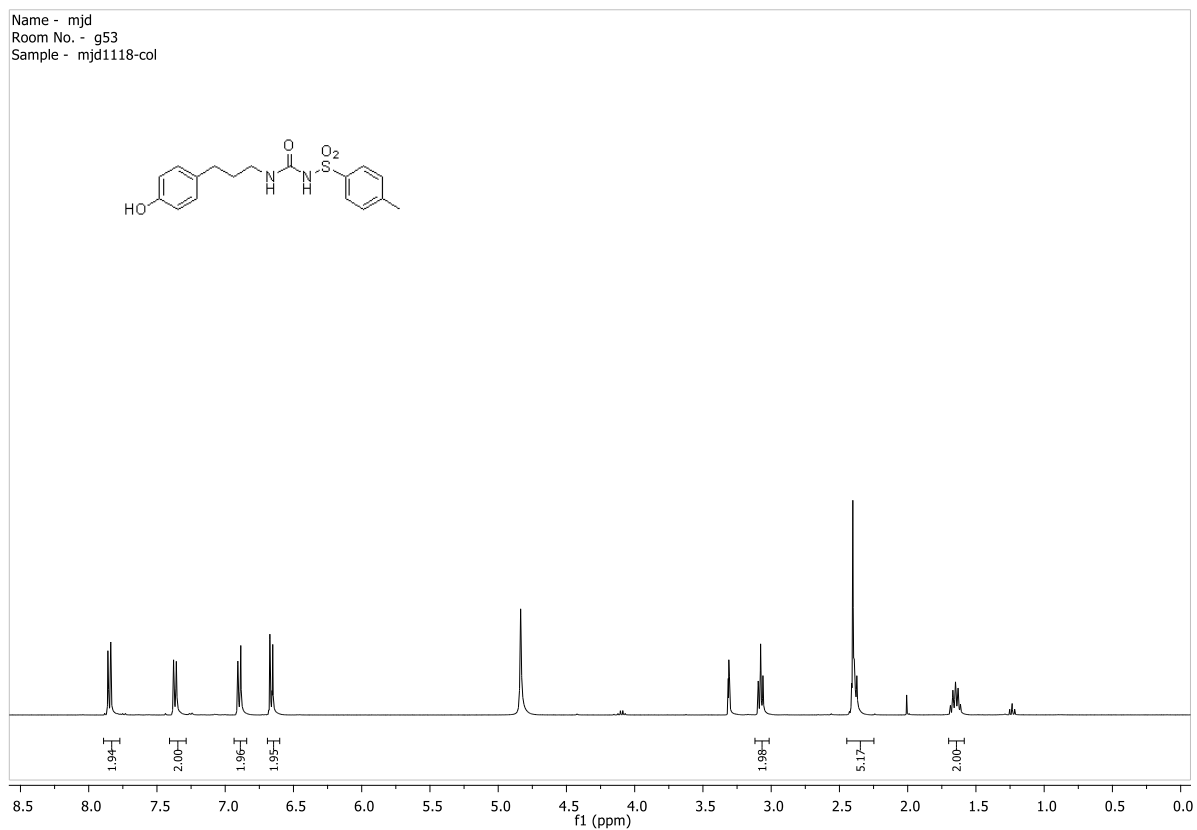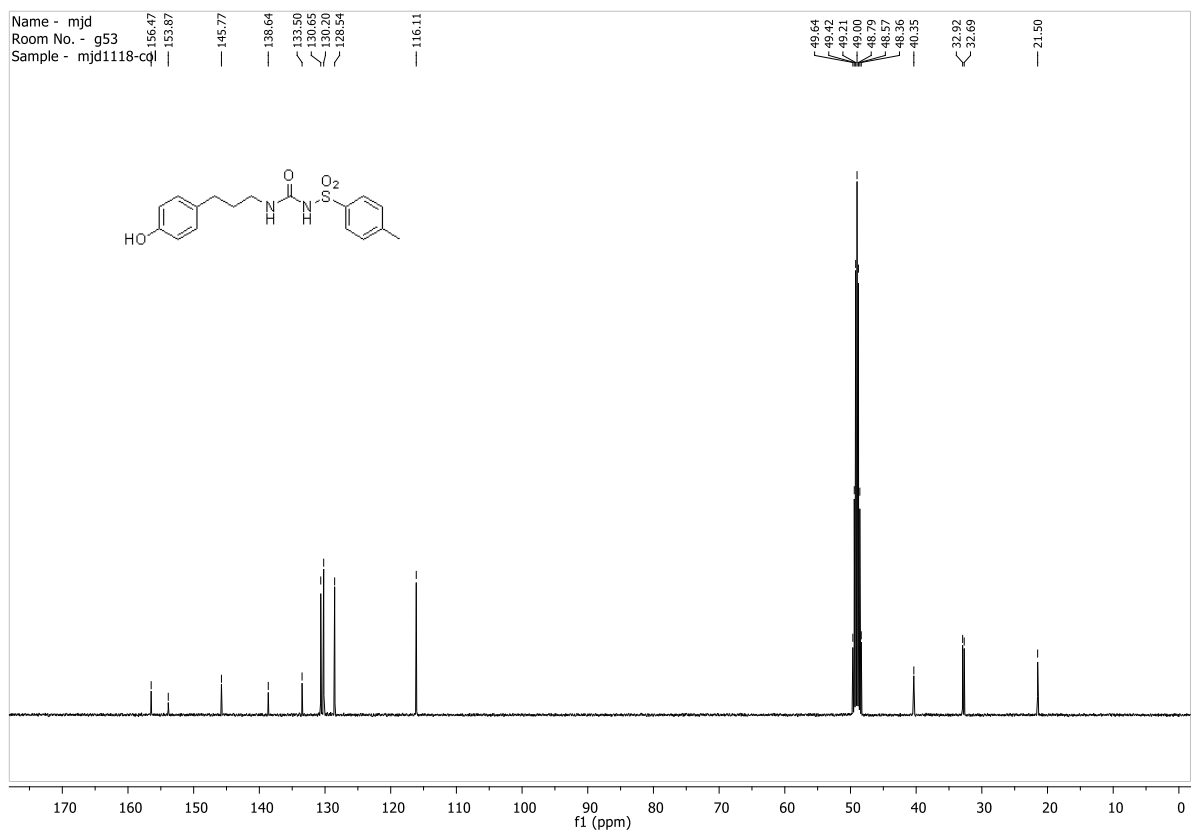

# [3-(4-Hydroxyphenyl)propyl]urea 1g

MJD1112  
Name - mjd  
Room No. - g53  
Sample - MJD1112

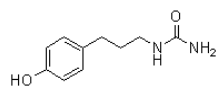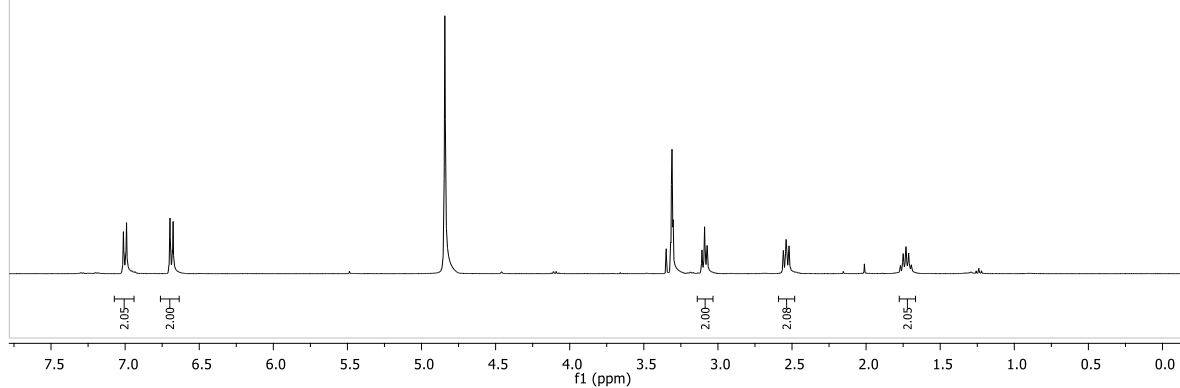

MJD1112  
Name - mjd  
Room No. - g53  
Sample - MJD1112

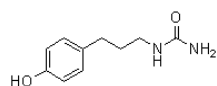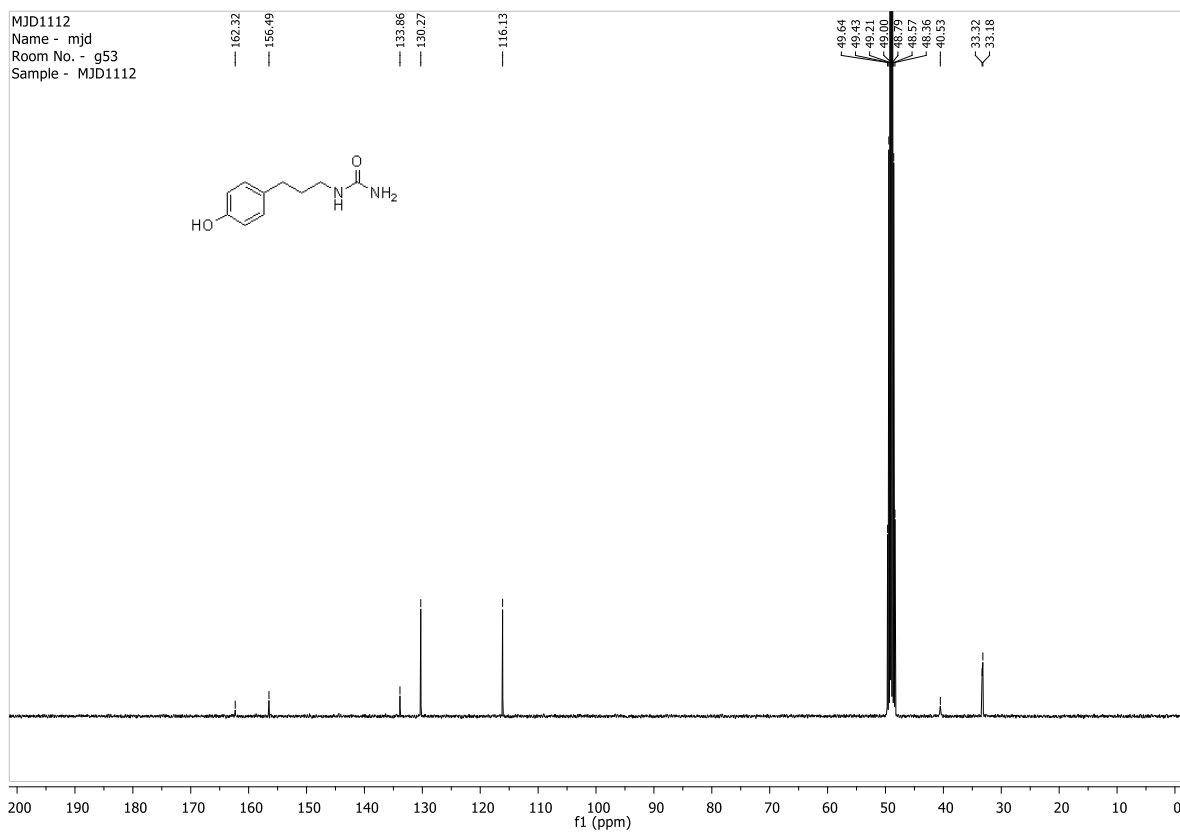

# 1-(4-Chlorophenyl)-3-[3-(4-hydroxyphenyl)propyl]urea 1h

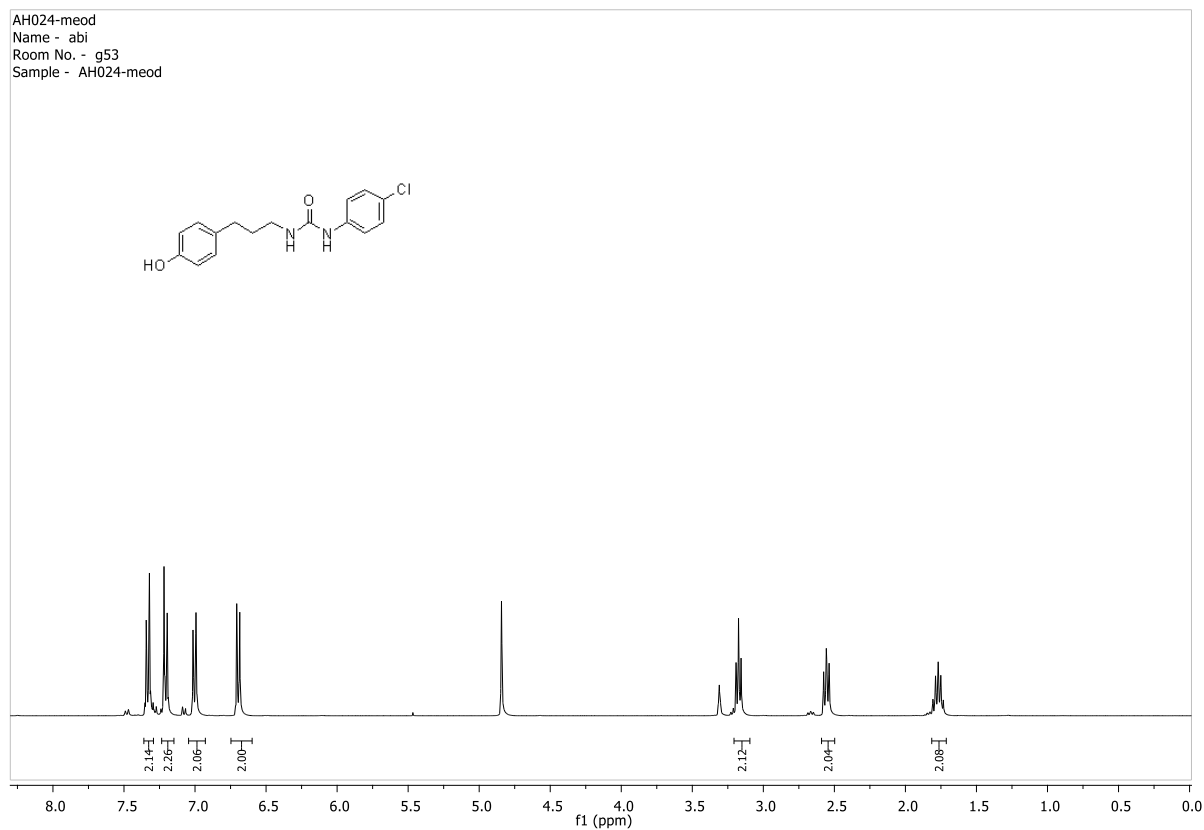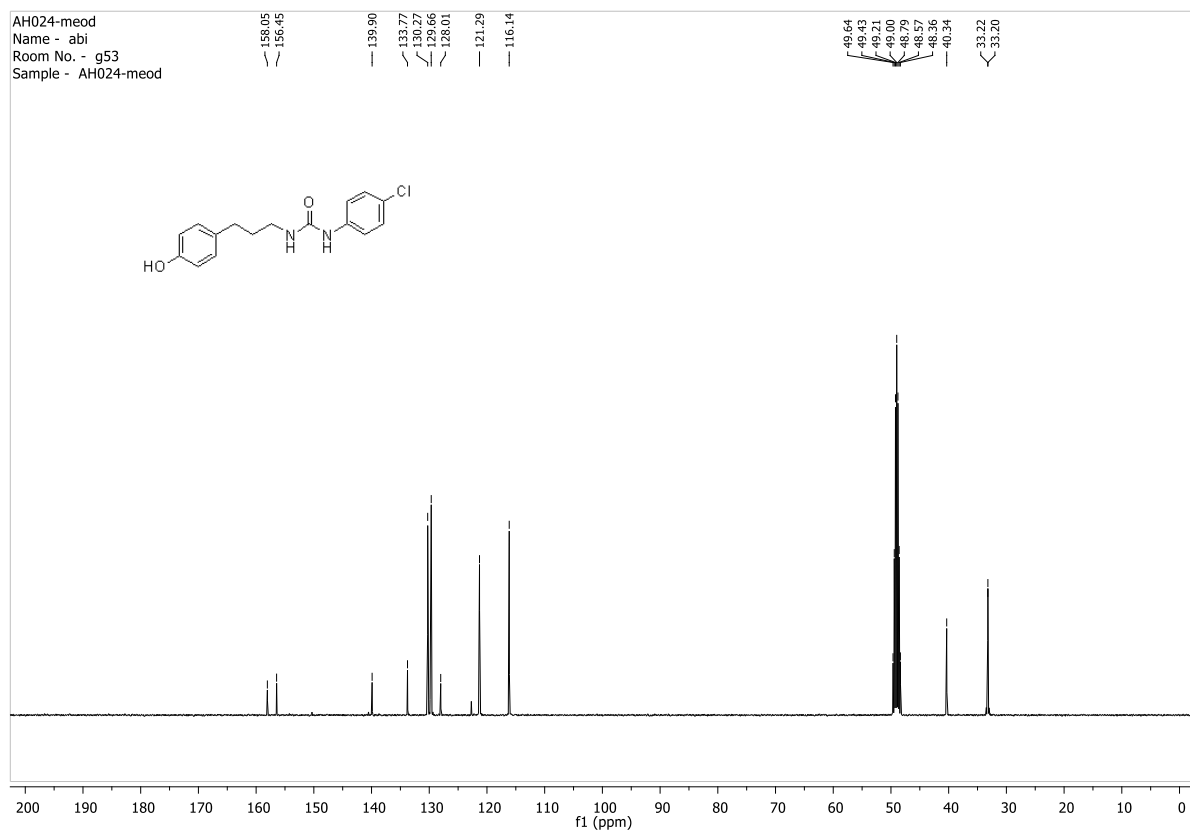

# 1-(3-(4-Hydroxyphenyl)propyl)-3-(4-methoxyphenyl)urea 1i

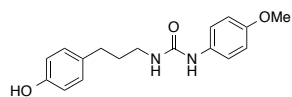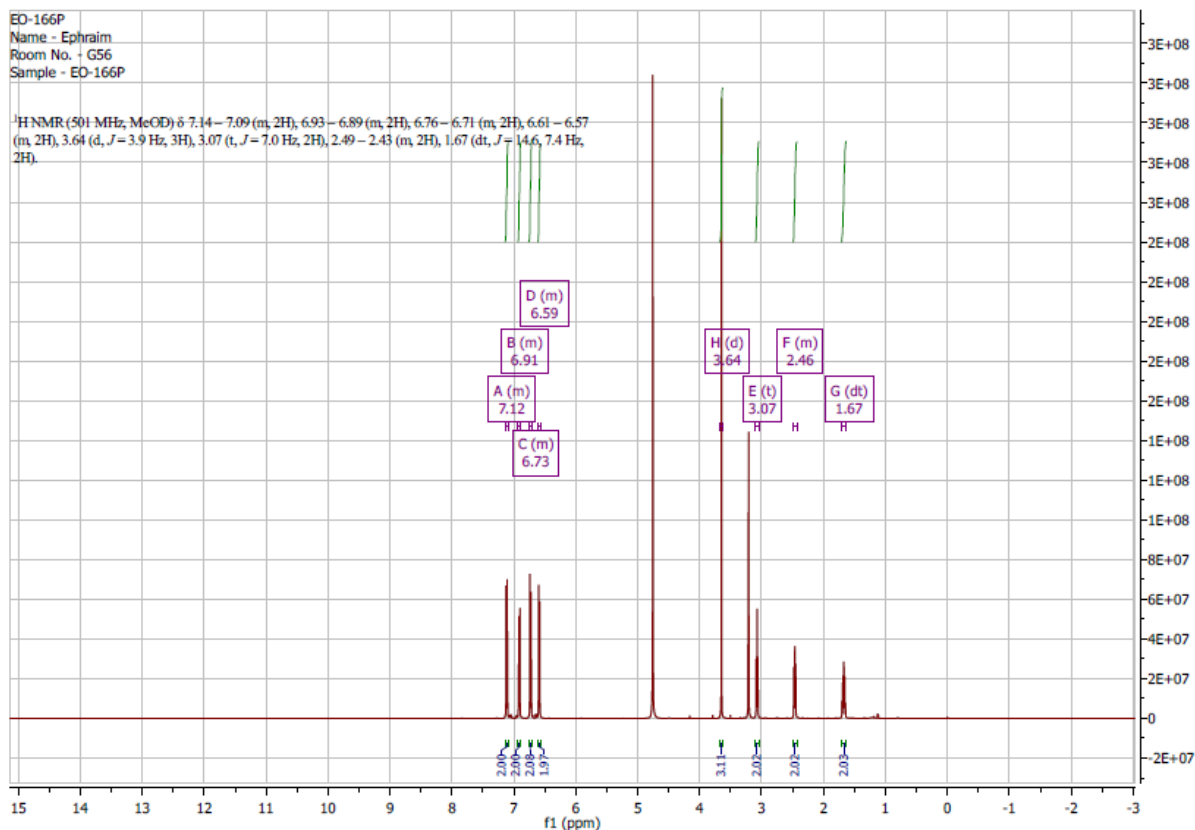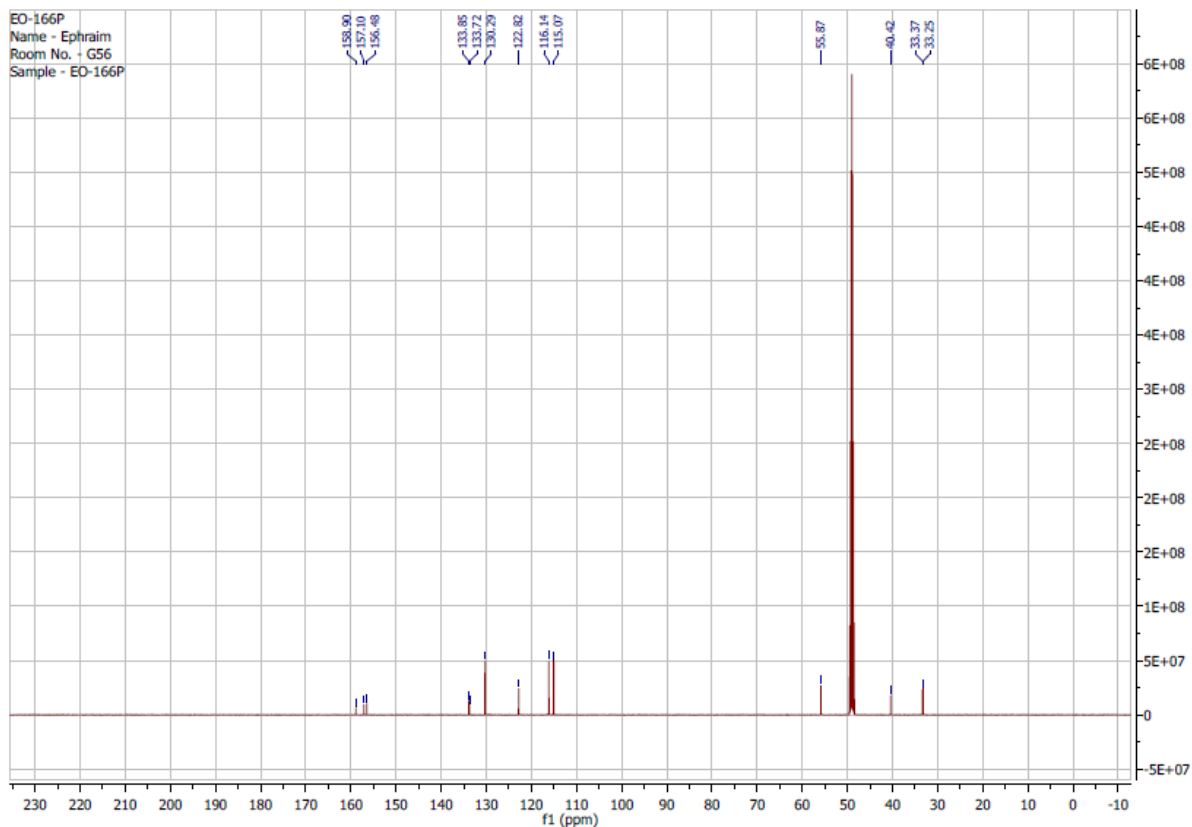



### 3-[3-(4-Hydroxyphenyl)propyl]-1-[4-(trifluoromethyl)phenyl]urea 1j

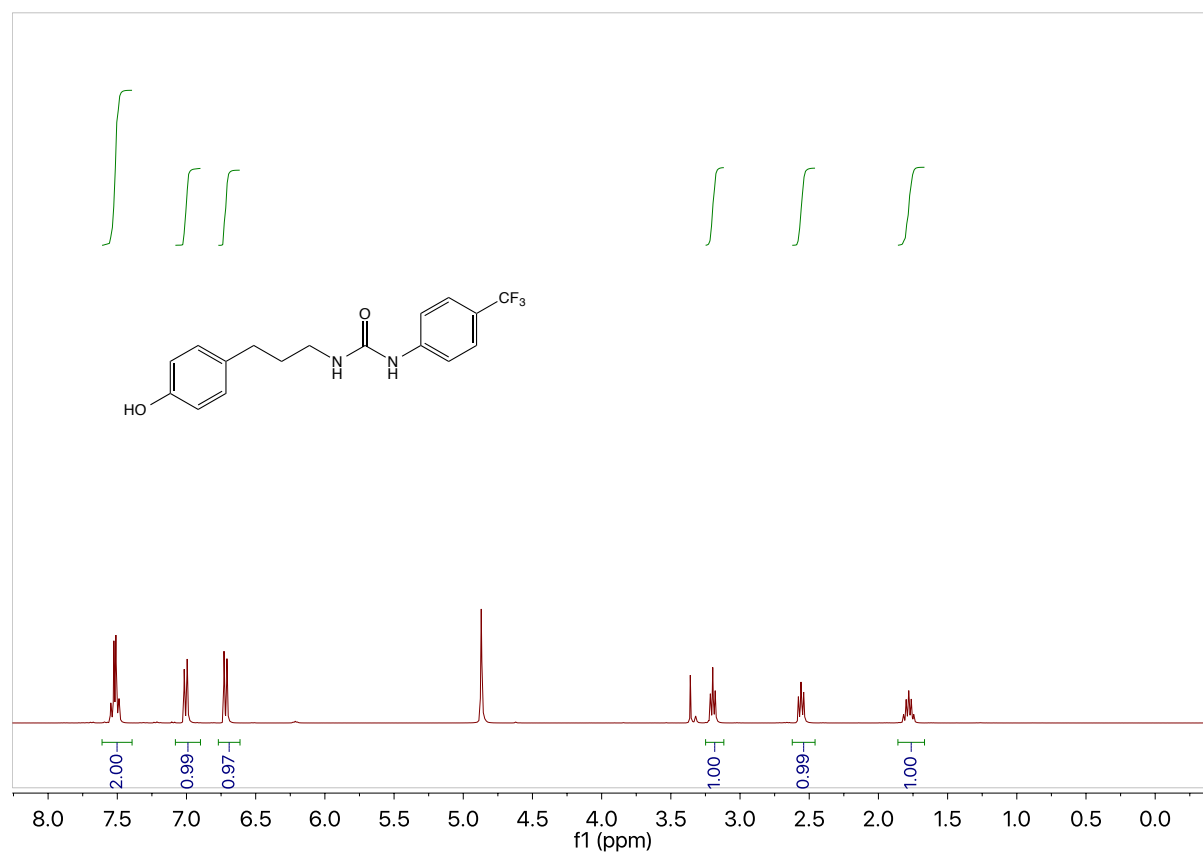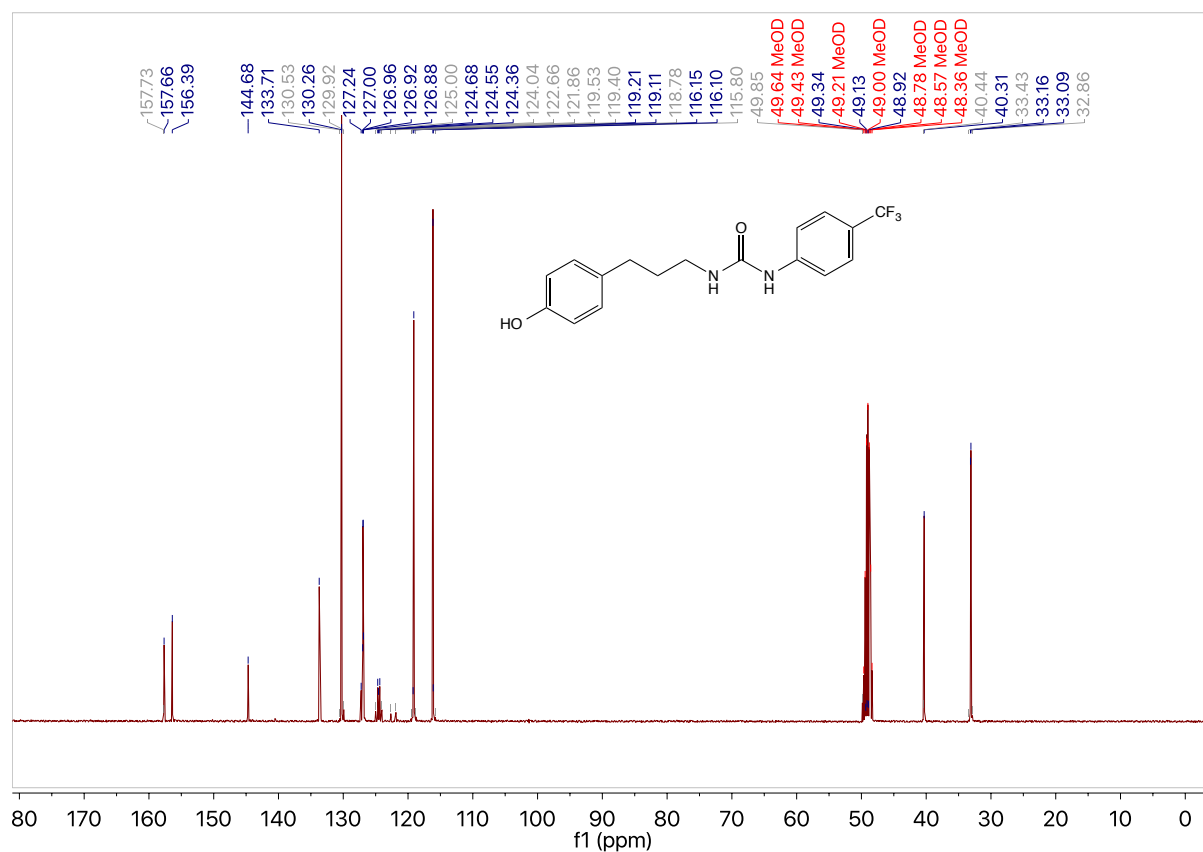



**(2E/Z)-3-(3-Methoxy-4-[[tris(propan-2-yl)silyl]oxy]phenyl)prop-2-enitriles S4**

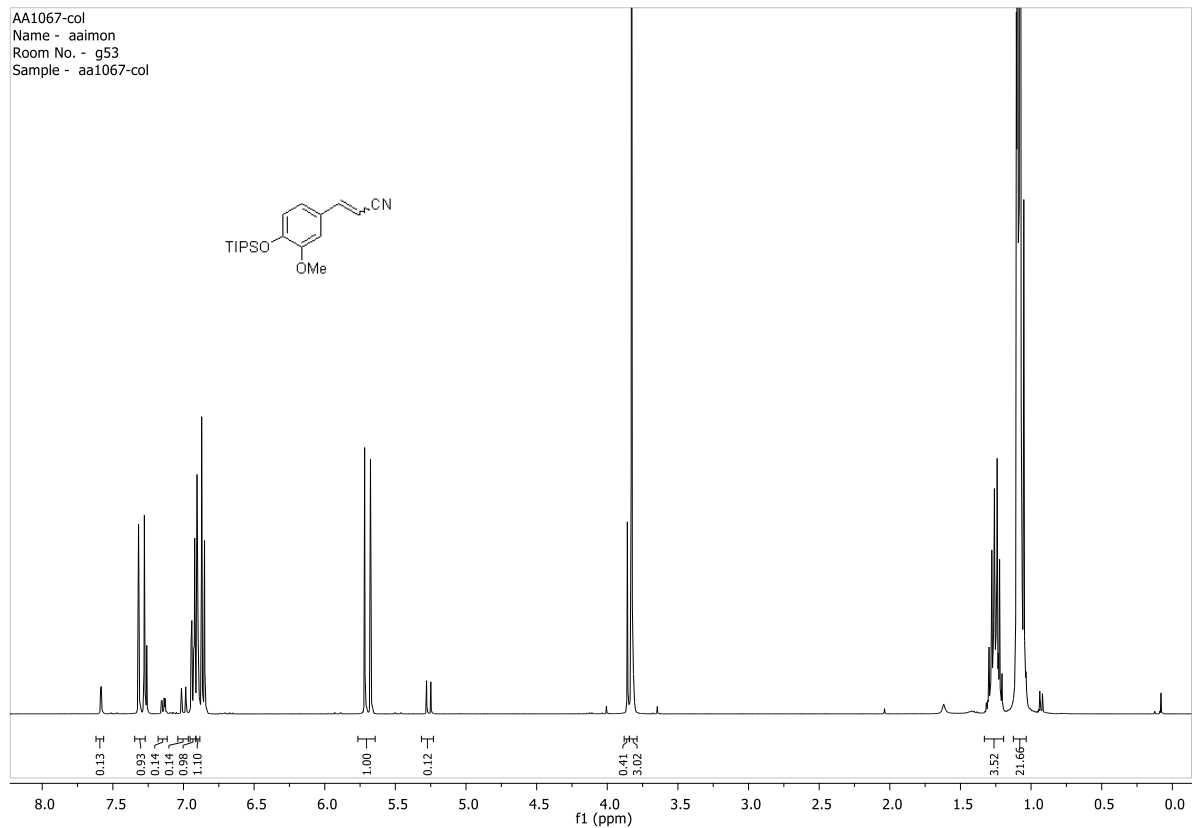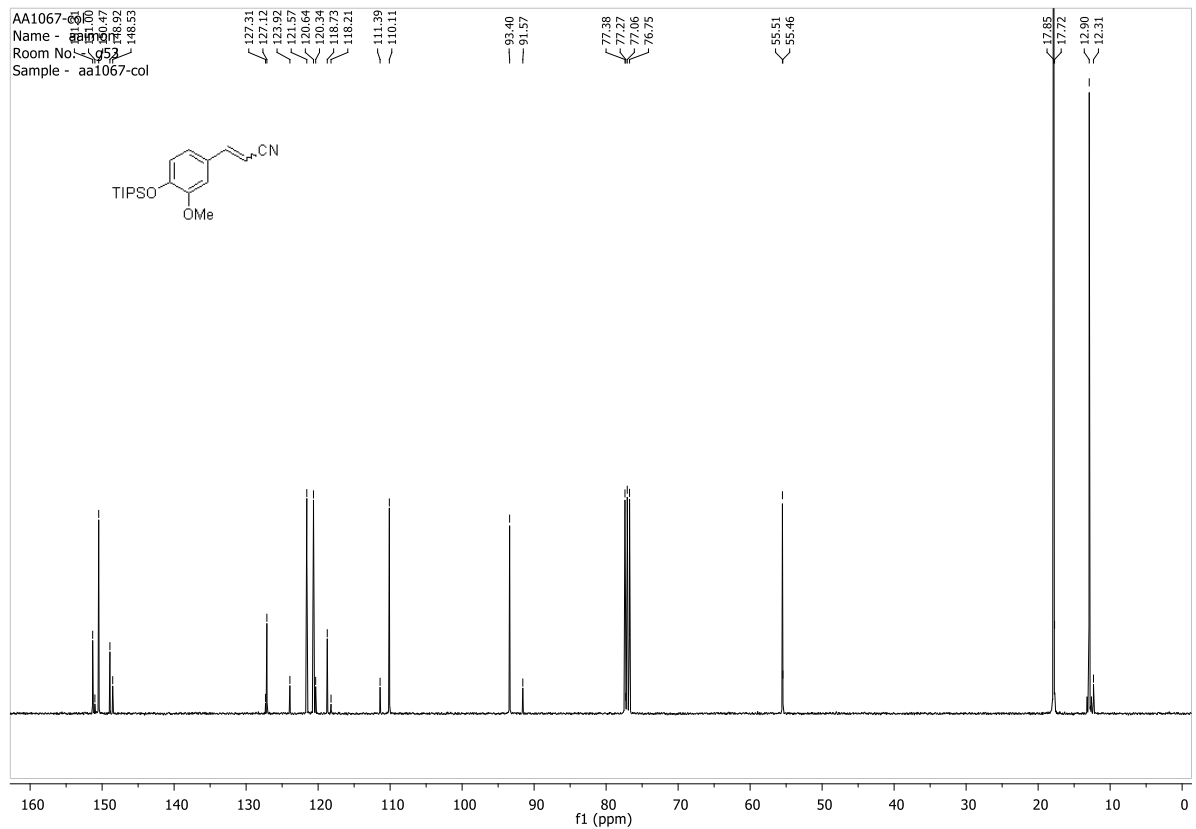

# 1-Benzyl-3-[3-(3-methoxy-4-[[tris(propan-2-yl)silyl]oxy]phenyl)propyl]urea S6

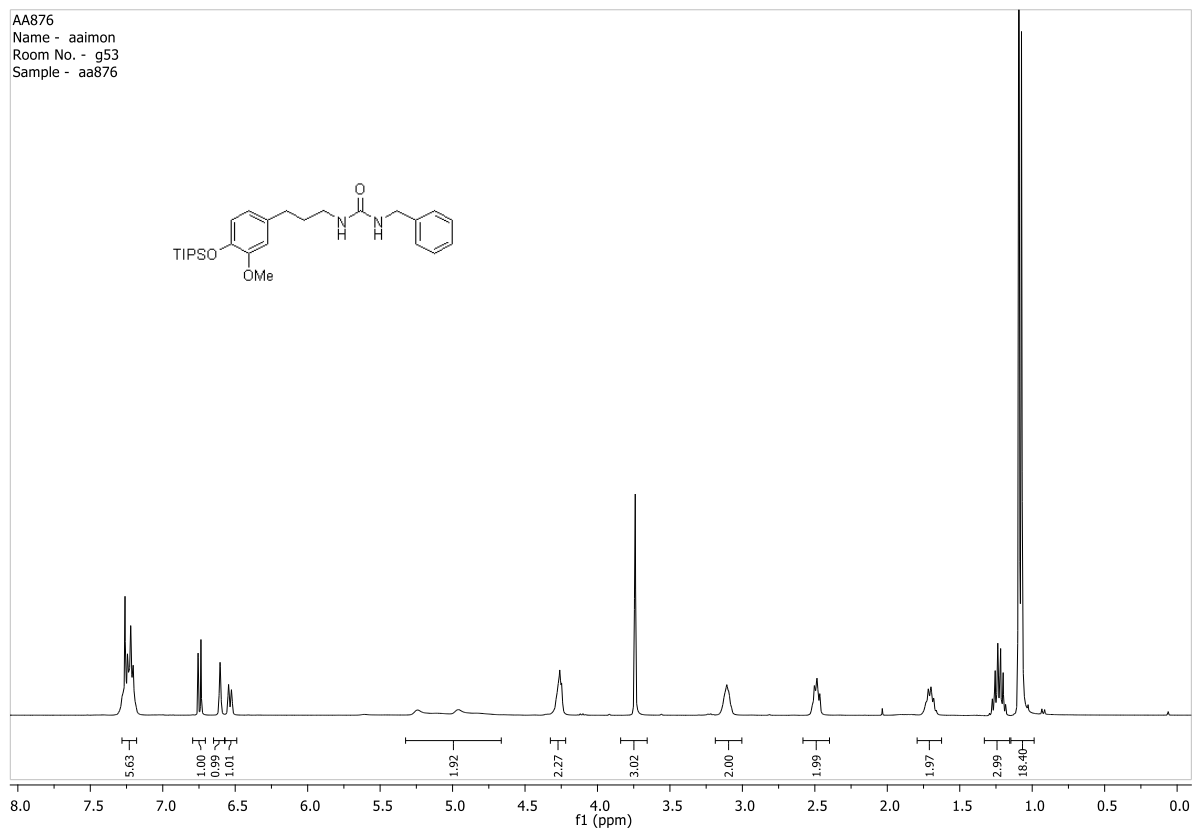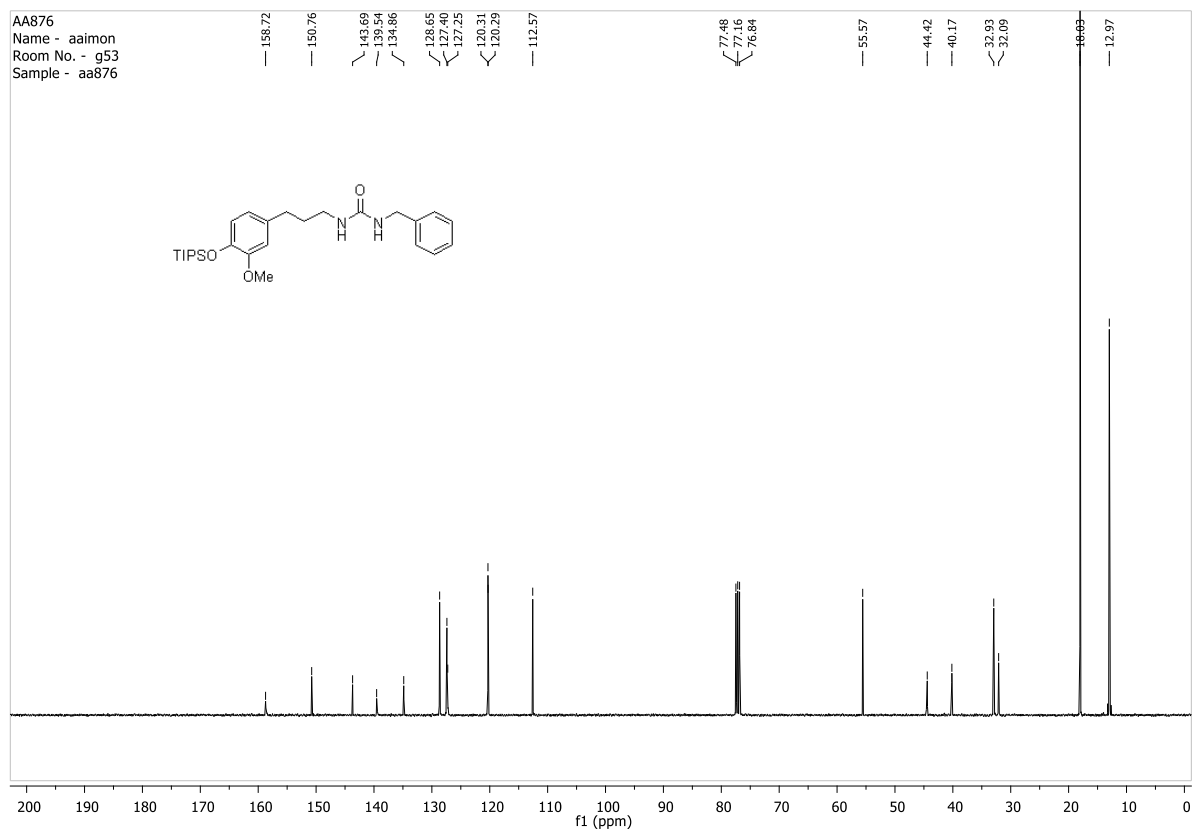

# 1-Benzyl-3-[3-(4-hydroxy-3-methoxyphenyl)propyl]urea 1k

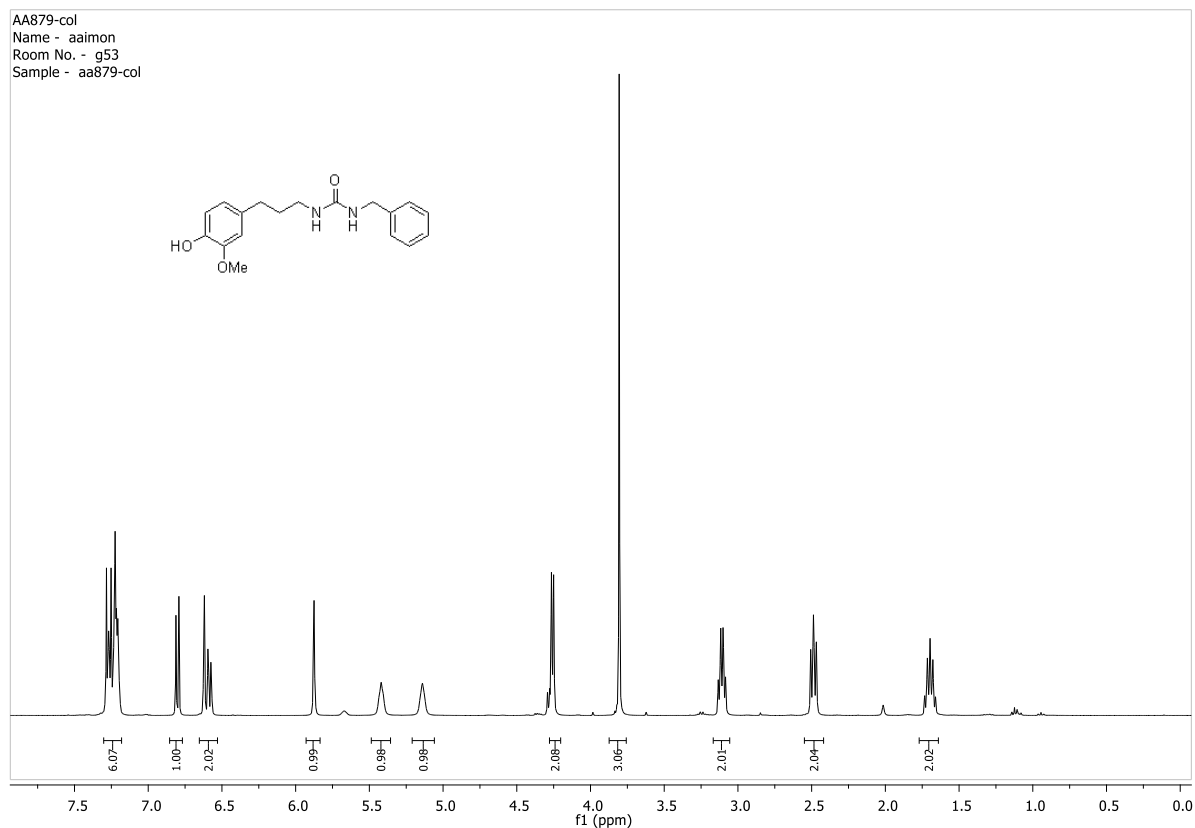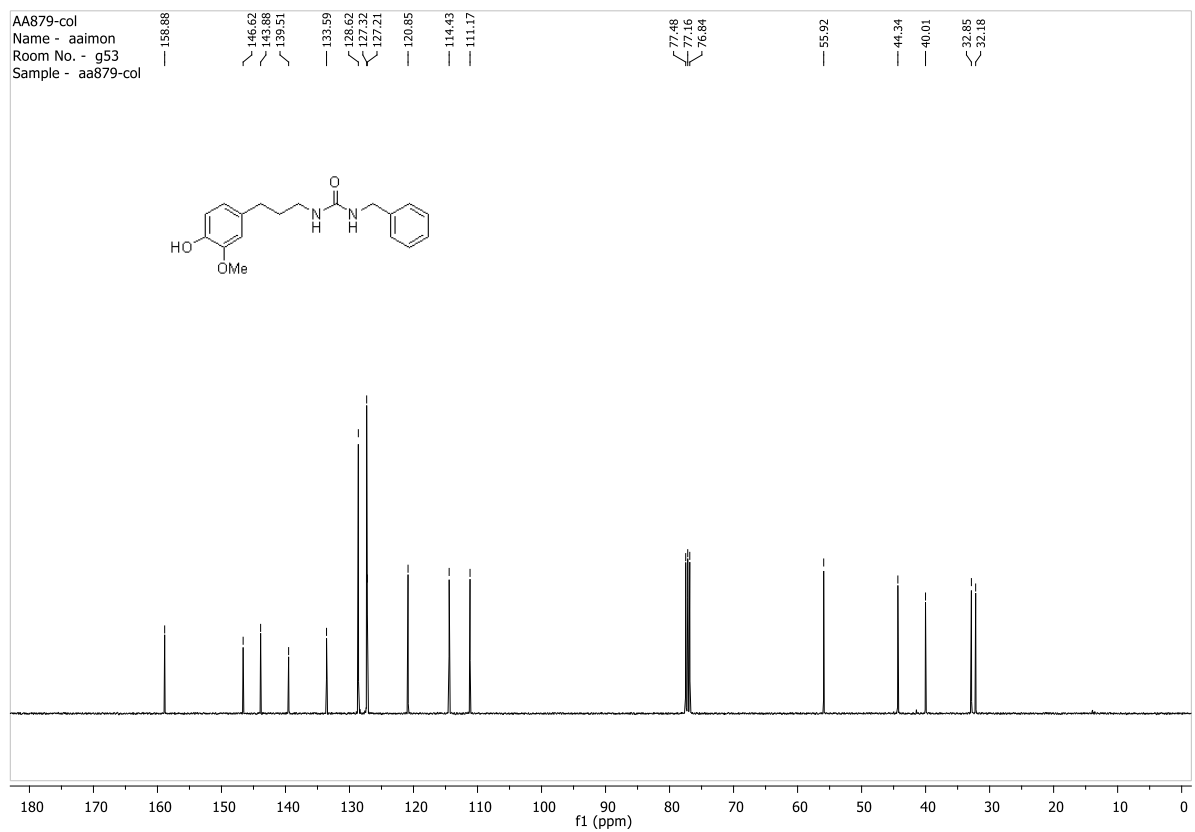

**Ethyl 2-({[3-(3-methoxy-4-{[tris(propan-2-yl)silyl]oxy}phenyl)propyl]carbamoyl}amino)-acetate S7**

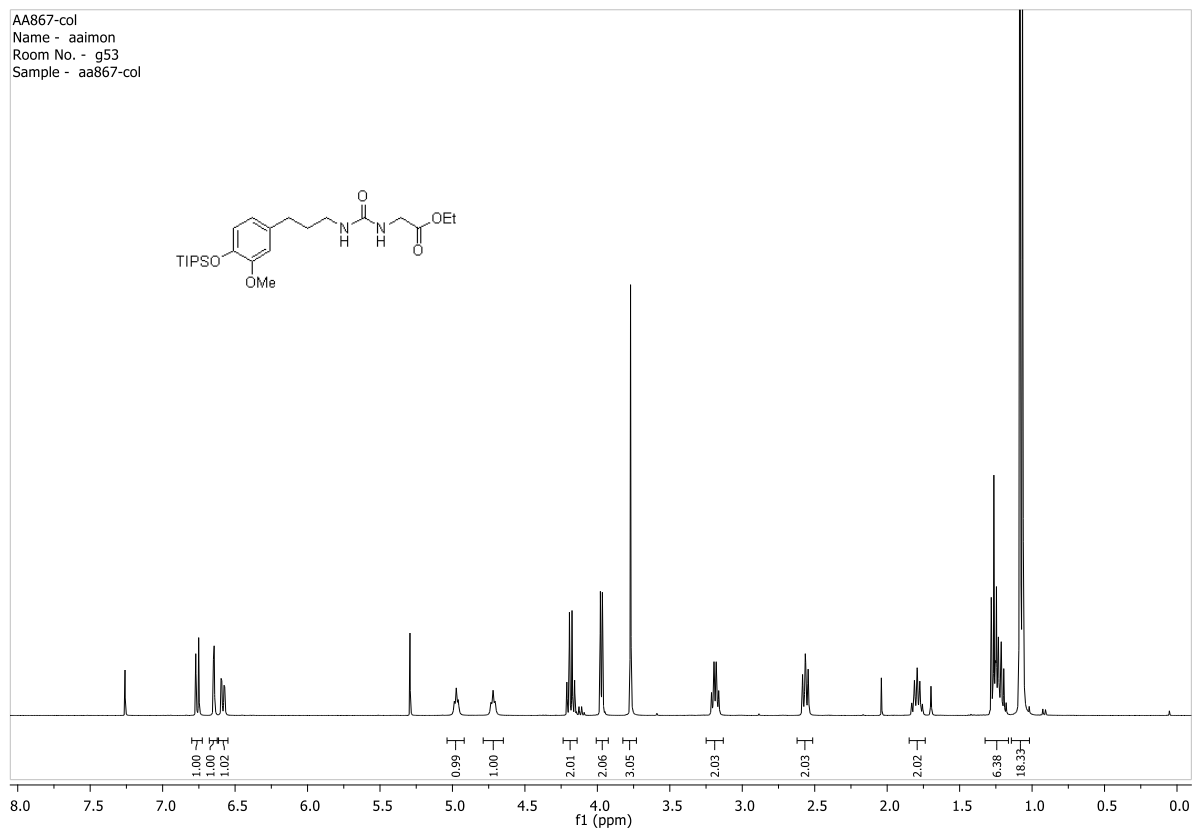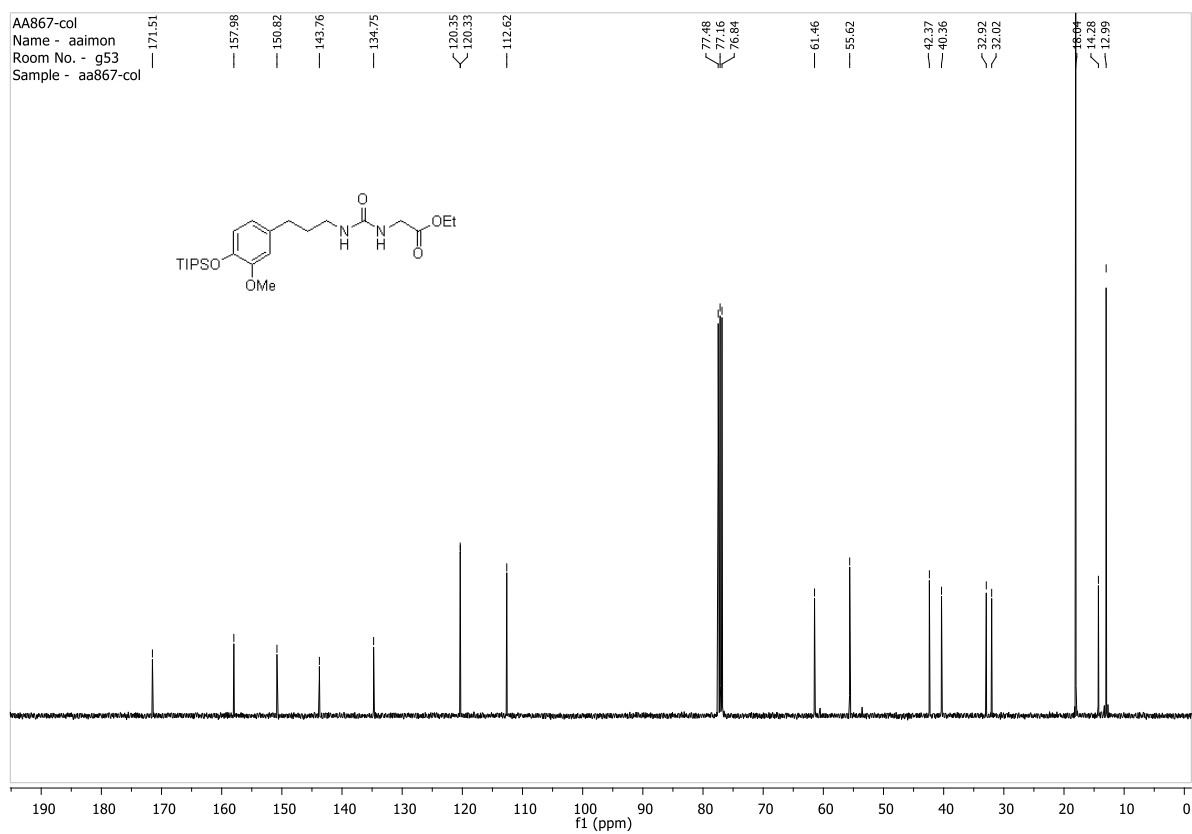

# Ethyl 2-({[3-(4-hydroxy-3-methoxyphenyl)propyl]carbamoyl}amino)acetate 11

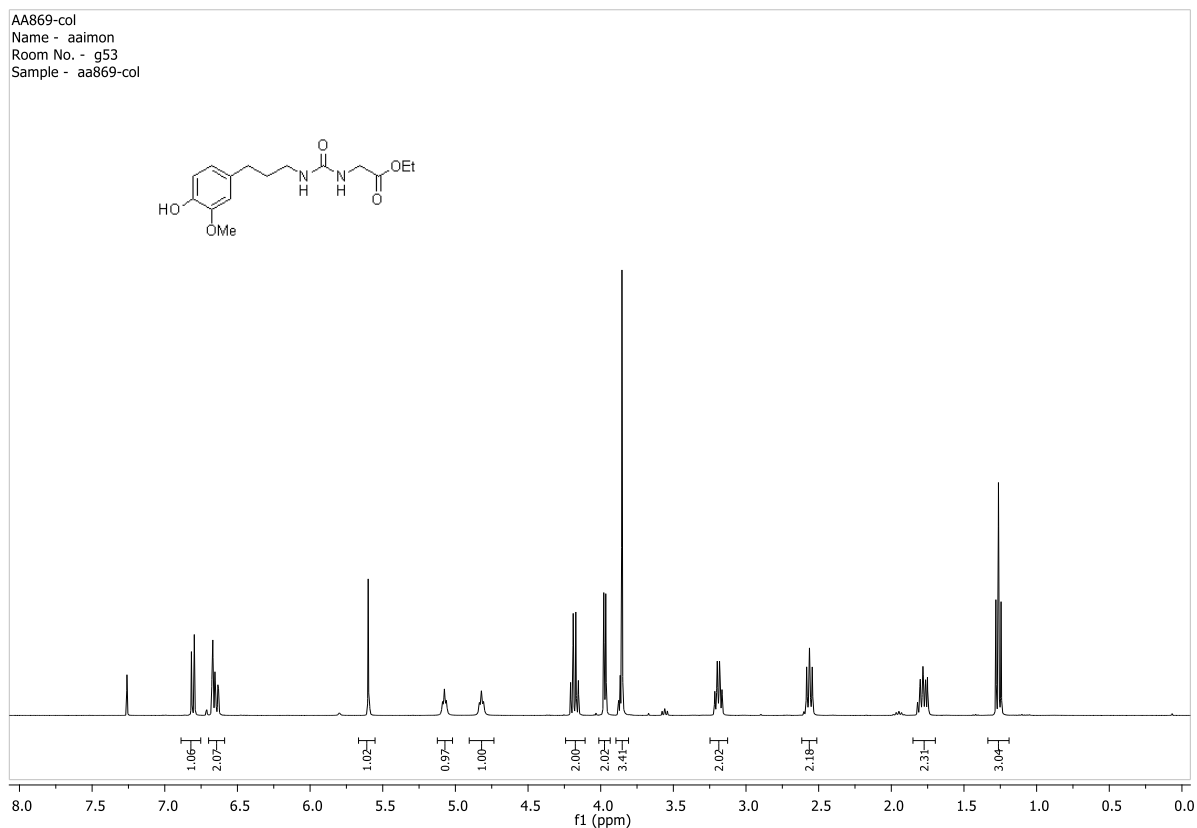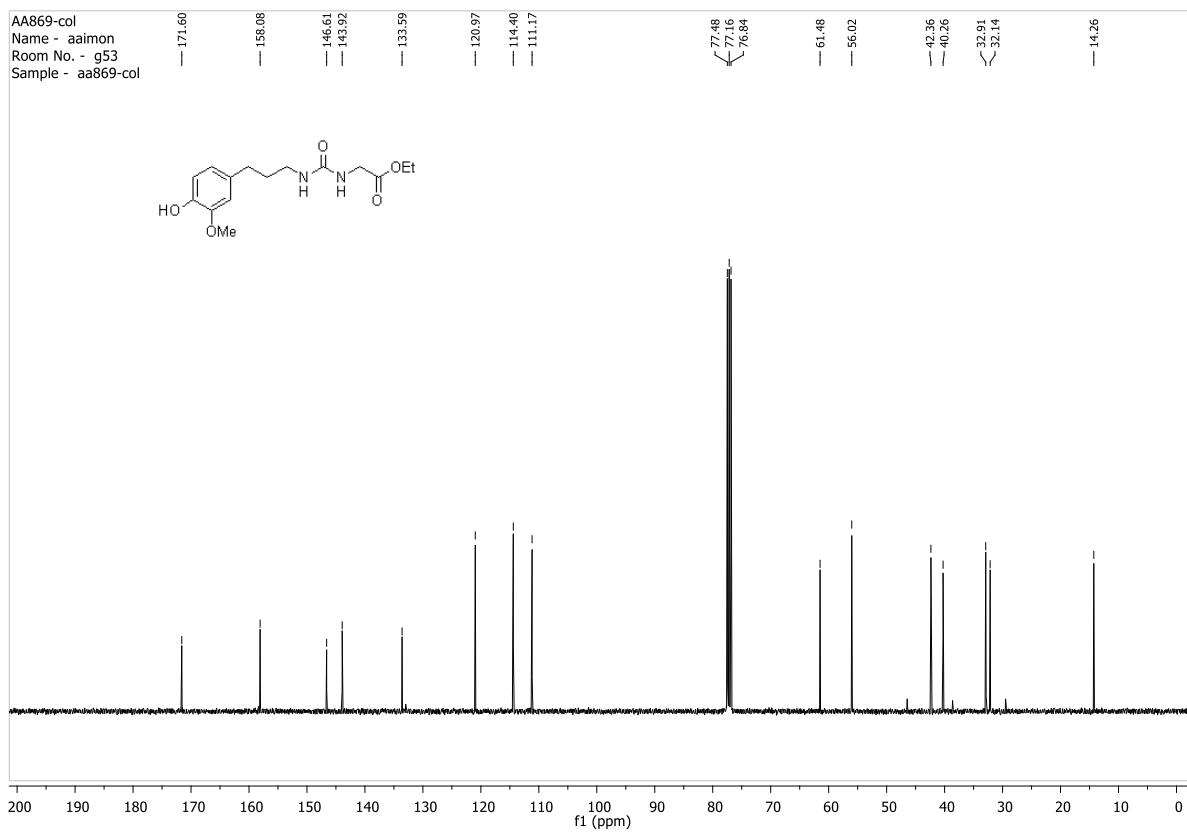

**3-[3-(3-Methoxy-4-{*tris*(propan-2-yl)silyl]oxy}phenyl)propyl]-1-(4-methylbenzenesulfonyl)urea S8**

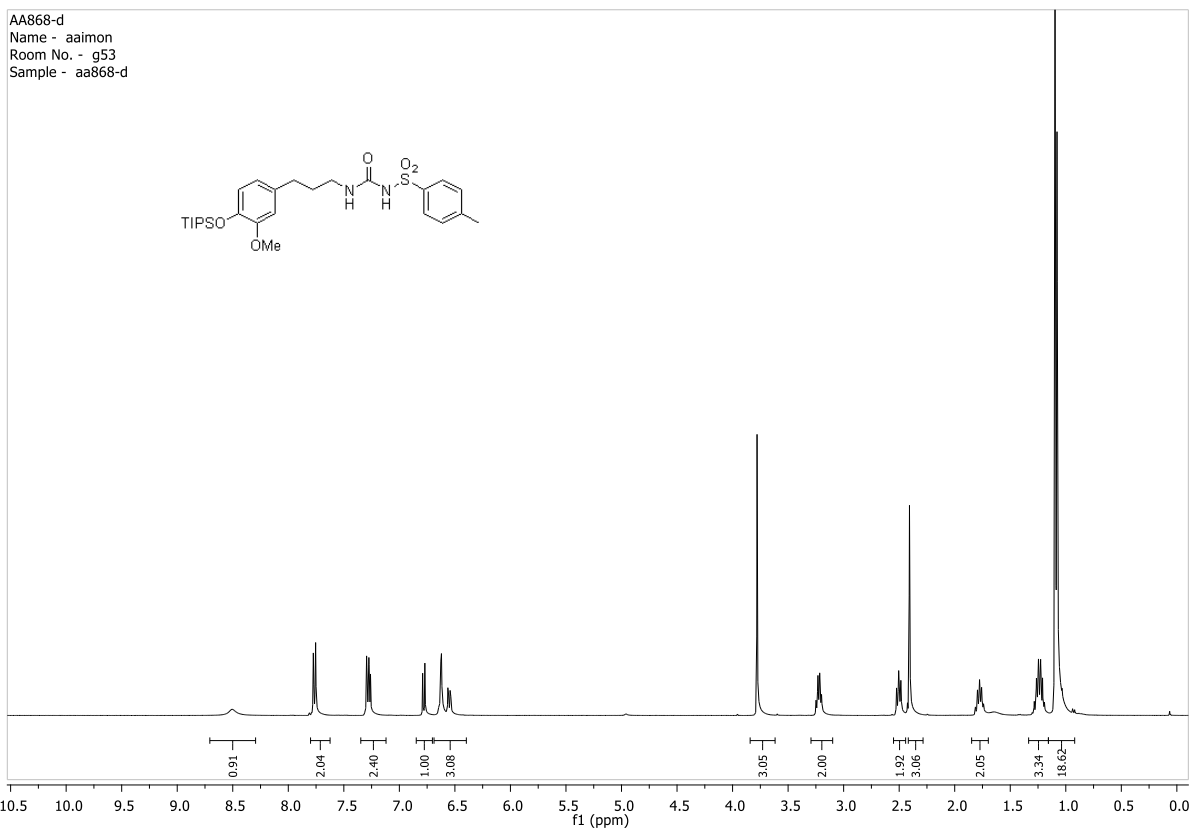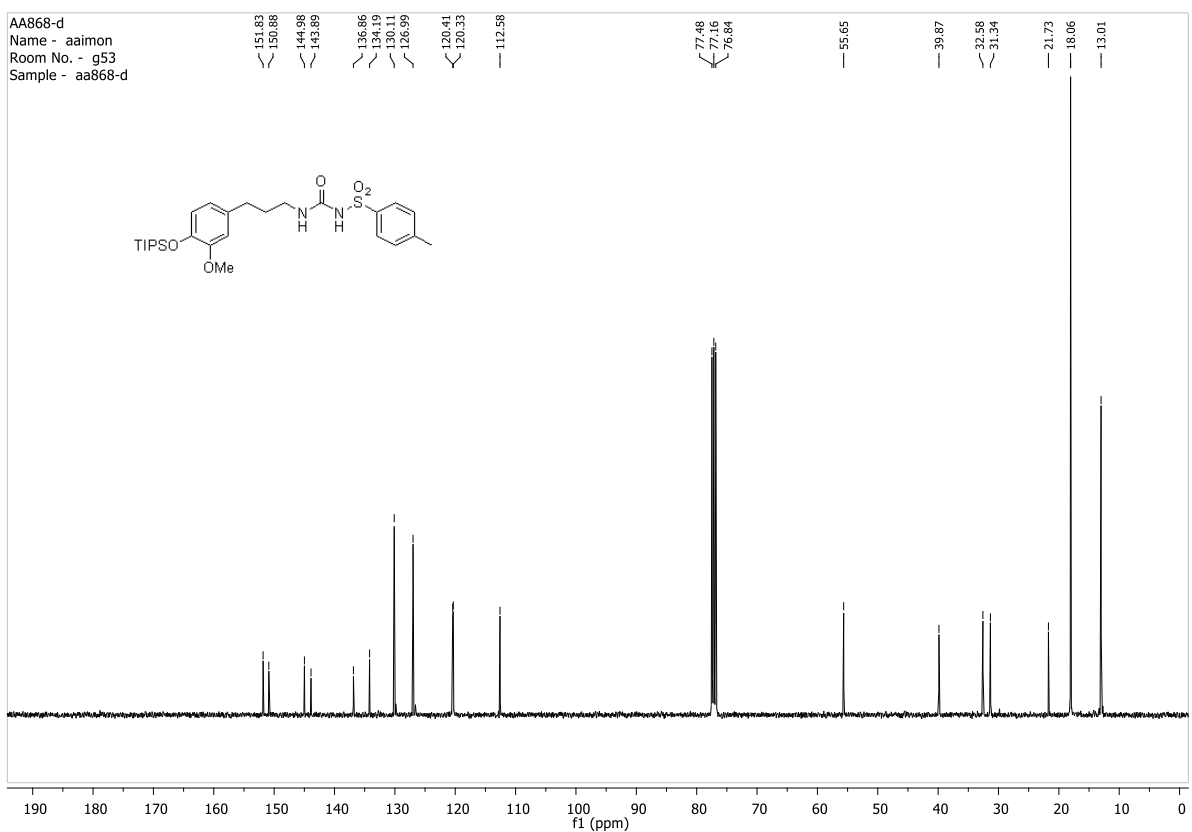



### 3-[3-(4-Hydroxy-3-methoxyphenyl)propyl]-1-(4-methylbenzenesulfonyl)urea 1m

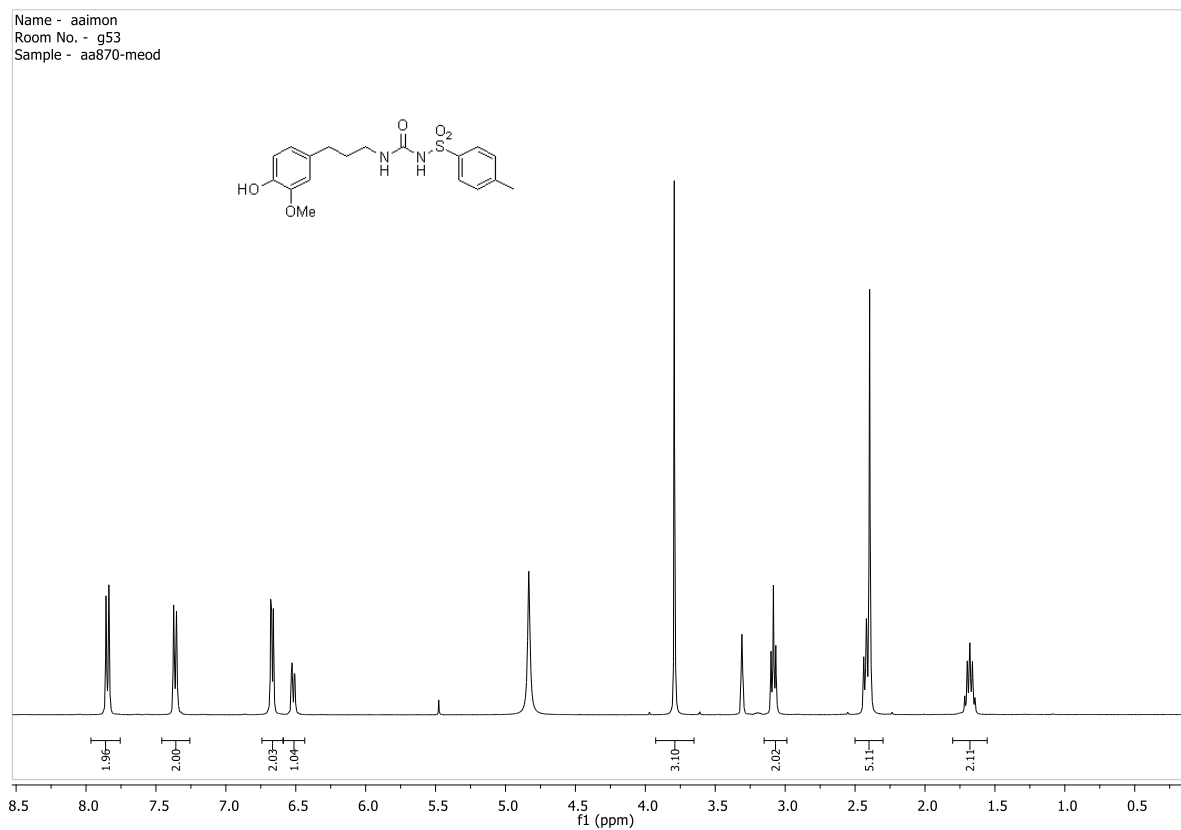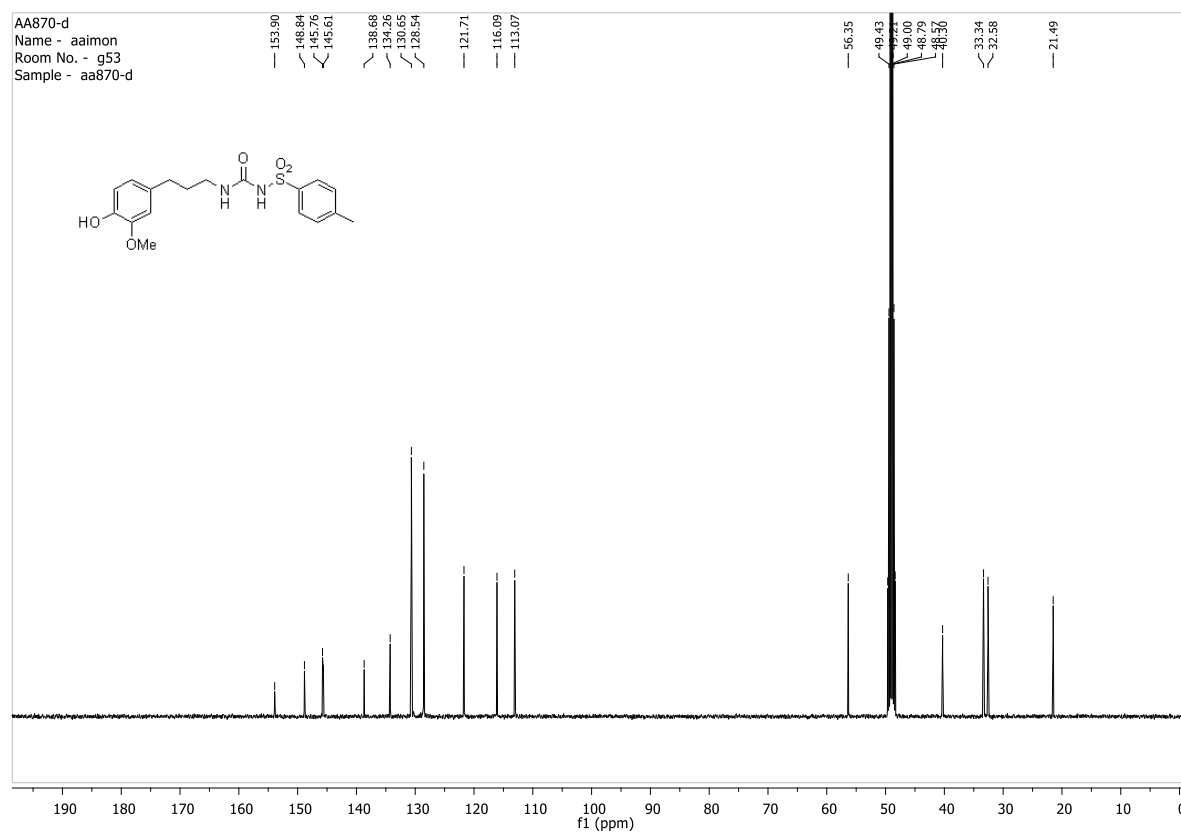

# 1-(4-Chlorophenyl)-3-[3-(3-methoxy-4-[[tris(propan-2-yl)silyl]oxy)phenyl)propyl]urea S9

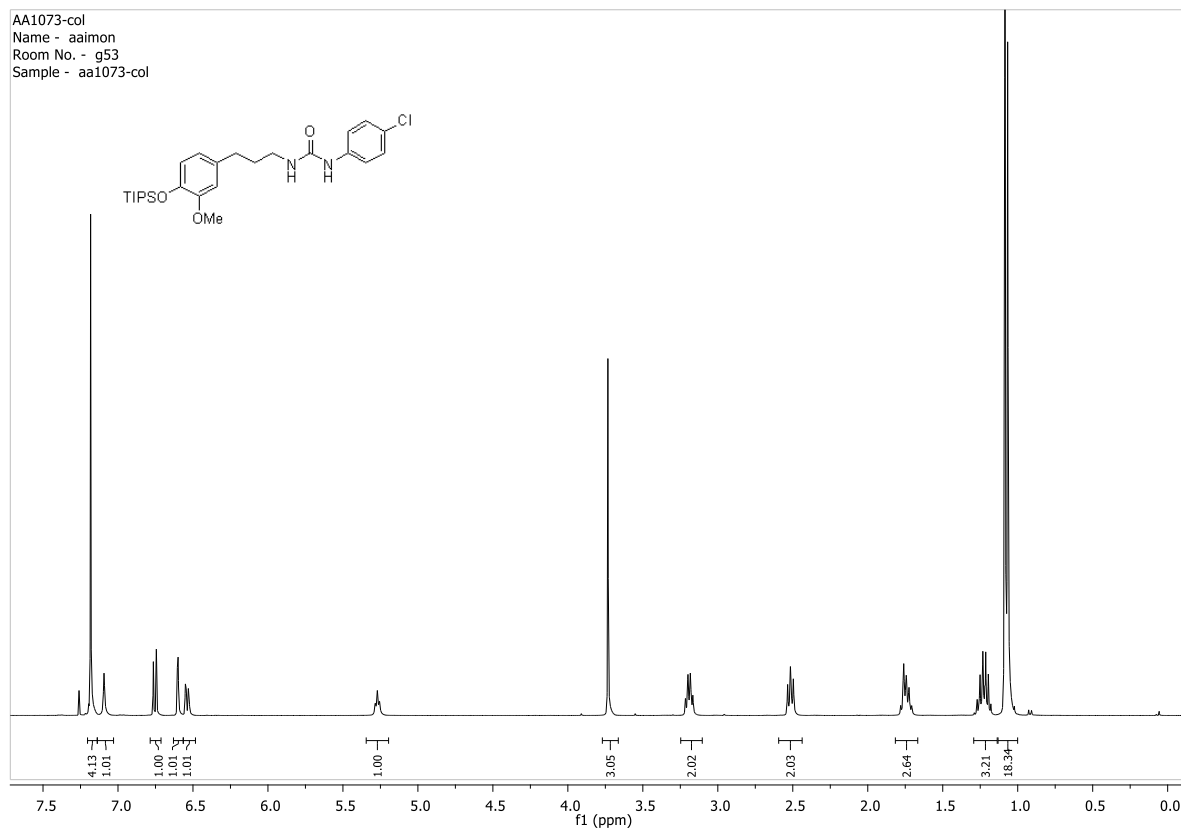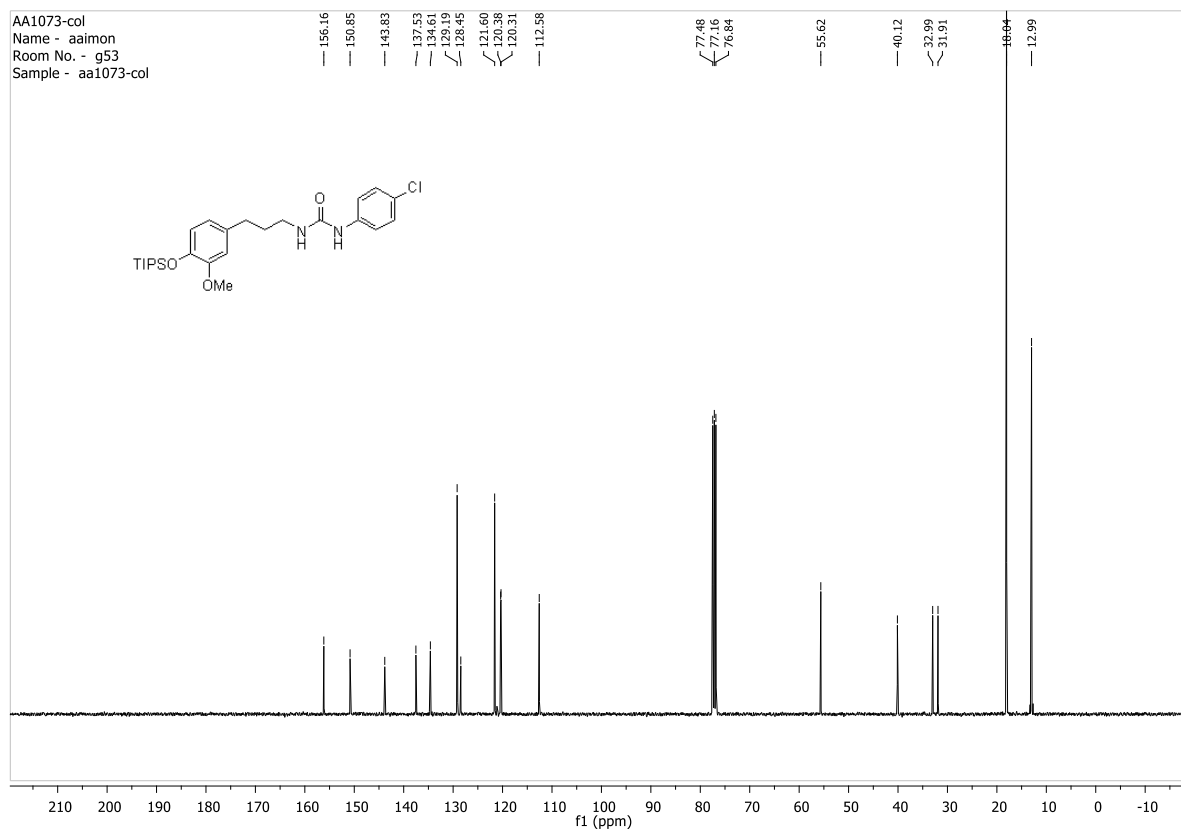

# 1-(4-Chlorophenyl)-3-[3-(4-hydroxy-3-methoxyphenyl)propyl]urea 1n

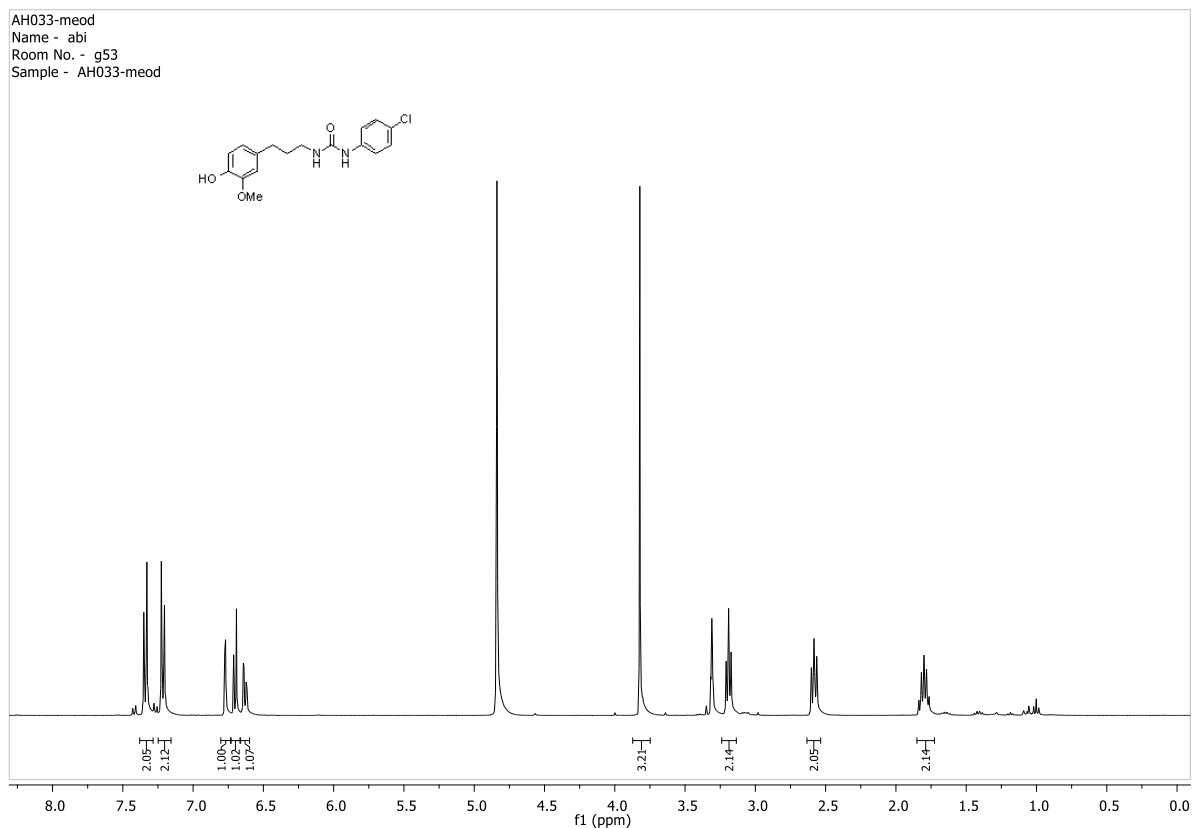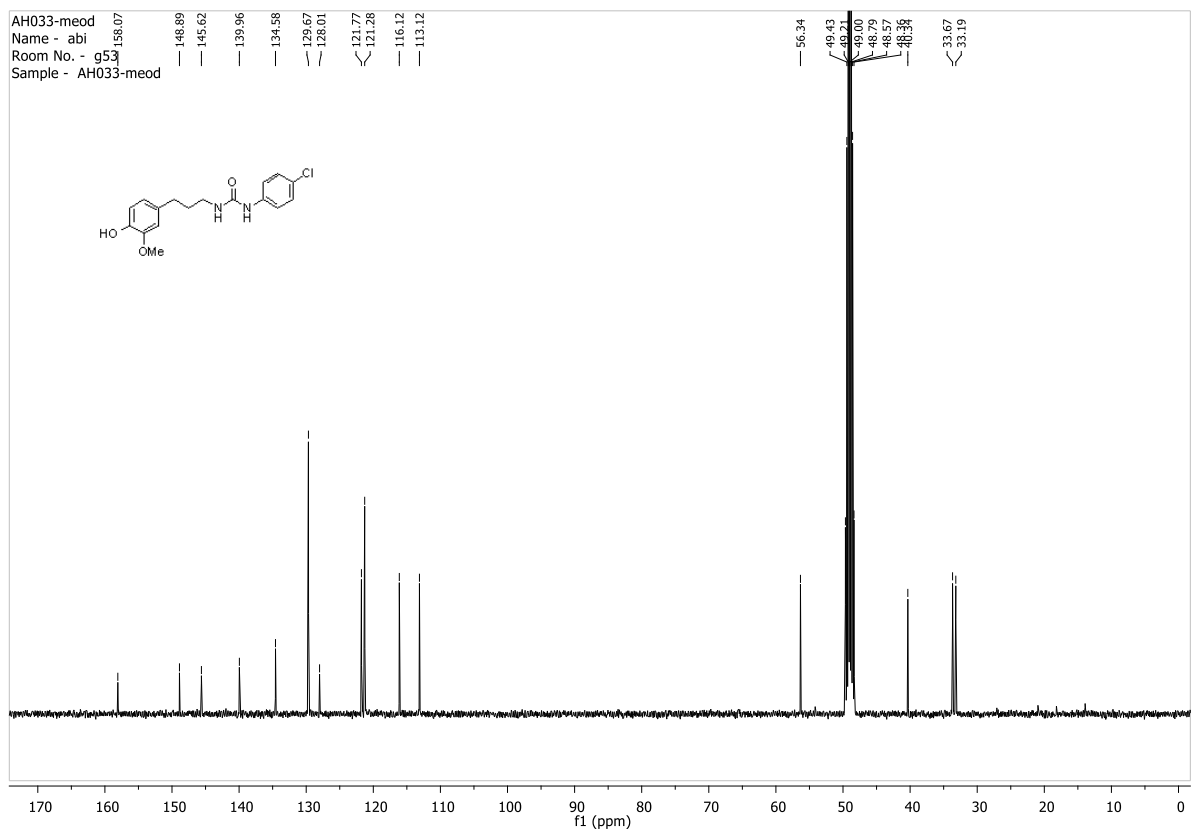

4-[[Tris(propan-2-yl)silyl]oxy]naphthalene-1-carbaldehyde S10

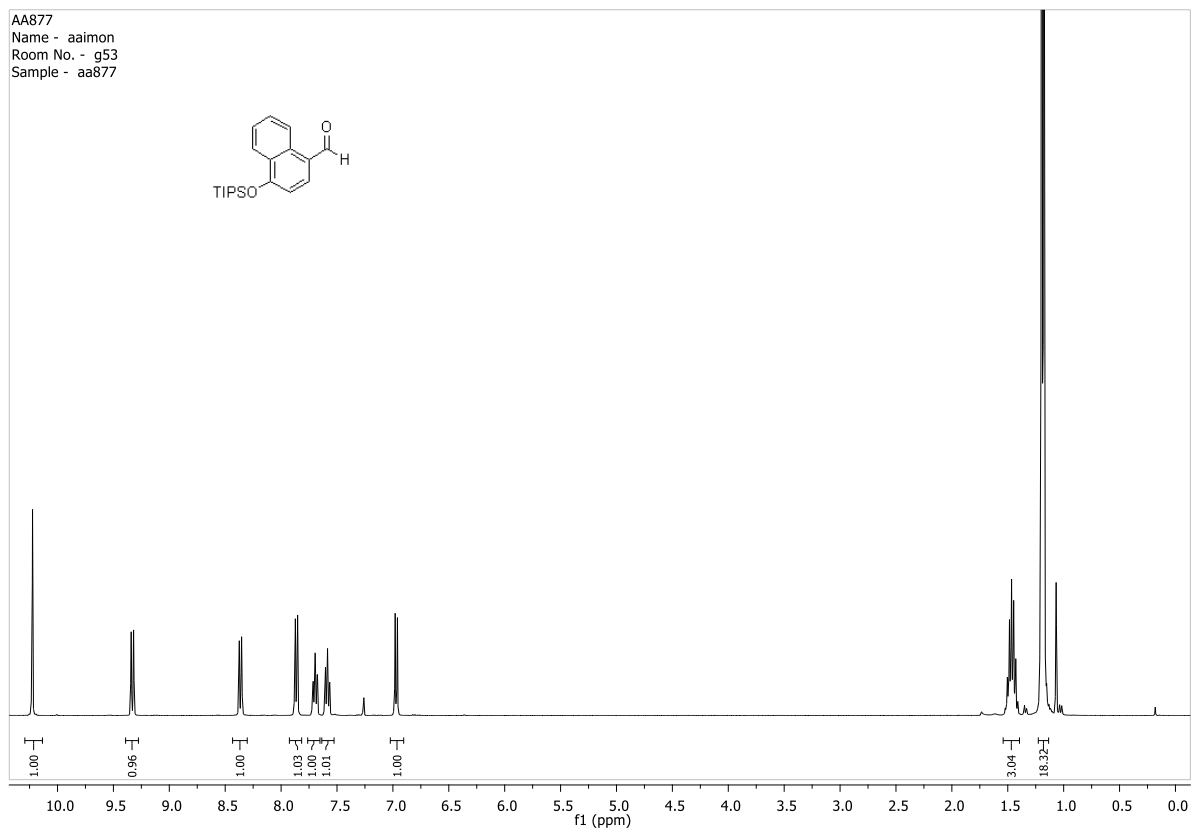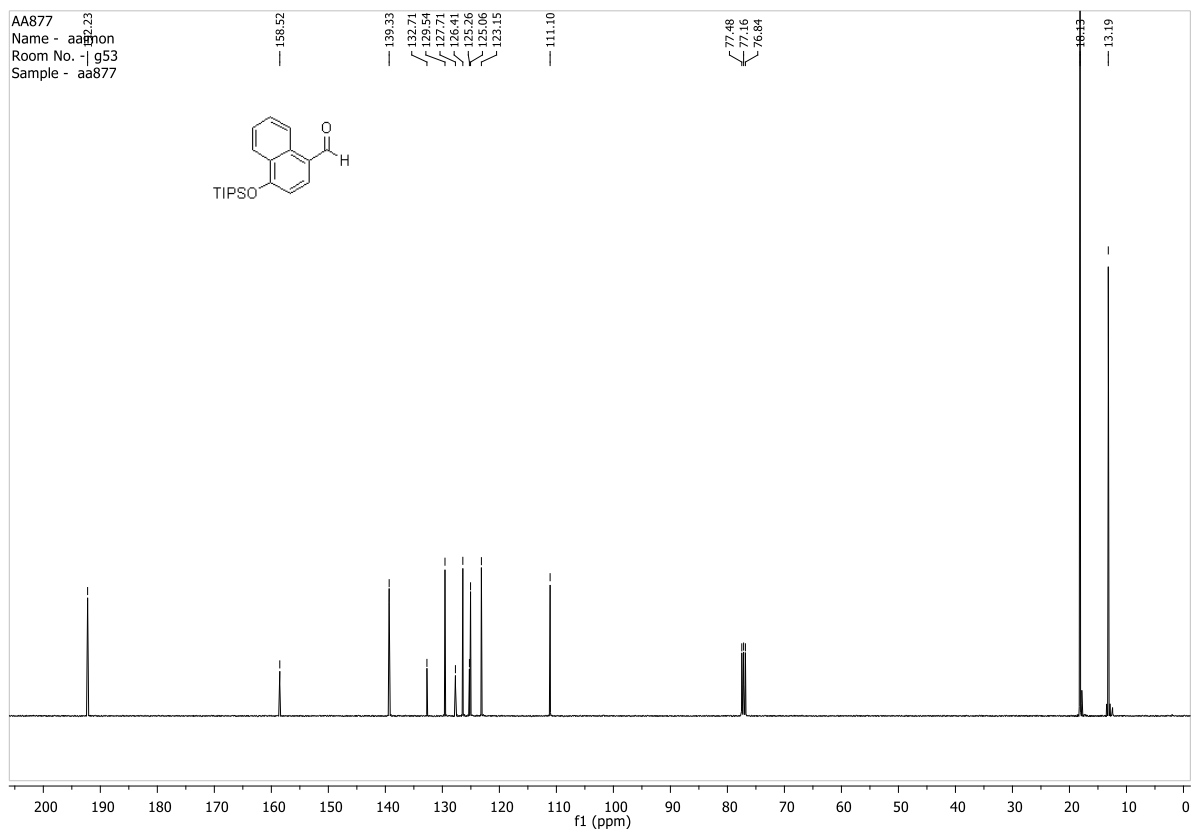

**(2E/2Z)-3-(4-{[Tris(propan-2-yl)silyl]oxy}naphthalen-1-yl)prop-2-enitrile S11**

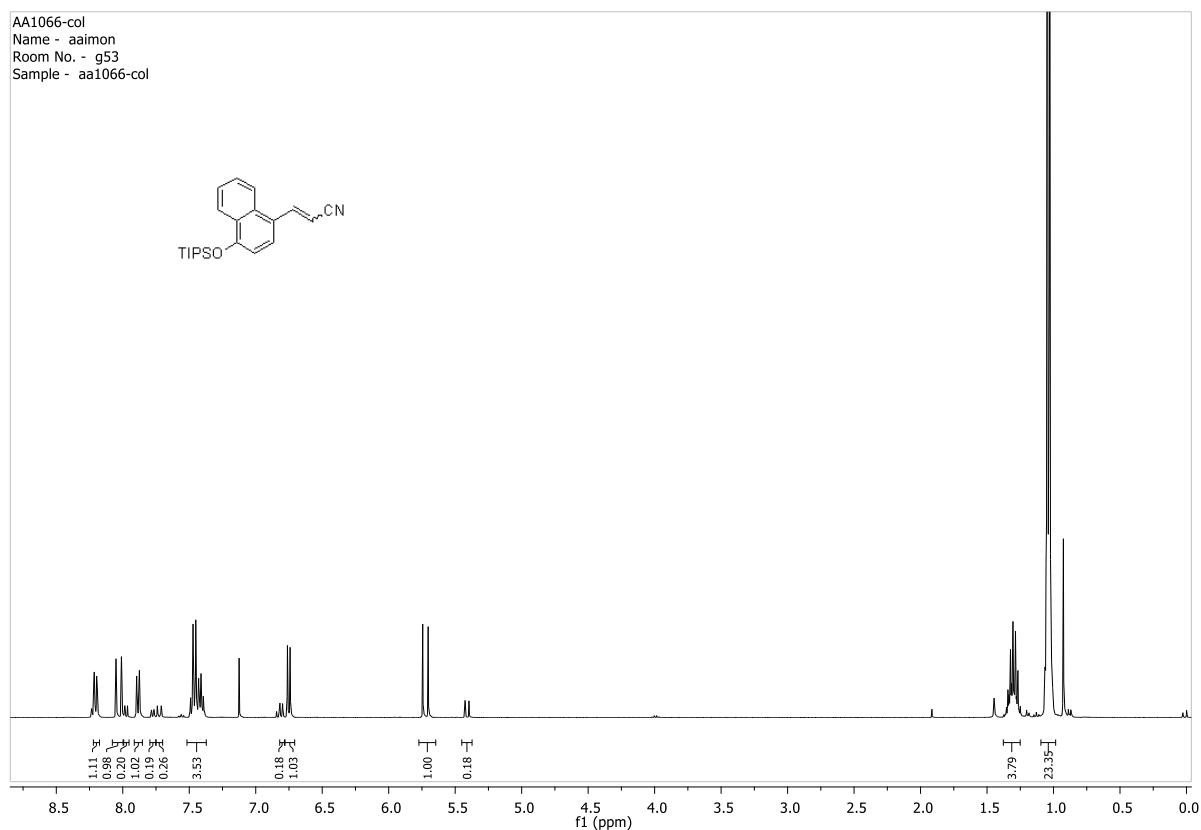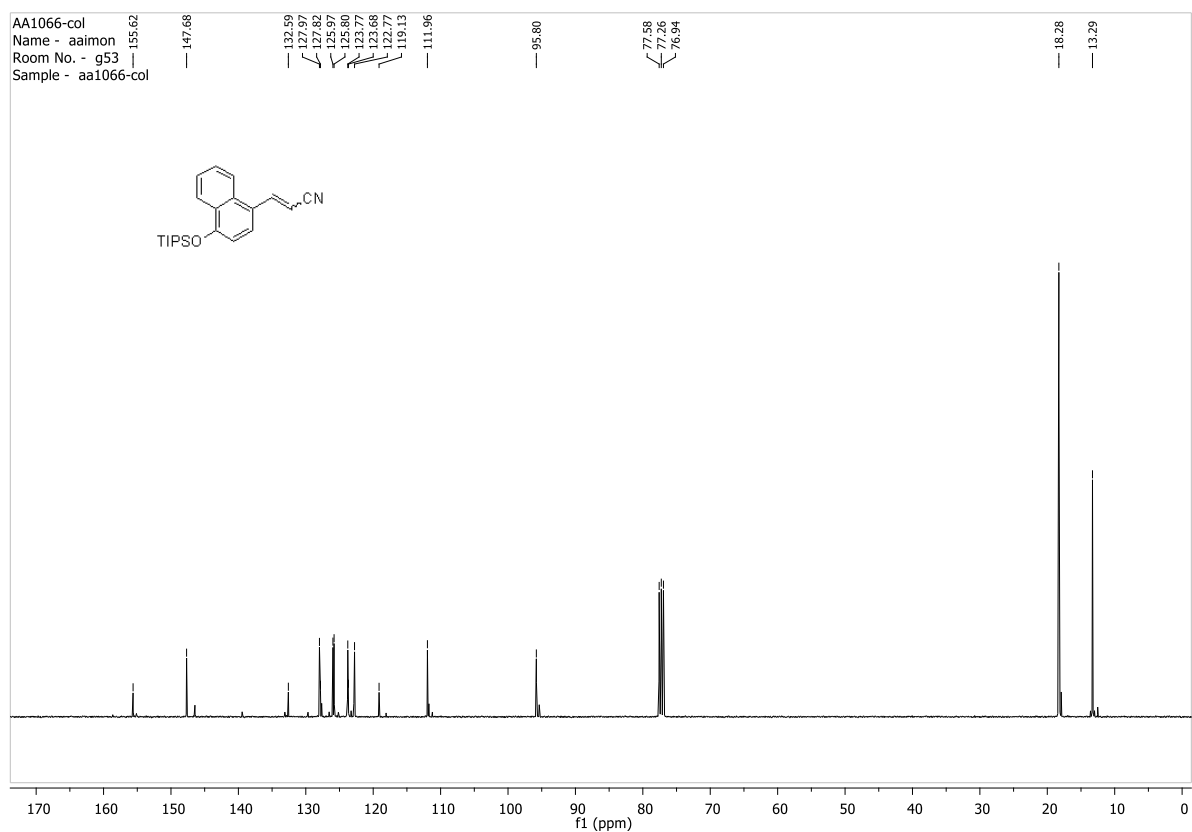

### 3-Cyclopropyl-1-[3-(4-[[tris(propan-2-yl)silyl]oxy)naphthalen-1-yl]propyl]urea S13

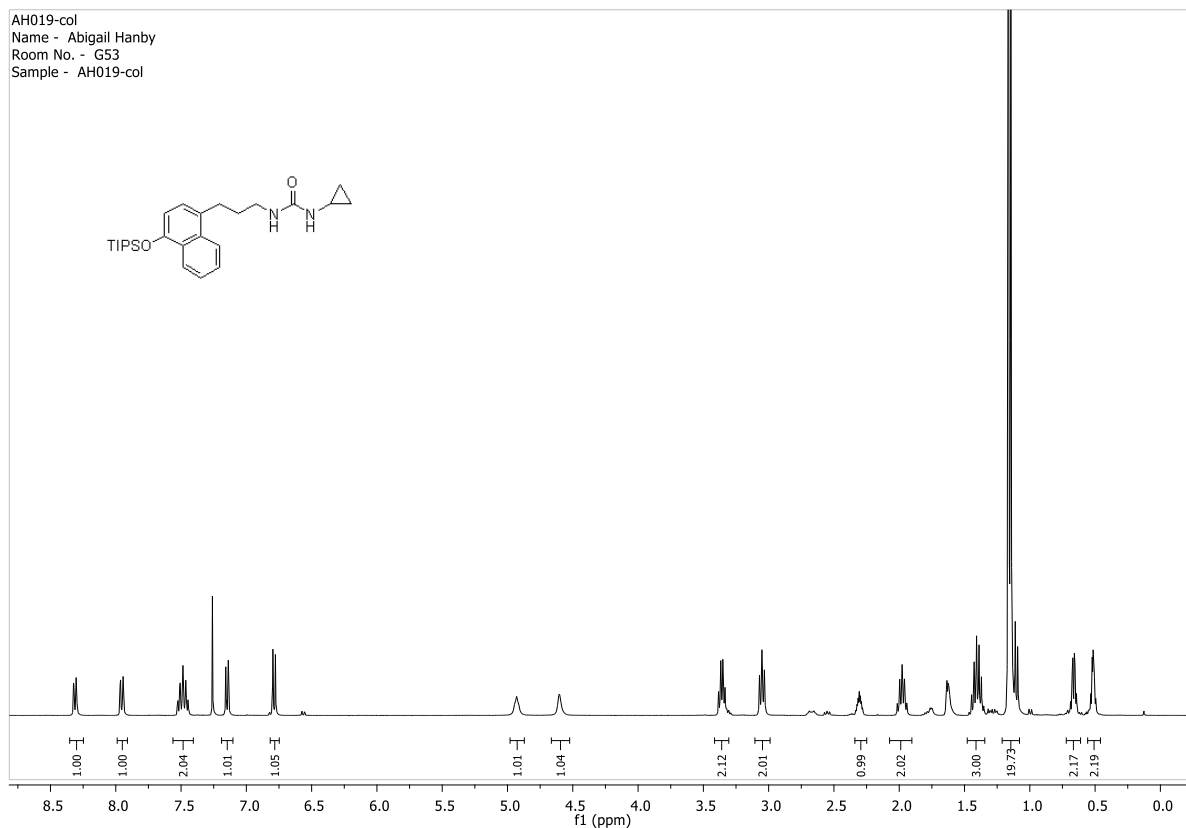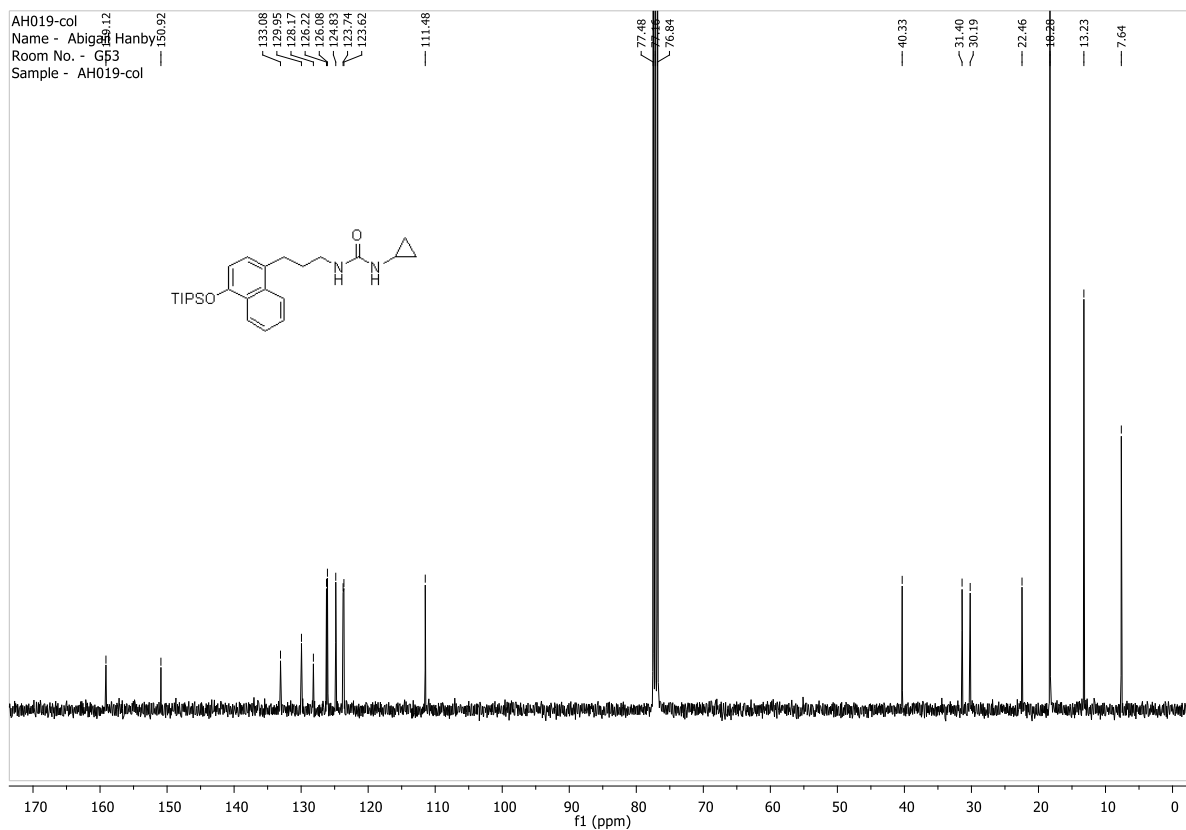

### 3-Cyclopropyl-1-[3-(4-hydroxynaphthalen-1-yl)propyl]urea 1o

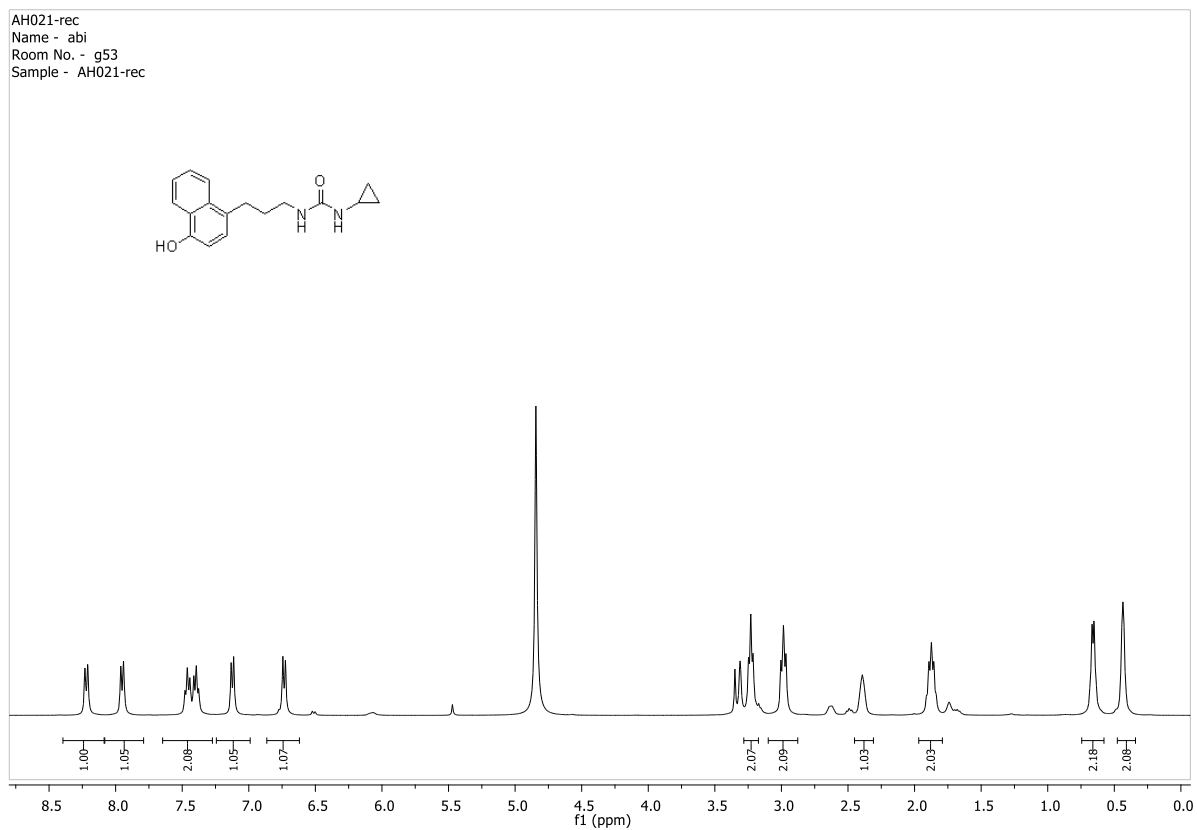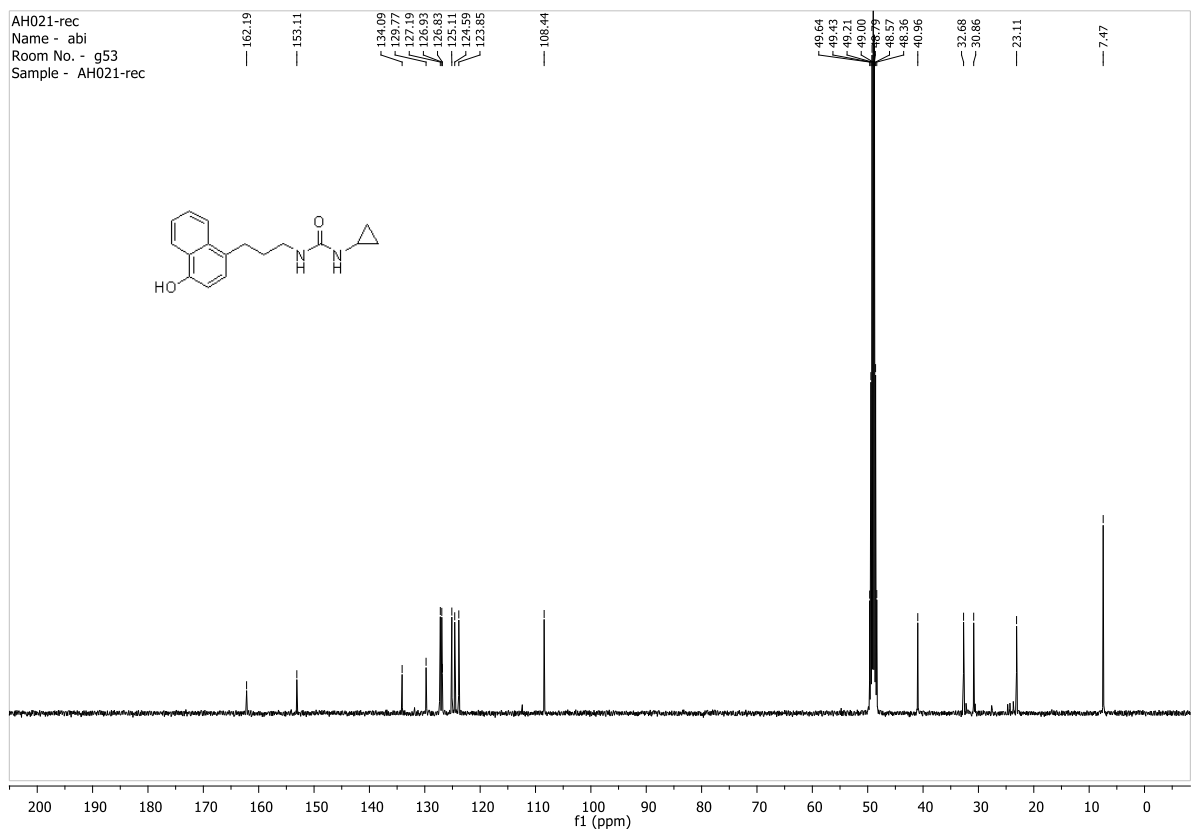

**Ethyl 2-({3-(4-{[tris(propan-2-yl)silyl]oxy)naphthalen-1-yl}propyl)carbamoyl}amino)-acetate S14**

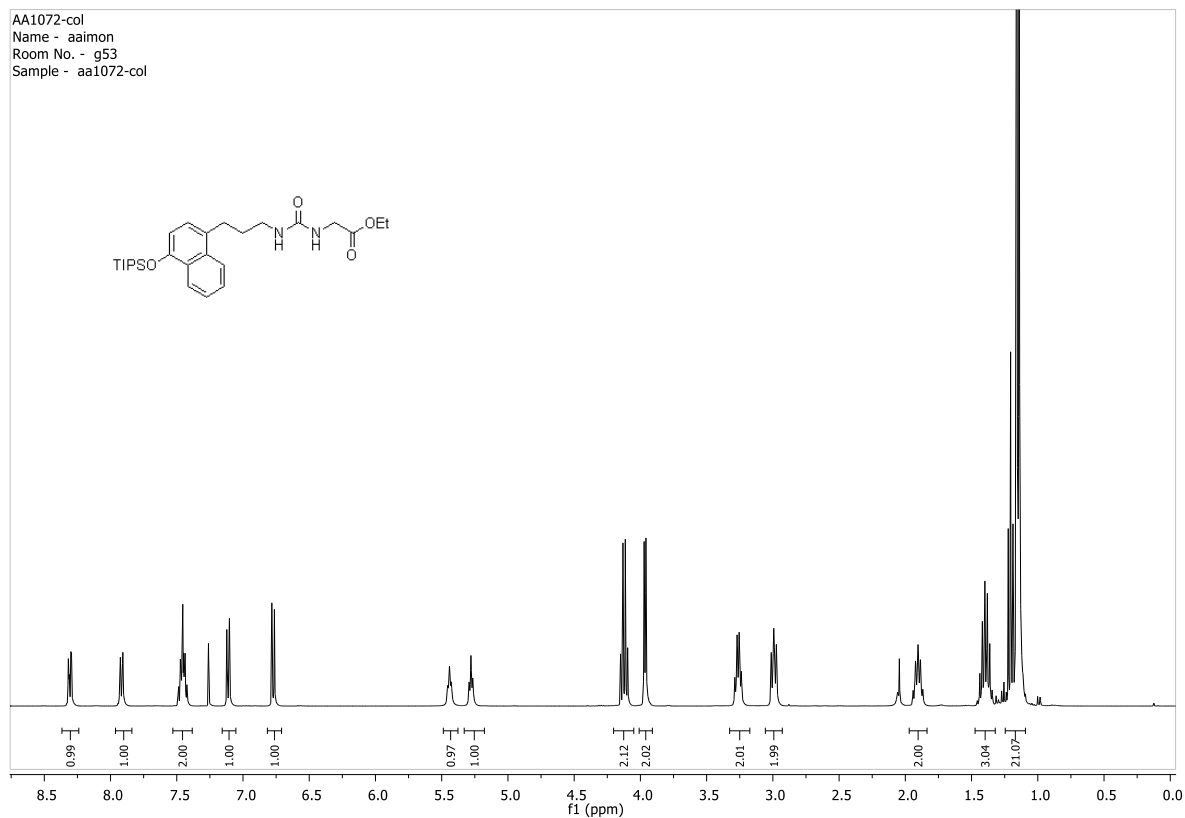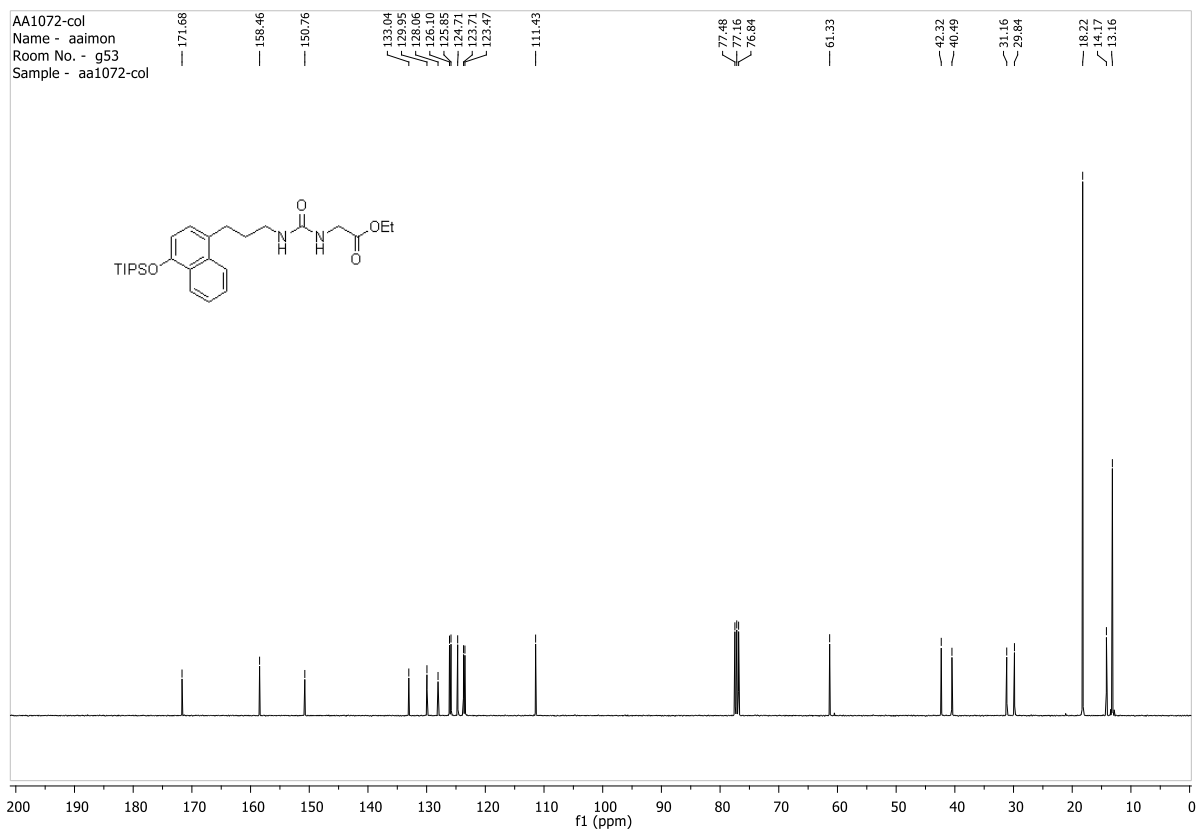



Ethyl 2-([3-(4-hydroxynaphthalen-1-yl)propyl]carbamoyl)amino)acetate 1p

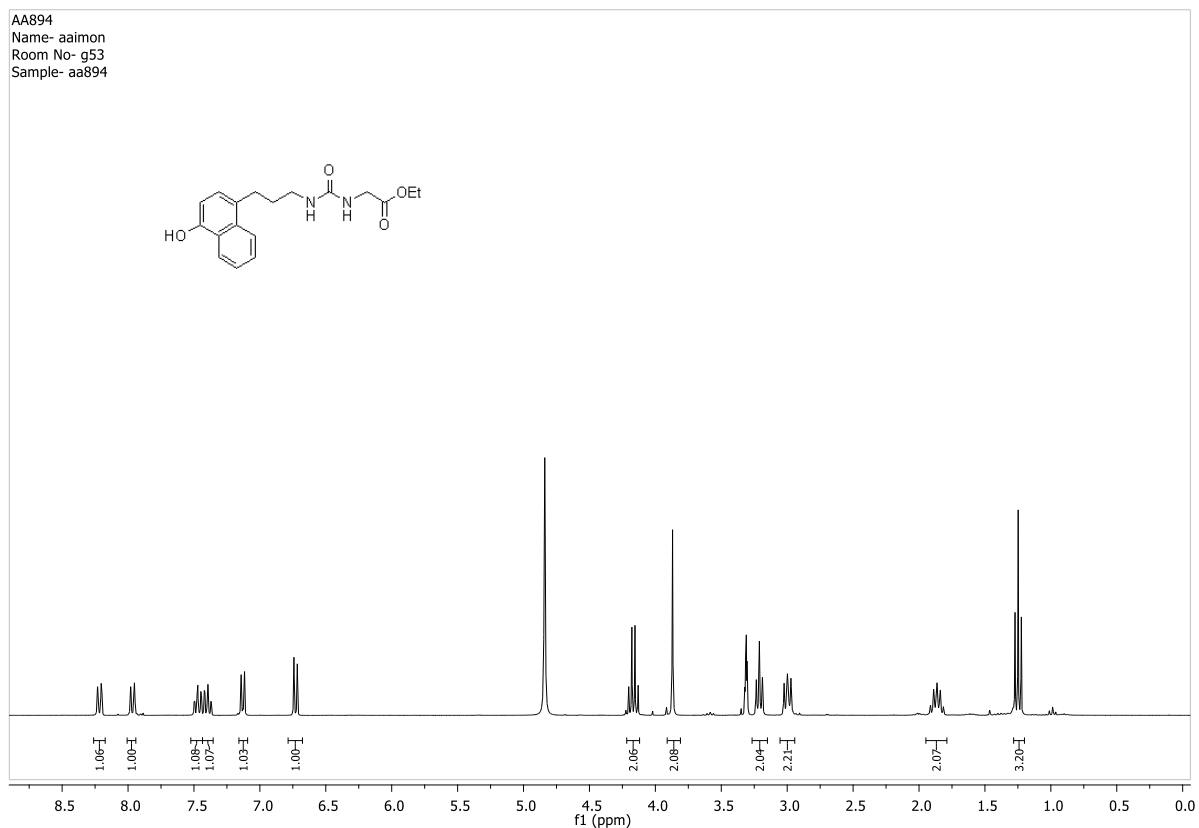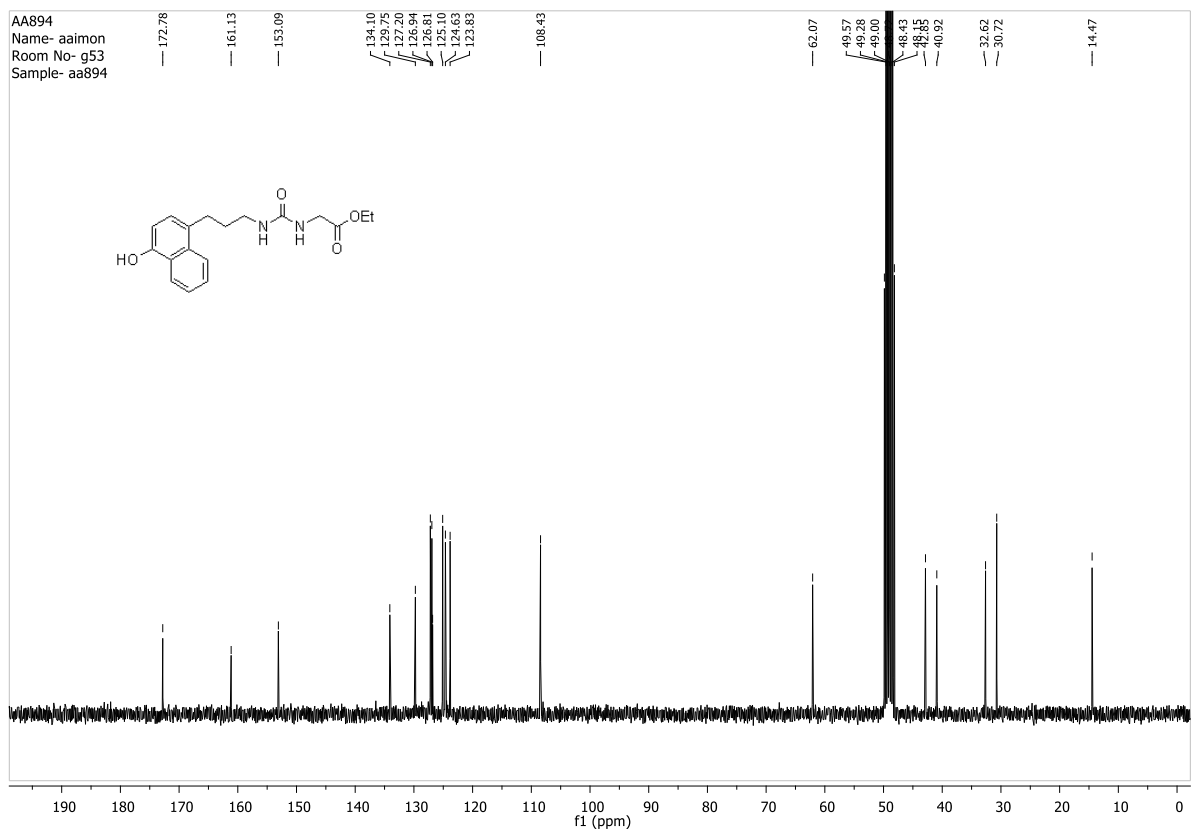

# 1-(4-Chlorophenyl)-3-[3-(4-{[tris(propan-2-yl)silyl]oxy}naphthalen-1-yl)propyl]urea S15

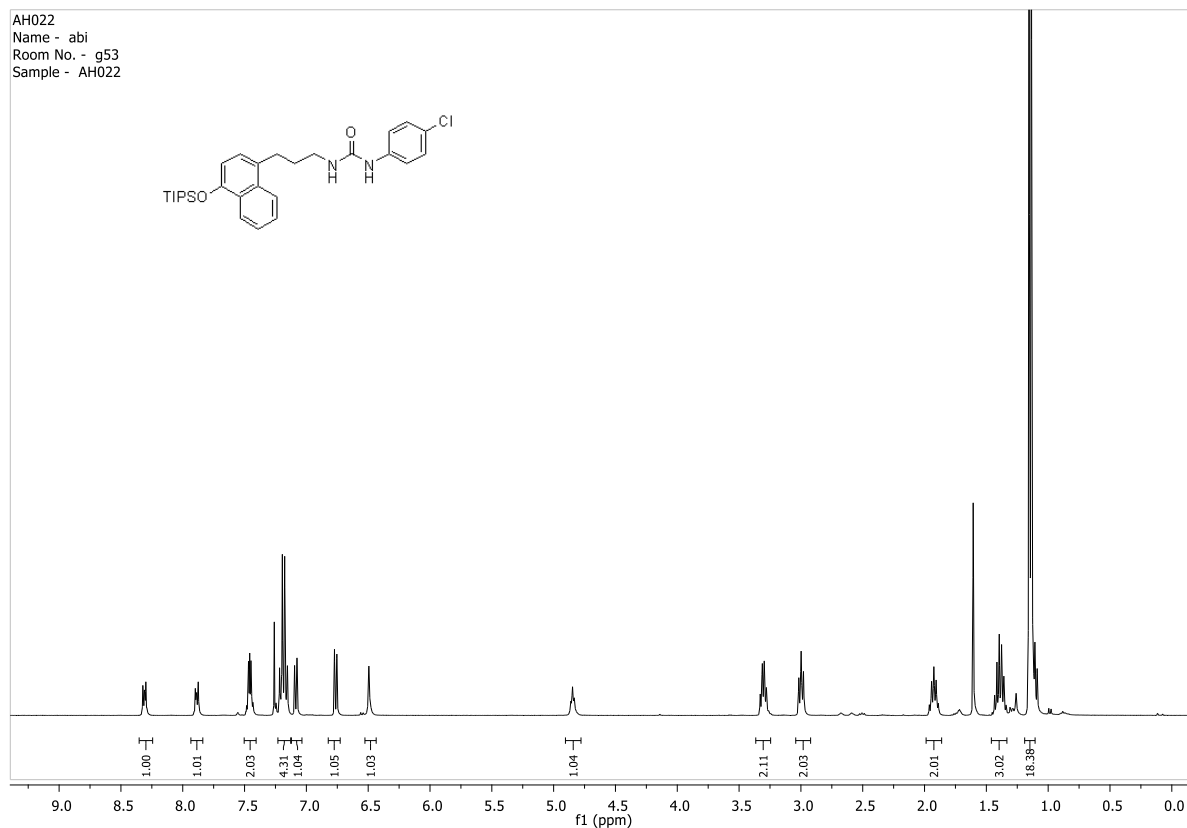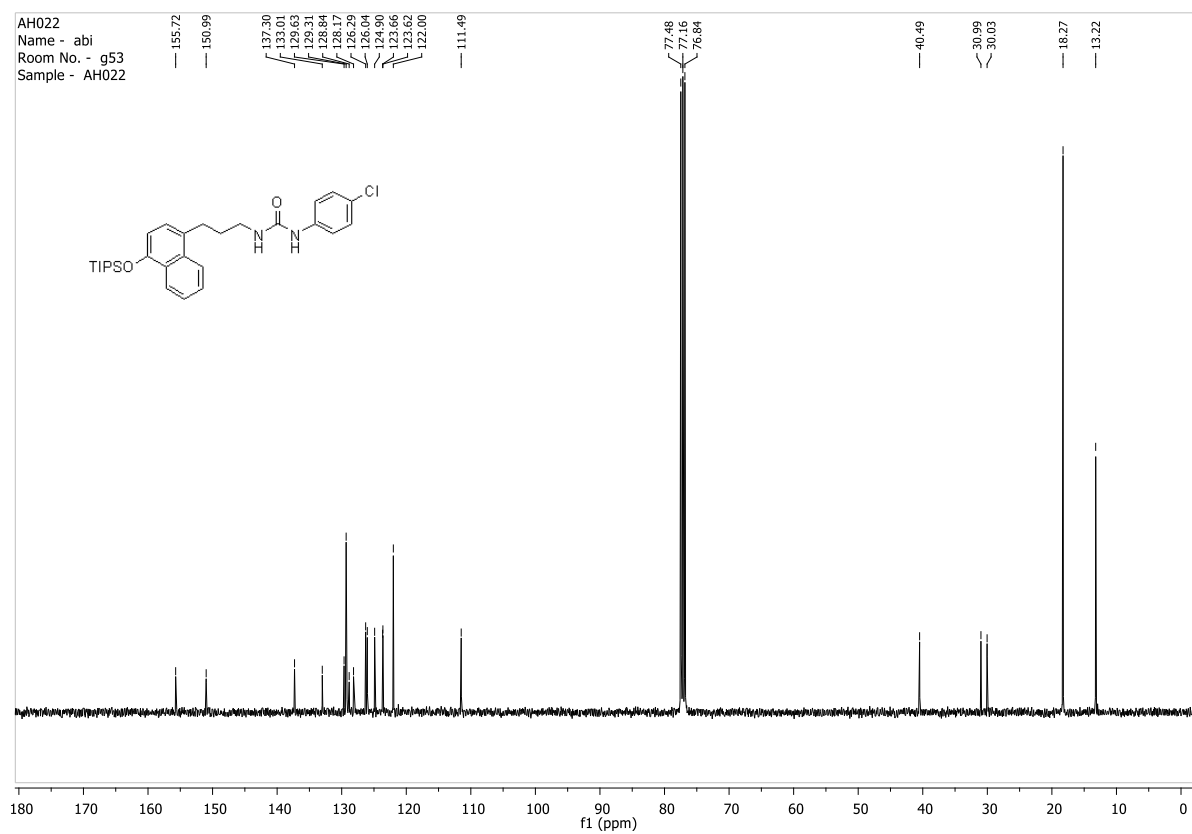

**1-(4-Chlorophenyl)-3-[3-(4-hydroxynaphthalen-1-yl)propyl]urea 1q**

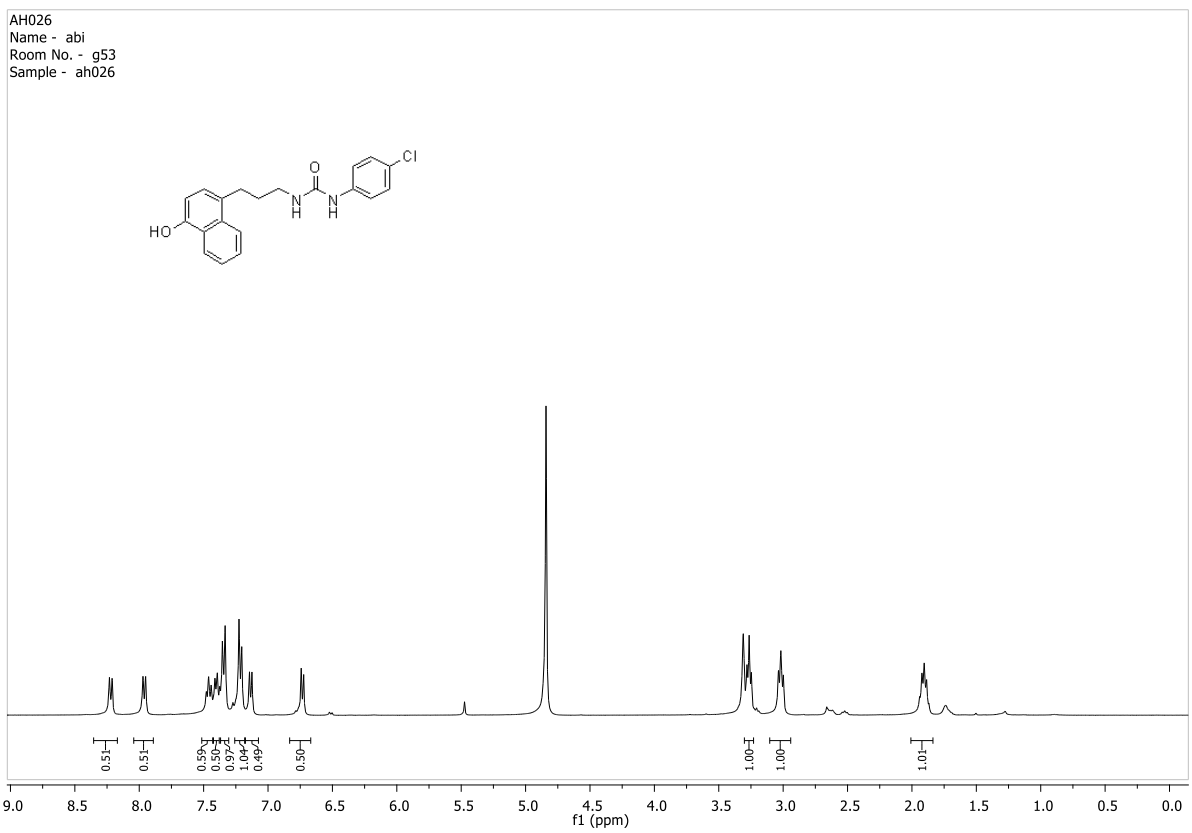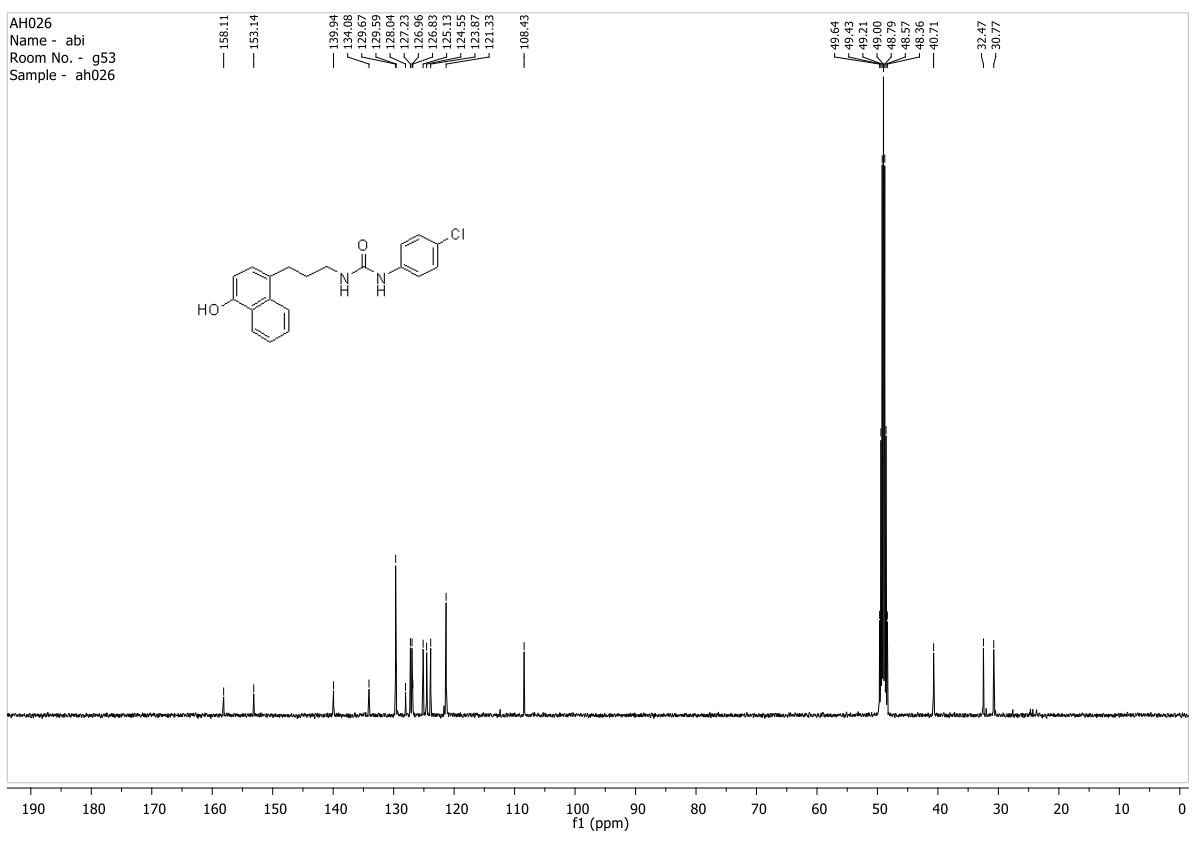

### 3-[3-(4-Hydroxynaphthalen-1-yl)propyl]-1-(4-methylbenzenesulfonyl)urea 1r

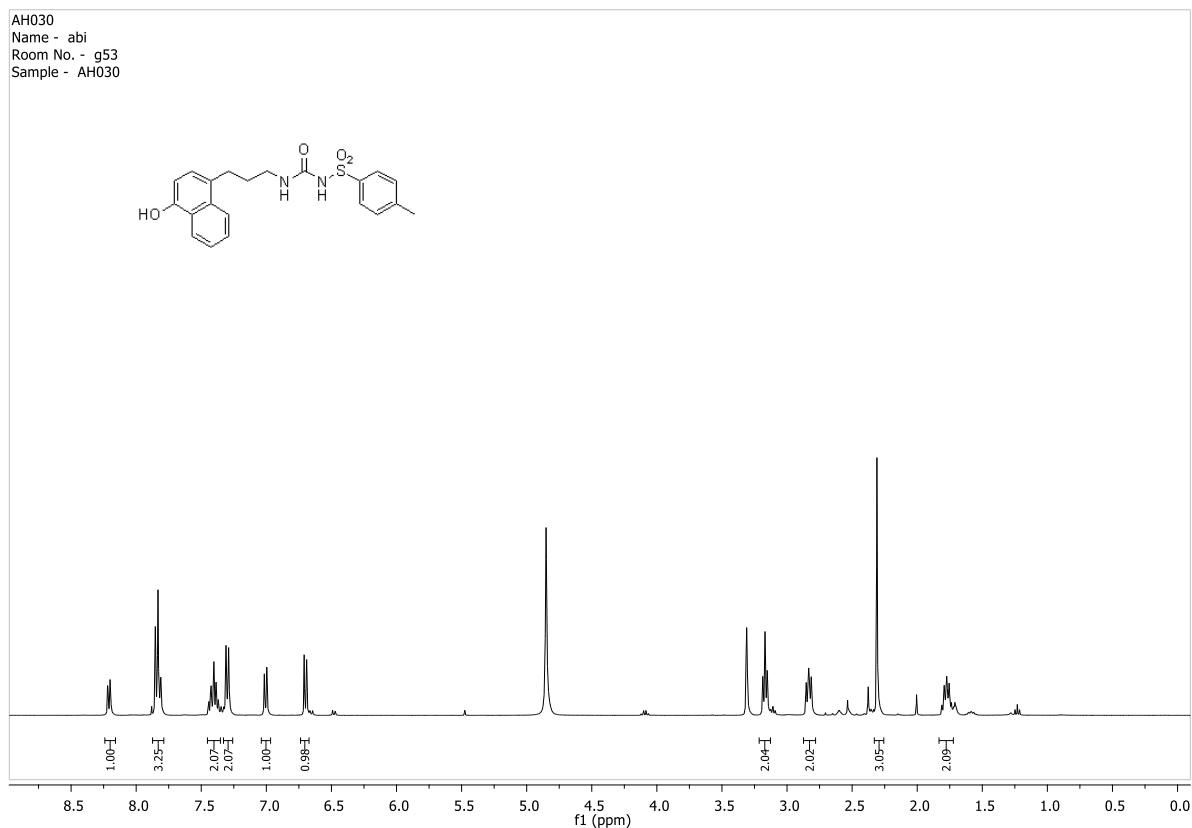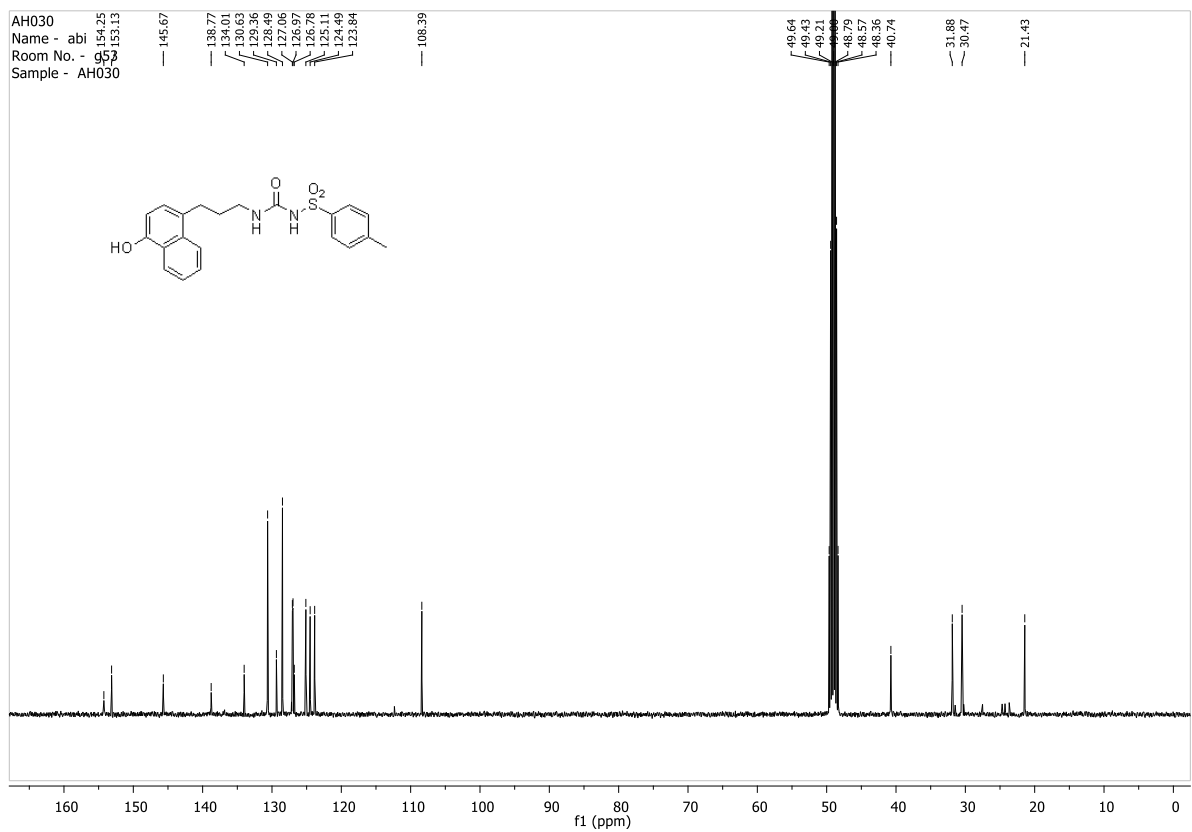

# 8-[[Tris(propan-2-yl)silyl]oxy]quinoline-5-carbaldehyde S16

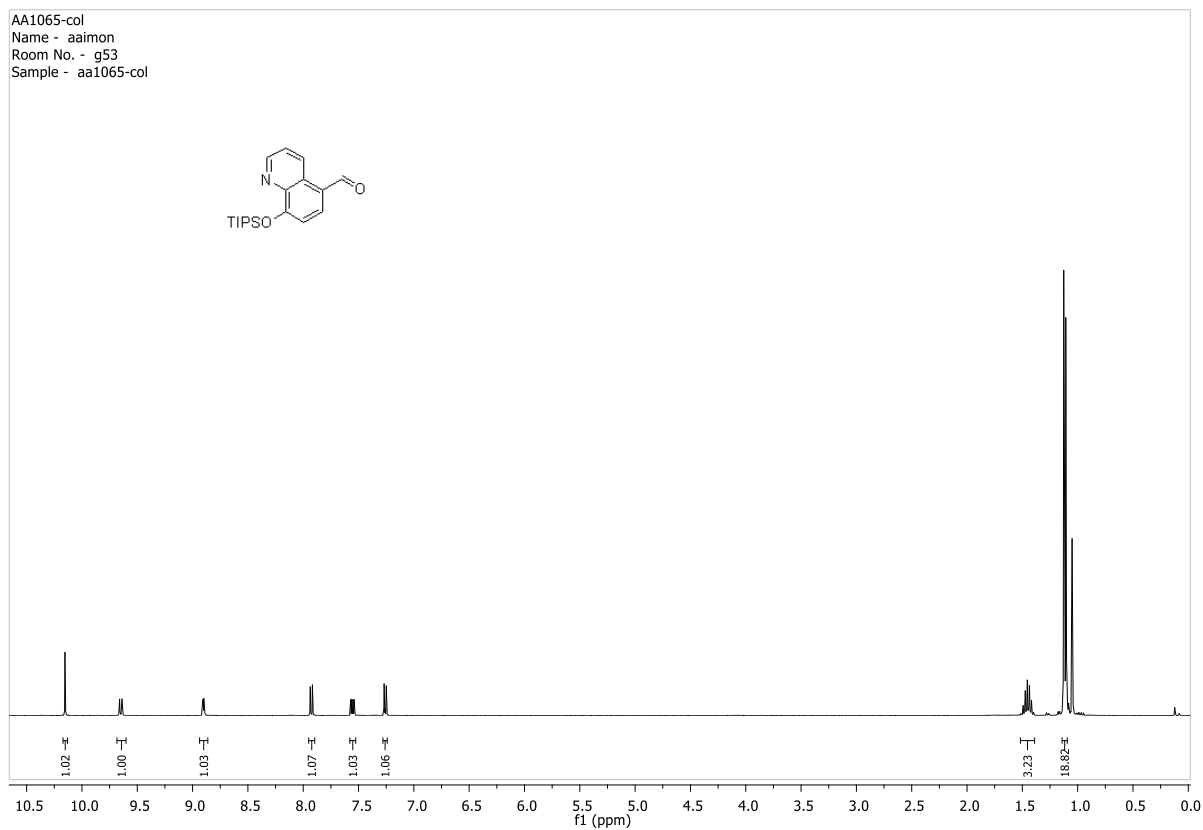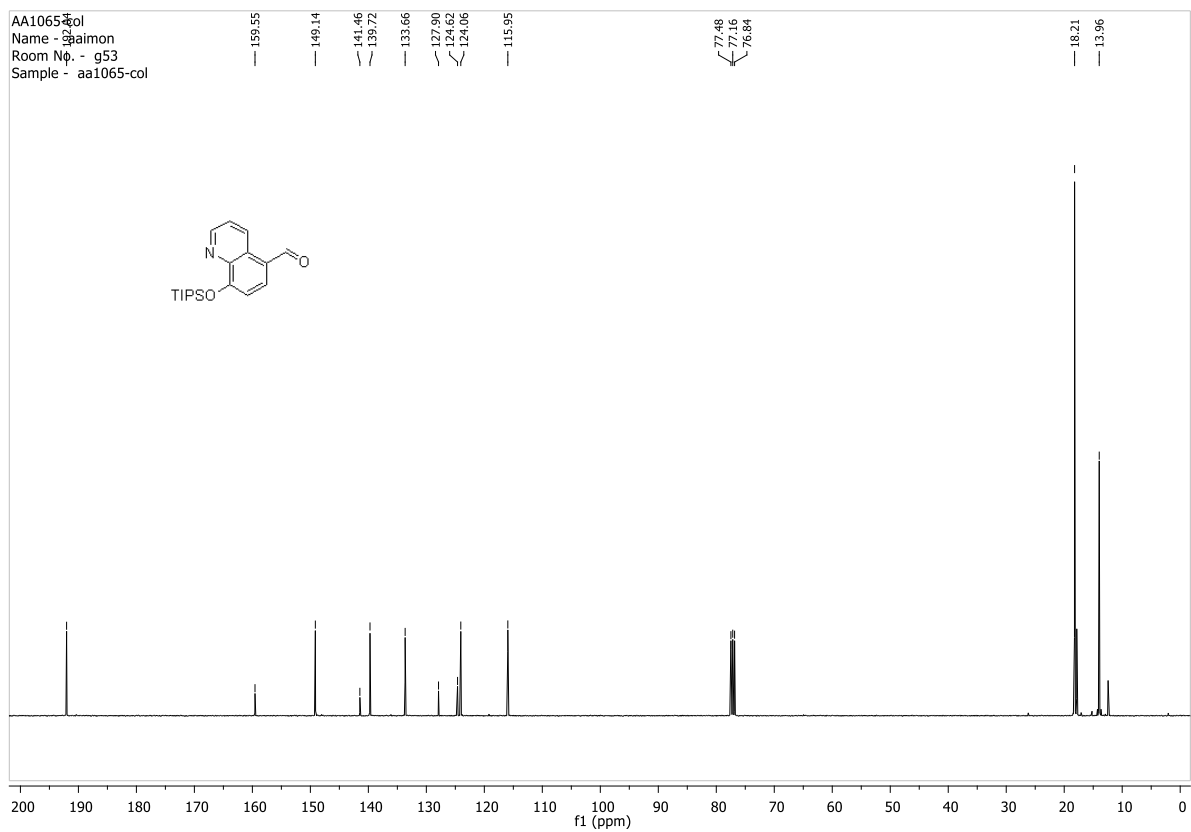

**(2E/Z)-3-(8-{[Tris(propan-2-yl)silyl]oxy}quinolin-5-yl)prop-2-enitrile S17**

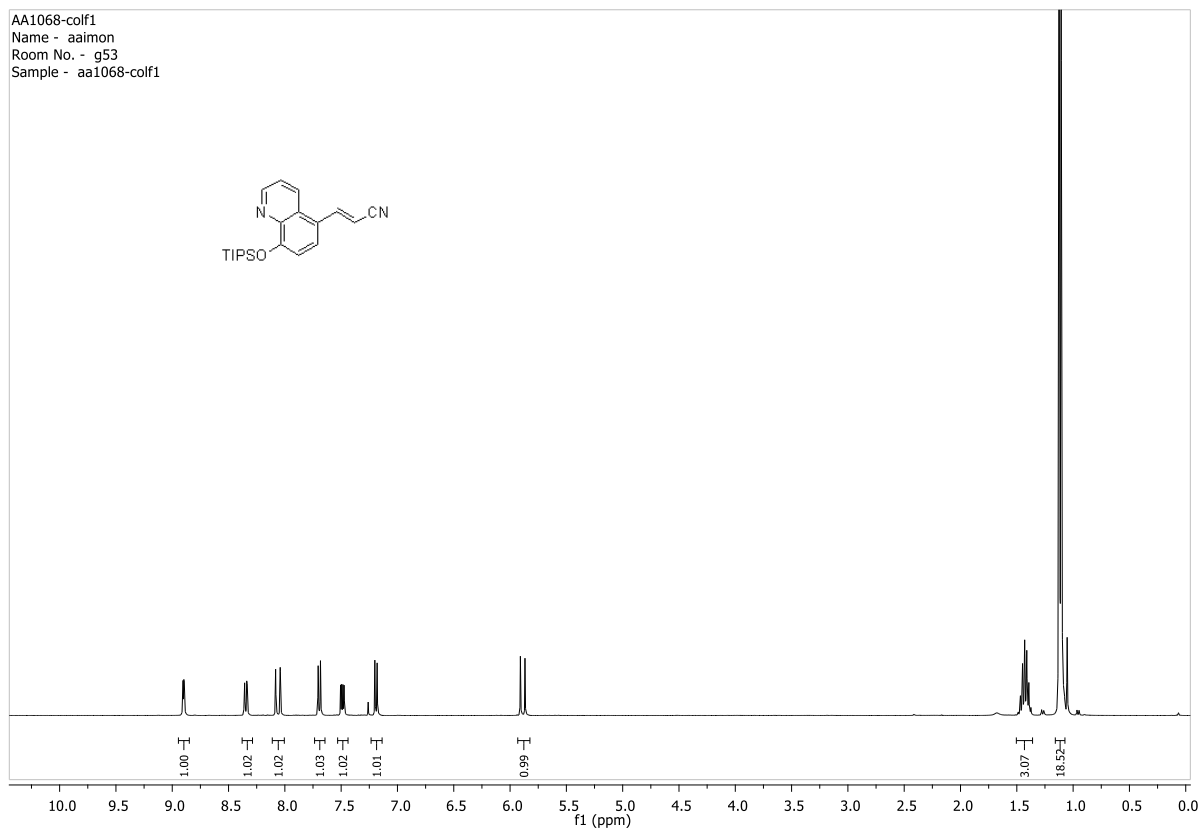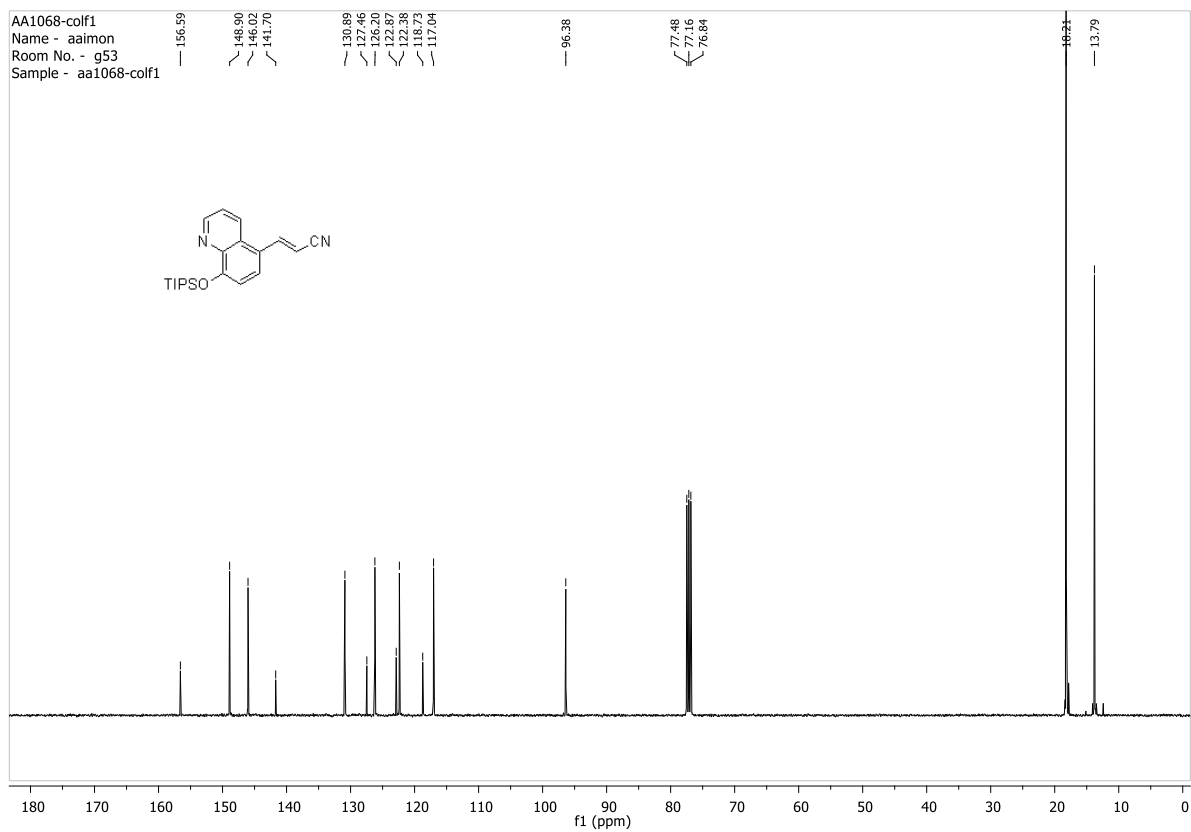

AA1068-colf2  
Name - aaimon  
Room No. - g53  
Sample - aa1068-colf2

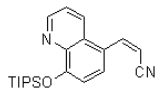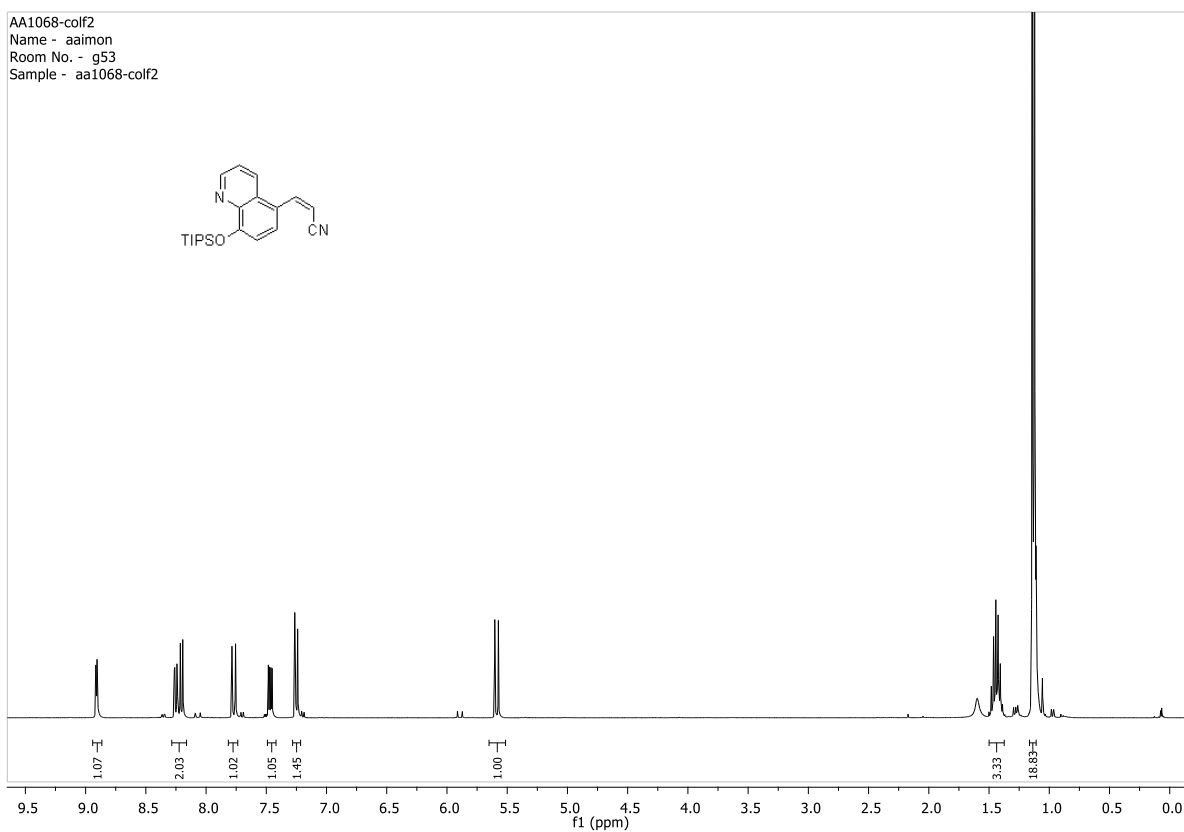

AA1068-colf2  
Name - aaimon  
Room No. - g53  
Sample - aa1068-colf2

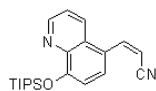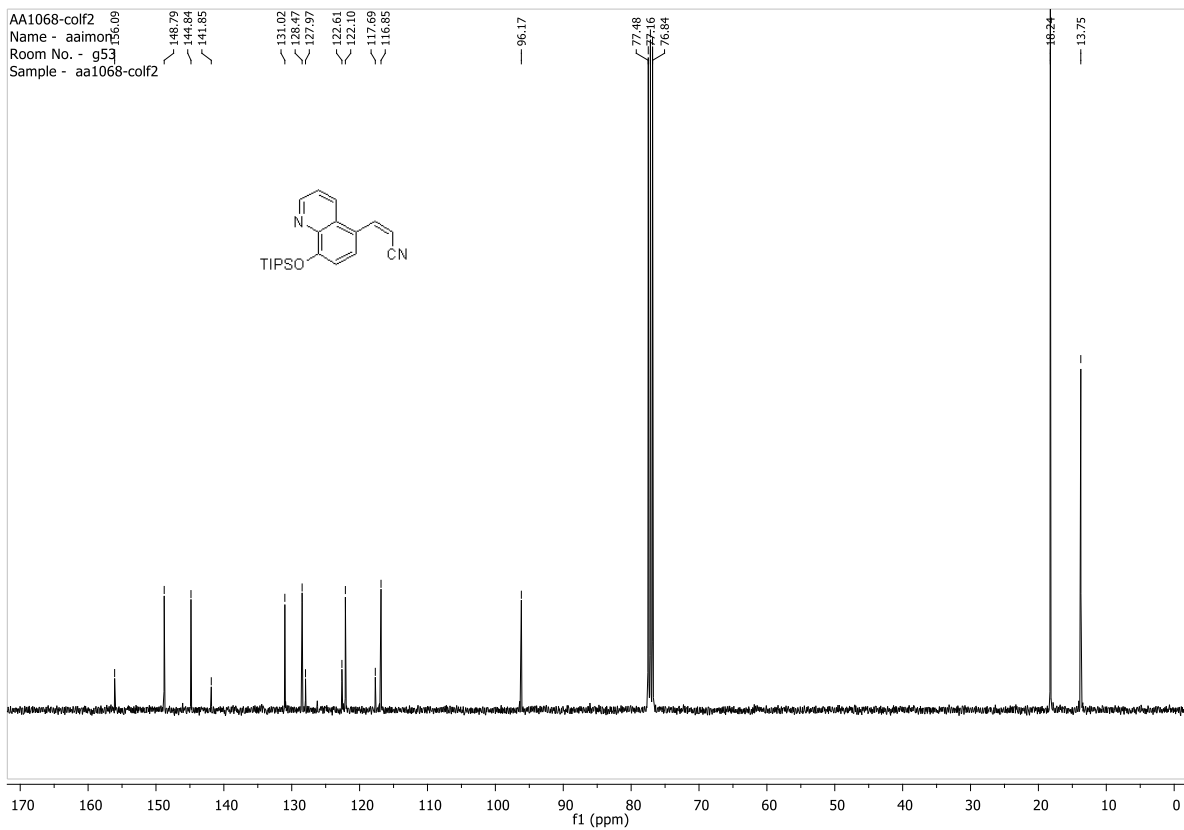

**3-Cyclopropyl-1-[3-(8-{[tris(propan-2-yl)silyl]oxy}-1,2,3,4-tetrahydroquinolin-5-yl)propyl]urea S19**

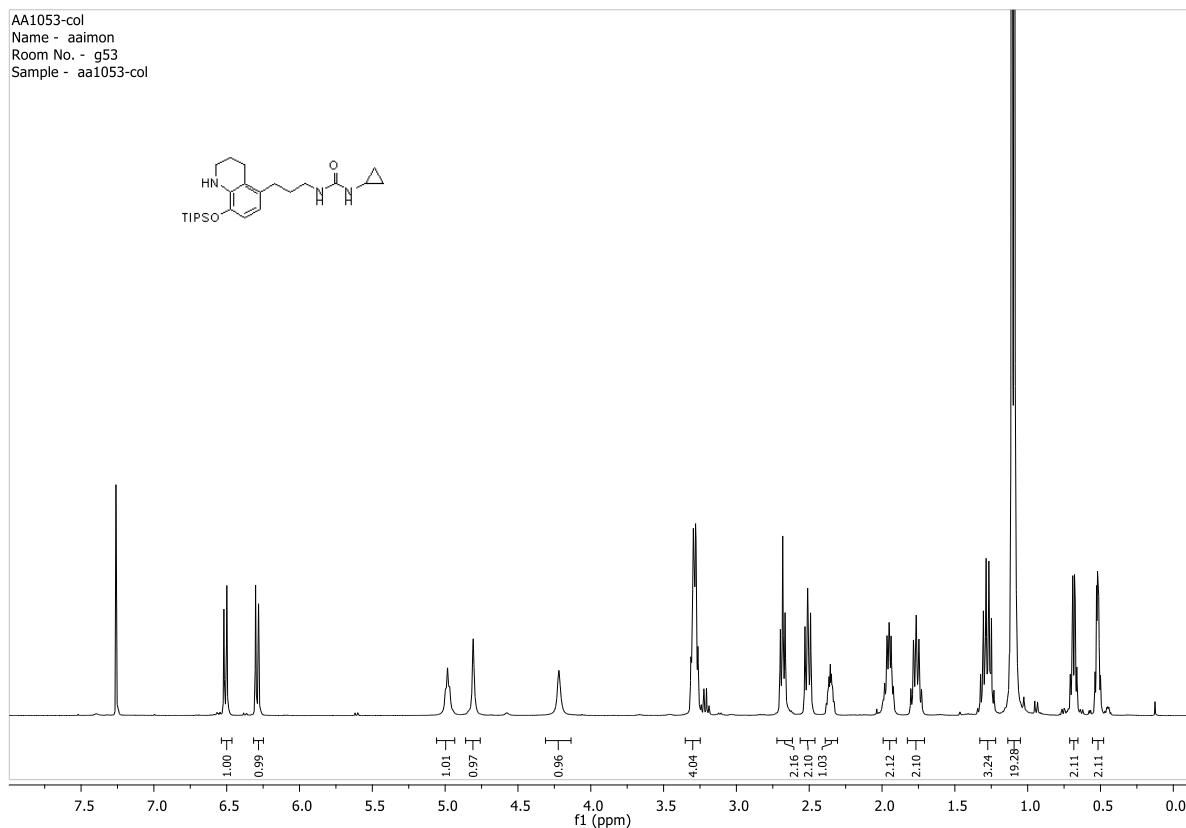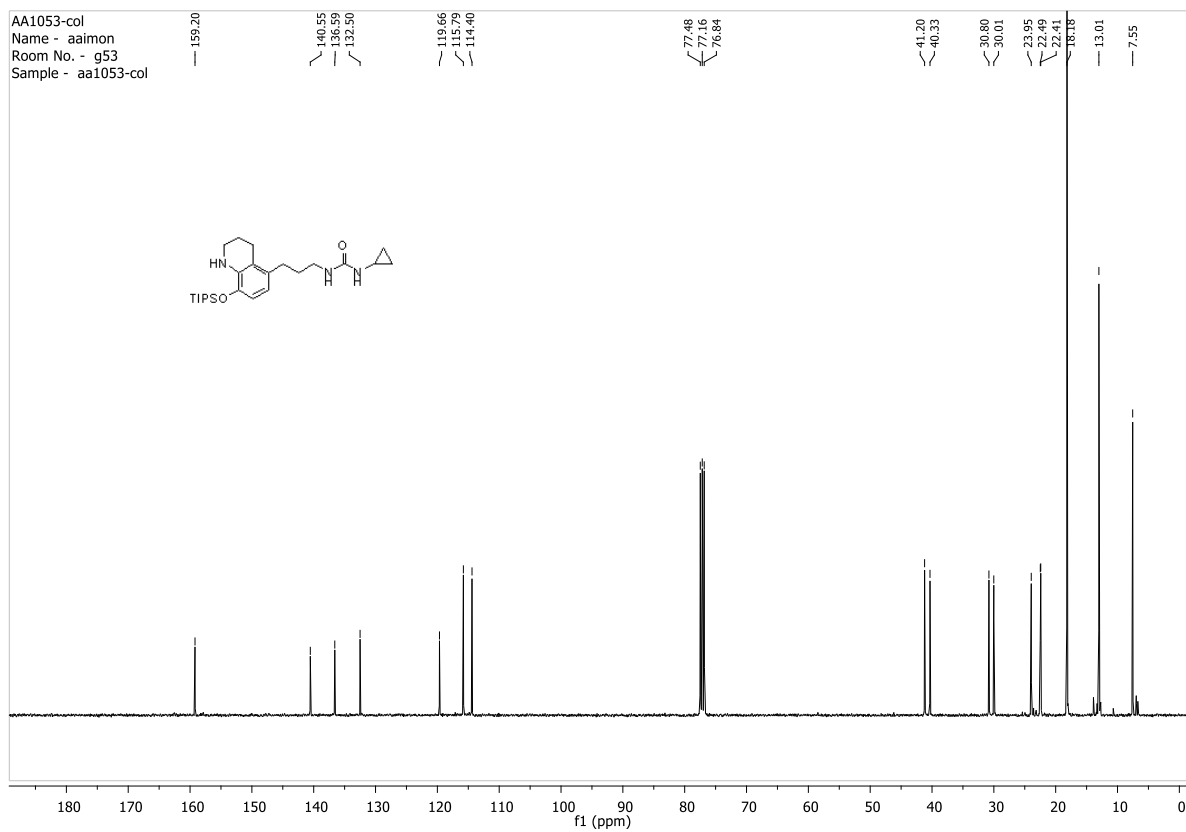



# 1-[3-(1-Acetyl-8-hydroxy-1,2,3,4-tetrahydroquinolin-5-yl)propyl]-3-cyclopropylurea 1s

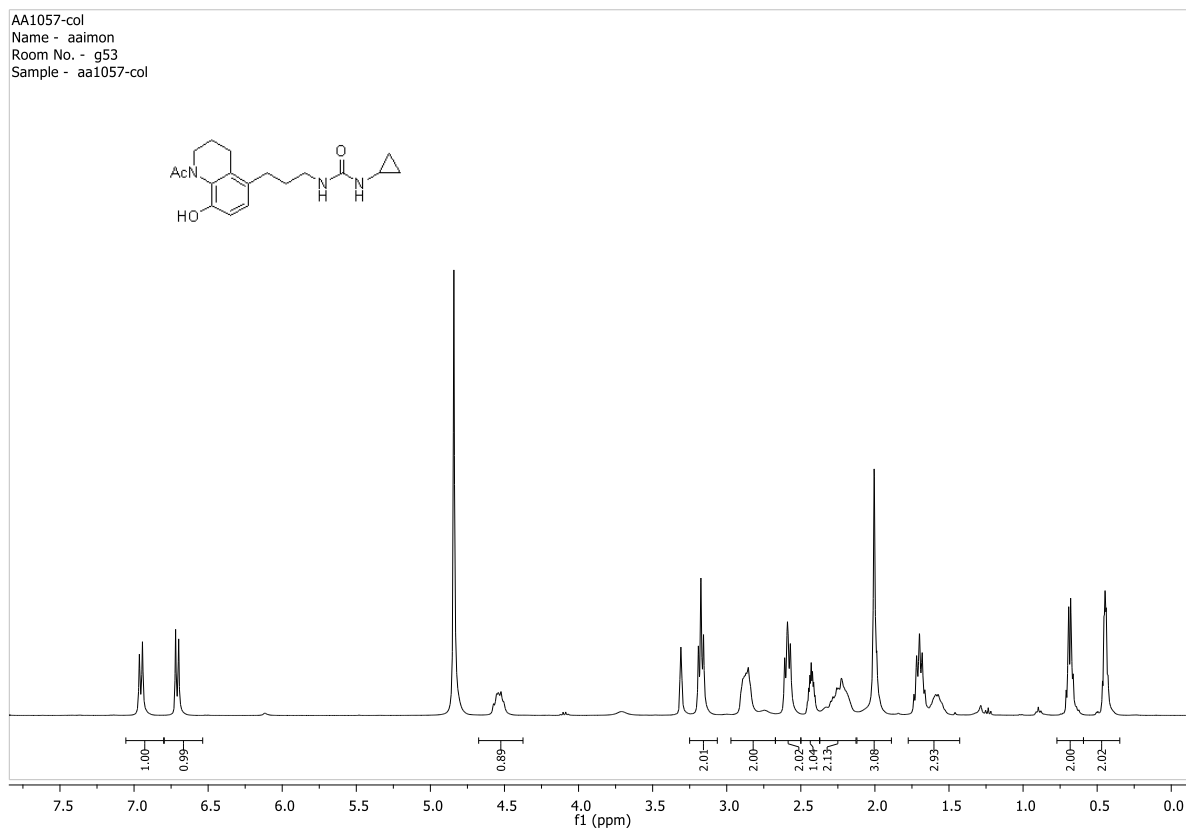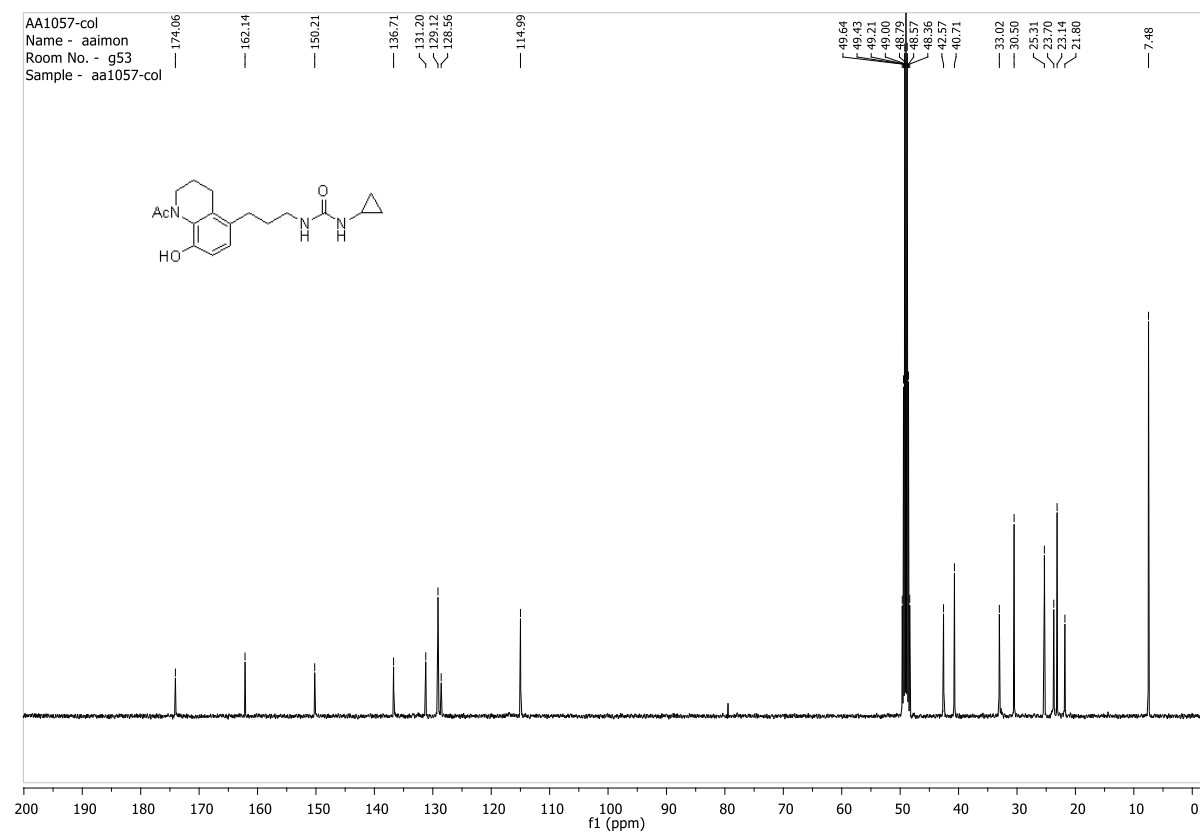

7-Benzyl-5,7-diaztricyclo[6.4.0.0<sup>1,5</sup>]dodec-11-ene-6,10-dione 2a

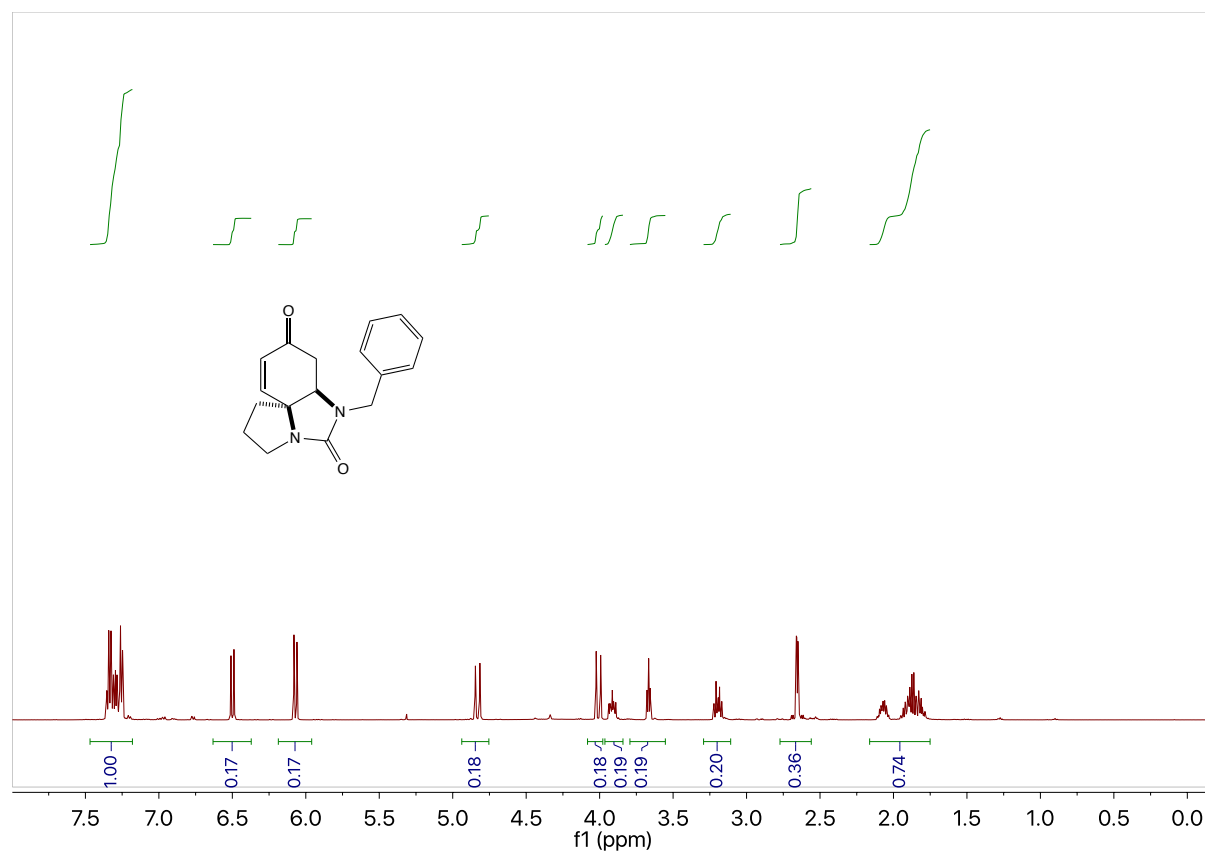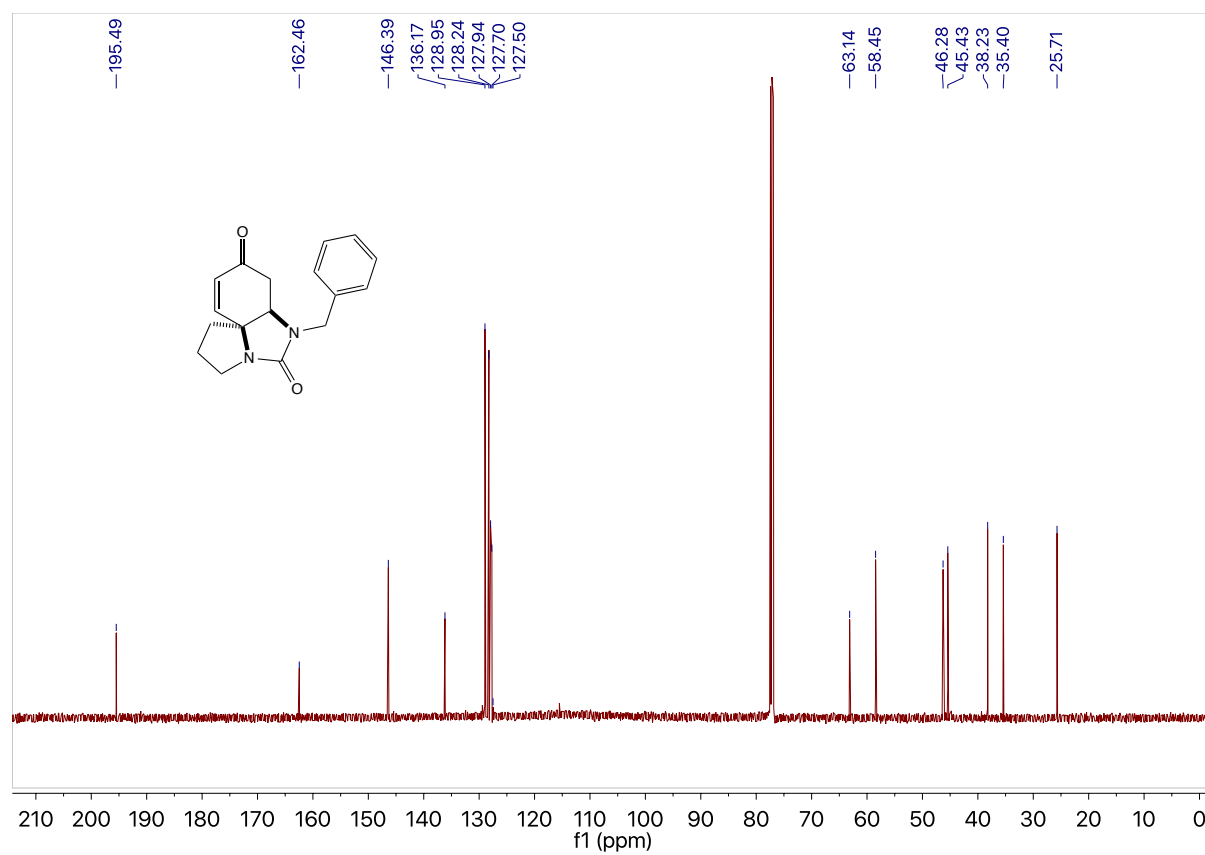

**7-Cyclopropyl-5,7-diaztricyclo[6.4.0.0<sup>1,5</sup>]dodec-11-ene-6,10-dione 2b**

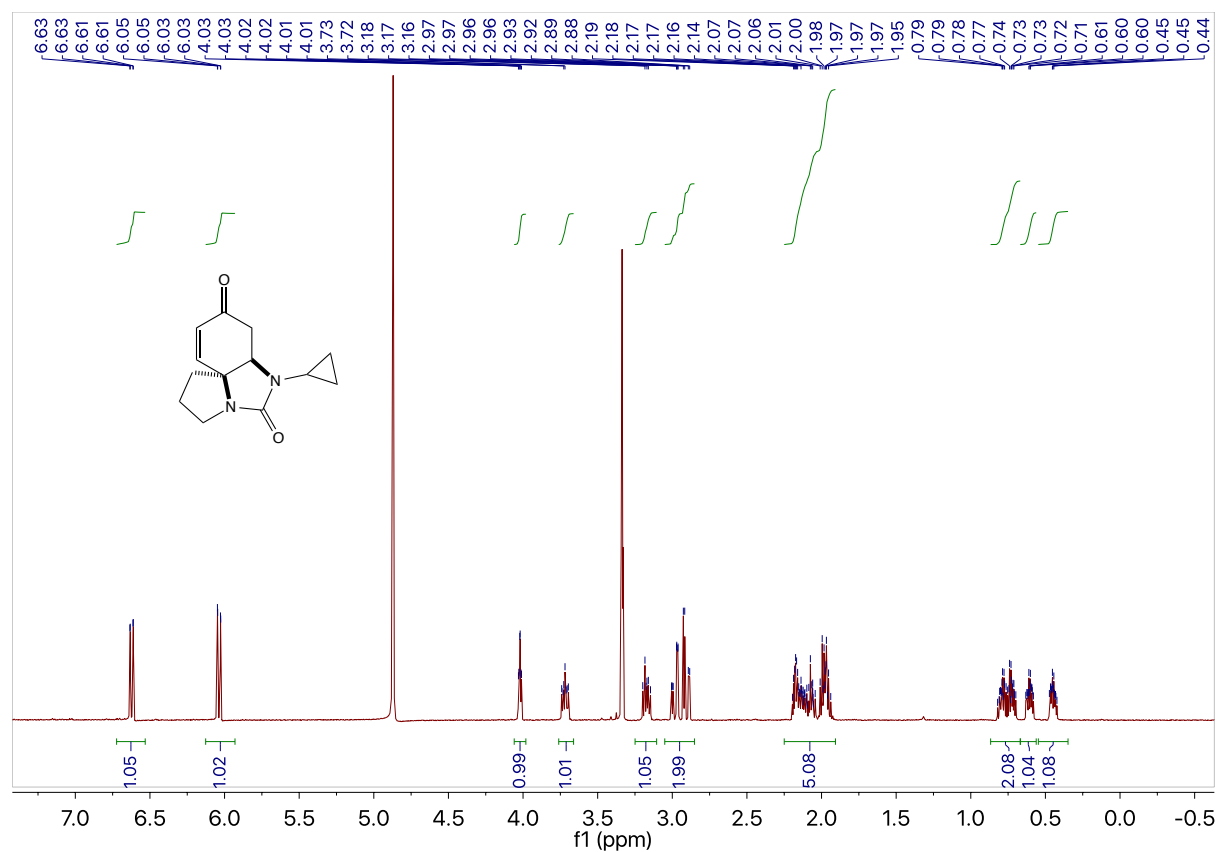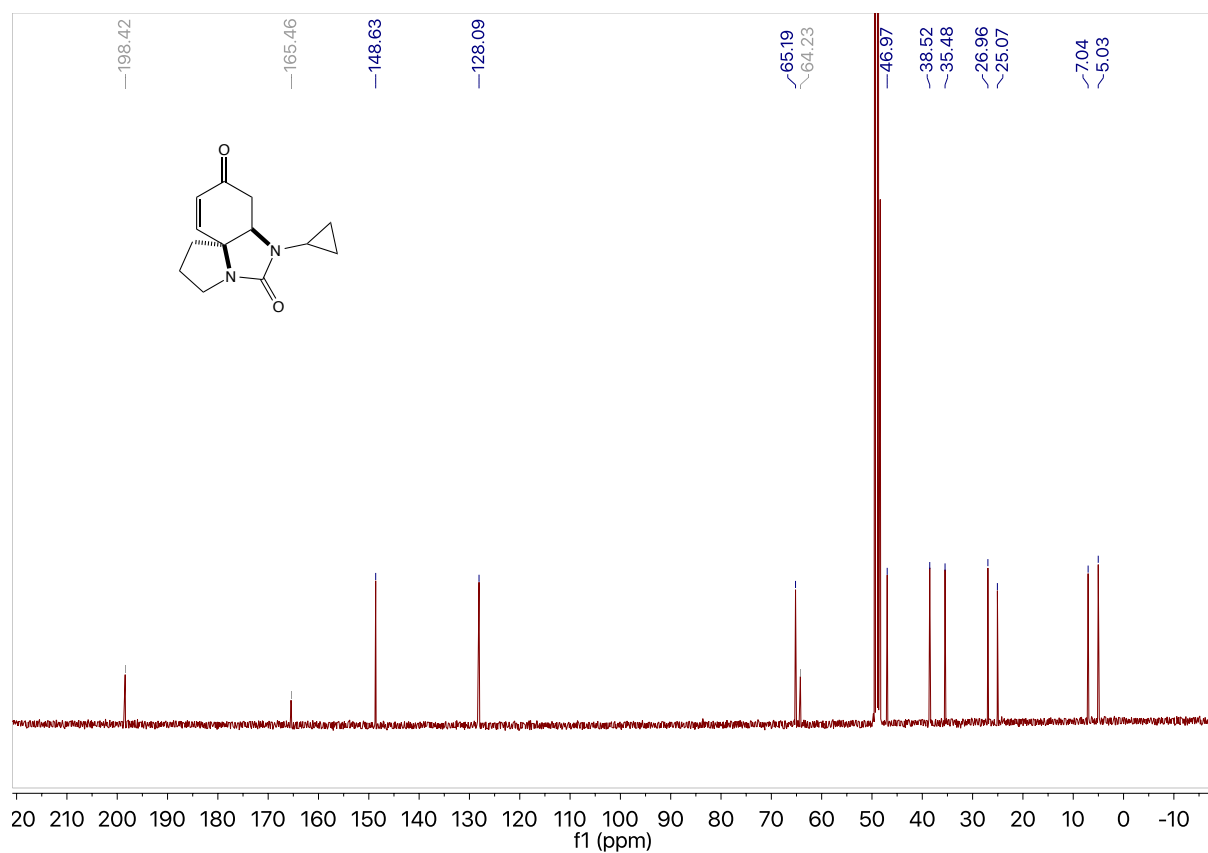

6-Isopropyl-2,3,6a,7-tetrahydro-1*H*,5*H*-benzo[*d*]pyrrolo[1,2-*c*]imidazole-5,8(6*H*)-dione 2c

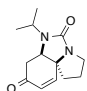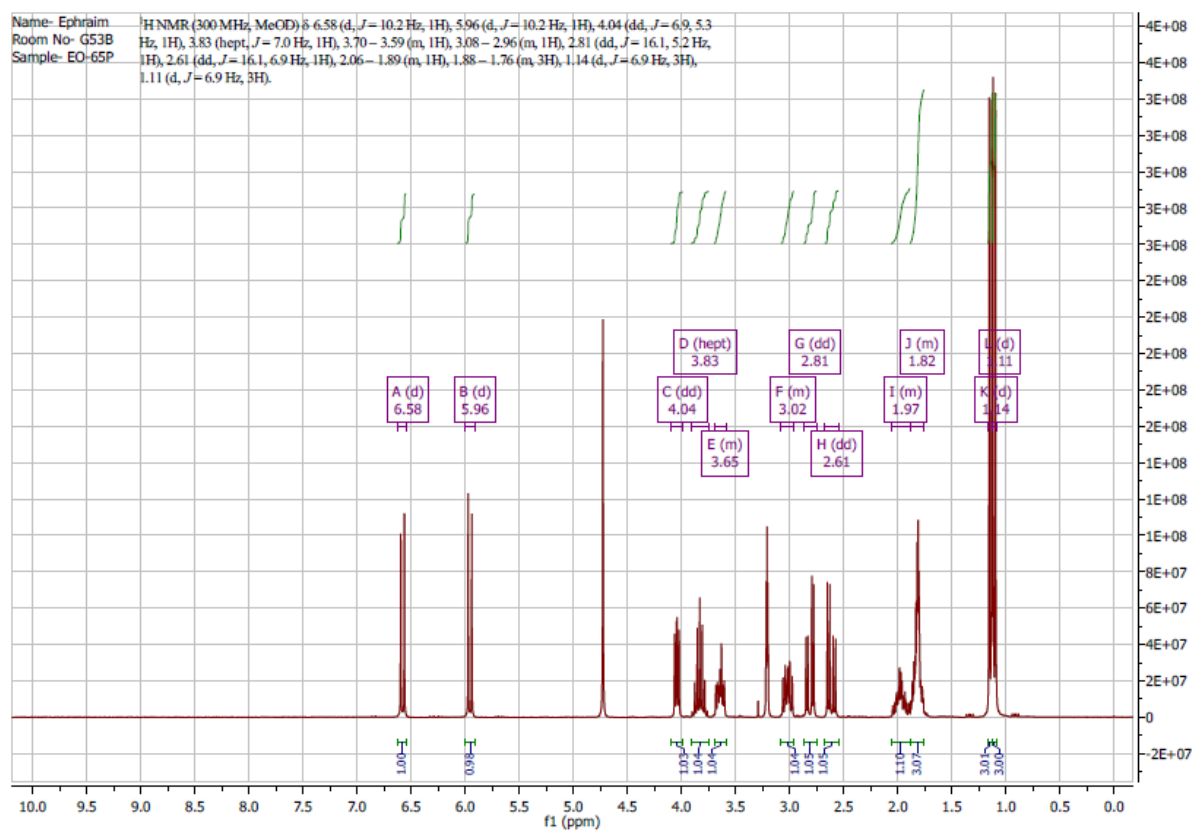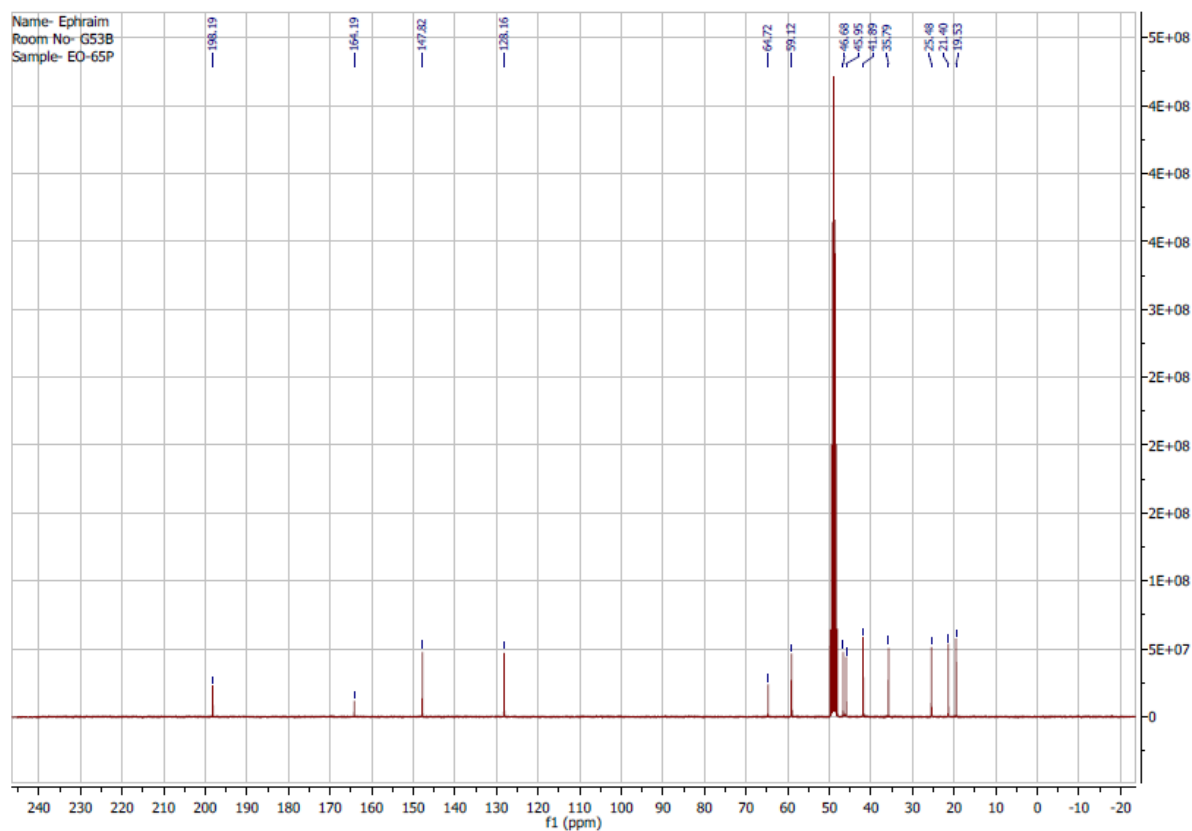

7-[2-Methoxyethyl]-5,7-diazatricyclo[6.4.0.0<sup>1,5</sup>]dodecane-6,10-dione 2d

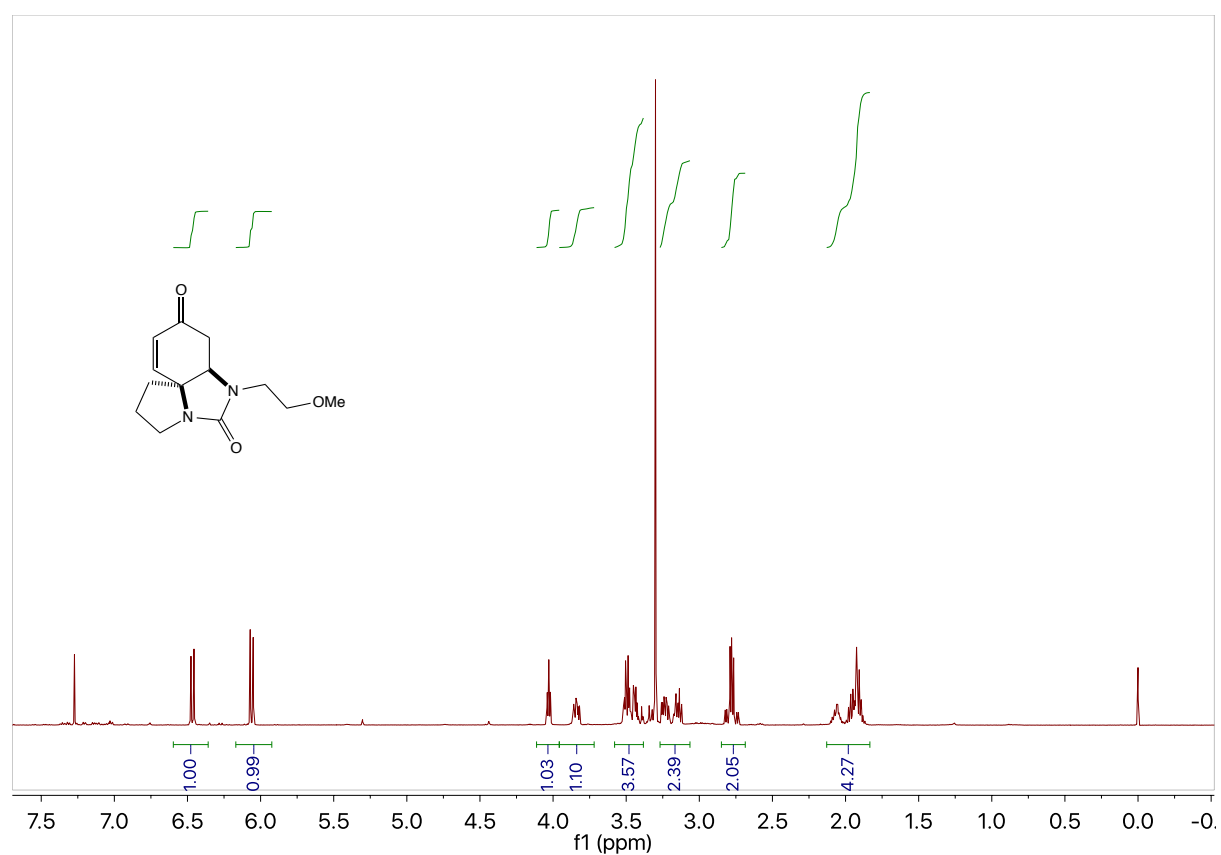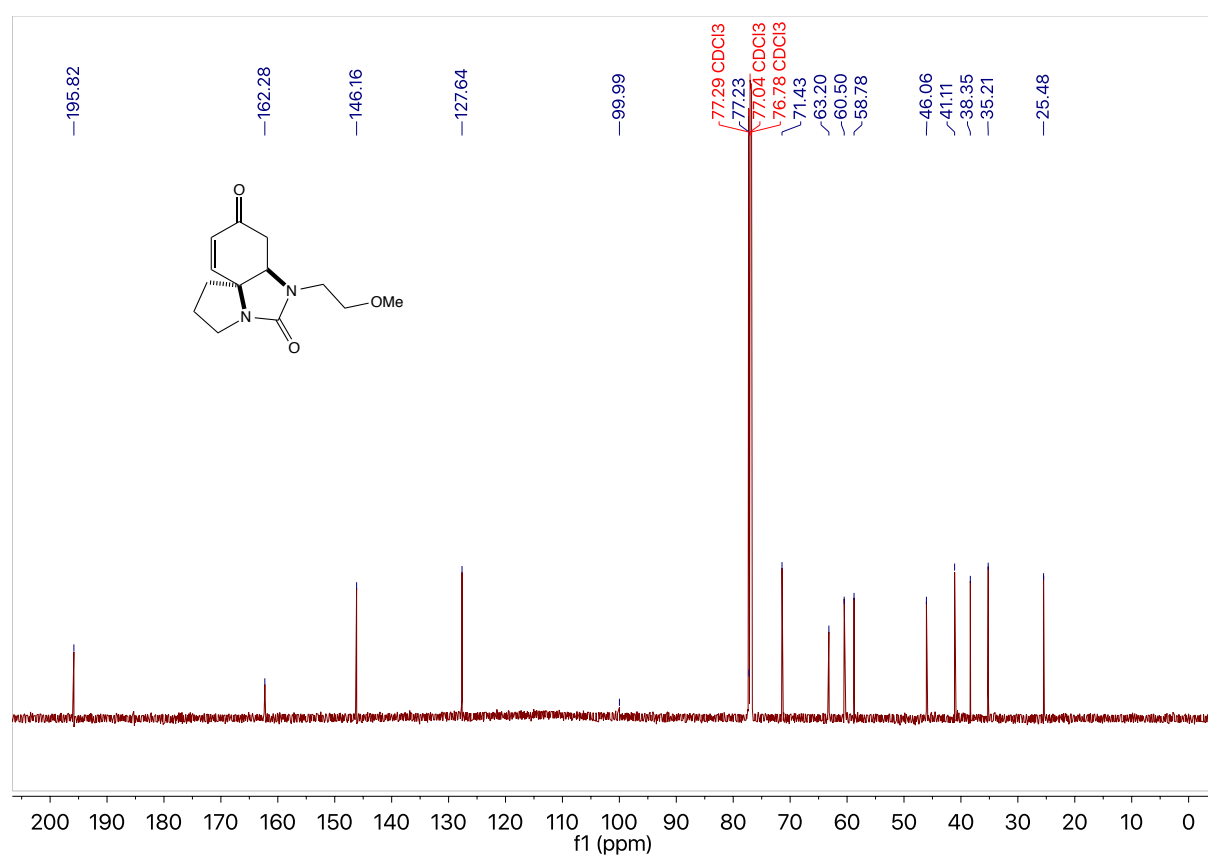

Ethyl 2-{6,10-dioxo-5,7-diazatricyclo[6.4.0.0<sup>1,5</sup>]dodec-11-en-7-yl}acetate 2e

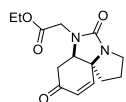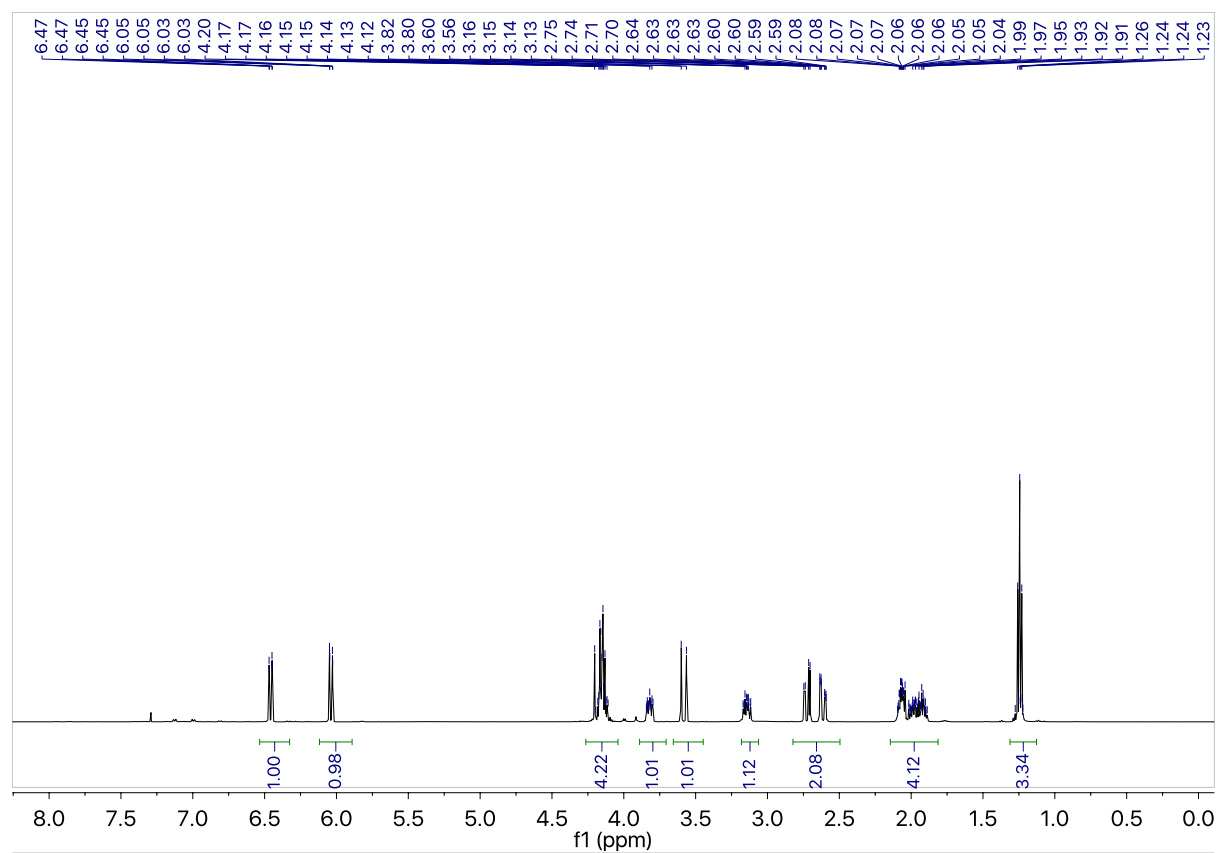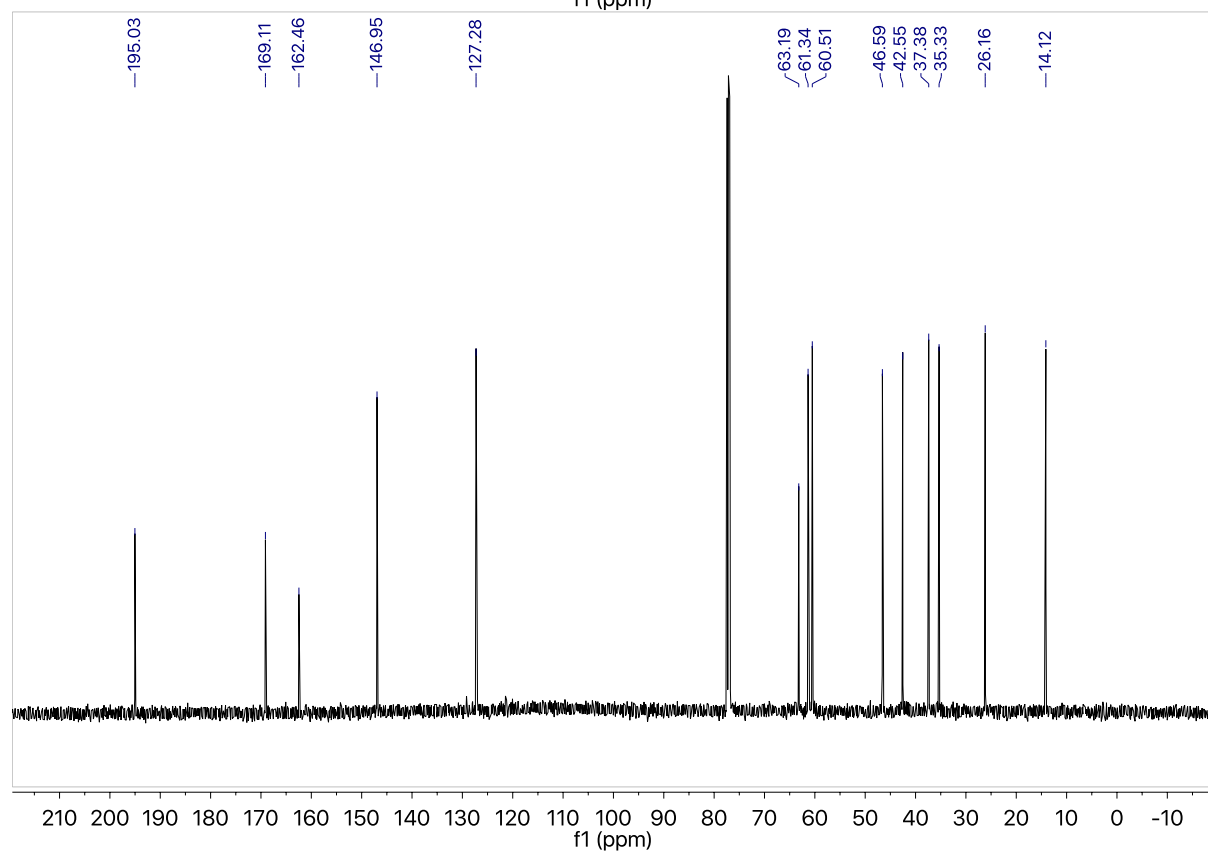

7-(4-Methylbenzenesulfonyl)-5,7-diazatricyclo[6.4.0.0<sup>1,5</sup>]dodec-11-ene-6,10-dione 2f

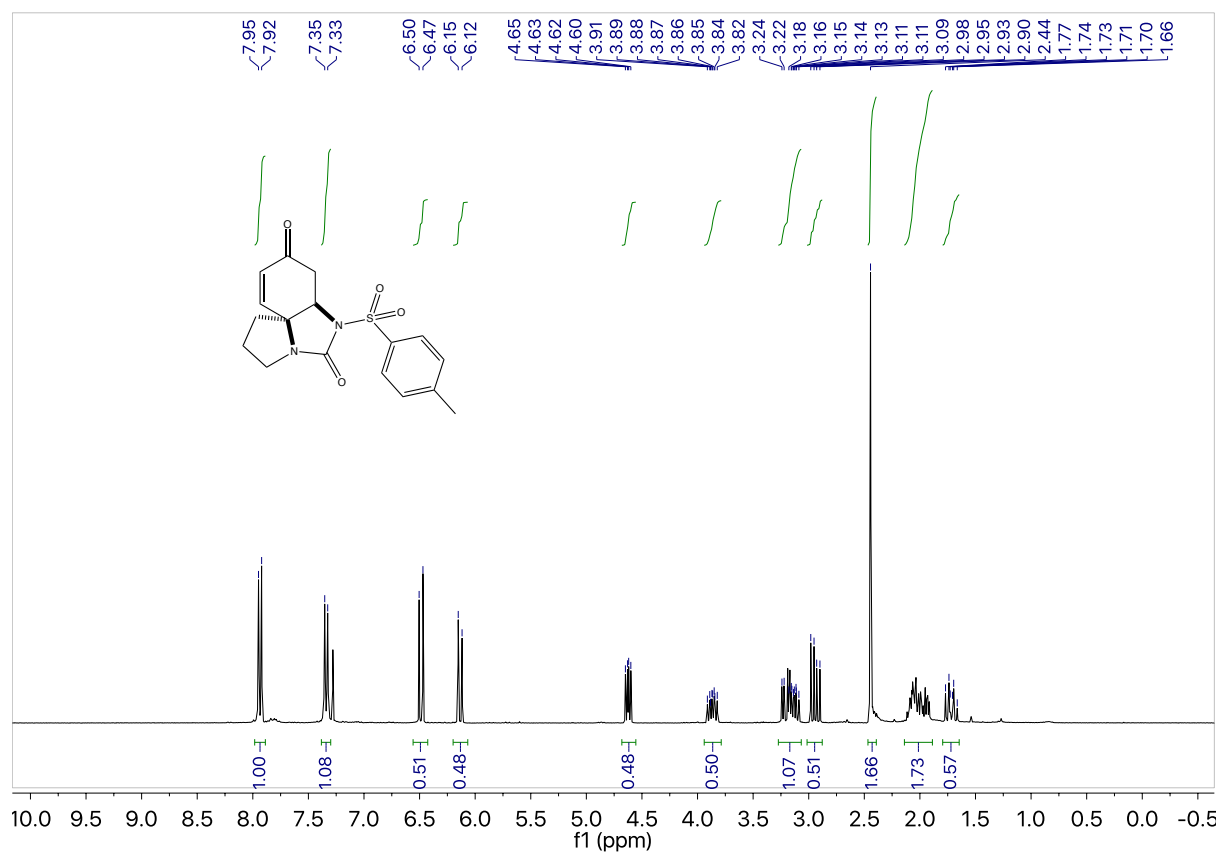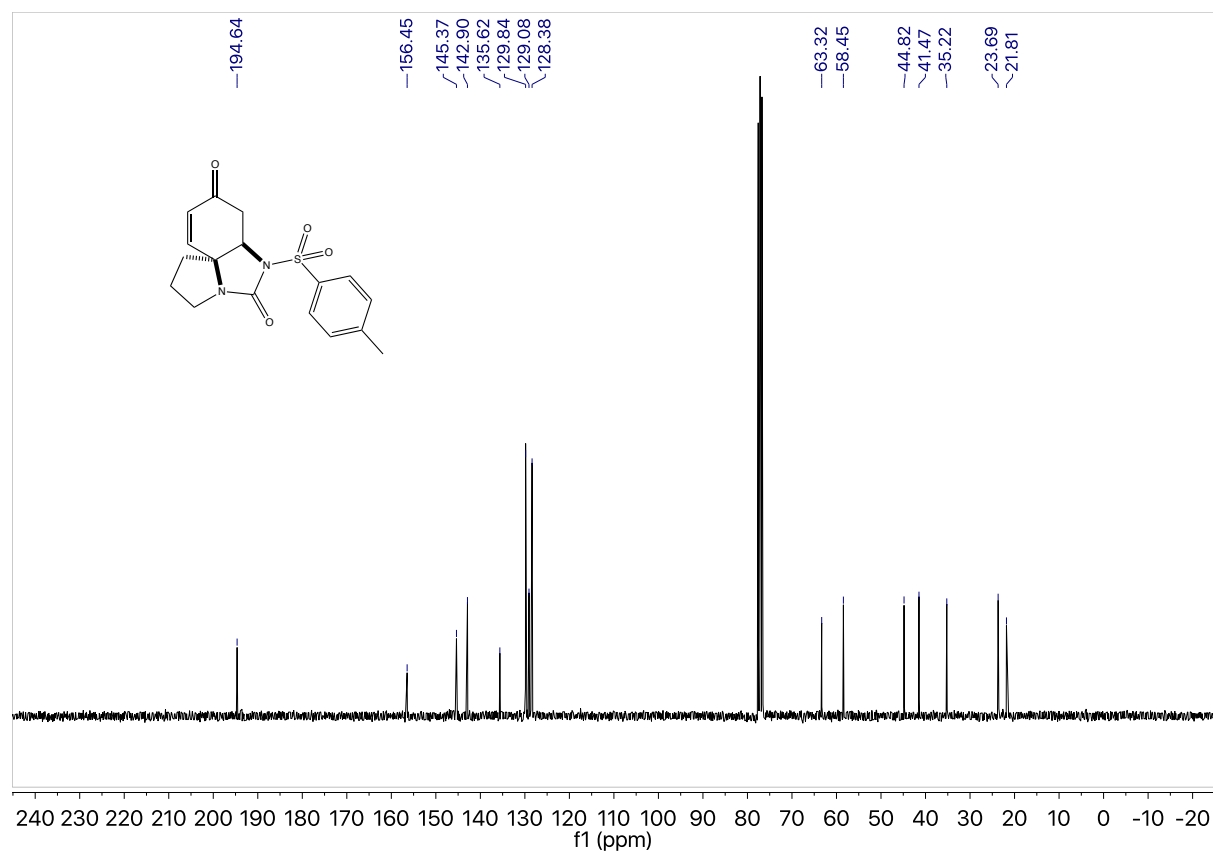

# 5,7-Diazatricyclo[6.4.0.0<sup>1,5</sup>]dodec-11-ene-6,10-dione 2g

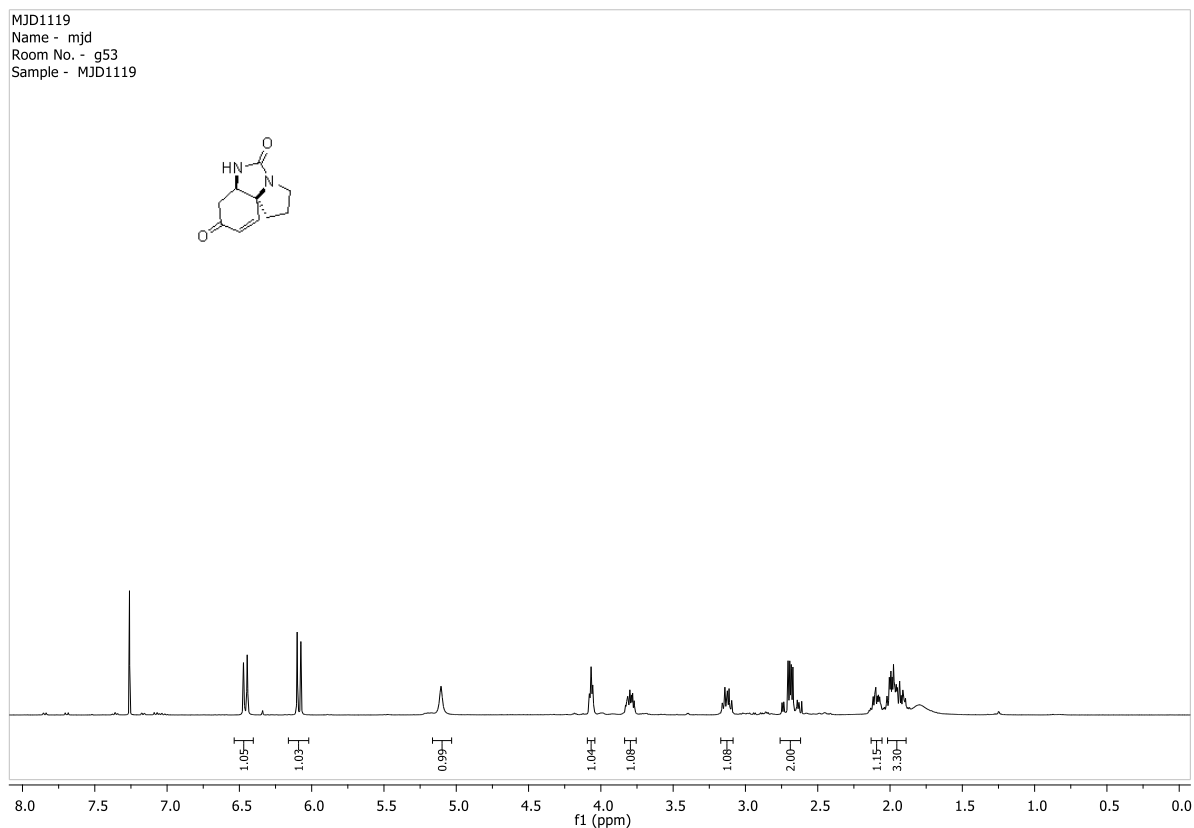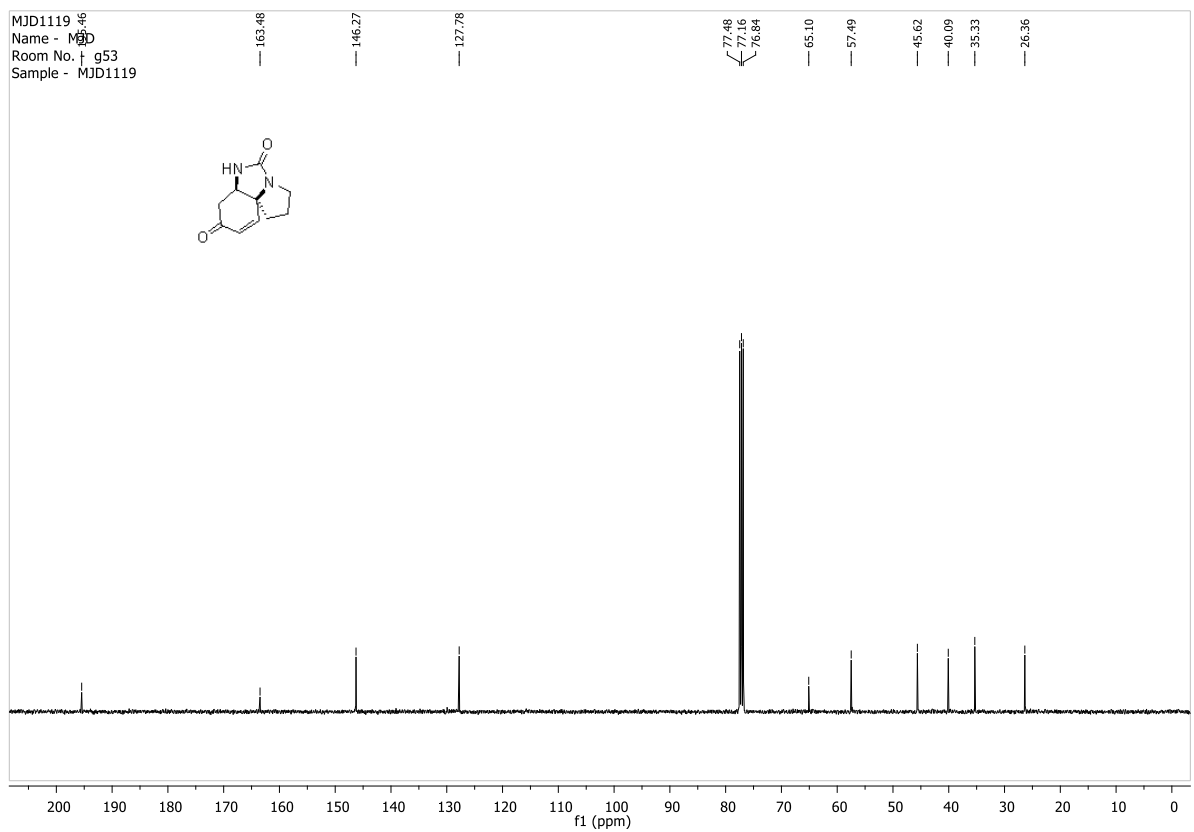



**7-(4-Chlorophenyl)-5,7-diazatricyclo[6.4.0.0<sup>1,5</sup>]dodec-11-ene-6,10-dione 2h**

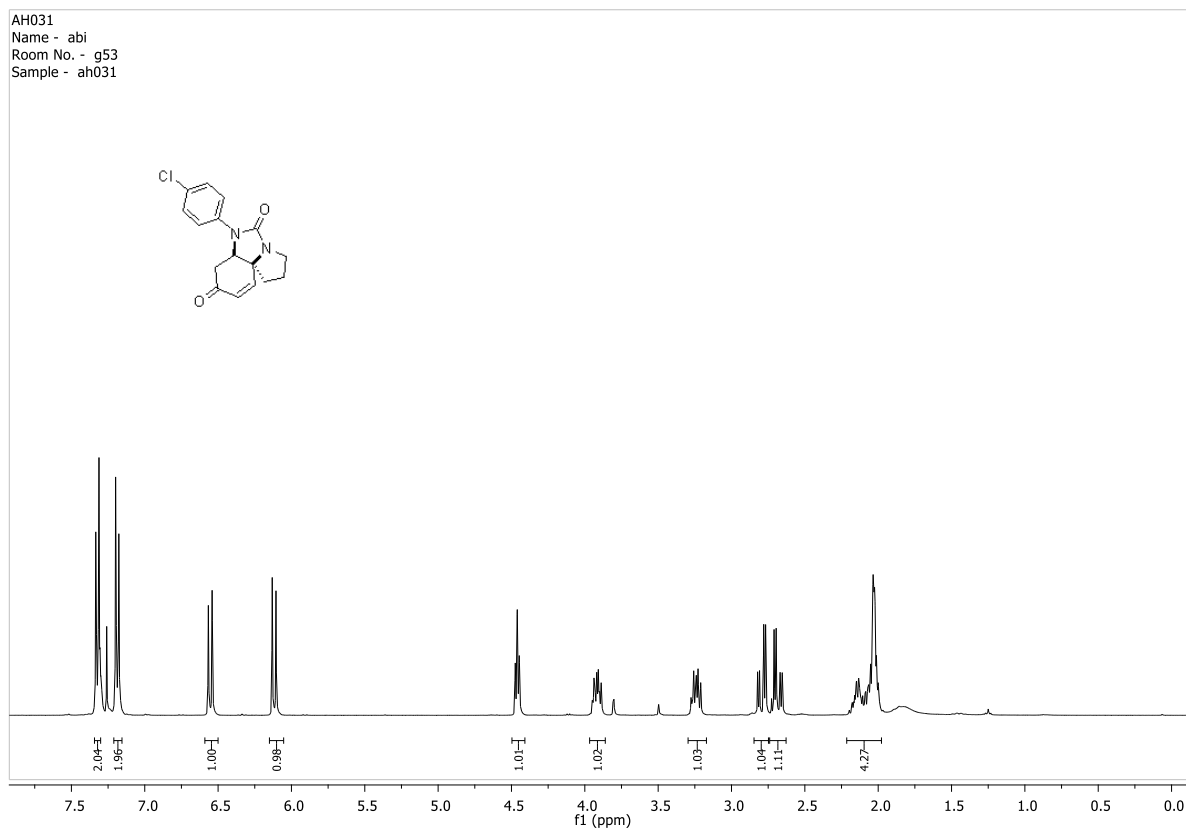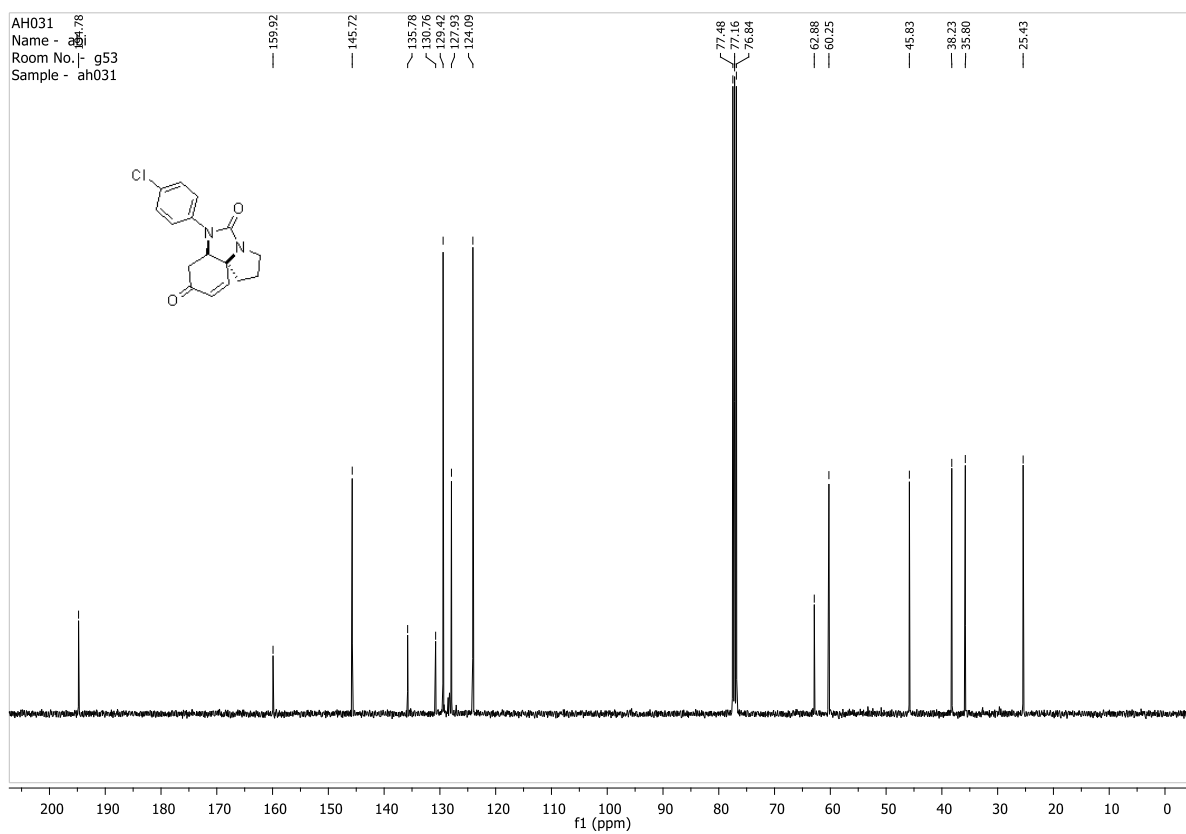

**6-(4-Methoxyphenyl)-2,3,6a,7-tetrahydro-1H,5H-benzo[d]pyrrolo[1,2-c]imidazole-5,8(6H)-dione 2i**

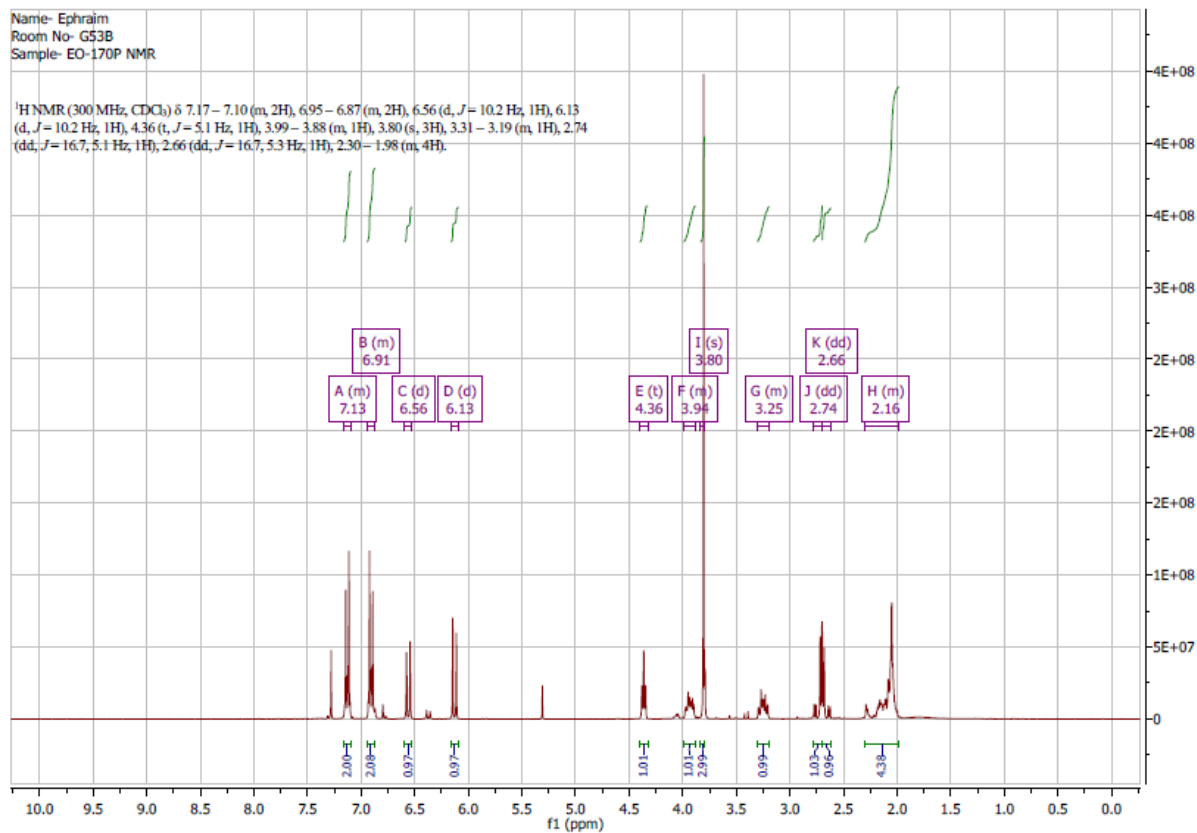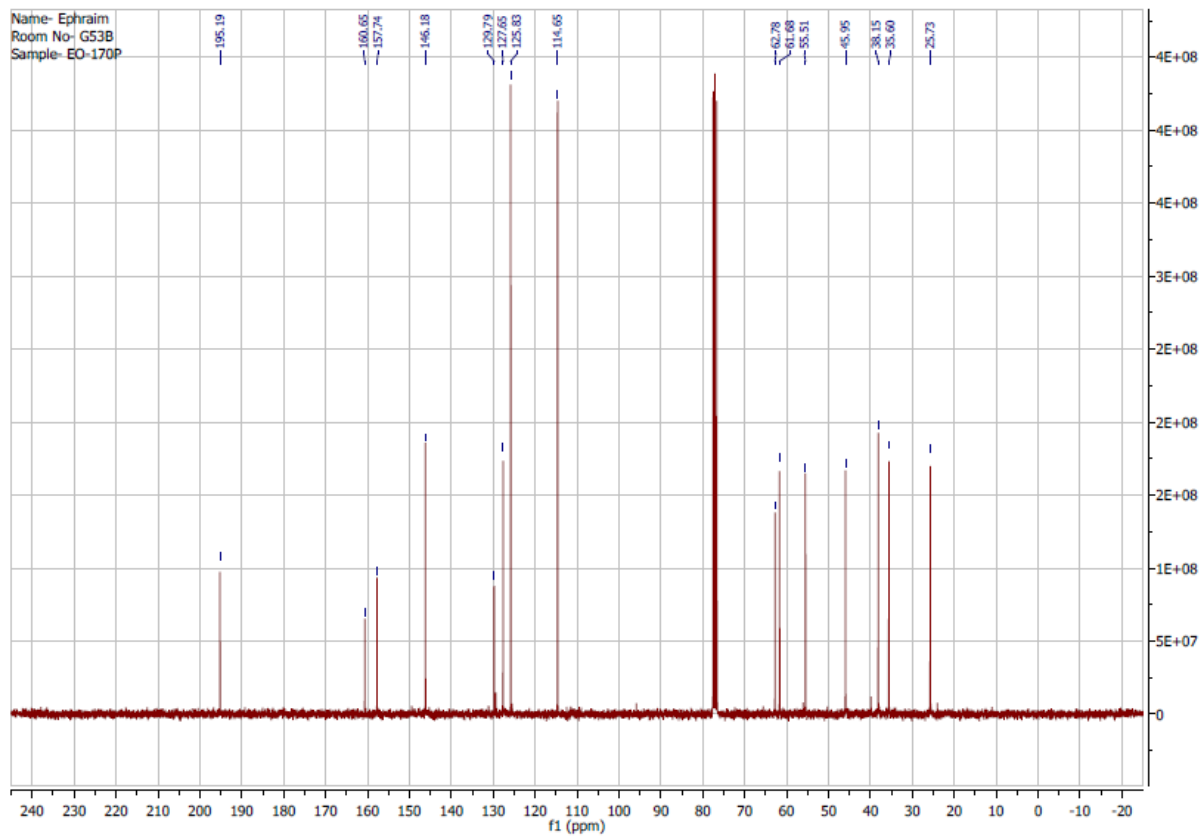

7-[4-(Trifluoromethyl)phenyl]-5,7-diaztricyclo[6.4.0.0<sup>1,5</sup>]dodec-11-ene-6,10-dione 2J =

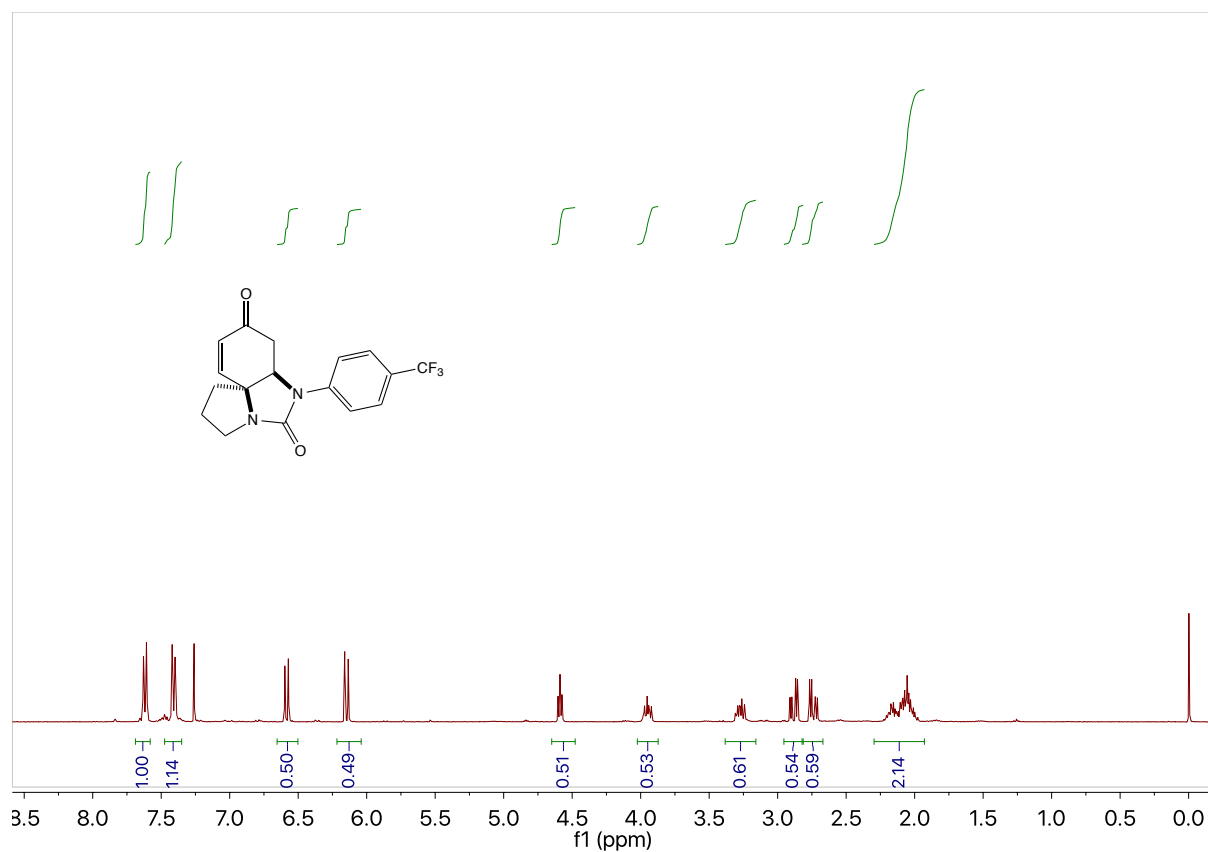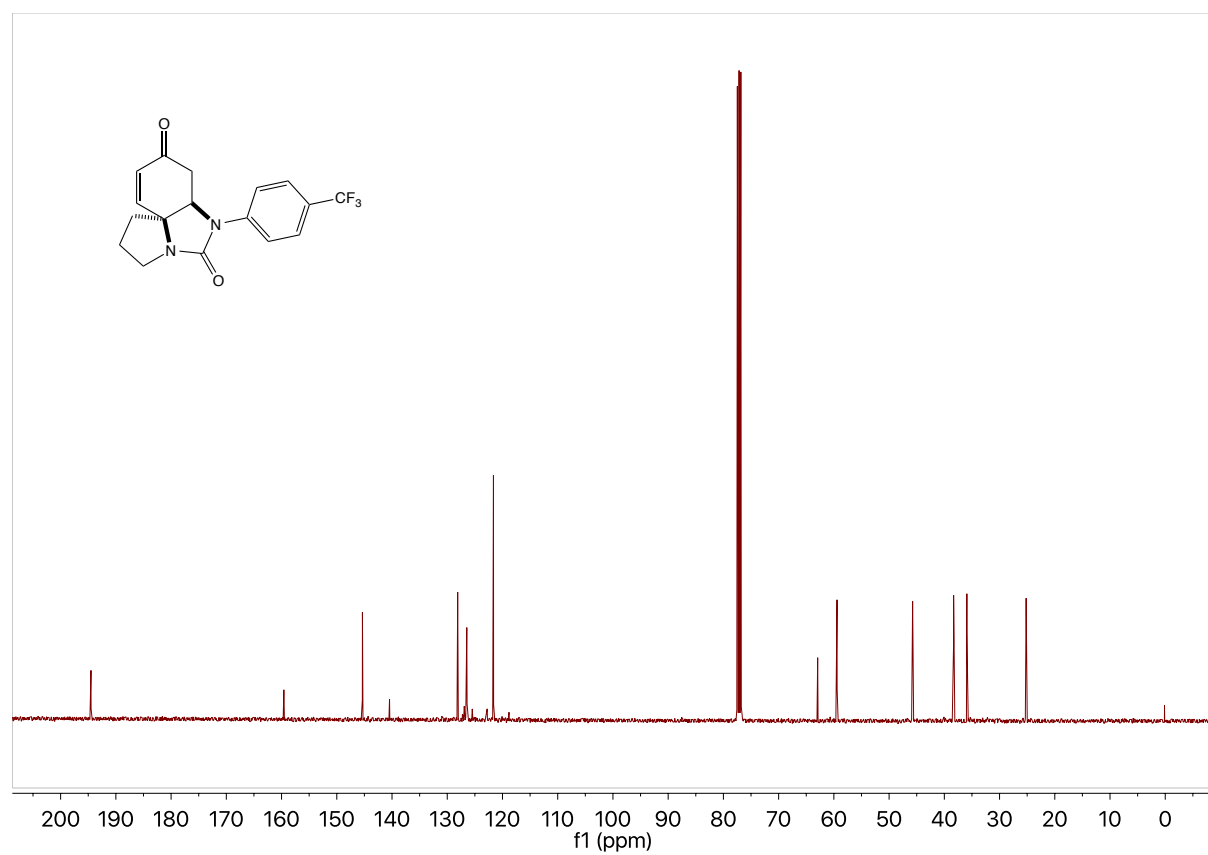

7-Benzyl-11-methoxy-5,7-diazatricyclo[6.4.0.0<sup>1,5</sup>]dodec-11-ene-6,10-dione 2k

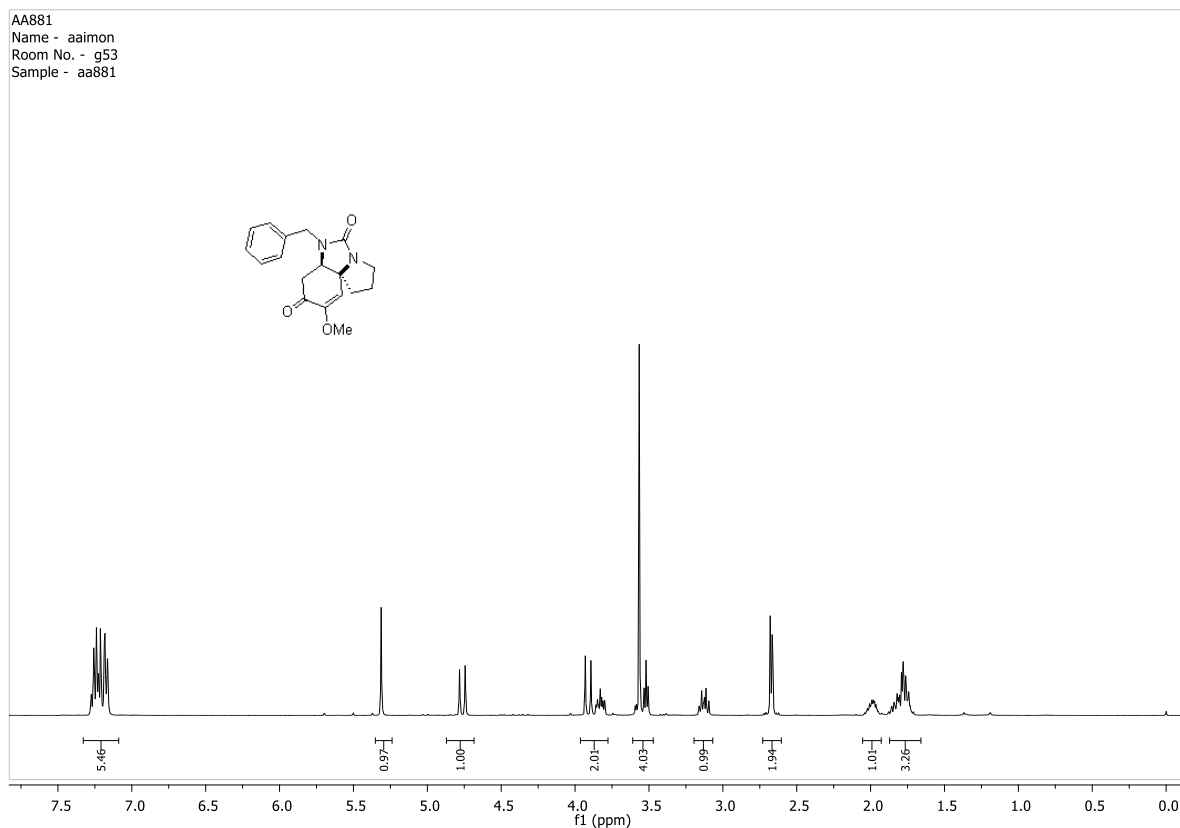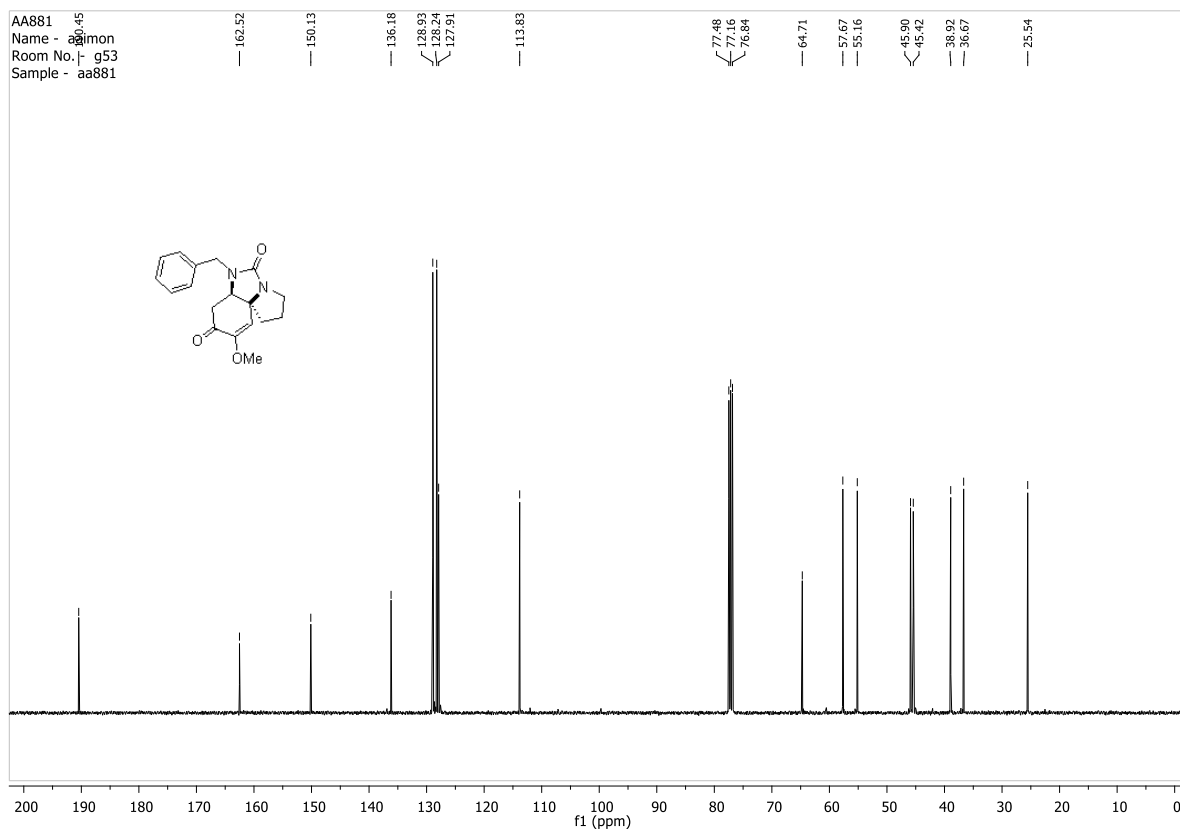

**Ethyl 2-{11-methoxy-6,10-dioxo-5,7-diazatricyclo[6.4.0.0<sup>1,5</sup>]dodec-11-en-7-yl}acetate 2I**

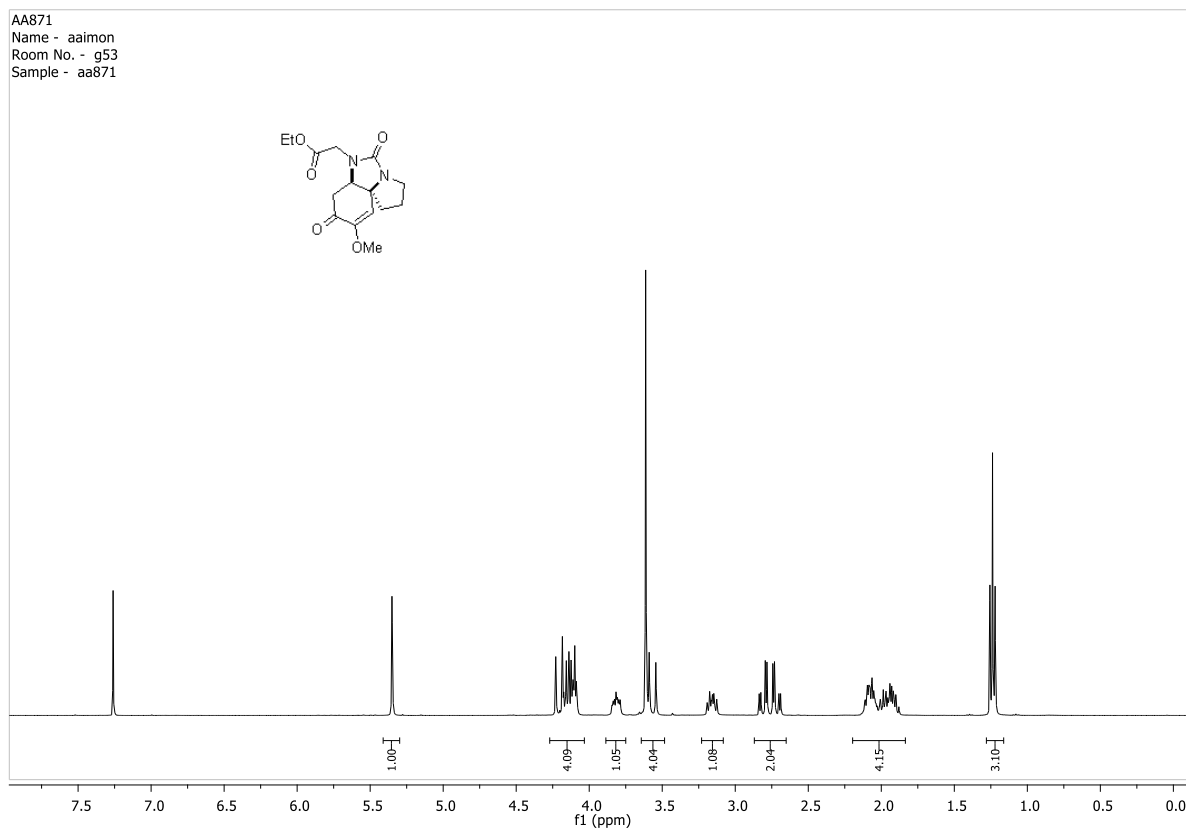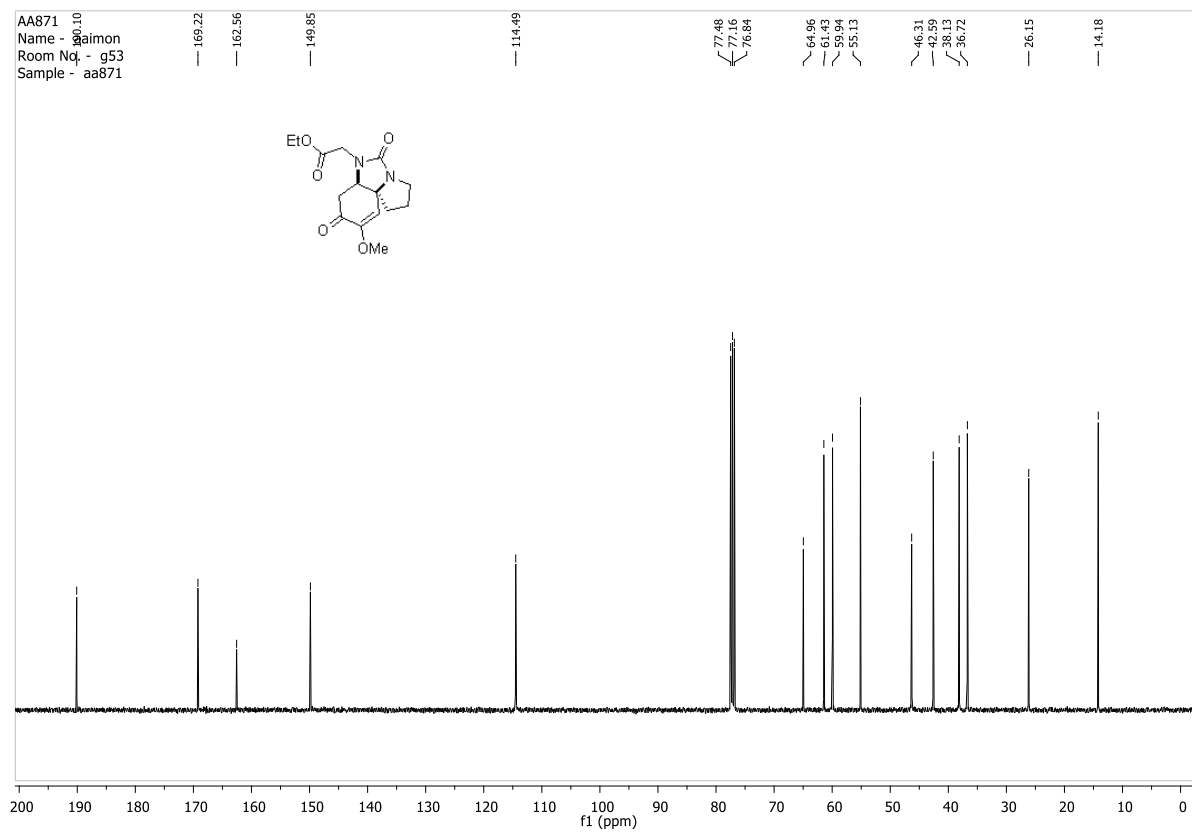

**11-Methoxy-7-(4-methylbenzenesulfonyl)-5,7-diazatricyclo[6.4.0.0<sup>1,5</sup>]dodec-11-ene-6,10-dione 2m**

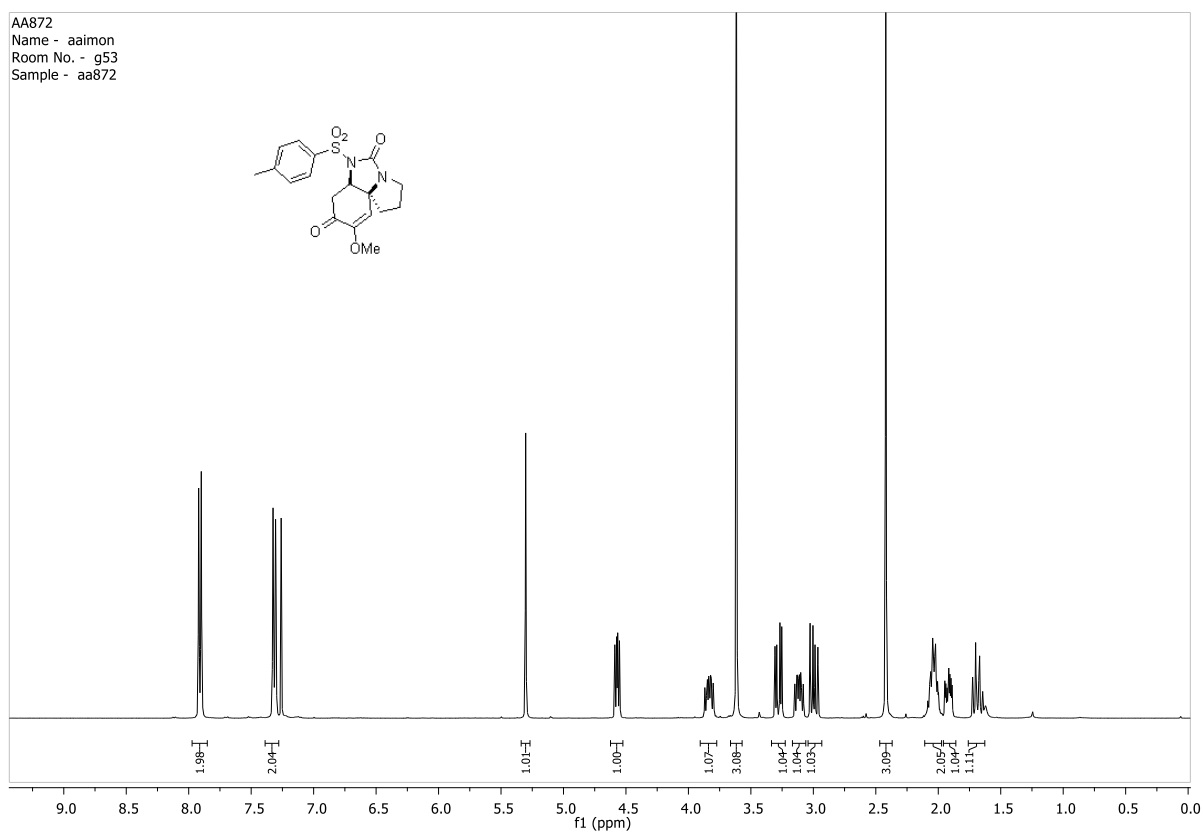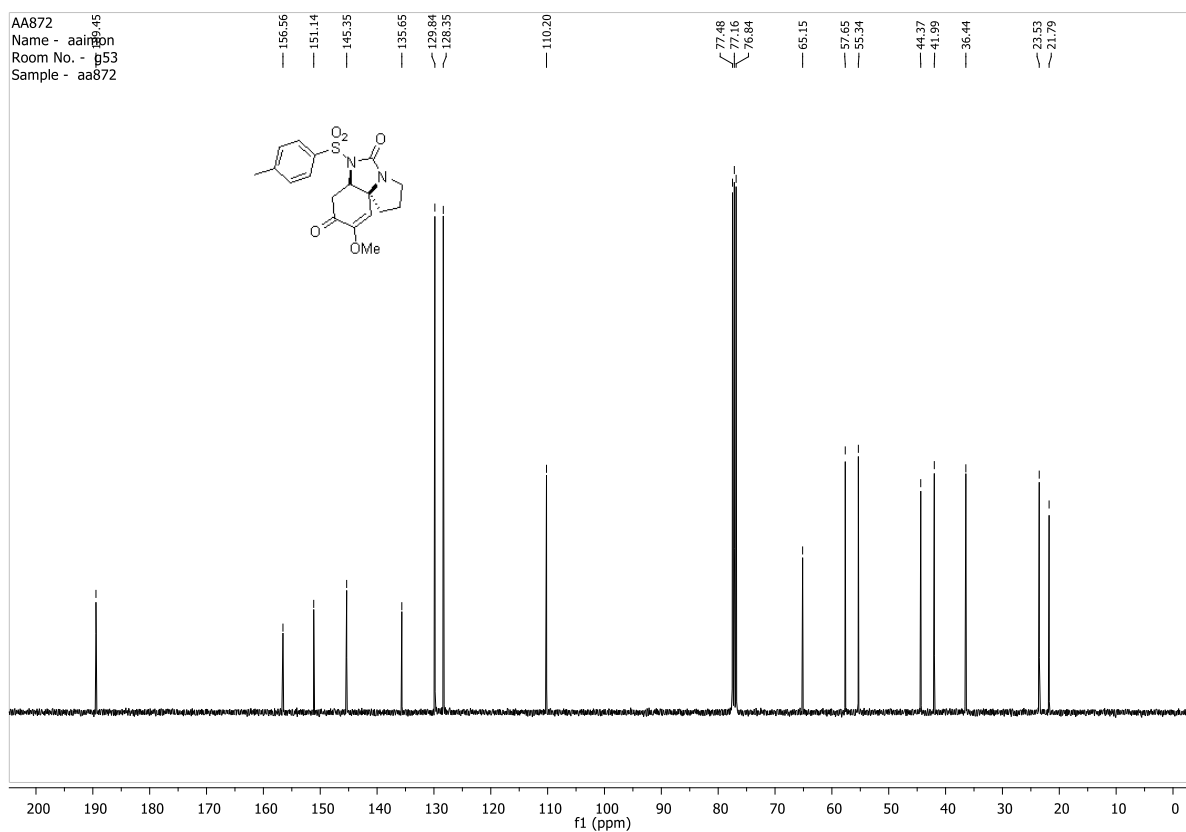

**7-(4-Chlorophenyl)-11-methoxy-5,7-diazatricyclo[6.4.0.0<sup>1,5</sup>]dodec-11-ene-6,10-dione 2n**

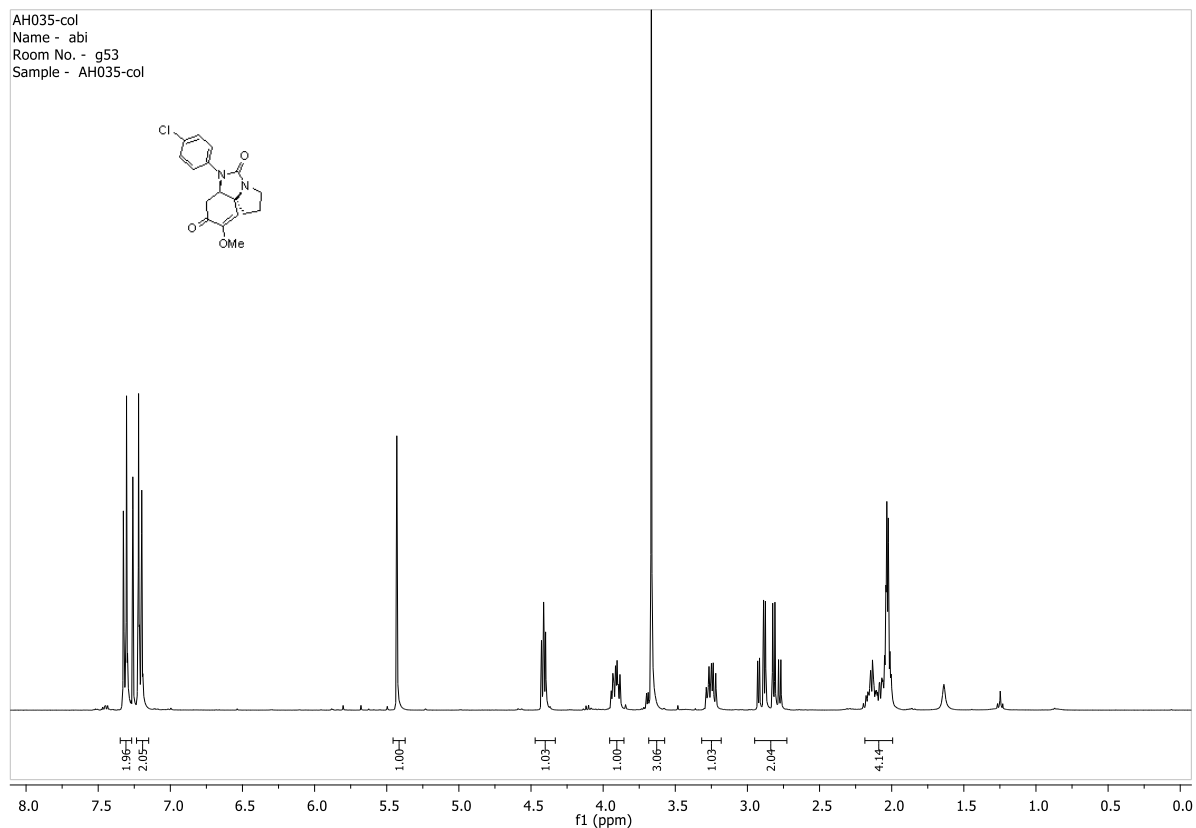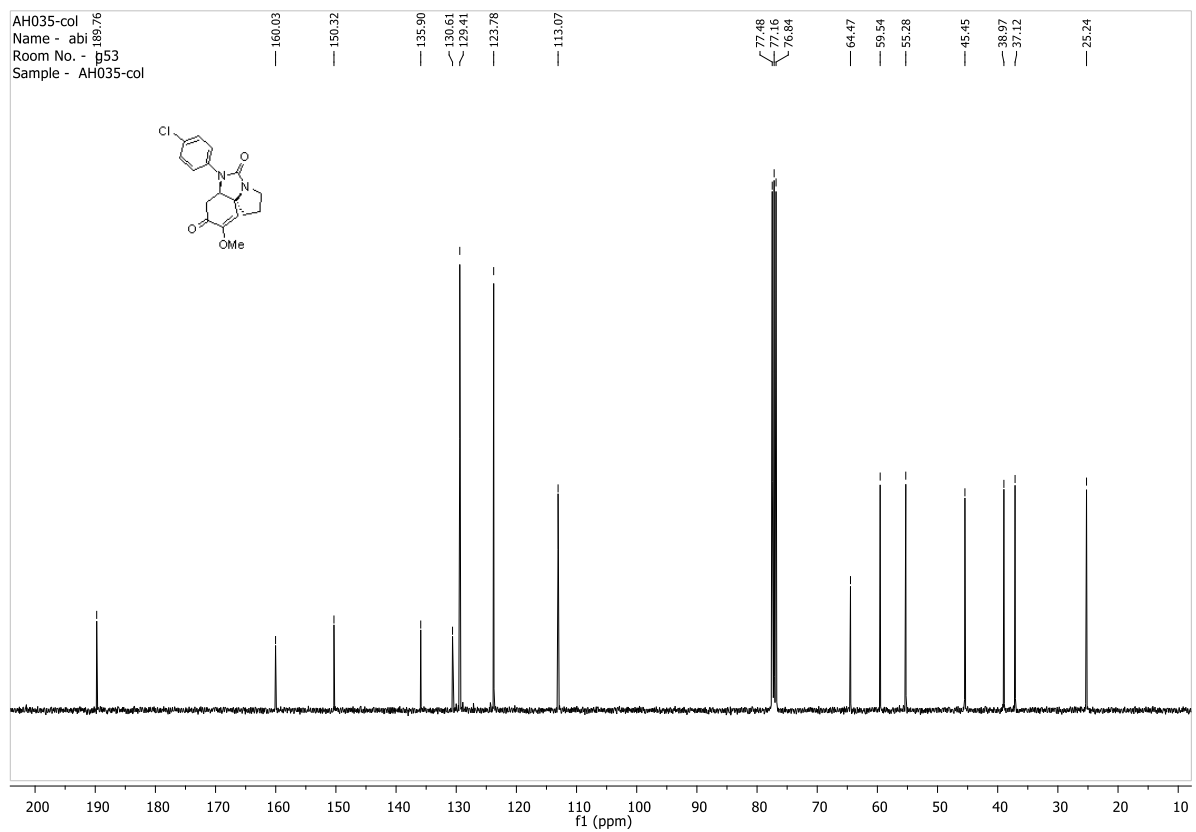

**11-Cyclopropyl-11,13-diazatetracyclo[8.6.0.0<sup>1,13</sup>.0<sup>2,7</sup>]hexadeca-2(7),3,5-triene-8,12-dione**  
**2o**

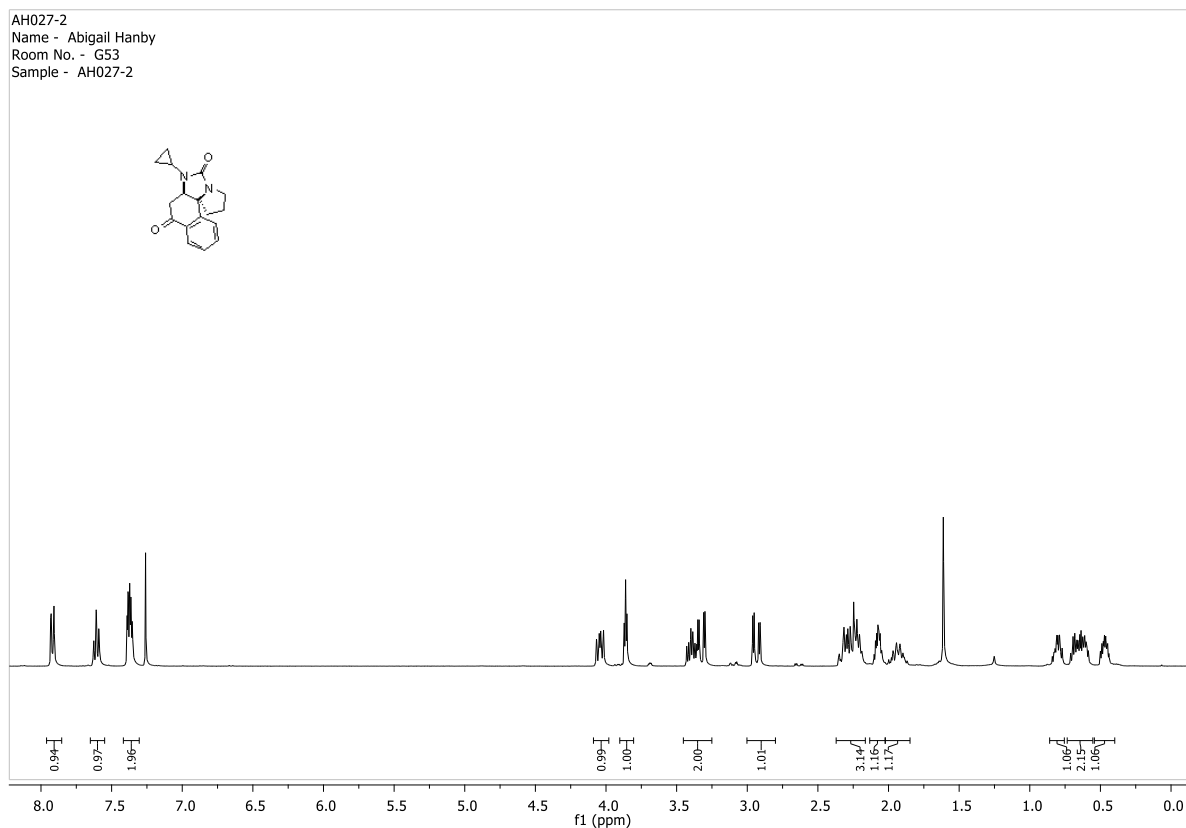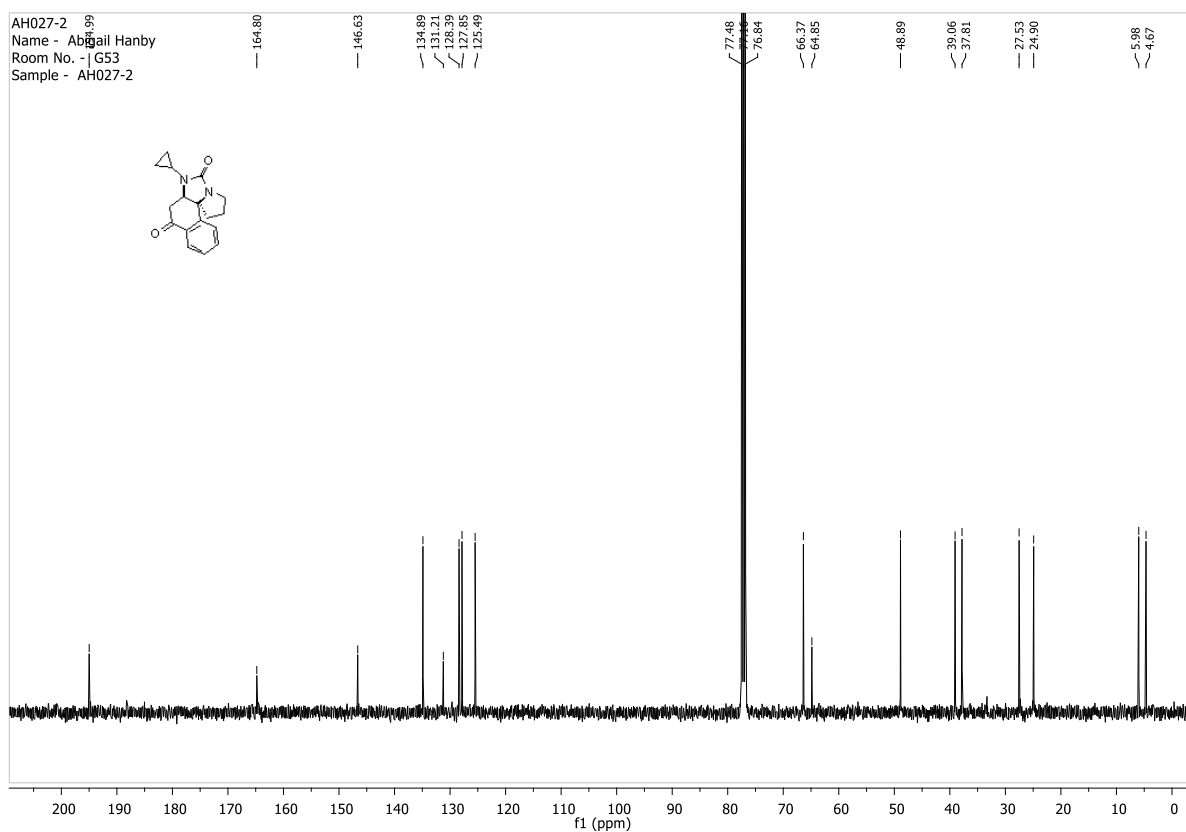



**Ethyl 2-{8,12-dioxo-11,13-diazatetracyclo[8.6.0.0<sup>1,13</sup>.0<sup>2,7</sup>]hexadeca-2(7),3,5-trien-11-yl}acetate 2p**

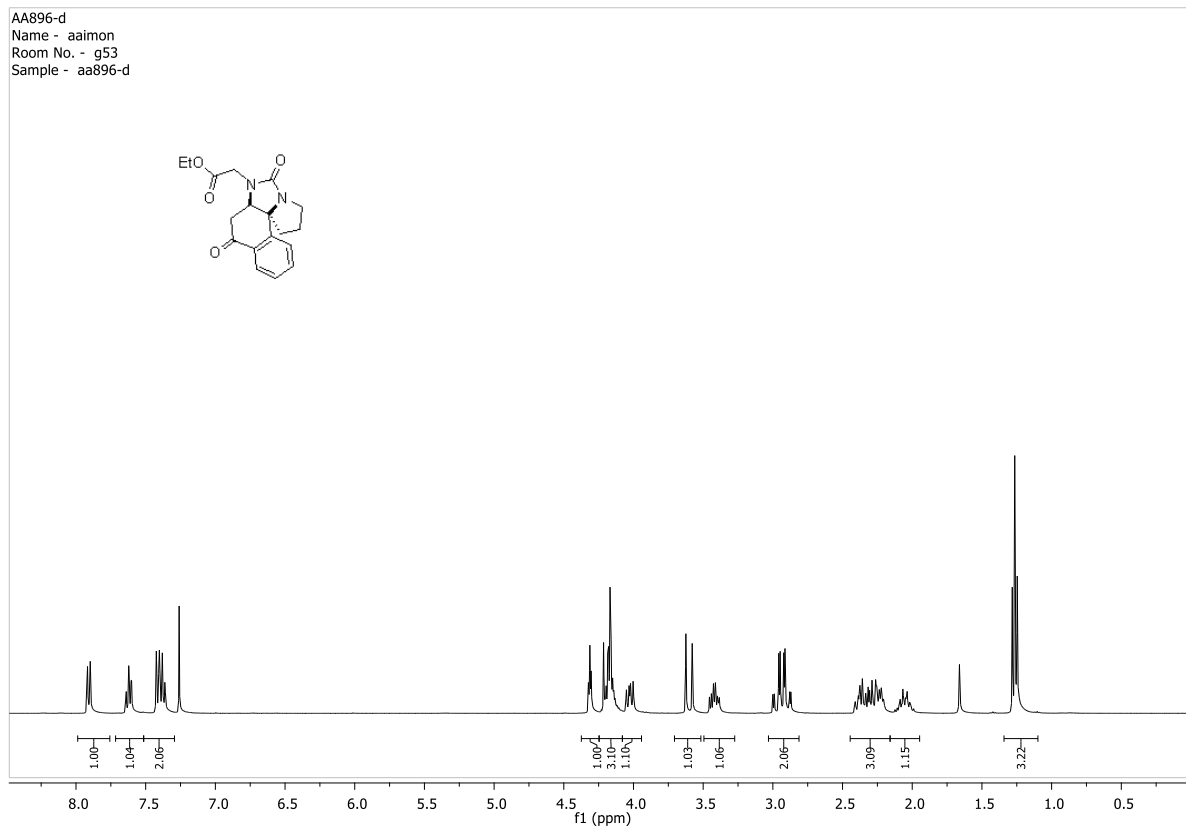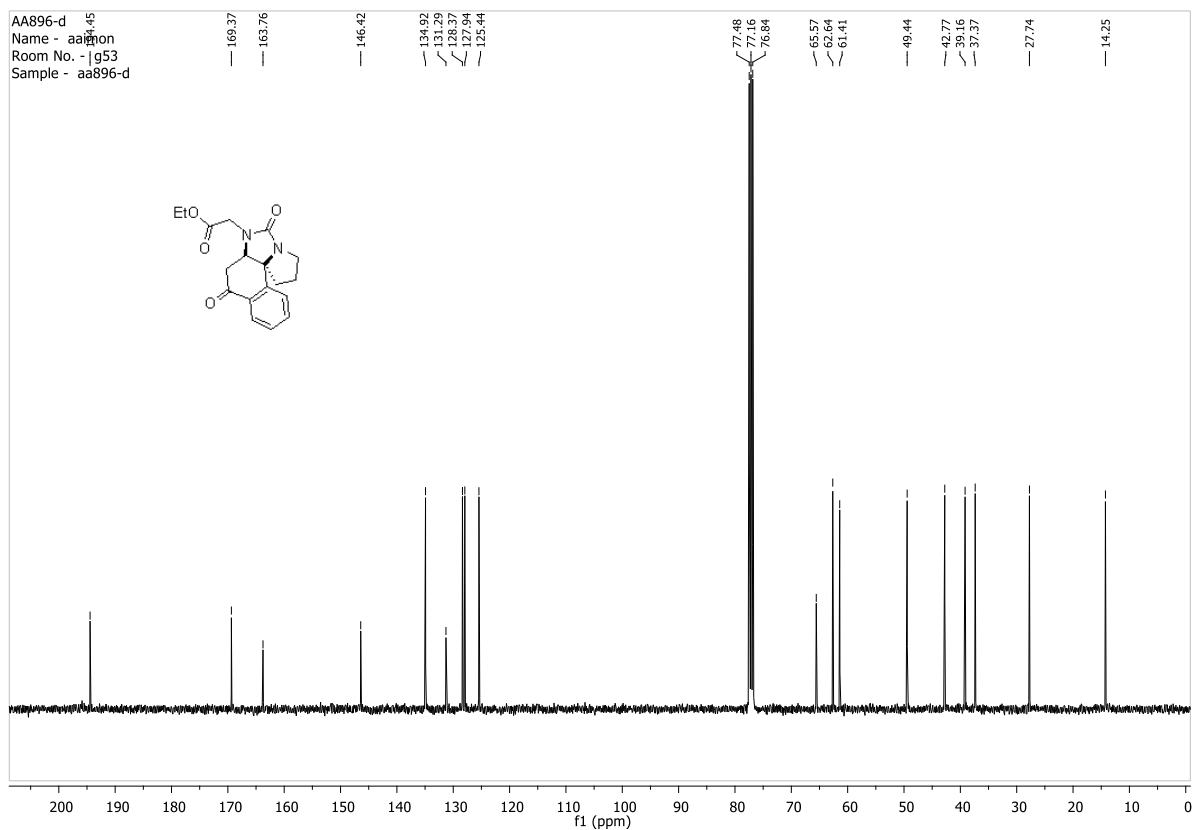

**11-(4-Chlorophenyl)-11,13-diazatetracyclo[8.6.0.0<sup>1,13</sup>.0<sup>2,7</sup>]hexadeca-2(7),3,5-triene-8,12-dione 2q**

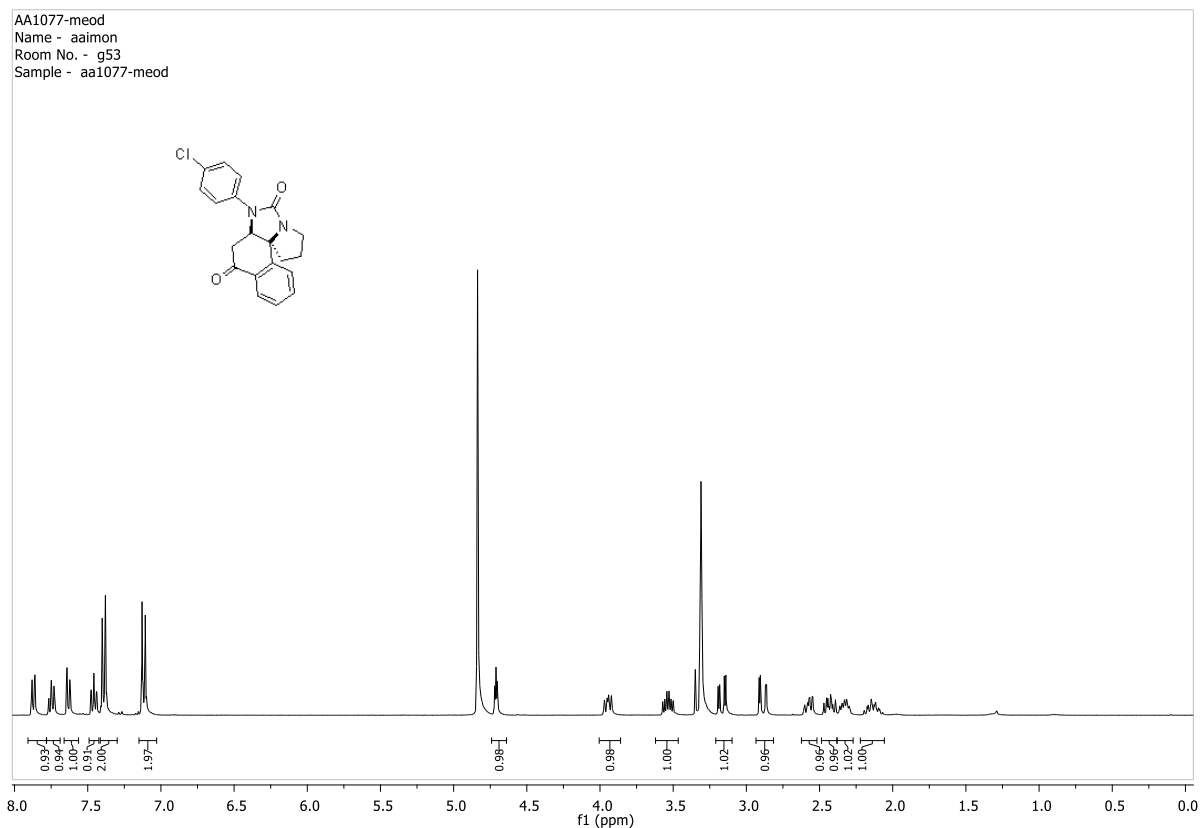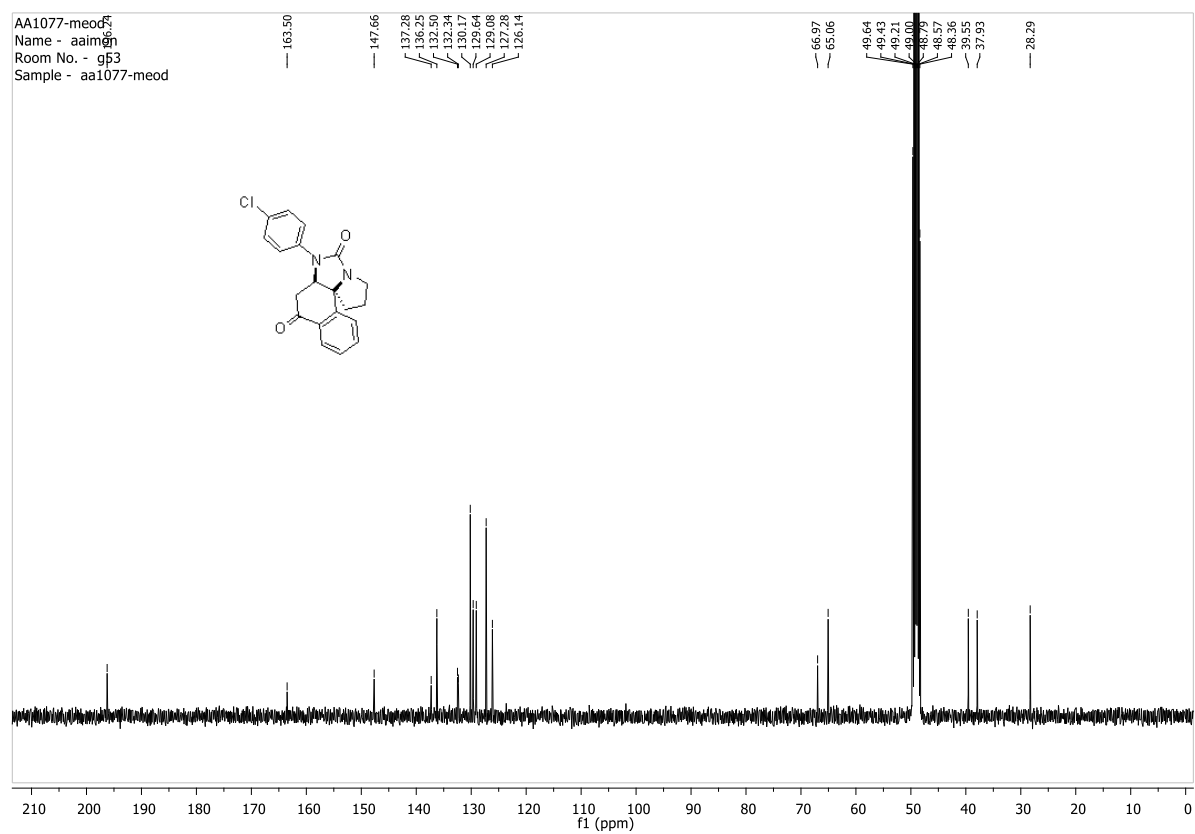

**11-(4-Methylbenzenesulfonyl)-11,13-diazatetracyclo[8.6.0.0<sup>1,13</sup>.0<sup>2,7</sup>]hexadeca-2(7),3,5-triene-8,12-dione 2r**

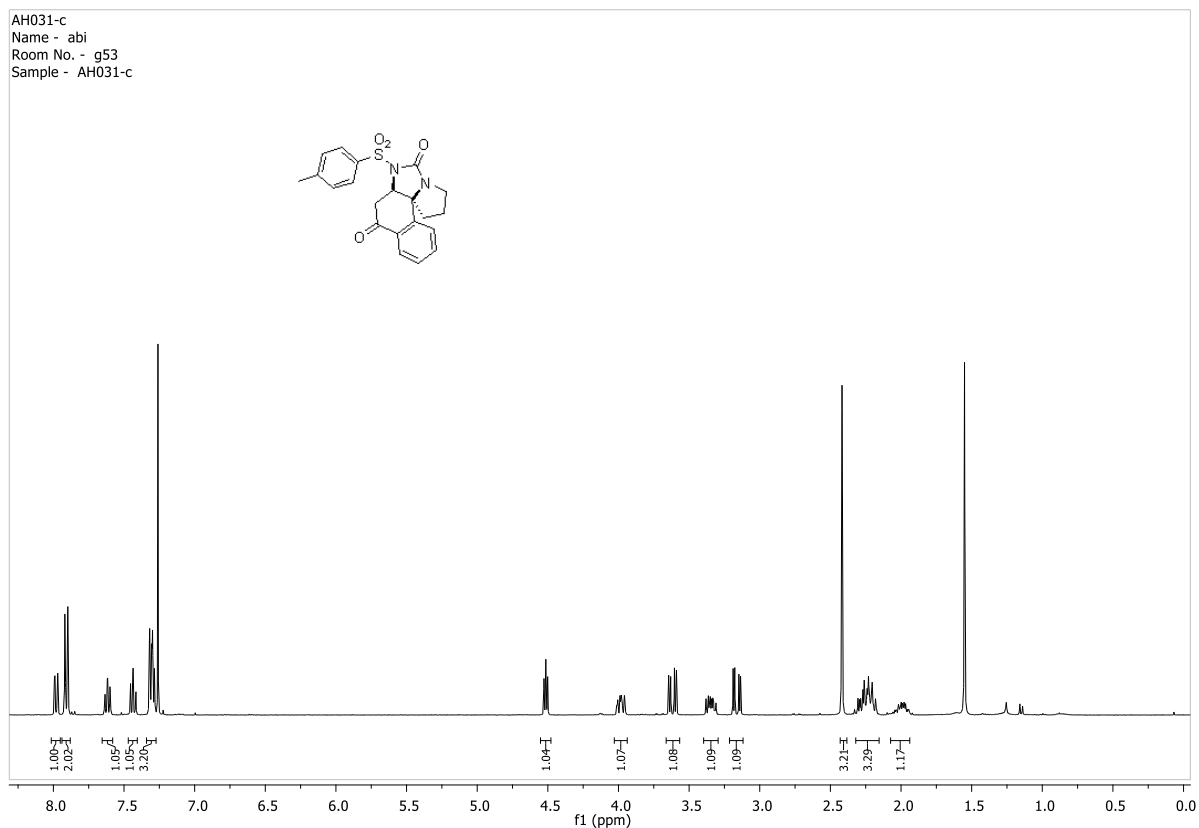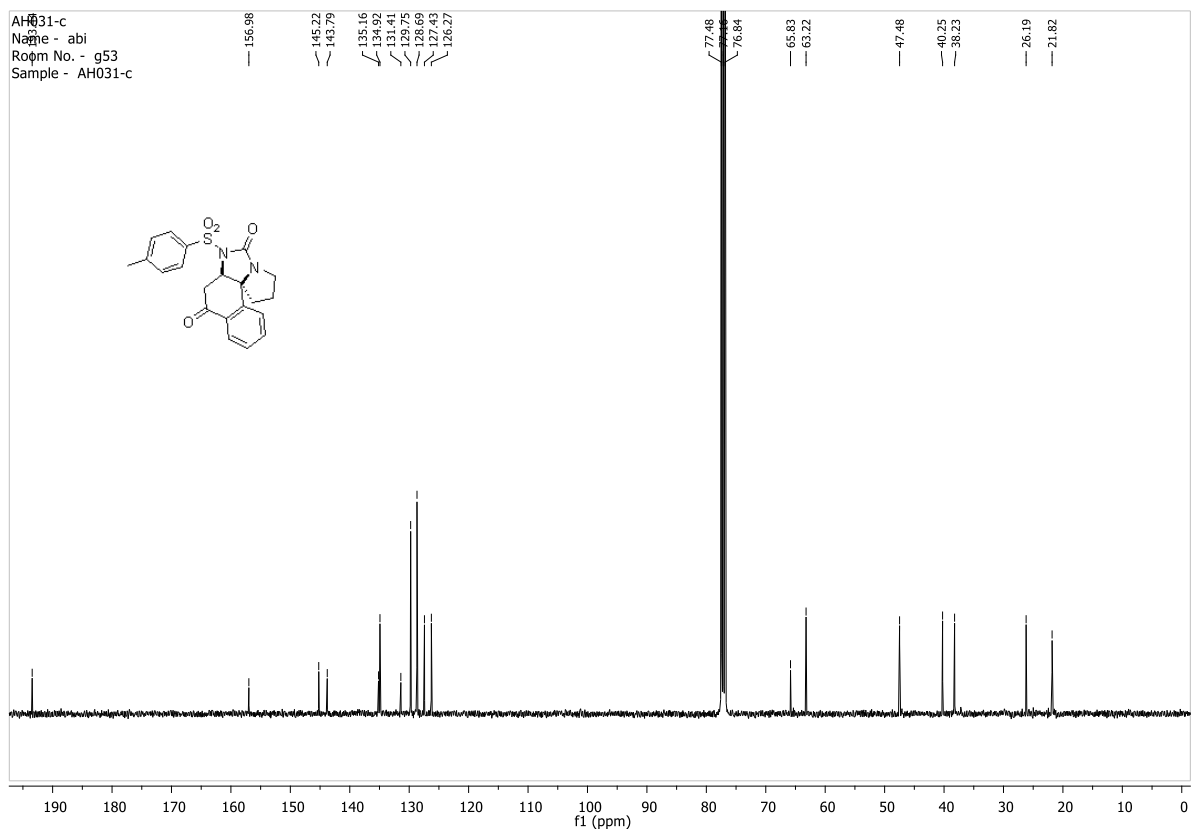

**6-Acetyl-11-cyclopropyl-6,11,13-triazatetracyclo[8.6.0.0<sup>1</sup>,<sup>13</sup>.0<sup>2</sup>,<sup>7</sup>]hexadec-2(7)-ene-8,12-dione 2s**

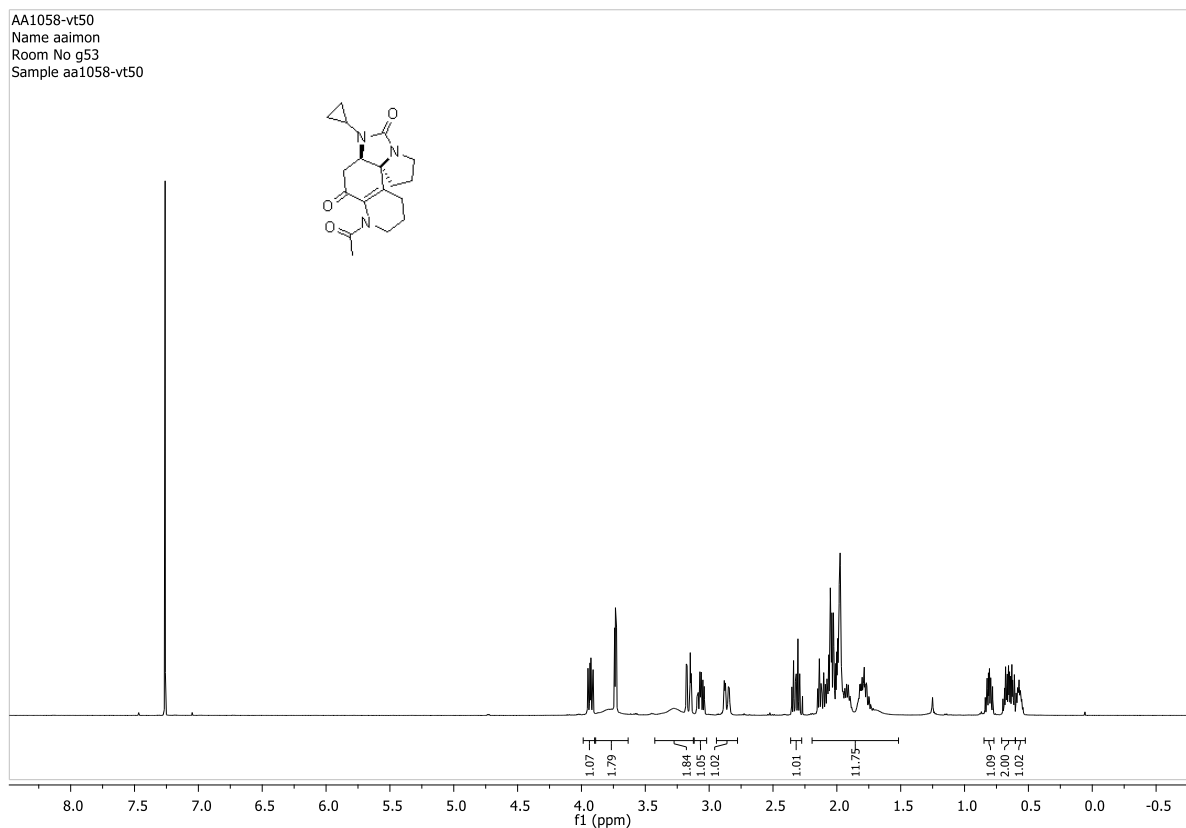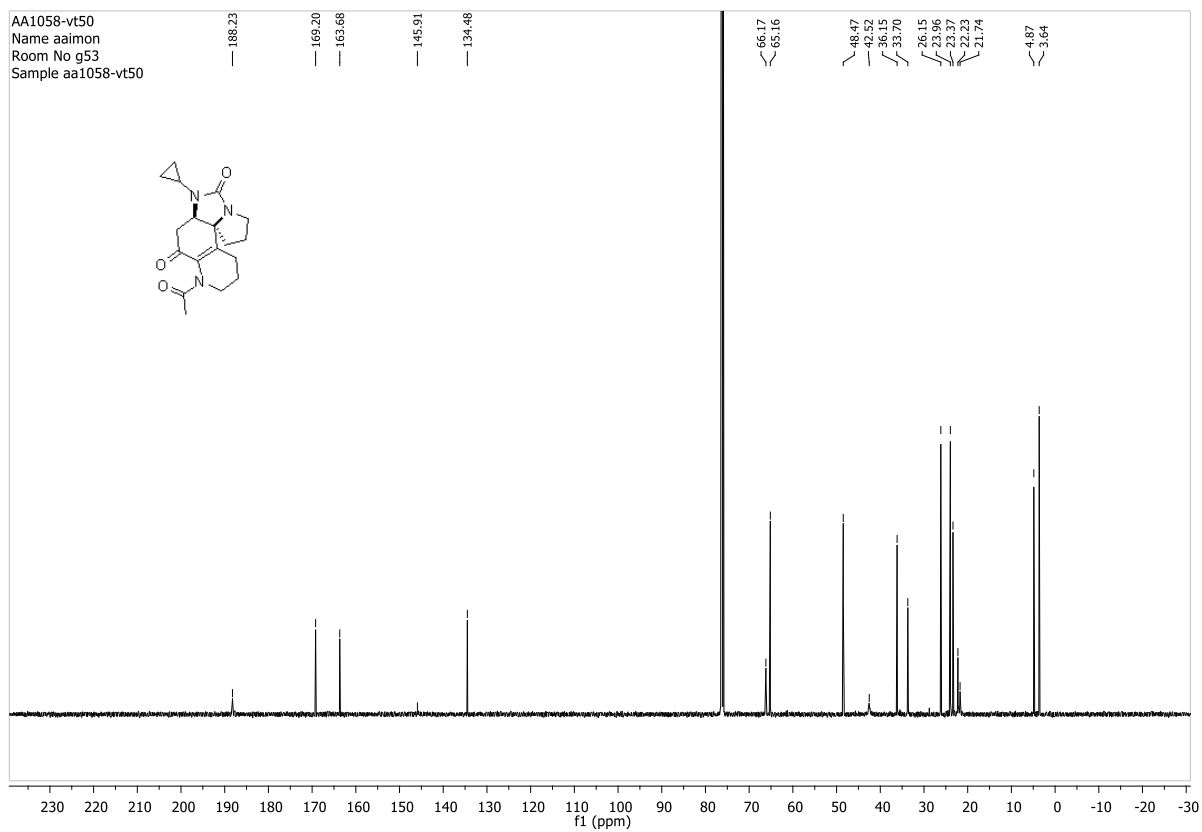

## 2-[[Tris(propan-2-yl)silyl]oxy]benzaldehyde S20

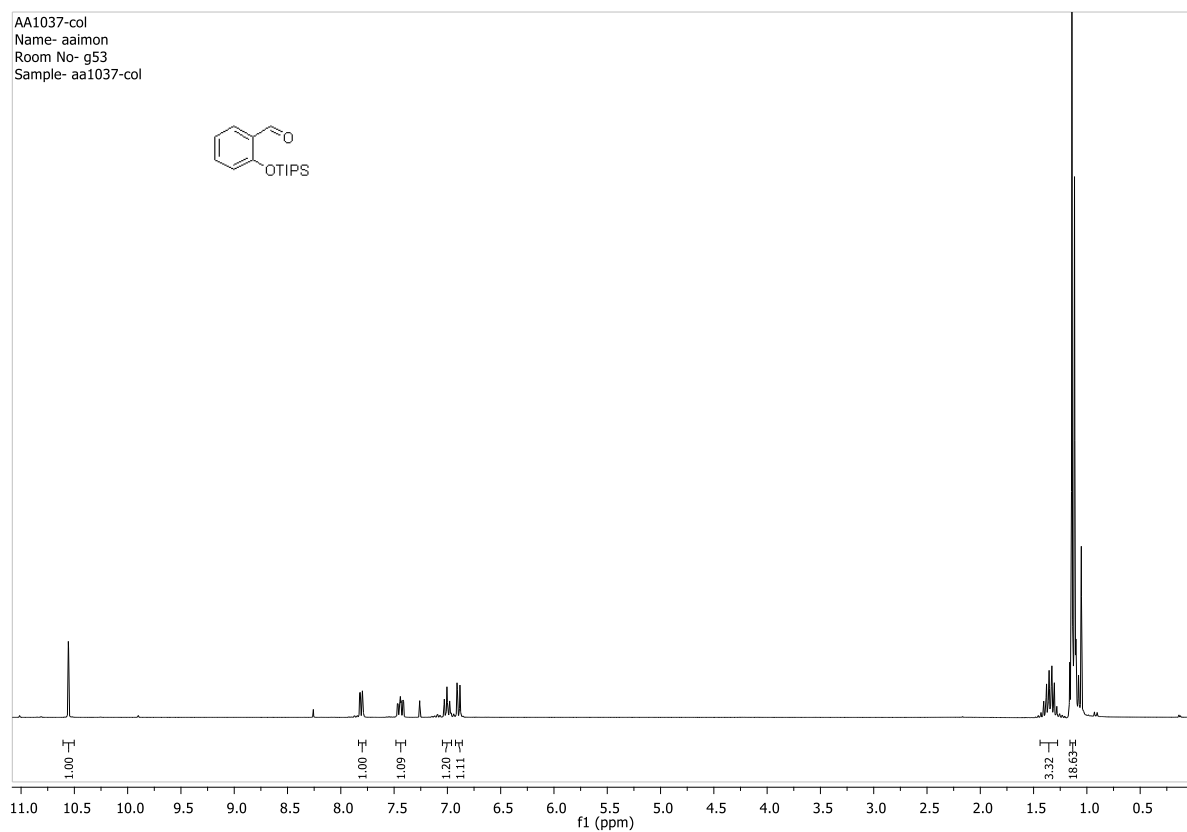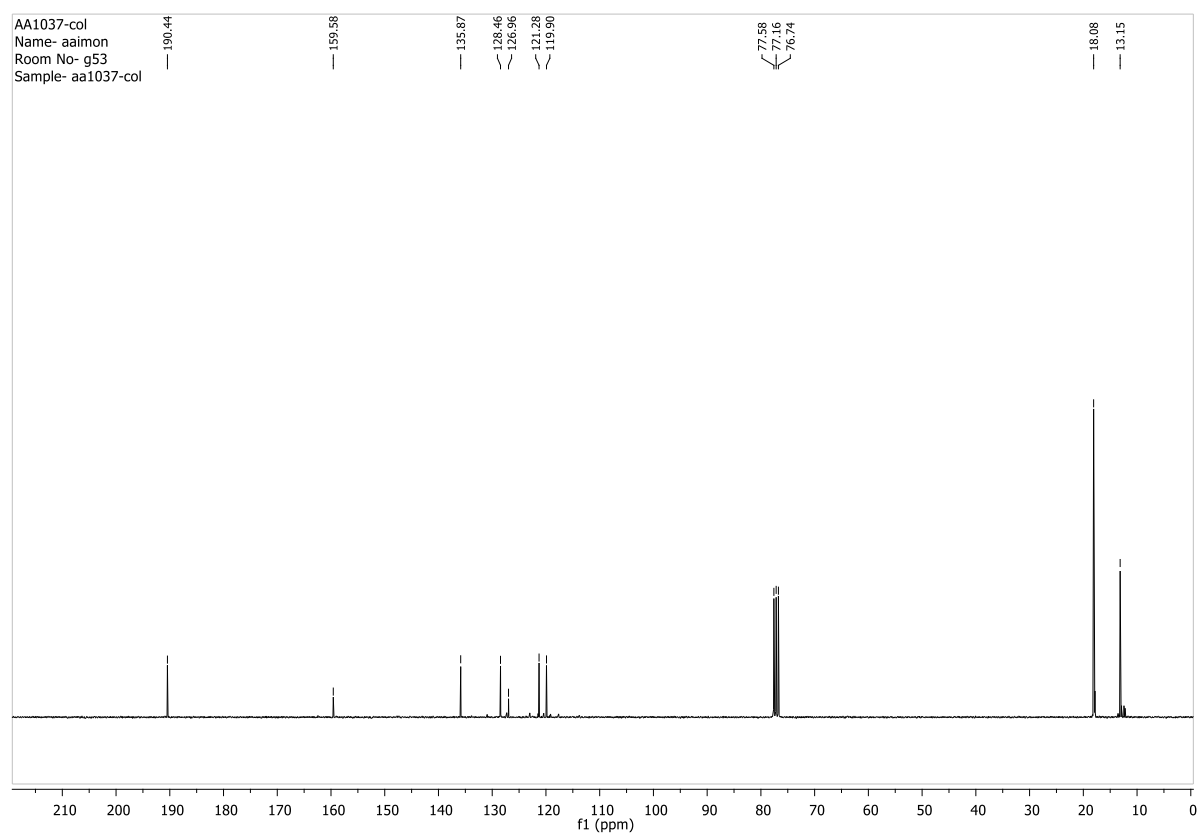

**(2E/2Z)-3-(2-{{Tris(propan-2-yl)silyl}oxy}phenyl)prop-2-enitrile S21**

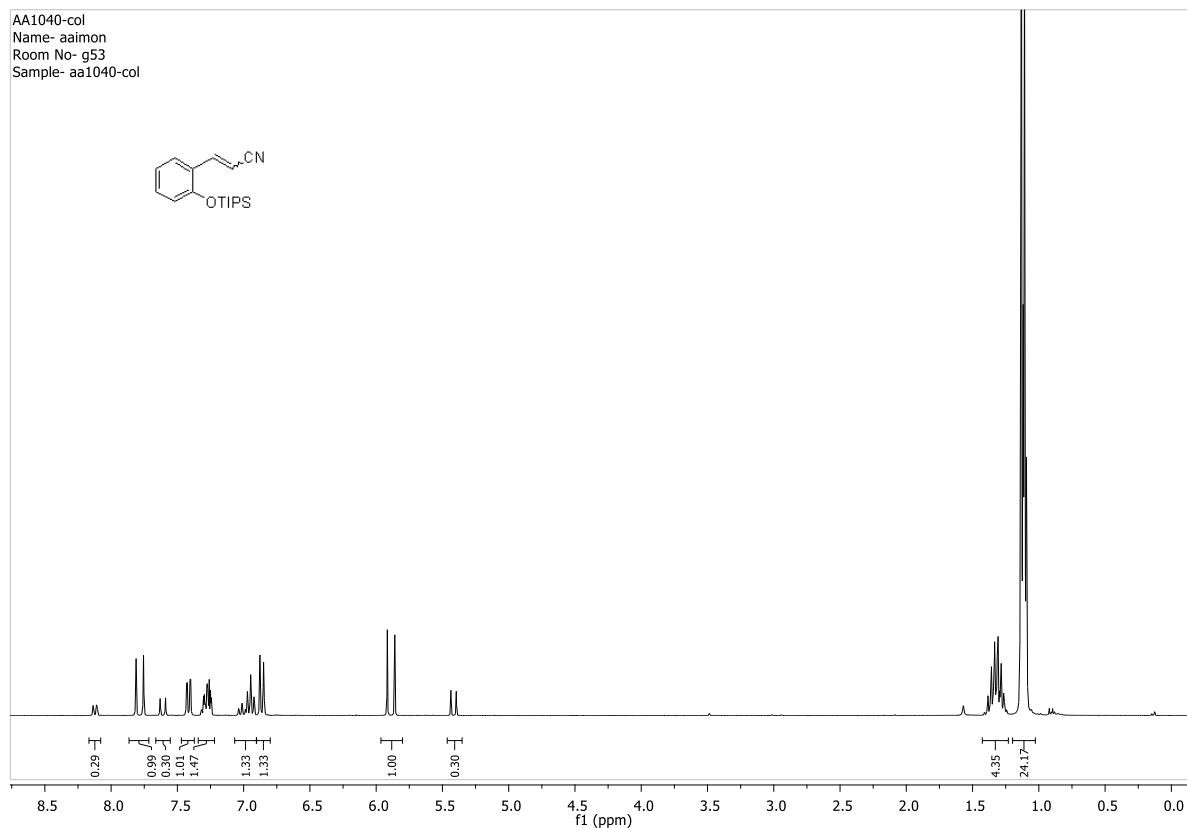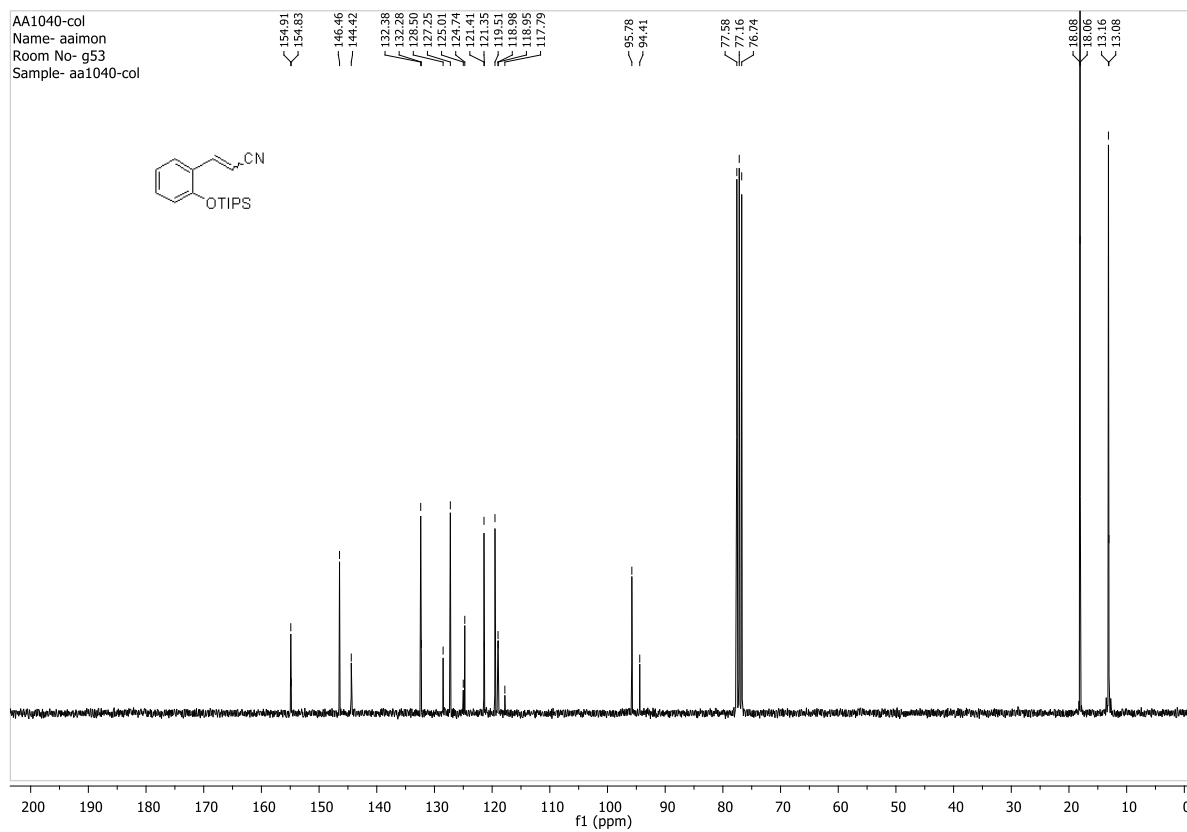

### 3-(Prop-2-en-1-yl)-1-[3-(2-[[tris(propan-2-yl)silyl]oxy}phenyl)propyl]urea S23

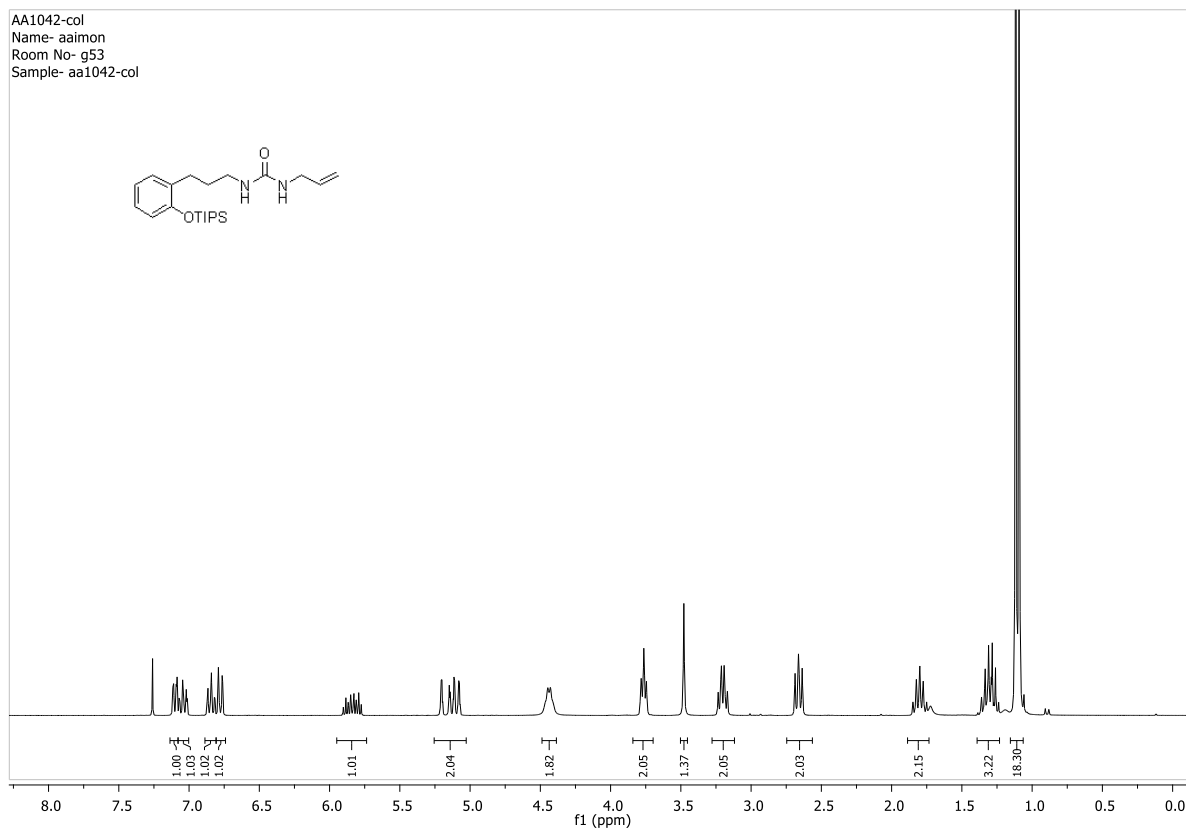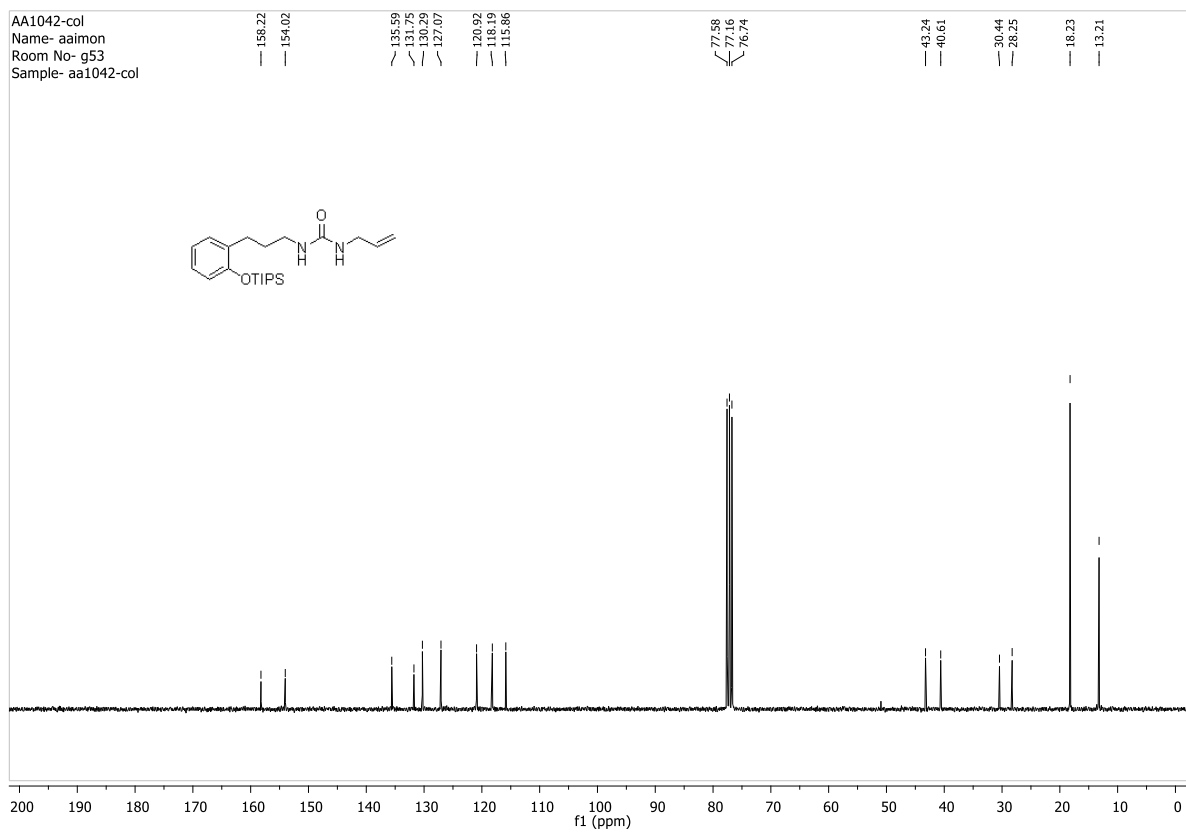

# 1-[3-(2-Hydroxyphenyl)propyl]-3-(prop-2-en-1-yl)urea 3

AA1043-meod  
 Name - aaimon  
 Room No. - g53  
 Sample - aa1043-meod

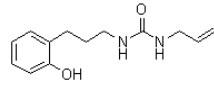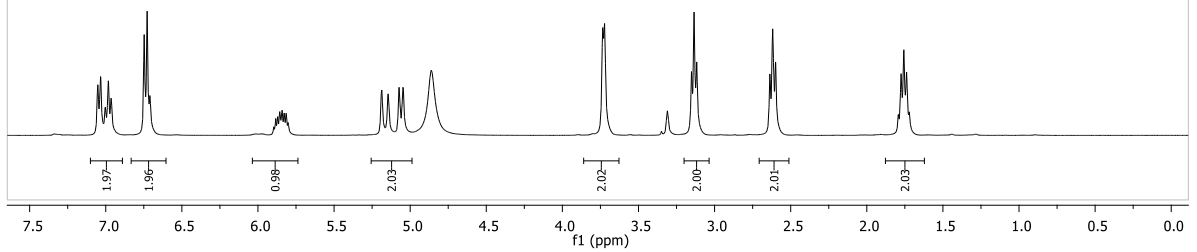

AA1043-meod  
 Name - aaimon  
 Room No. - g53  
 Sample - aa1043-meod

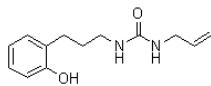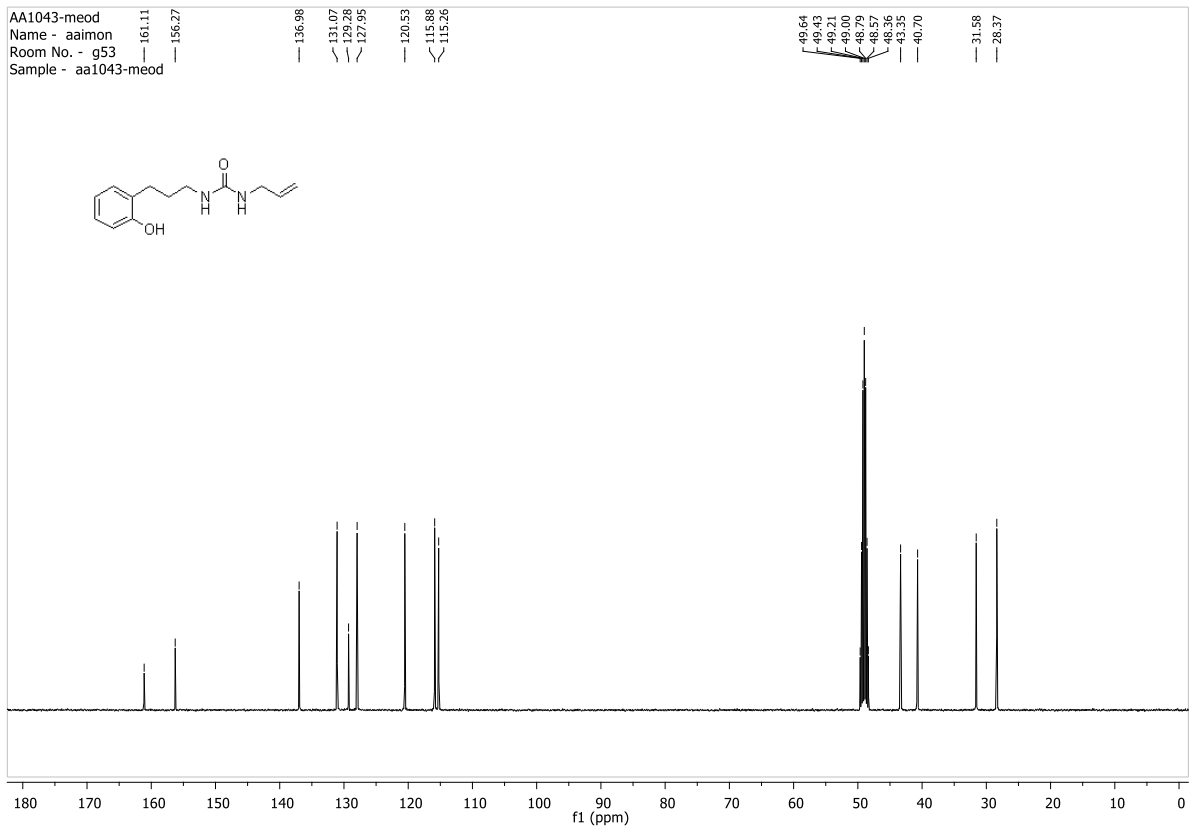



# 8-Hydroxy-*N*-(prop-2-en-1-yl)-1,2,3,4-tetrahydroquinoline-1-carboxamide 4

AA1062-f1  
 Name - aaimon  
 Room No. - g53  
 Sample - aa1062-f1

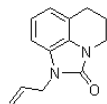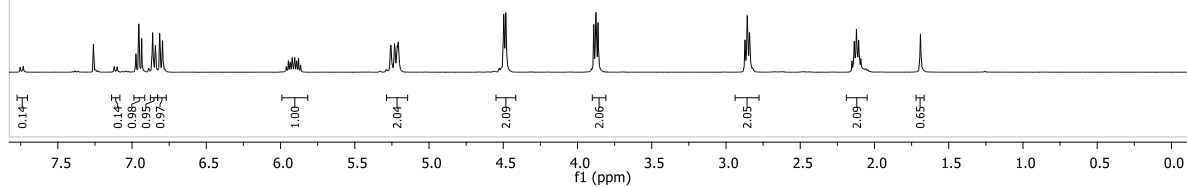

AA1062-f1  
 Name - aaimon  
 Room No. - g53  
 Sample - aa1062-f1

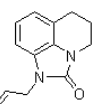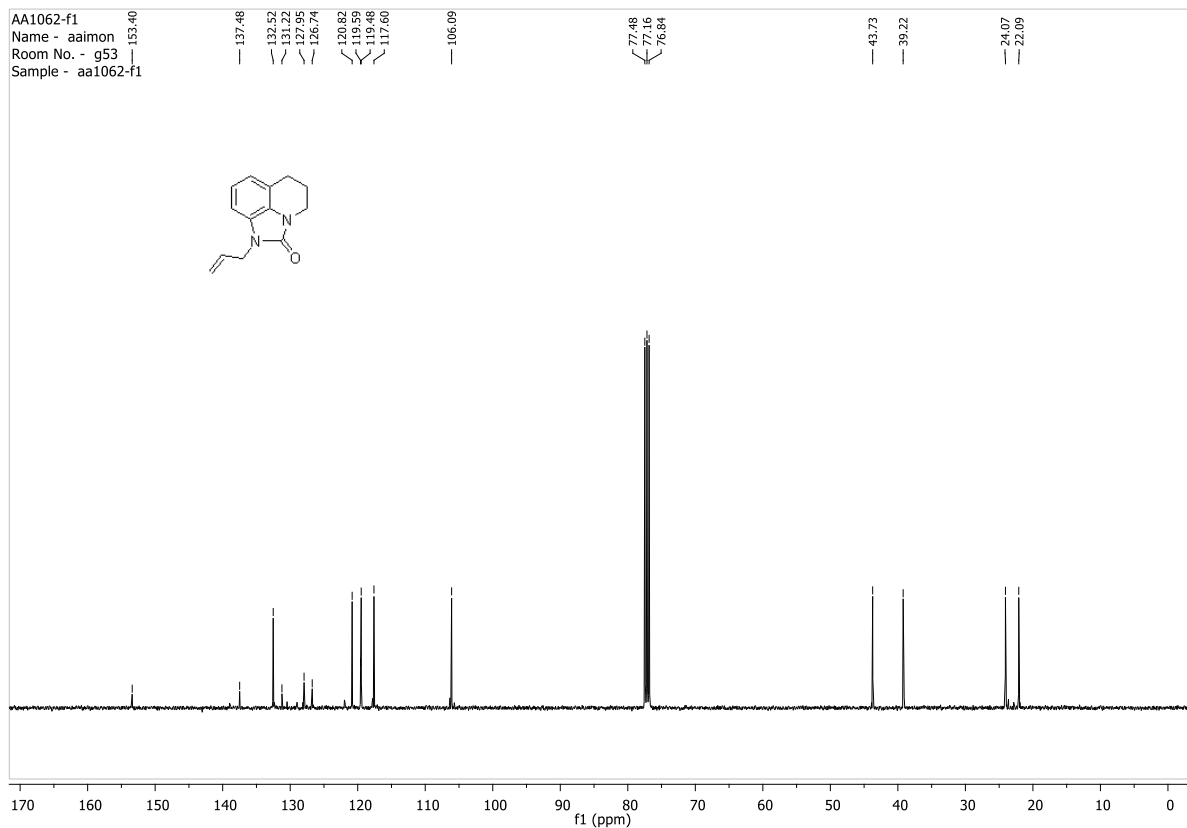

# Ethyl 2-([3-(3-methoxy-4-[[tris(propan-2-yl)silyl]oxy]phenyl)propyl]carbamoyl)acetate S24

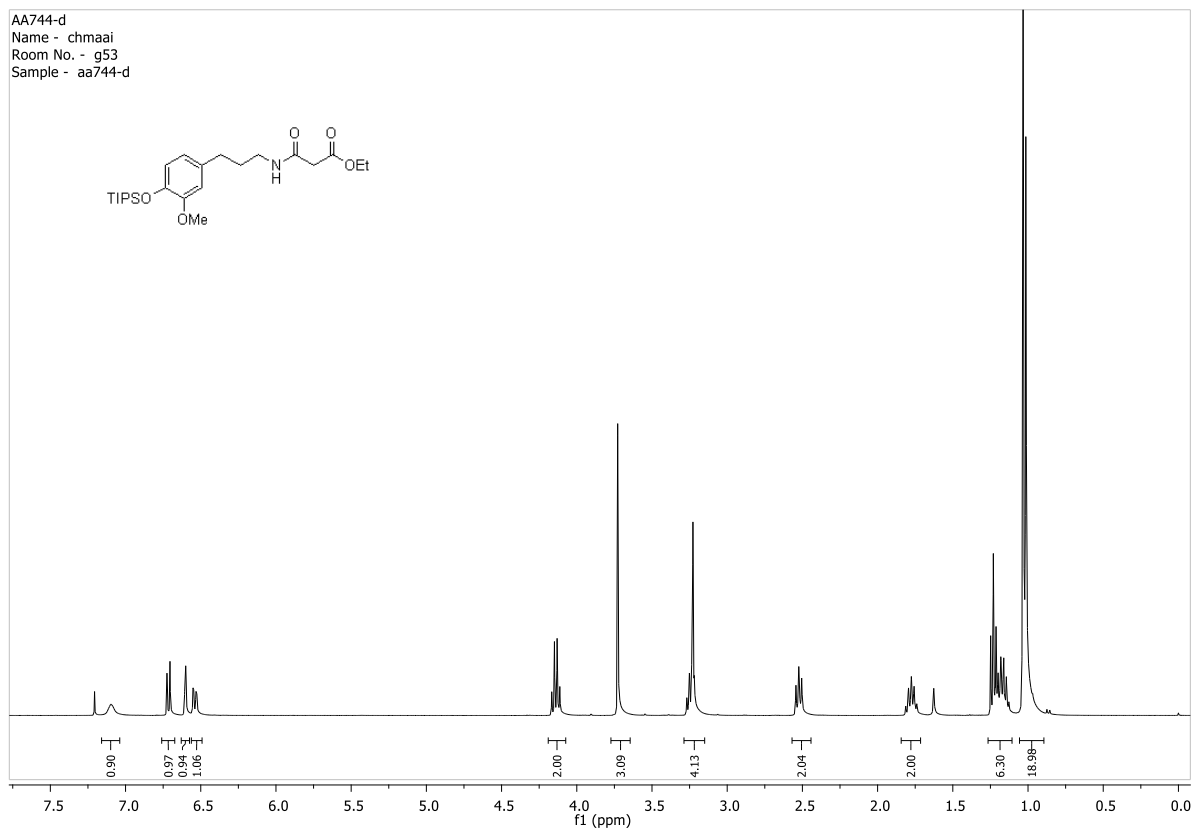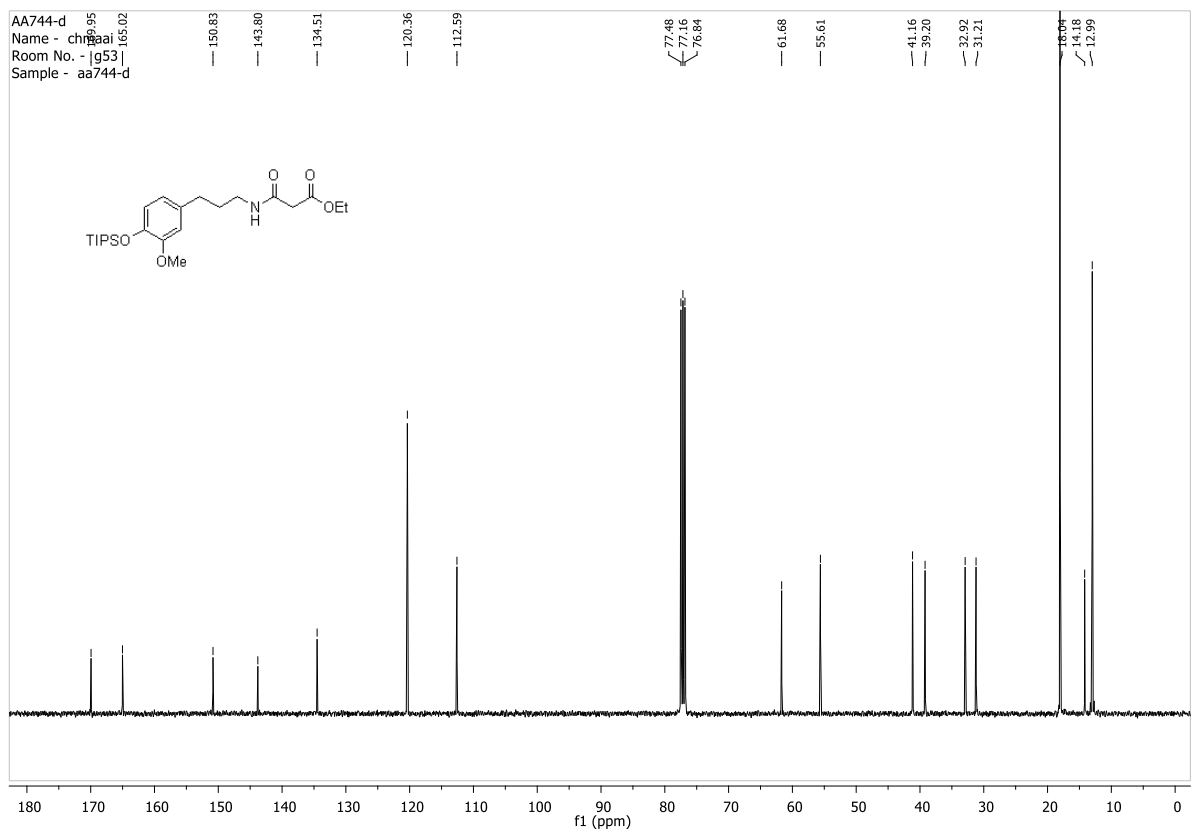

# Ethyl 2-([3-(4-hydroxy-3-methoxyphenyl)propyl]carbamoyl)acetate 5

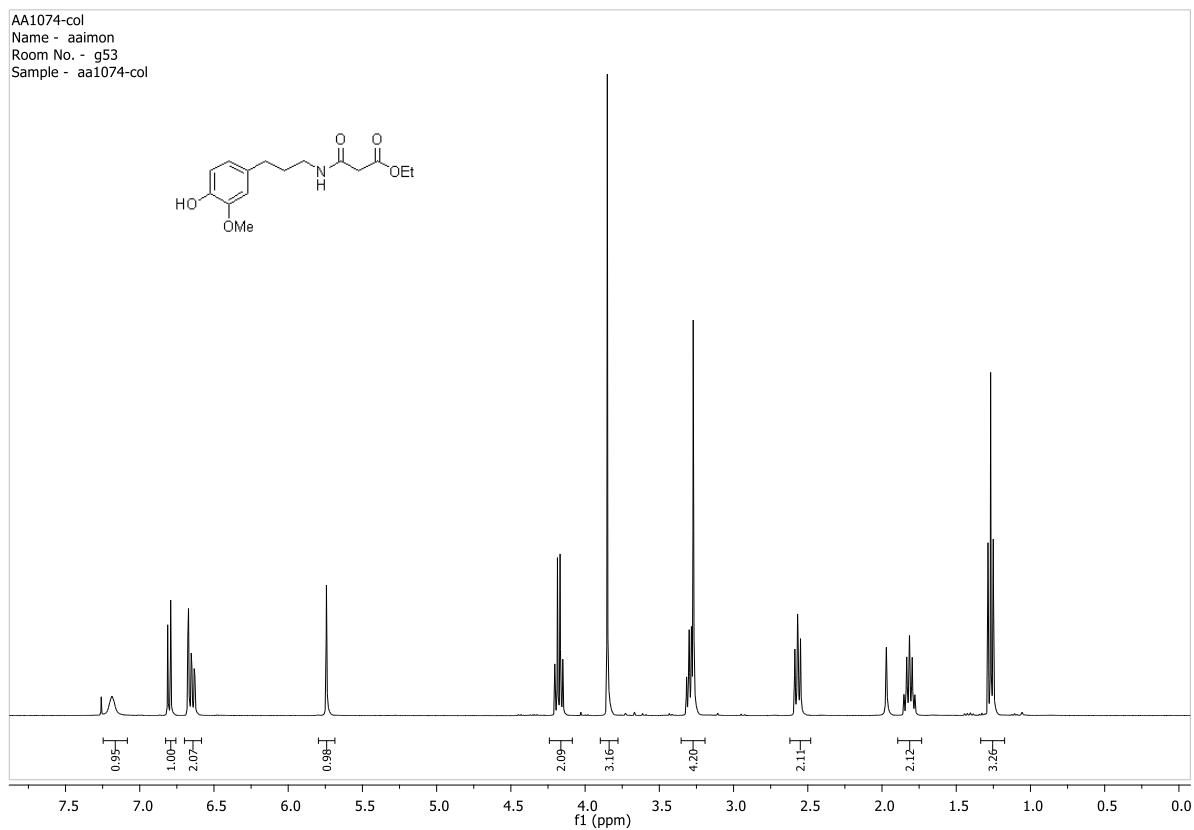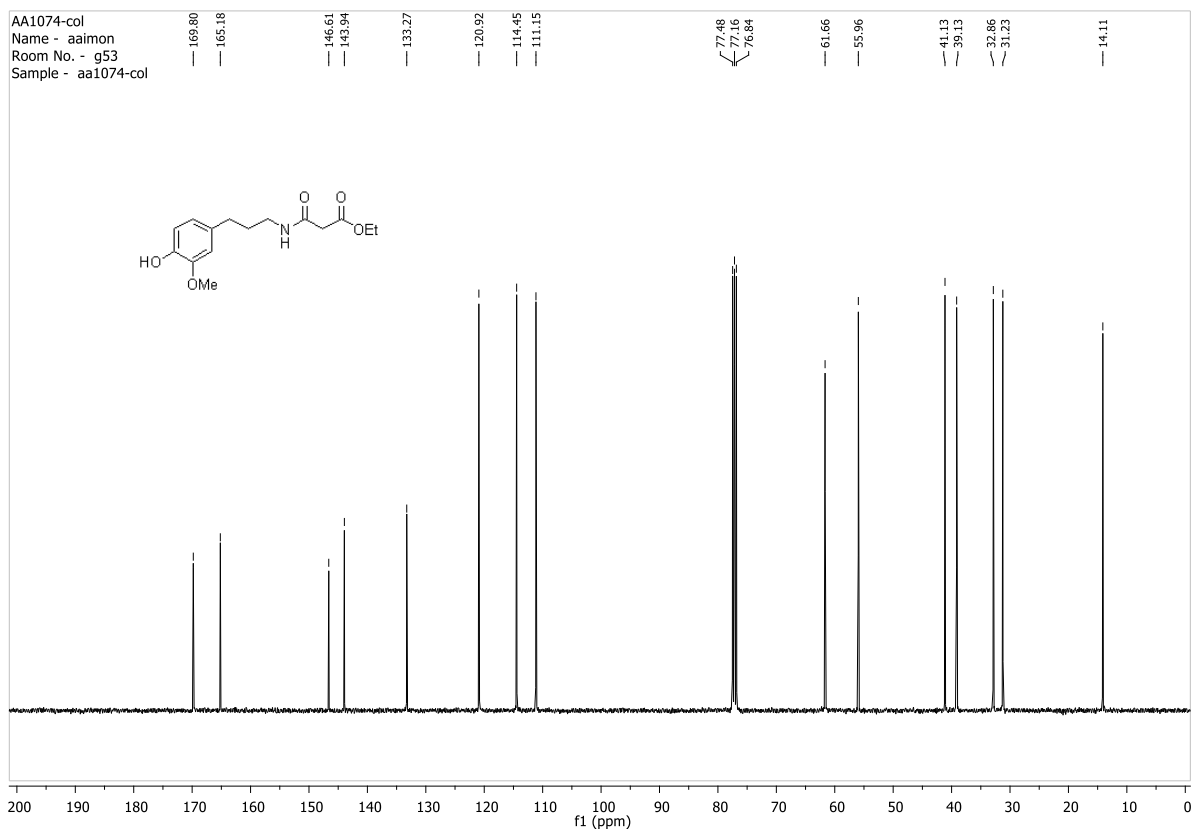

**Ethyl 2-methoxy-3,6-dioxo-3*H*,4*H*,5*H*,6*H*,8*H*,9*H*,10*H*,10*bH*-cyclohexa[*h*]pyrrolizine-5-carboxylate 6**

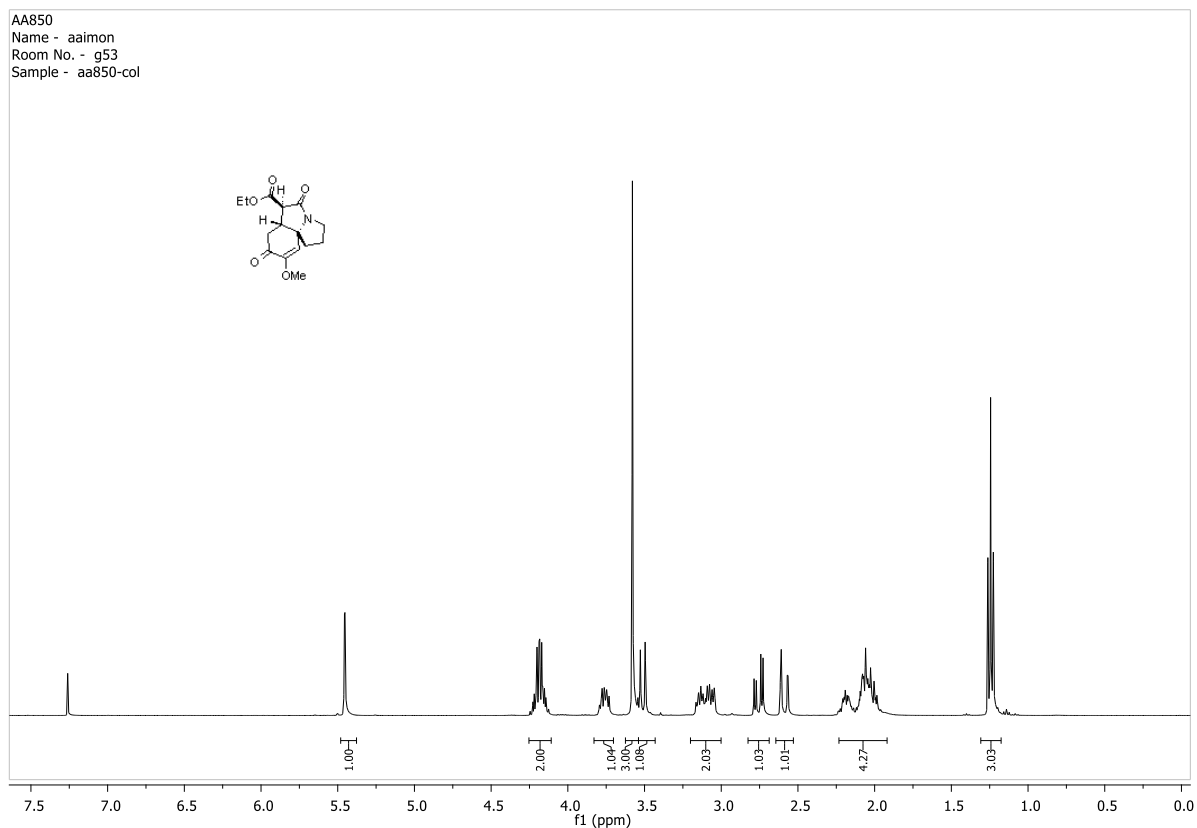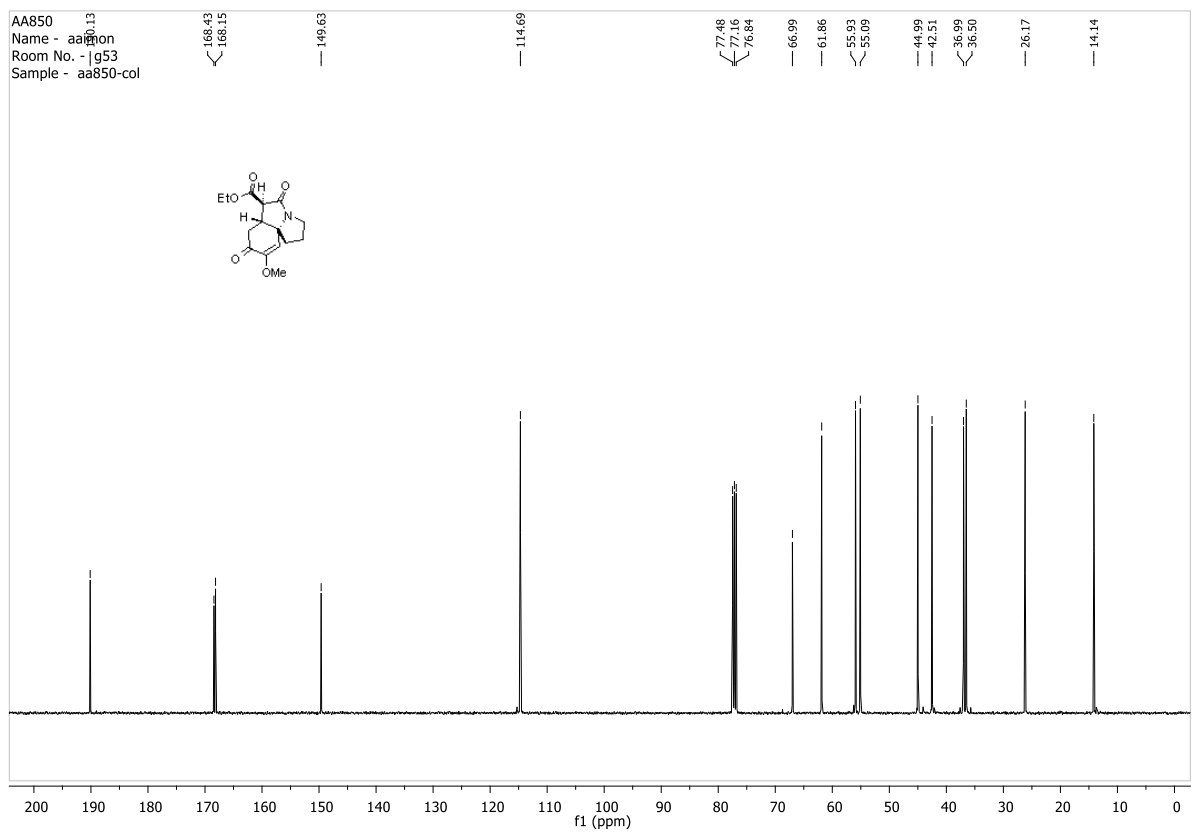

### 6-Isopropylhexahydro-1*H*,5*H*-benzo[*d*]pyrrolo[1,2-*c*]imidazole-5,8(6*H*)-dione 7

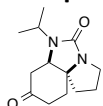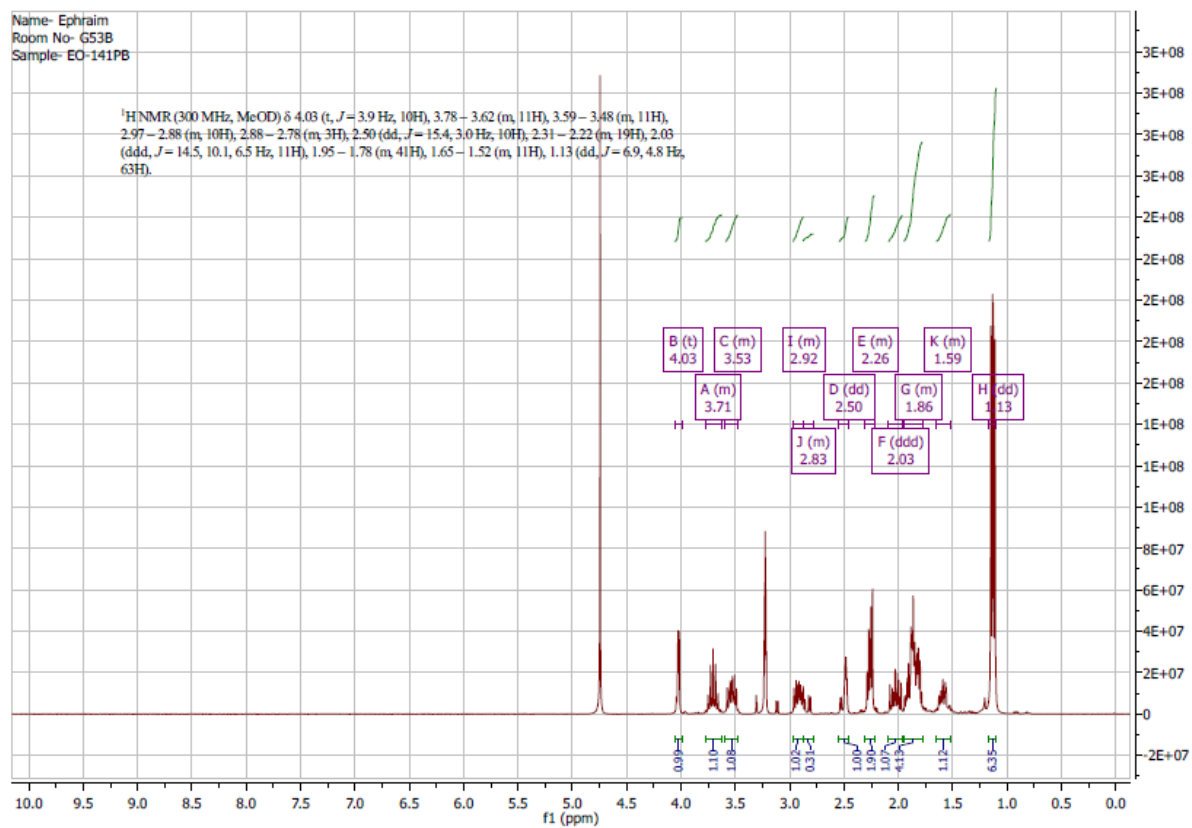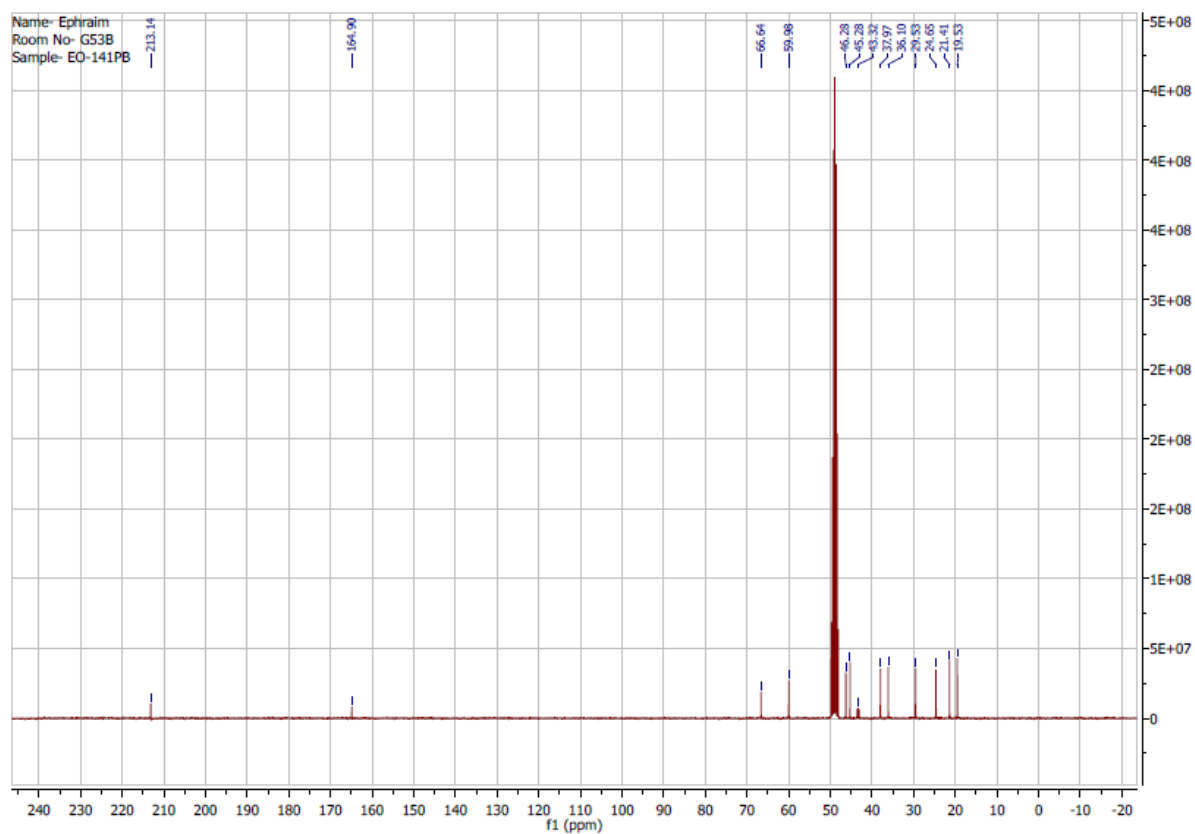

6-(4-Toluenesulfonyl)hexahydro-1*H*,5*H*-benzo[*d*]pyrrolo[1,2-*c*]imidazole-5,8(6*H*)-dione **8**

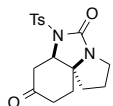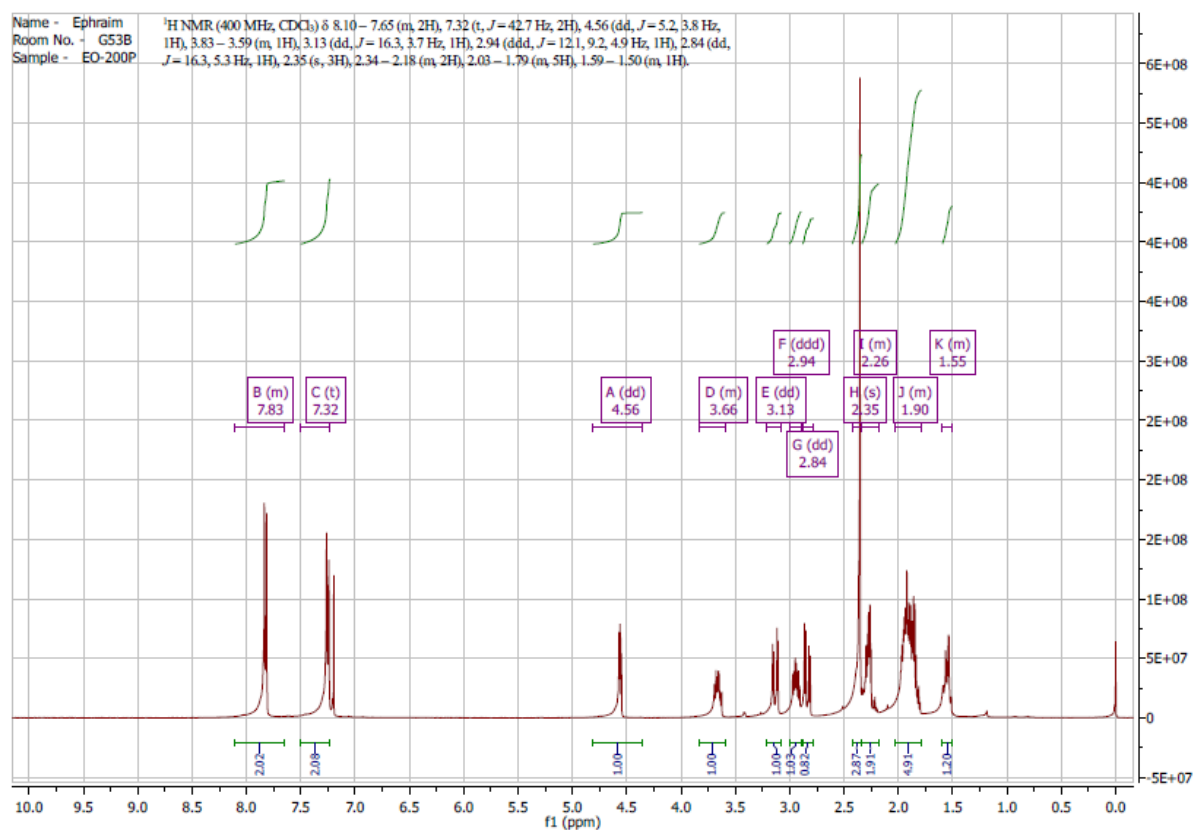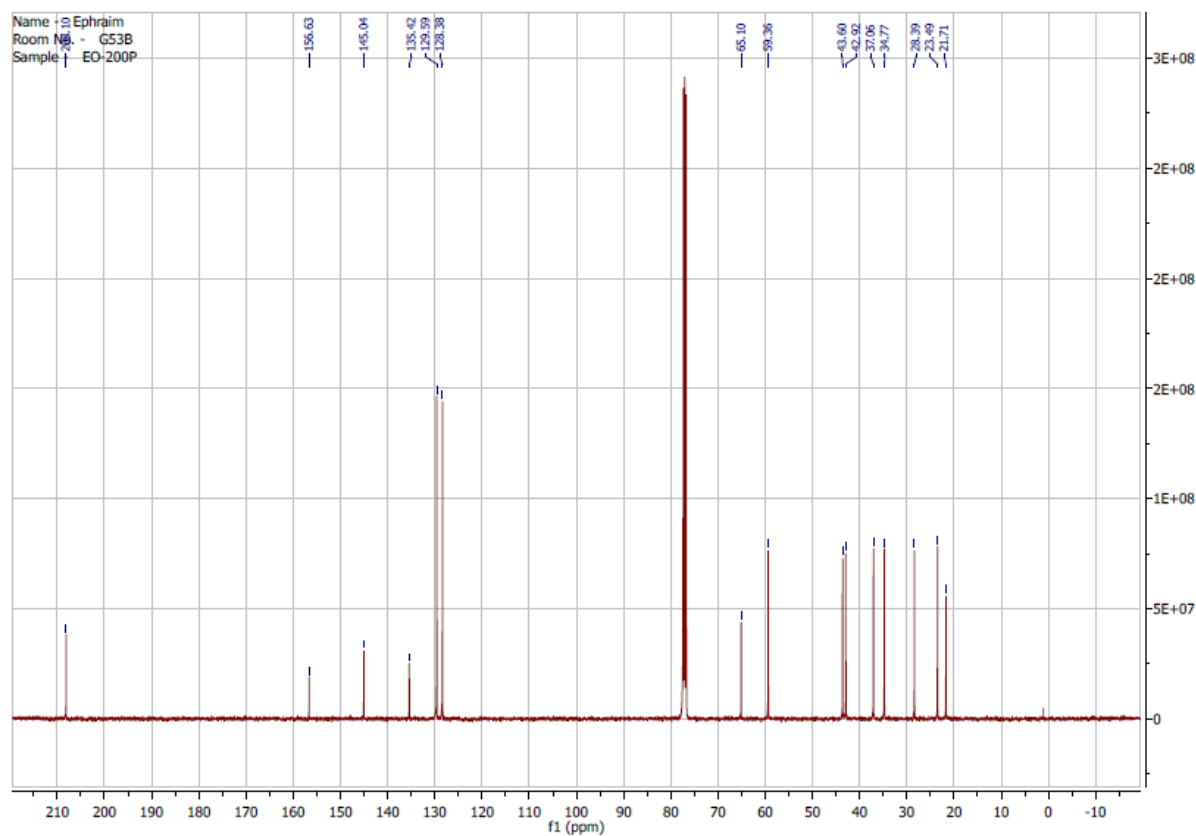

# 6-(4-Methoxyphenyl)hexahydro-1*H*,5*H*-benzo[*d*]pyrrolo[1,2-*c*]imidazole-5,8(6*H*)-dione 9

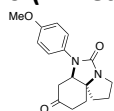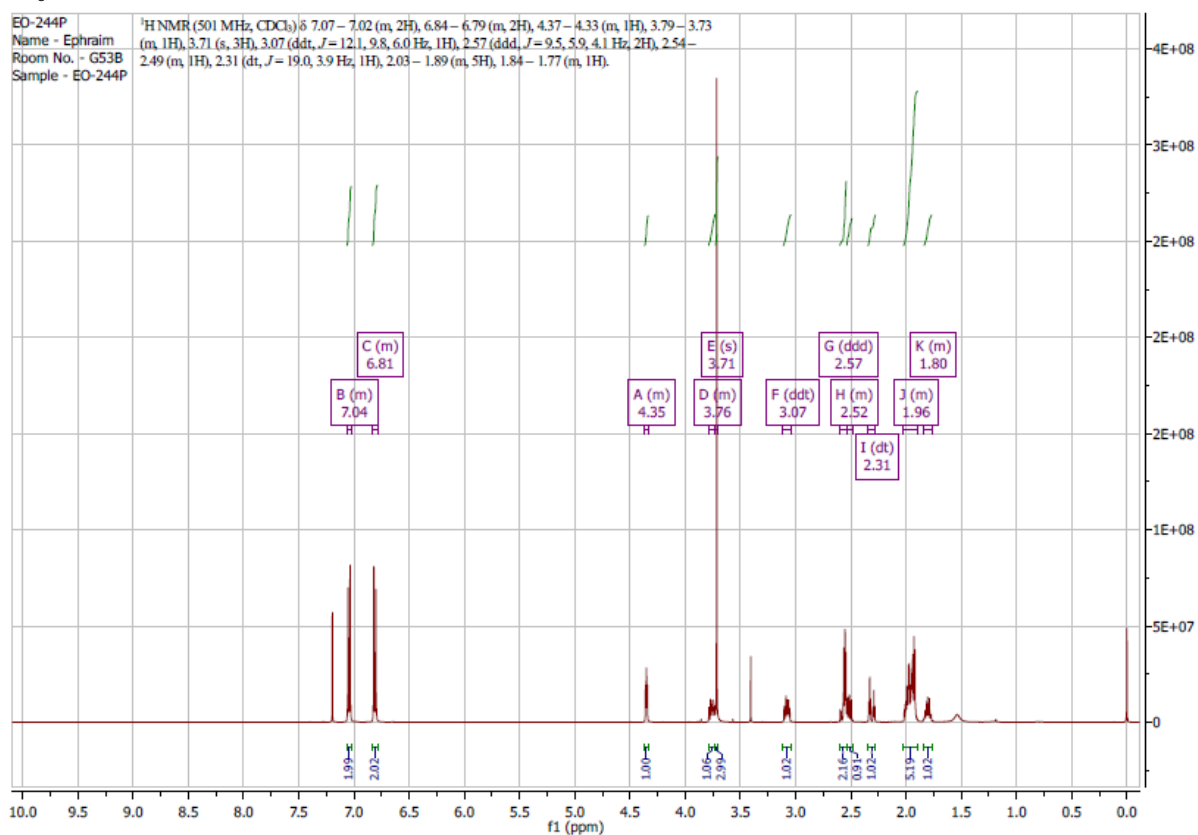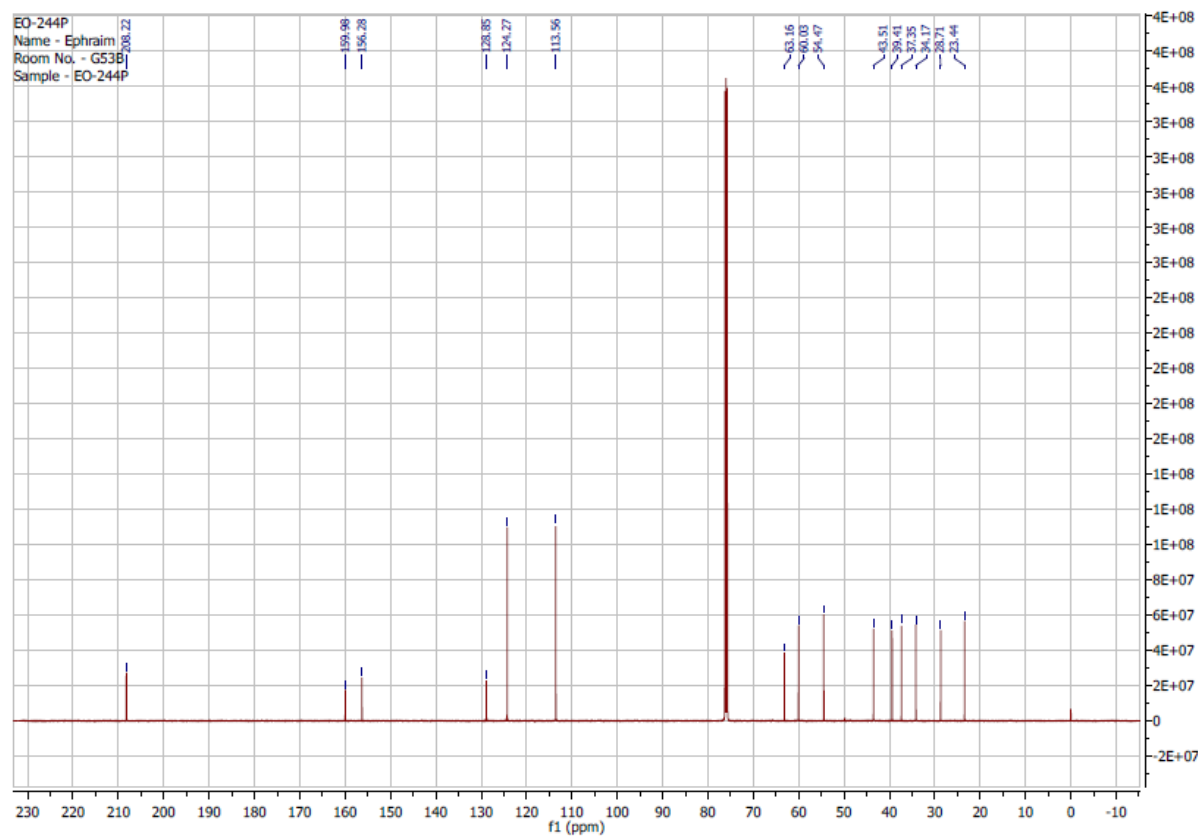

# 8-Hydroxy-6-isopropyloctahydro-1*H*,5*H*-benzo[*d*]pyrrolo[1,2-*c*]imidazol-5-one 10

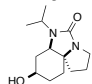

EO-294P  
Name - Ephraim  
Room No. - G53B  
Sample - EO-294P

<sup>1</sup>H NMR (501 MHz, CDCl<sub>3</sub>) δ 4.04 – 3.94 (m, 1H), 3.81 – 3.74 (m, 1H), 3.61 – 3.52 (m, 1H), 3.44 (dd, *J* = 10.1, 6.5 Hz, 1H), 2.88 – 2.80 (m, 1H), 2.33 (dddd, *J* = 12.7, 6.5, 4.3, 2.2 Hz, 1H), 2.17 – 2.04 (m, 1H), 1.89 – 1.81 (m, 1H), 1.80 – 1.62 (m, 4H), 1.50 – 1.43 (m, 1H), 1.38 (tdd, *J* = 11.5, 8.8, 3.6 Hz, 3H), 1.31 – 1.23 (m, 1H), 1.15 (d, *J* = 6.8 Hz, 3H), 1.11 (d, *J* = 6.9 Hz, 3H).

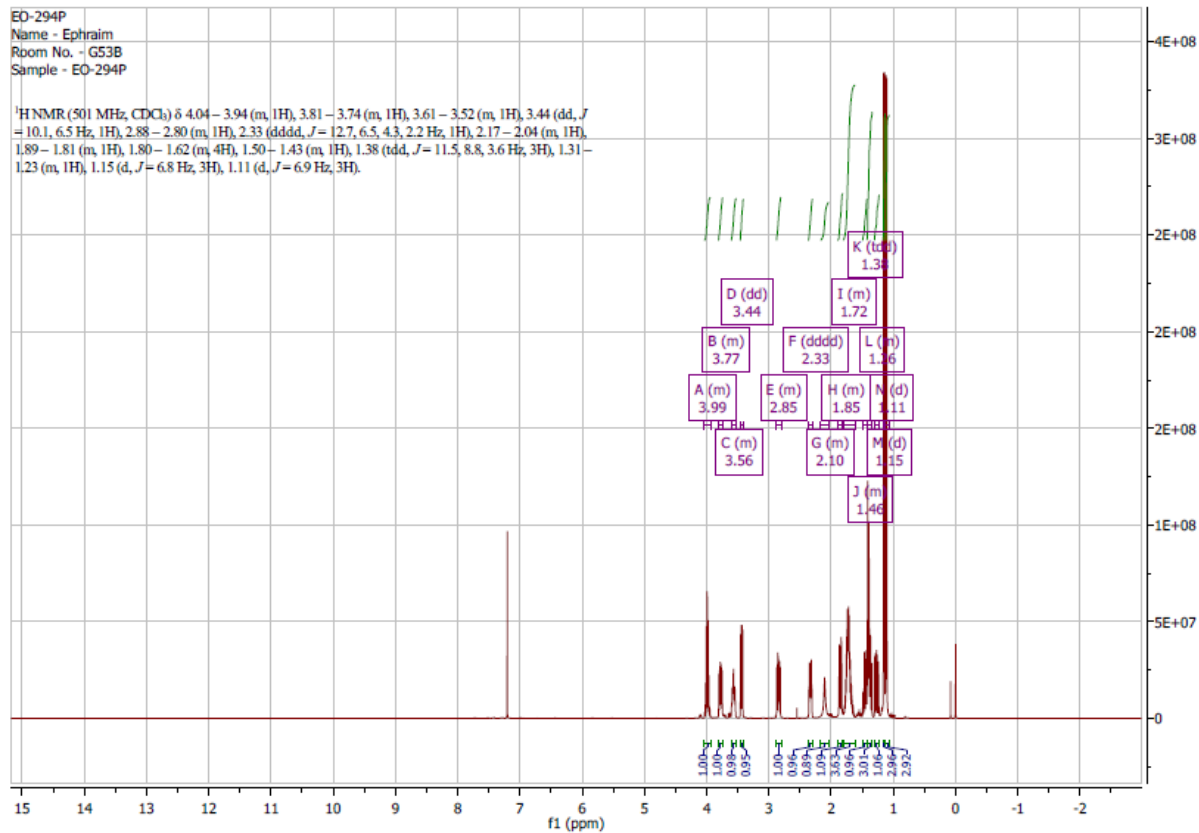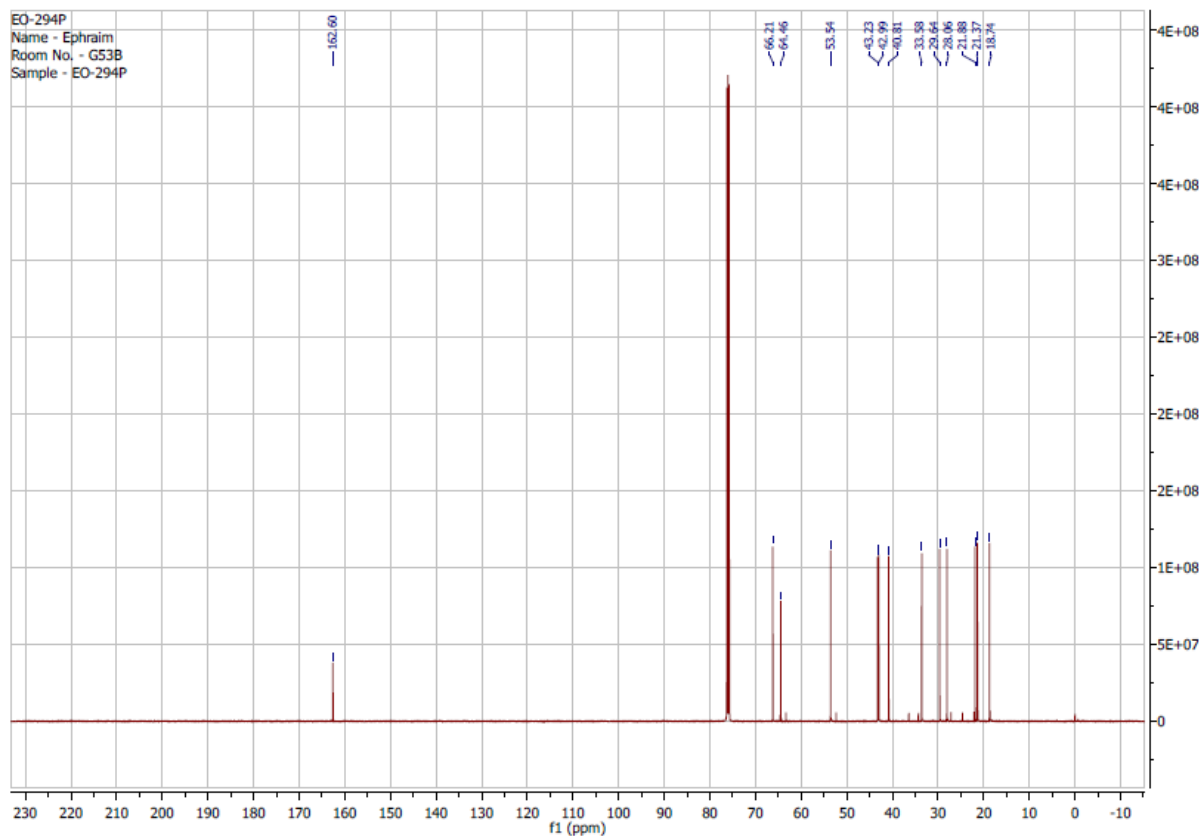



**6-Isopropyl-5-oxooctahydro-1*H*,5*H*-benzo[*d*]pyrrolo[1,2-*c*]imidazol-8-yl  
fluorophenyl)carbamate S25**

(3-

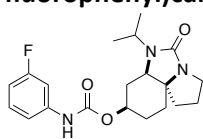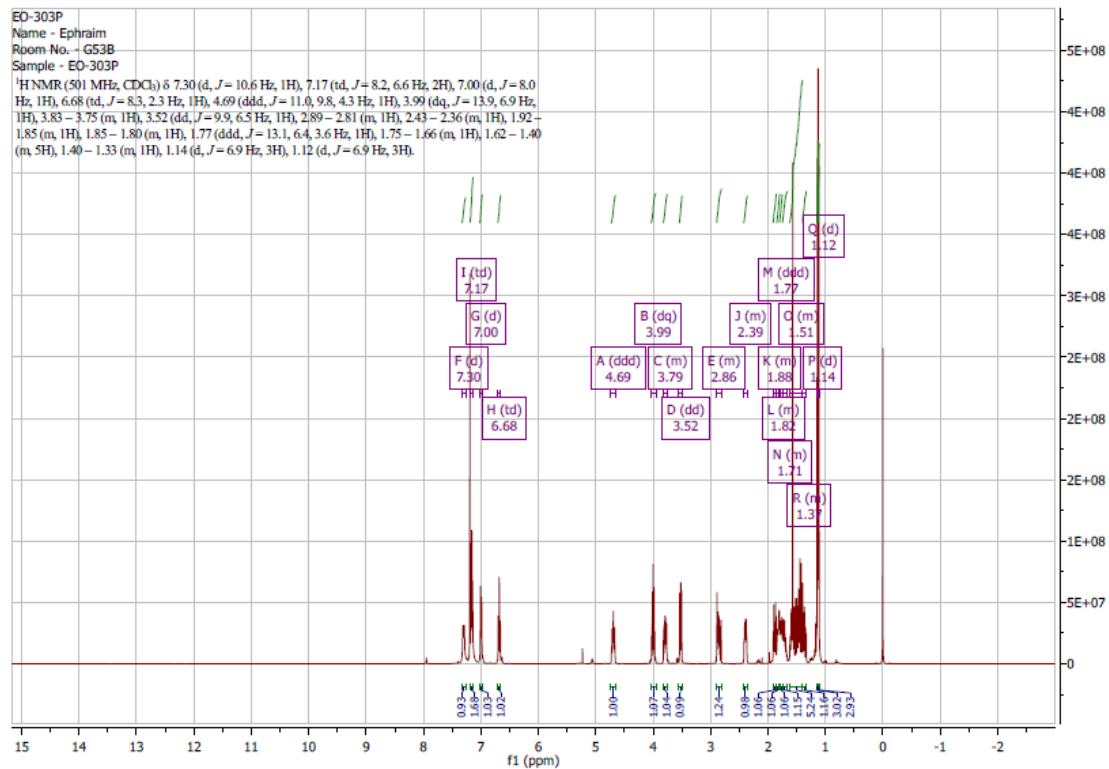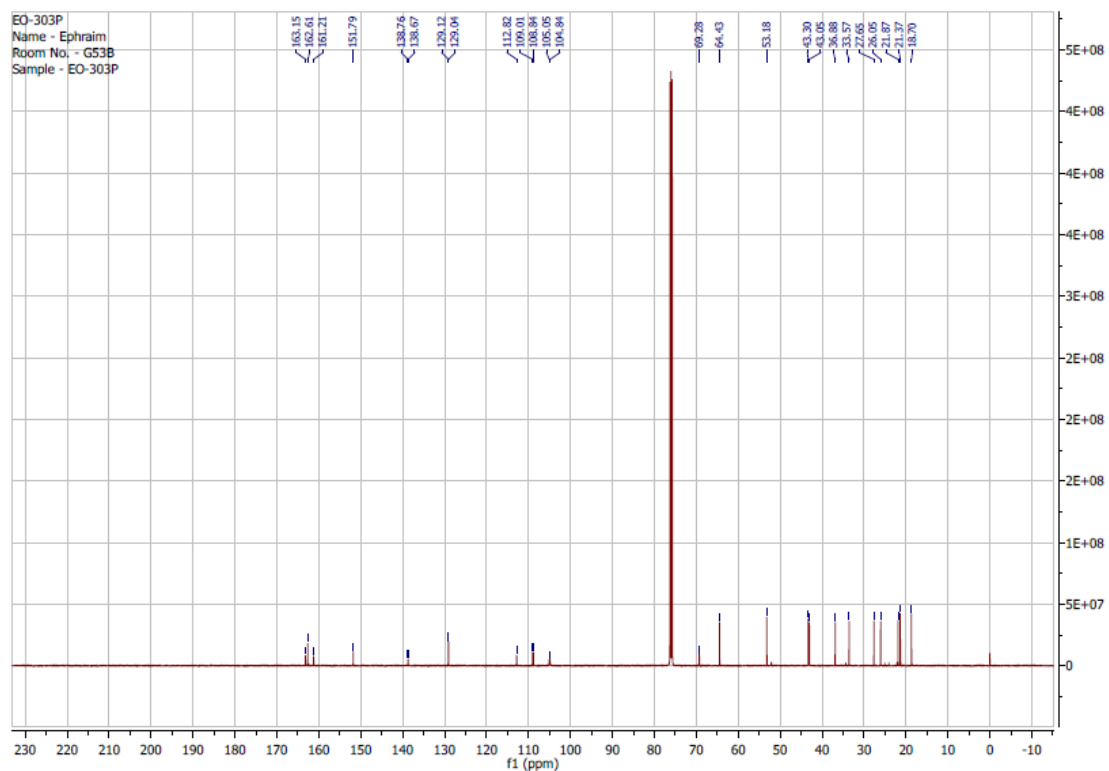

# 8-Hydroxy-6-(4-toluenesulfonyl)octahydro-1*H*,5*H*-benzo[*d*]pyrrolo[1,2-*c*]imidazol-5-one 11

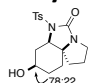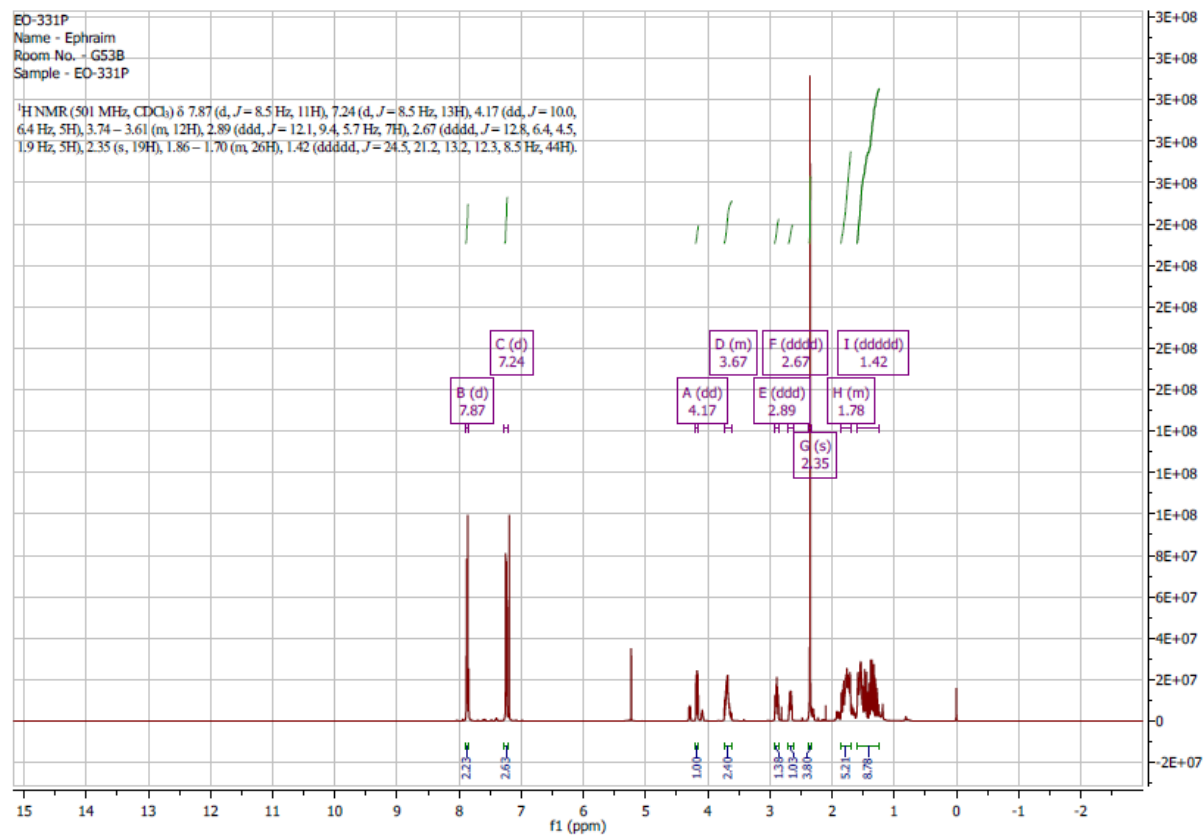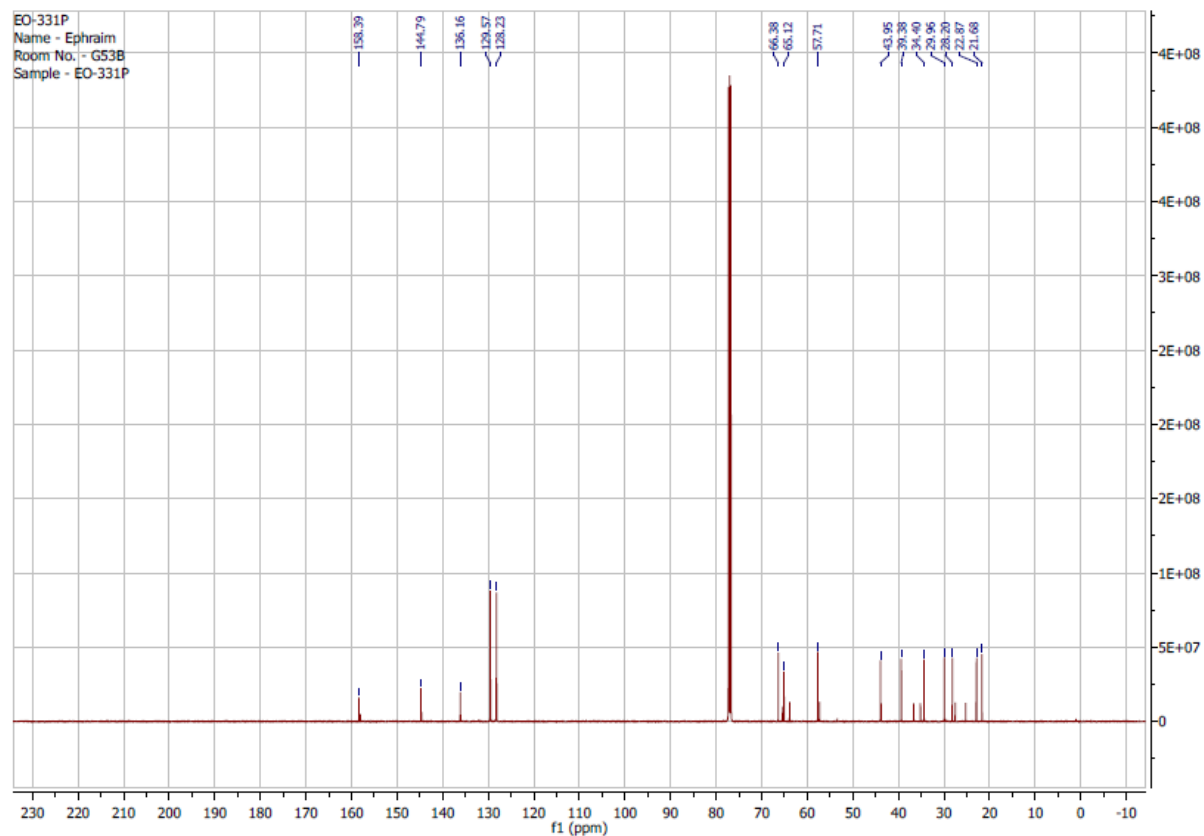

# 8-Hydroxy-6-(4-methoxyphenyl)octahydro-1*H*,5*H*-benzo[*d*]pyrrolo[1,2-*c*]imidazol-5-one 12

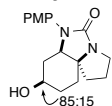

EO-320P  
Name - Ephraim  
Room No. - G53B  
Sample - EO-320P

<sup>1</sup>H NMR (501 MHz, CDCl<sub>3</sub>) δ 7.29 – 7.25 (m, 2H), 6.83 – 6.78 (m, 2H), 3.96 (dd, *J* = 9.5, 6.2 Hz, 1H), 3.85 (ddd, *J* = 12.3, 9.0, 5.5 Hz, 1H), 3.72 (s, 3H), 3.65 (qd, *J* = 9.0, 4.3 Hz, 1H), 3.03 – 2.94 (m, 1H), 2.24 (dddd, *J* = 12.7, 6.2, 4.5, 1.9 Hz, 1H), 1.94 – 1.88 (m, 1H), 1.88 – 1.62 (m, 6H), 1.49 (tdd, *J* = 12.9, 9.4, 3.6 Hz, 1H), 1.41 – 1.31 (m, 2H).

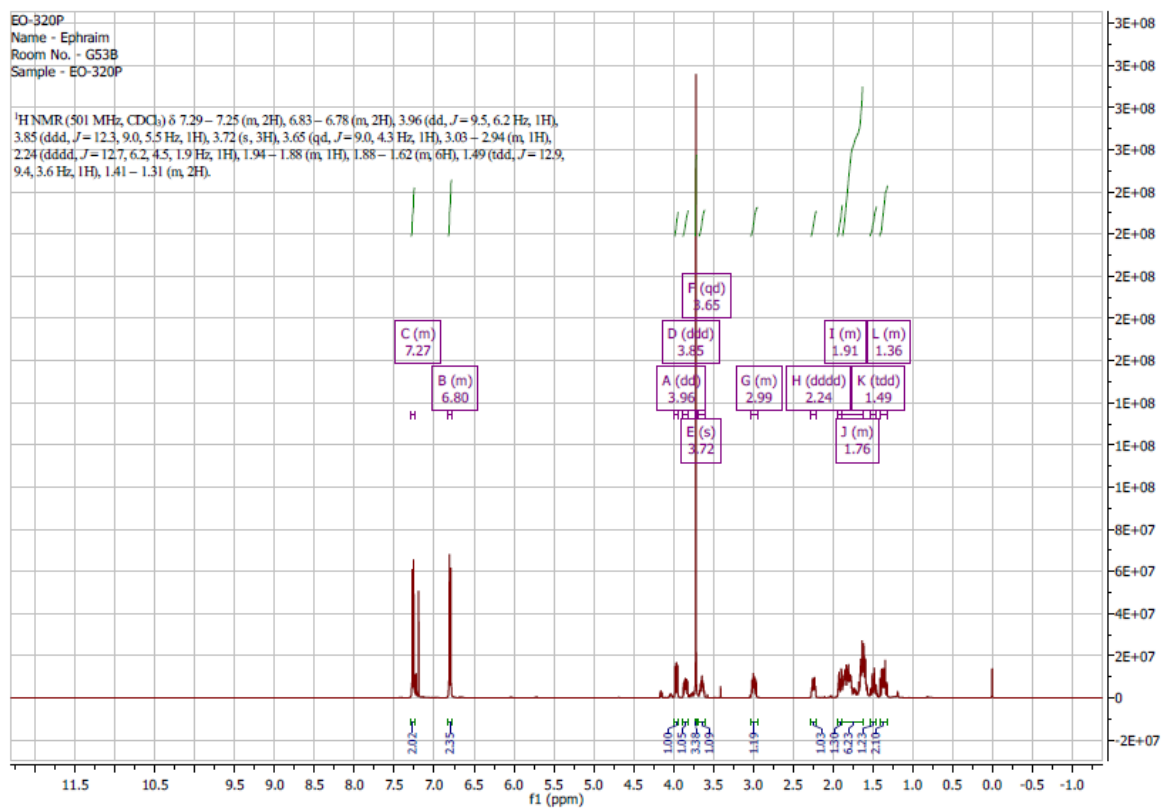

EO-320P  
Name - Ephraim  
Room No. - G53B  
Sample - EO-320P

<sup>1</sup>H NMR (501 MHz, CDCl<sub>3</sub>) δ 7.29 – 7.25 (m, 2H), 6.83 – 6.78 (m, 2H), 3.96 (dd, *J* = 9.5, 6.2 Hz, 1H), 3.85 (ddd, *J* = 12.3, 9.0, 5.5 Hz, 1H), 3.72 (s, 3H), 3.65 (qd, *J* = 9.0, 4.3 Hz, 1H), 3.03 – 2.94 (m, 1H), 2.24 (dddd, *J* = 12.7, 6.2, 4.5, 1.9 Hz, 1H), 1.94 – 1.88 (m, 1H), 1.88 – 1.62 (m, 6H), 1.49 (tdd, *J* = 12.9, 9.4, 3.6 Hz, 1H), 1.41 – 1.31 (m, 2H).

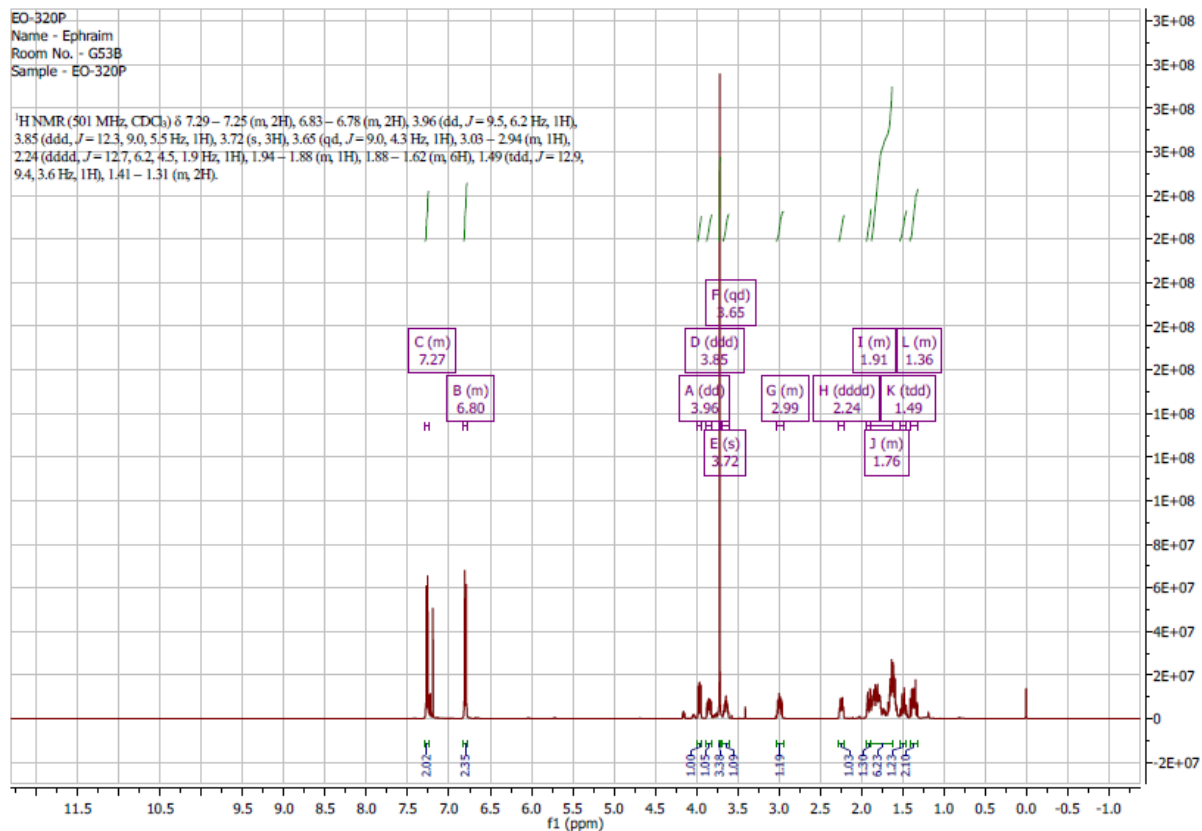

# 6-Isopropyl-8-(methylamino)octahydro-1*H*,5*H*-benzo[*d*]pyrrolo[1,2-*c*]imidazol-5-one 13

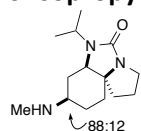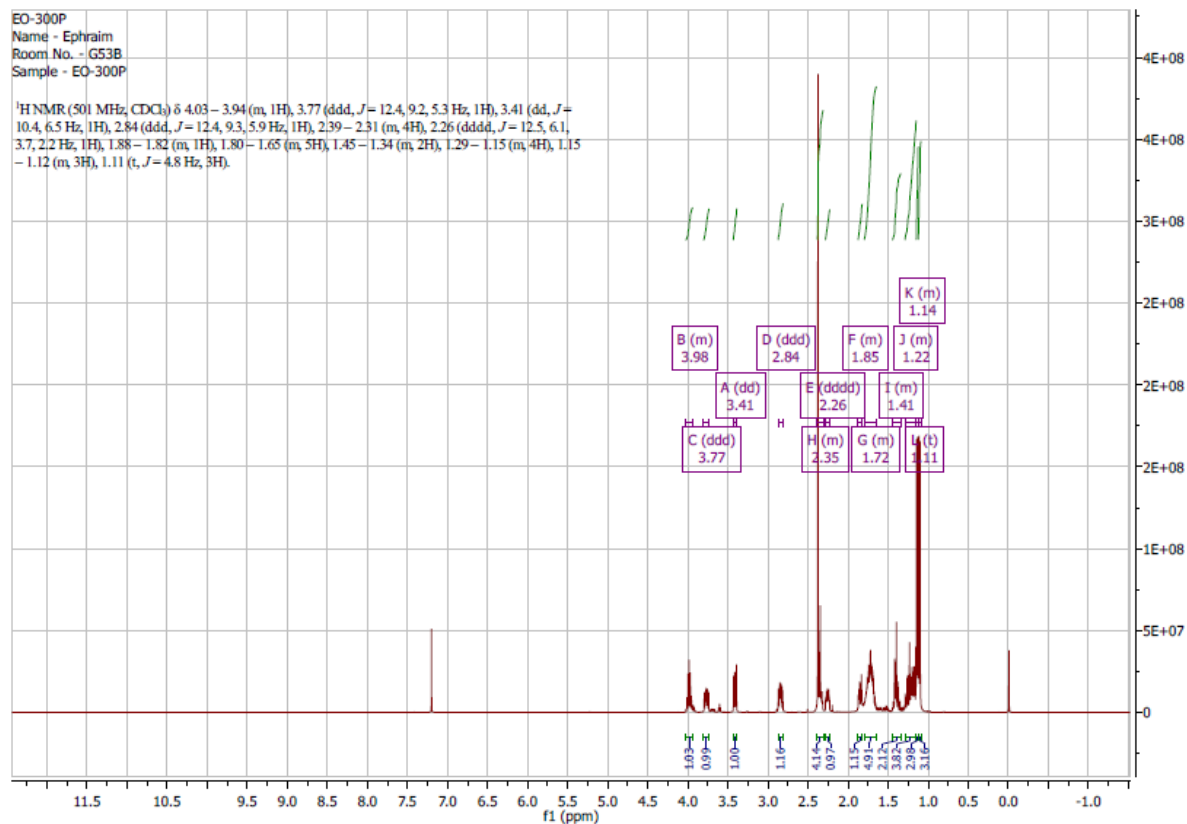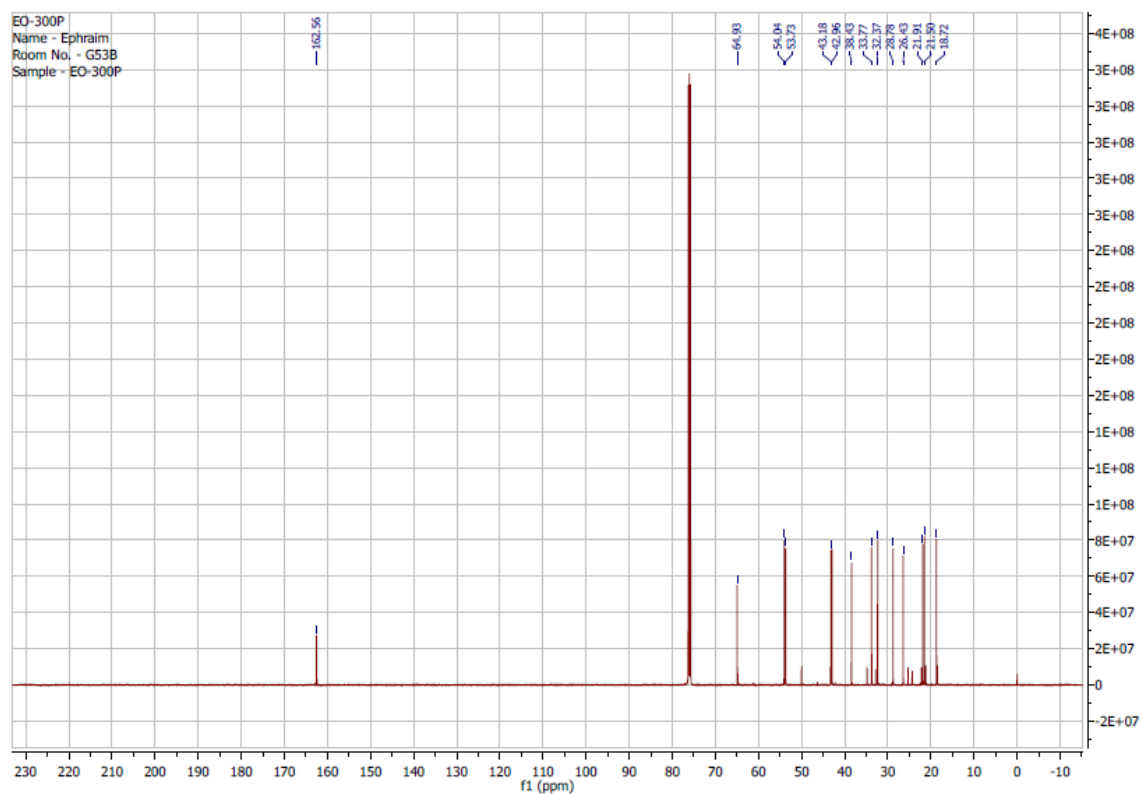



# 8-Hydroxy-6-isopropyl-2,3,6,6a,7,8-hexahydro-1*H*,5*H*-benzo[*d*]pyrrolo[1,2-*c*]imidazol-5-one 14

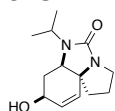

Name- Ehrain  
Room No- G53B  
Sample- EO-104P

<sup>1</sup>H NMR (300 MHz, MeOD)  $\delta$  5.87 (dt,  $J = 10.2, 1.3$  Hz, 1H), 5.67 (dd,  $J = 10.2, 2.2$  Hz, 1H), 4.26 – 4.17 (m, 1H), 4.05 – 3.90 (m, 1H), 3.84 – 3.76 (m, 1H), 3.76 – 3.67 (m, 1H), 3.04 (ddd,  $J = 12.2, 9.2, 5.7$  Hz, 1H), 2.44 (dtd,  $J = 11.2, 4.8, 1.4$  Hz, 1H), 2.05 – 1.79 (m, 2H), 1.69 (ddd,  $J = 12.3, 7.8, 2.6$  Hz, 1H), 1.61 – 1.38 (m, 2H), 1.28 (d,  $J = 3.7$  Hz, 3H), 1.26 (d,  $J = 3.6$  Hz, 3H).

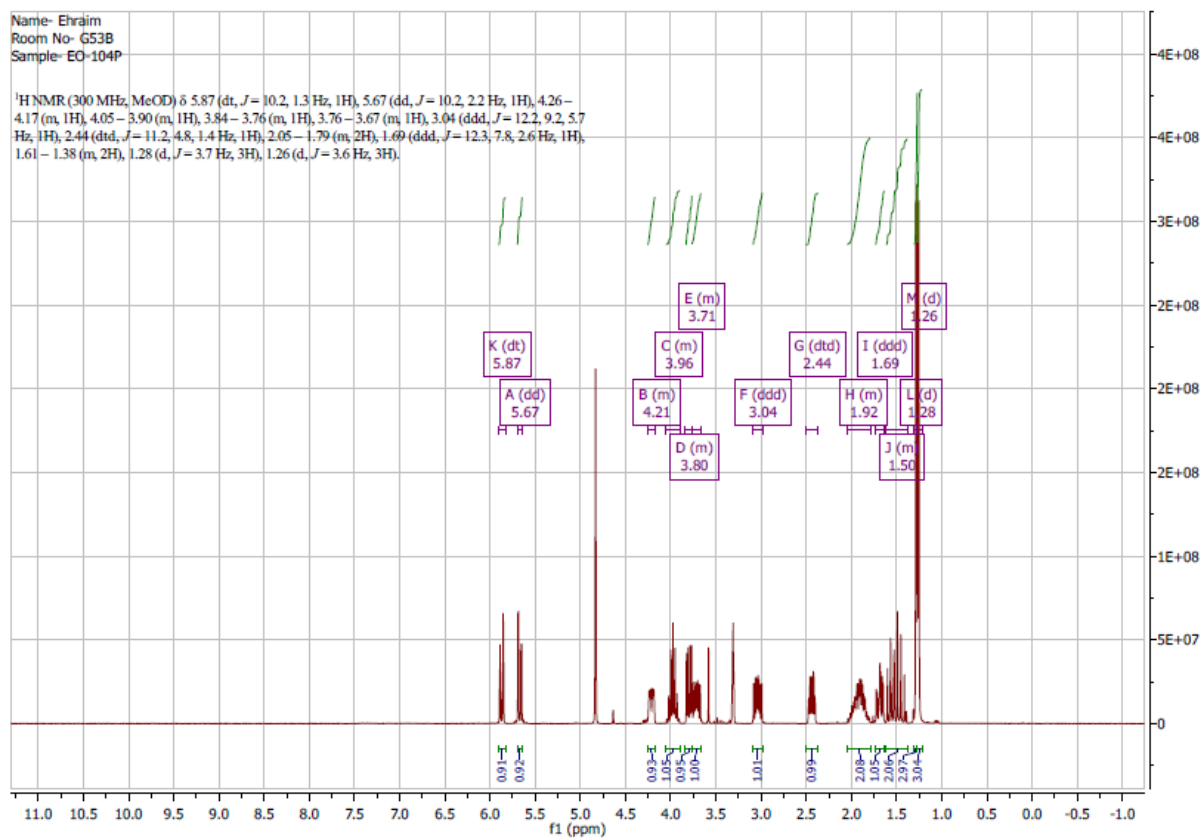

Name- Ehrain  
Room No- G53B  
Sample- EO-104P

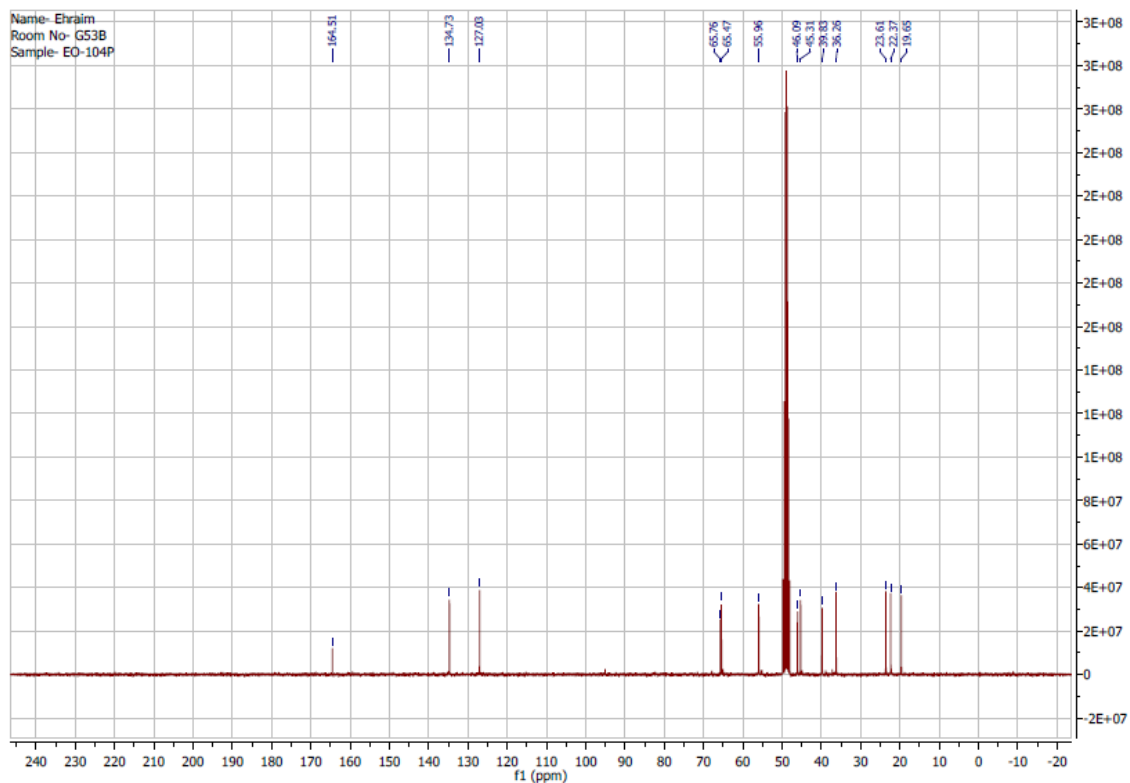

Methyl 6-(4-methylbenzenesulfonamido)-8-oxo-1-azaspiro[4.5]decane-1-carboxylate 15

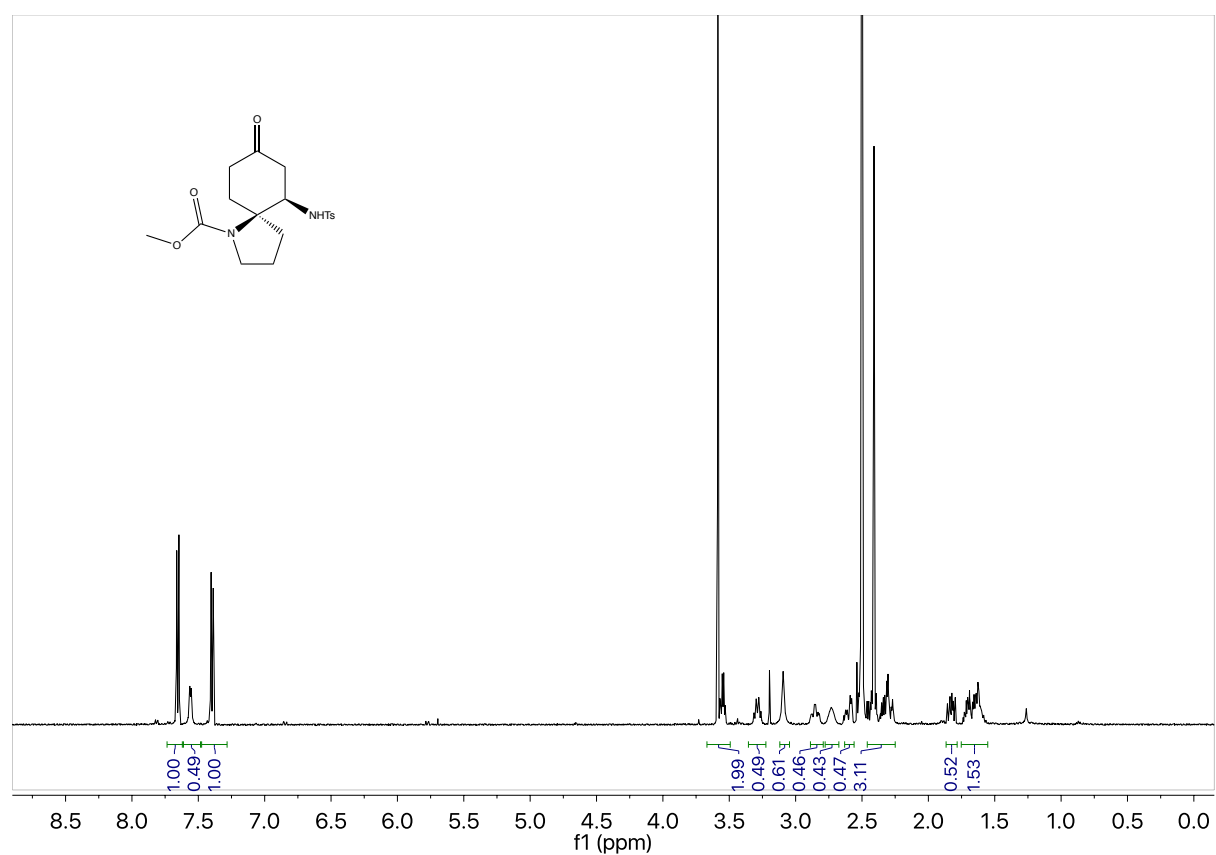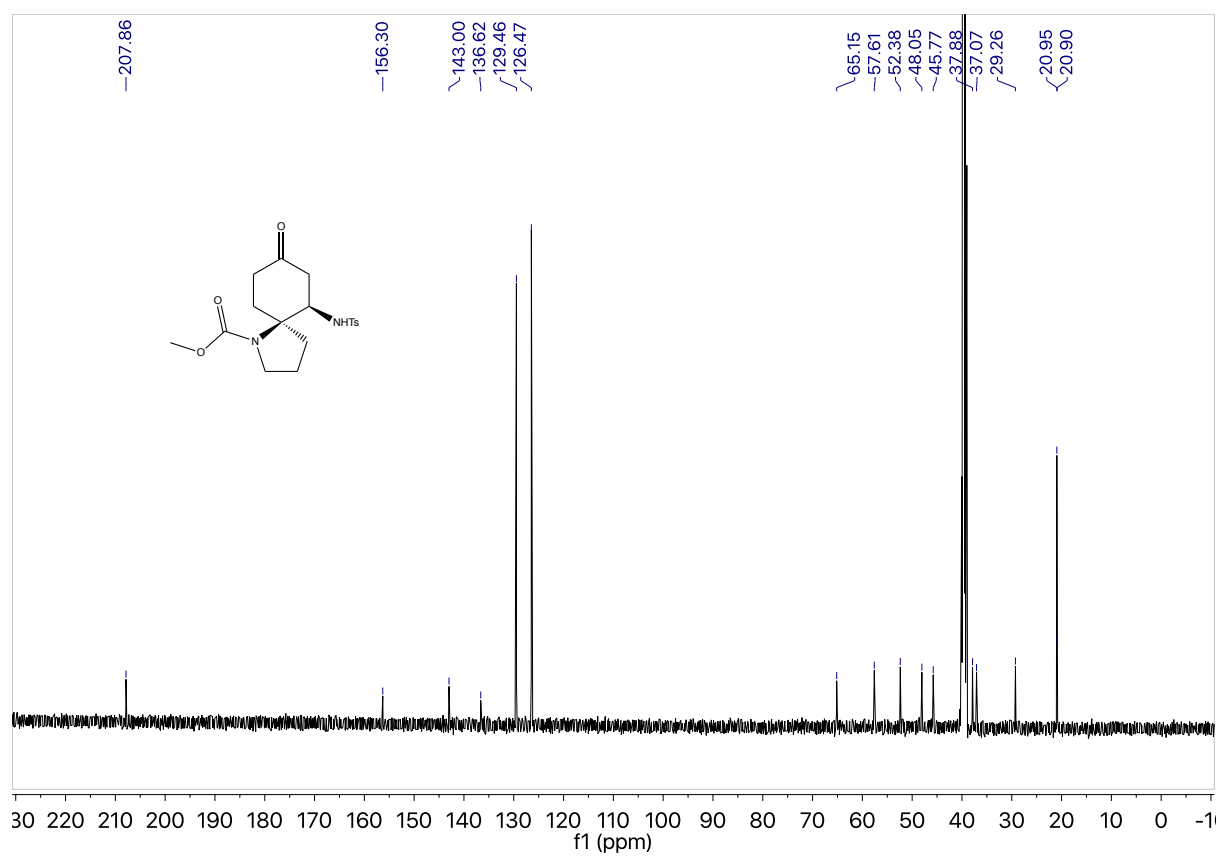

Supplement: d2cc06137f1.pdf [file d2cc06137f1.pdf]
